# Supplementary material for: Dimethyl sulfide control of the clean summertime Arctic aerosol and cloud
Source: Oxford University Press journal article supplement (doi:10.12952/journal.elementa.000017), 2013-11-26
Supplement: elementa_000017_s002.xls [file elementa_000017_s002.xls]

## Sheet: Number and Met data
	dN/dlogD			0.0325874
Date and time		10.4	11.1	12	12.9	13.8	14.9	16	17.2	18.4	19.8	21.3	22.9	24.6	26.4	28.4	30.5	32.8	35.2	37.9	40.7	43.7	47	50.5	54.2	58.3	62.6	67.3	72.3	77.7	83.5	89.8	96.5	103.7	111.4	119.7	128.6	138.2	148.6	159.6	171.5	184.3	198.1	212.9	228.8	245.8	264.2	283.9	305.1
2011-03-09 16:36:31		0	1.50631	0	0	0	1.10849	4.11381	0.956551	2.67063	8.61718	6.38327	8.29635	15.7186	17.031	25.0214	27.7698	33.2971	35.2939	43.5548	55.4971	62.6372	67.8458	73.8692	84.1567	101.488	104.24	119.656	111.676	141.545	150.901	151.613	179.273	174.696	227.949	236.955	272.135	304.617	316.034	337.59	321	329.019	310.343	267.758	261.601	228.161	199.243	158.446	131.841
2011-03-09 16:51:31		0	0	0	0.325981	3.27981	0	3.08494	0.956288	8.01163	4.1534	6.01067	8.92776	7.50157	14.9023	19.9277	22.9776	34.8545	36.3337	44.9119	52.7644	66.0615	68.7385	79.2362	81.0878	87.133	96.8939	111.582	110.404	135.056	143.269	158.552	182.903	212.937	242.168	255.896	252.404	308.015	299.876	329.913	332.814	319.694	314.77	298.838	262.746	239.619	198.902	175.851	156.268
2011-03-09 17:06:31		0	0	0	0	2.388	0	3.08486	2.86895	7.06974	3.37154	4.43269	6.94458	10.2931	16.9369	18.5459	25.7097	28.3255	39.5901	43.7862	61.449	61.9503	71.833	88.6913	79.8417	89.6484	98.051	111.771	117.354	124.707	138.105	149.912	174.954	186.3	201.16	235.683	271.3	293.375	315.054	330.442	326.74	314.529	297.819	288.133	258.626	235.23	182.223	169.095	141.116
2011-03-09 17:21:31		0	0	0	0	0	1.10855	1.02837	1.91248	5.34167	3.32308	2.80096	10.4601	17.1128	14.5465	21.0066	31.0489	28.221	34.7516	42.625	48.4071	63.6494	67.7994	73.3144	89.6529	105.103	99.1324	103.852	117.035	114.805	129.559	139.167	198.944	179.381	206.679	254.317	288.123	287.348	293.295	315.098	314.373	284.473	294.038	263.502	248.059	233.874	184.98	168.119	123.508
2011-03-09 17:36:31		0	0	0	1.28878	0	2.21671	1.02822	4.7808	2.67049	3.32256	4.42365	8.26429	16.1419	10.345	17.4664	24.6326	35.042	45.5965	44.1731	57.4574	61.3551	57.1929	75.6128	80.5237	78.7561	88.5923	117.236	105.42	129.728	134.849	159.613	154.551	199.443	202.272	237.804	262.402	284.259	324.545	317.983	321.782	307.123	290.501	276.811	237.188	208.061	181.827	158.726	117.284
2011-03-09 17:51:31		0	0	0	0	0	1.10825	2.05627	3.82442	4.45032	1.6613	6.71067	11.9451	15.7346	16.7168	29.9556	24.2205	27.0905	46.2375	40.1933	53.9064	61.6772	69.3763	80.2606	74.891	83.2705	93.9974	101.238	112.311	137.155	136.216	151.47	155.206	199.243	208.502	208.087	259.736	308.011	287.129	320.904	298.369	311.601	268.576	252.446	231.416	209.565	172.53	153.393	131.733
2011-03-09 18:06:31		0	0	0	0	0	1.10809	0	4.77984	3.55984	7.0217	5.59574	6.9449	12.2243	12.0005	14.3519	22.9013	39.5013	39.1718	45.5308	57.2035	54.4667	56.2391	78.6532	75.1978	83.2224	110.19	110.769	109.354	117.443	129.77	140.371	157.197	179.67	205.162	218.936	261.795	281.202	285.192	320.056	309.151	290.833	278.658	256.805	236.104	207.462	153.163	142.5	108.818
2011-03-09 18:21:31		1.62912	0	0	0	0	1.10803	2.05607	1.91188	2.67005	3.32183	3.68513	16.2492	11.5564	25.5314	22.2258	22.5431	30.7554	38.5375	41.0381	49.0385	60.8766	61.1311	72.9654	77.9619	90.6099	97.9542	100.217	111.152	127.176	128.013	129.605	160.134	160.114	195.2	233.42	244.631	266.783	284.517	314.293	303.979	270.052	273.686	243.98	229.537	187.658	154.493	144.966	110.108
2011-03-09 18:36:31		0	0	0	1.28854	2.38714	2.21615	1.028	3.82356	5.33946	6.64362	6.59965	12.8664	19.4698	17.1153	17.6786	23.9411	34.158	43.6237	59.2968	48.7038	57.5426	62.4785	74.2462	68.8663	82.5404	86.808	97.9609	103.606	121.244	136.096	142.229	158.536	191.074	188.782	224.479	249.766	284.493	280.363	278.918	308.568	287.863	262.352	234.465	215.186	214.868	163.217	125.896	118.025
2011-03-09 18:51:31		0	0	0	0	1.19375	1.10805	1.028	1.91174	1.77971	4.98298	9.68176	12.7239	12.7548	16.0287	20.3319	24.878	31.2498	39.3785	57.0779	54.9747	51.4471	64.1109	73.1391	70.7535	83.1705	88.8359	95.0186	105.029	106.827	117.434	142.897	157.698	174.758	174.043	225.19	230.585	281.016	287.975	282.388	311.843	276.987	288.854	223.329	202.971	197.624	163.736	139.114	109.747
2011-03-09 19:06:31		0	0	0	0	1.19335	1.10811	5.13939	1.9118	3.55936	3.32144	12.766	14.3371	15.7115	17.314	23.6228	22.7862	26.7344	35.4061	50.9119	37.4561	60.183	57.9772	66.0349	84.534	85.534	93.4978	105.758	119.048	116.882	131.495	135.345	157.753	160.451	181.462	205.184	242.171	264.617	274.738	305.264	283.458	294.884	259.678	256.322	205.629	180.565	153.397	119.177	102.606
2011-03-09 19:21:31		3.25782	0	1.39137	0	1.19351	0	0	2.86743	4.50901	6.58696	5.16622	9.10006	19.5341	20.2368	20.9848	28.8836	30.9647	43.8019	50.949	48.7654	63.0955	62.1157	67.225	72.6657	86.1365	91.0753	99.1285	110.371	121.625	120.79	147.989	143.96	179.569	180.978	215.24	226.384	251.985	265.33	281.927	278.536	275.012	263.415	226.733	205.14	181.55	144.379	125.37	105.233
2011-03-09 19:36:31		0	0	0	1.28832	0	0	1.02782	1.91156	5.41394	5.74202	6.58869	11.8614	10.2509	21.0601	21.2602	27.1807	37.9756	35.0923	47.4596	50.3679	63.1125	61.0442	69.6417	68.4106	75.1356	107.958	103.277	106.368	109.285	109.839	128.596	138.211	157.83	204.779	223.88	226	243.832	273.738	284.81	277.298	269.437	267.338	237.037	217.476	168.706	143.81	129.76	91.8401
2011-03-09 19:51:31		1.62862	0	0	0	0	1.10787	1.02769	1.9116	6.2284	9.96292	8.26452	10.4092	10.3879	26.6911	31.1571	23.7833	32.5167	38.1971	40.2026	48.9641	55.6205	64.9032	72.1933	80.4353	82.2298	91.3551	108.766	104.078	122.451	119.399	140.949	162.849	154.665	196.134	208.804	230	256.458	282.642	288.129	290.697	281.208	247.136	229.289	203.95	178.127	127.905	110.726	93.8801
2011-03-09 20:06:31		0	0	1.39133	0	1.19319	1.10795	0	2.86721	1.77961	4.98176	8.22952	17.0755	14.3826	16.8315	20.4431	26.8544	32.9304	37.8147	35.4885	47.4122	47.8125	65.6407	64.8718	74.909	89.0446	90.1051	87.3282	101.077	121.863	121.112	133.892	155.293	160.266	176.604	181.446	237.464	240.619	267.326	293.834	293.866	291.63	246.671	218.121	193.431	162.907	150.388	117.053	94.3458
2011-03-09 20:21:31		1.62867	0	0	1.28822	0	0	4.11048	1.91132	5.33817	5.87609	5.93897	11.1222	19.7149	21.7336	21.4334	29.7648	33.1599	39.9603	44.5936	46.6397	58.1869	54.8051	76.108	62.7824	77.6385	101.92	109.951	97.2974	111.417	146.819	122.314	152.292	163.956	187.121	200.958	220.649	280.156	255.379	277.6	282.803	262.829	250.272	203.039	224.263	165.689	139.423	129.064	85.0314
2011-03-09 20:36:31		0	0	0	0	2.38642	1.10785	1.02758	7.00308	3.26699	7.47208	4.36615	11.3319	13.3062	18.0002	23.486	33.6372	36.3644	42.5744	42.9147	40.4875	51.6978	59.7208	60.7417	72.2401	97.75	100.829	91.401	94.1798	119.333	134.085	124.035	165.555	180.809	180.545	227.824	251.002	257.246	253.62	294.213	286.943	278.273	251.13	224.303	205.365	159.177	129.618	120.529	95.6365
2011-03-09 20:51:31		0	0	0	0	2.38642	0	1.02766	2.86691	5.33801	2.93702	7.78071	12.689	12.2356	13.5592	26.989	29.6532	25.398	38.5814	37.7776	44.6266	63.4548	54.3968	68.9971	66.7183	85.7054	85.8074	94.9244	95.8686	105.681	115.504	119.457	159.926	187.686	184.894	231.394	231.358	257.49	284.091	276.422	314.652	282.402	268.521	225.018	197.546	155.375	137.199	116	83.1038
2011-03-09 21:06:31		0	0	0	0	0	1.10775	1.0276	2.86691	6.22753	7.1034	5.42311	9.11609	15.8126	16.9387	18.5707	25.137	25.8109	29.8548	45.9596	45.8827	55.0574	53.4452	69.8763	73.4635	74.3984	88.7369	104.101	99.7897	128.77	125.202	141.633	163.984	185.28	191.258	214.9	235.096	267.819	268.732	305.621	284.702	268.894	250.098	228.908	210.859	175.1	134.062	124.287	99.5673
2011-03-09 21:21:31		0	0	0	0	0	1.10761	3.25394	4.61865	5.33788	4.15096	7.47128	11.304	12.5172	14.0483	19.6677	22.5813	33.7167	39.5792	41.633	46.3881	57.0782	56.7423	70.7458	82.1173	81.0045	99.517	96.6689	100.646	119.993	134.84	149.095	155.515	159.501	180.799	208.053	232.468	253.942	275.094	292.181	301.566	286.04	274.816	228.512	213.473	187.254	154.76	123.898	104.181
2011-03-09 21:36:31		0	0	0	0	0	4.43109	3.08293	2.86697	5.33788	2.94235	10.1439	14.7431	11.4778	8.65635	29.2507	25.9581	33.9779	42.4365	46.2468	42.2279	63.1276	53.9016	71.2401	76.1619	89.6907	90.0333	108.756	115.85	118.596	123.556	134.557	155.785	163.243	187.925	228.121	249.756	276.649	277.344	312.101	294.471	281.913	242.582	235.234	212.814	163.614	153.047	111.113	102.137
2011-03-09 21:51:31		0	0	0	0	0	3.32327	1.02763	3.82263	3.55875	5.81135	8.92622	6.85141	14.389	14.5046	18.7316	27.1596	32.1814	32.8487	41.3266	44.5353	54.5115	59.0564	70.8372	80.492	88.5904	99.6532	102.173	108.358	108.319	133.186	115.084	161.723	162.099	185.202	205.226	250.222	272.133	275.871	301.444	293.676	288.818	261.989	225.032	226.669	180.849	159.385	133.604	96.5756
2011-03-09 22:06:31		0	0	0	0	2.38634	0	2.05517	6.68933	5.33795	6.64128	6.05442	6.95263	12.4007	22.1562	26.5239	24.3404	31.8201	37.1917	48.7115	50.4064	68.9894	62.8647	61.5131	75.3503	83.9795	90.2705	100.014	97.0971	112.814	131.897	145.499	159.834	169.784	192.58	228.037	248.802	276.564	270.827	307.74	289.179	278.922	280.533	248.009	226.252	174.565	141.877	136.16	100.792
2011-03-09 22:21:31		0	0	0	0	0	2.2153	3.08275	3.82234	5.3374	6.64096	6.77285	9.81833	16.5571	17.5863	25.1966	23.6961	34.6654	35.1484	34.5173	47.8804	57.9798	59.7881	74.9837	77.2282	89.8965	96.2615	109.037	118.87	112.981	135.24	146.208	167.726	172.286	195.05	226.763	243.287	278.047	255.279	311.711	291.368	272.079	252.099	230.685	227.131	182.522	149.617	131.791	120.725
2011-03-09 22:36:31		0	0	0	0	1.19327	0	3.08289	3.485	7.58106	4.01138	3.6808	11.3052	15.1921	13.806	22.4646	30.8487	32.1189	34.451	39.0497	53.5167	58.1048	52.516	69.0542	75.7458	81.2907	97.4391	103.163	104.898	115.299	138.628	130.226	182.71	190.889	206.719	220.917	256.458	268.904	267.133	277.991	268.446	269.938	258.283	255.739	219.601	193.646	144.98	133.802	106.833
2011-03-09 22:51:31		0	0	0	0	1.19315	1.10763	3.08273	0	3.55853	9.13141	11.2635	10.6891	11.3609	19.9549	25.617	23.3536	34.0933	38.3058	46.749	61.5692	57.8635	68.2202	63.0337	72.0439	86.7202	91.8433	97.9324	108.227	122.75	132.622	155.08	174.241	184.022	208.349	240.926	262.73	247.442	243.984	299.277	285.603	271.985	248.207	235.148	216.662	201.32	146.789	130.811	102.703
2011-03-09 23:06:31		1.62833	0	1.39088	0	0	2.21495	3.08273	3.82202	3.5583	4.15045	5.21952	10.0982	19.3276	15.7092	25.6068	29.3235	31.975	39.9542	44.9231	44.658	59.4962	60.3622	64.9292	79.0718	77.784	85.0869	102.986	107.375	112.141	129.195	132.869	161.066	188.588	189.834	210.198	240.146	246.378	288.171	268.758	267.846	275.635	232.754	233.848	187.84	168.636	134.689	121.564	107.696
2011-03-09 23:21:31		1.6284	0	0	0	0	0	2.05509	1.91112	3.69788	6.5108	5.96109	11.7867	17.0859	20.0741	23.2416	25.3696	50.4635	43.1054	55.2849	47.4276	39.1946	65.9974	69.5814	73.433	84.3561	101.022	101.874	104.619	119.673	140.952	140.178	161.953	213.478	207.851	193.193	228.508	275.867	264.309	266.865	290.17	280.583	250.693	217.023	191.48	175.425	135.631	109.634	86.3926
2011-03-09 23:36:31		0	0	0	0	0	0	2.05509	1.91118	8.00603	9.13141	7.38058	12.8279	15.5725	14.3605	25.6865	29.9277	31.1482	32.9997	40.3657	51.6199	63.5272	63.7679	69.9881	73.9747	81.7994	92.6308	102.589	107.466	116.283	115.606	158.67	169.519	167.334	189.96	220.369	227.334	255.393	252.822	289.94	276.585	269.307	245.038	237.736	175.172	168.738	149.779	113.239	89.1154
2011-03-09 23:51:31		0	0	0	1.2879	0	1.10771	2.05529	0.955647	1.77925	1.66038	8.25526	9.07731	21.7899	18.0125	18.9174	24.4555	31.508	39.4468	47.3792	44.8369	48.8955	58.2343	66.5163	73.1965	76.6631	91.8458	99.1888	111.78	112.73	128.144	139.13	157.386	186.062	195.883	206.739	238.017	255.509	261.094	265.963	279.986	275.459	244.05	223.946	172.762	173.373	140.353	115.812	91.0244
2011-03-10 00:06:31		0	0	0	0	0	0	3.08281	3.8224	2.66895	8.30093	11.1407	11.5187	12.4881	17.9826	24.3716	33.375	41.9401	40.2814	49.3215	49.1157	55.5997	59.8346	76.6208	75.7776	70.0724	85.4106	100.444	101.652	123.672	122.684	138.7	160.923	178.049	199.628	211.695	219.349	254.798	261.845	294.283	262.488	259.189	234.978	225.703	189.858	154.395	140.269	111.63	89.5083
2011-03-10 00:21:31		3.25699	0	0	0	1.19313	0	2.05509	0.955548	4.44801	7.94429	7.78266	11.7872	16.3699	17.766	28.9776	27.1775	37.4074	35.926	40.1439	47.1731	53.284	50.1609	70.6304	75.4045	72.5343	84.5817	97.424	114.904	106.527	125.651	147.398	167.817	185.545	193.081	213.063	209.902	254.66	275.387	266.02	277.208	260.831	236.909	211.641	185.144	158.219	134.942	99.0699	87.4827
2011-03-10 00:36:31		0	0	0	0	0	1.10763	0	2.86687	6.22744	9.58962	10.9341	15.883	14.5018	24.9549	24.6853	24.1393	30.003	41.3099	46.3779	45.784	49.0702	59.5183	68.826	68.851	81.3878	88.051	106.489	108.445	110.8	127.965	146.232	153.165	172.825	175.404	221.11	230.335	238.722	271.378	291.645	272.41	251.446	231.979	206.843	180.982	162.117	132.069	80.2099	85.4728
2011-03-10 00:51:31		0	0	2.78225	0	1.19321	1.10775	1.0276	5.73372	2.66885	5.81109	9.85715	10.4408	11.0849	20.3287	16.8612	25.227	30.2121	44.2032	45.2926	48.5426	55.4362	55.0285	54.0676	72.751	77.8577	83.599	97.4558	113.133	113.88	125.649	152.628	173.127	171.474	201.452	230.453	233.381	247.608	271.214	267.676	265.024	230.879	246.202	198.96	170.523	162.907	122.752	107.727	75.1958
2011-03-10 01:06:31		1.62854	0	0	1.28816	0	1.10773	0	5.73353	1.77911	4.98112	7.52407	12.5574	14.368	24.3378	25.7466	20.5333	34.5554	41.1872	41.3401	52.7413	58.5853	62.0311	69.0045	66.6679	74.0949	96.5744	102.705	101.529	114.058	129.752	155.05	162.33	176.14	202.46	213.842	236.094	254.922	267.524	272.58	266.474	234.782	237.67	192.604	173.429	152.875	123.649	98.6987	85.3622
2011-03-10 01:21:31		1.62854	0	0	0	0	0	3.08267	3.82224	4.55478	8.20202	5.18913	15.7368	20.6221	21.3319	28.7033	24.1757	38.526	45.4147	44.3199	41.1109	54.3817	57.1135	57.2571	70.8926	80.3753	94.1894	92.2699	116.412	101.655	118.407	138.479	158.98	170.084	194.103	219.129	213.365	243.399	282.829	281.21	245.501	248.8	236.625	206.19	168.562	151.124	112.764	94.4269	81.0494
2011-03-10 01:36:31		0	0	0	0	0	1.10777	1.02763	1.91104	5.49474	8.98455	6.00724	16.1788	13.6913	25.5759	28.734	24.3208	35.0814	33.5266	43.5163	43.8202	52.308	58.226	62.4574	69.1548	77.3106	96.7	105.376	107.254	113.992	144.467	150.146	162.136	172.893	184.956	203.167	224.7	245.815	282.718	272.951	258.842	255.226	230.755	198.335	165.146	134.721	113.34	83.3317	77.1923
2011-03-10 01:51:31		0	0	0	0	0	0	3.08253	1.91116	2.66837	4.98026	7.50292	12.0594	23.6162	18.3558	26.6869	34.5583	34.0144	39.4667	44.8465	45.8795	53.8196	50.0651	67.5689	73.5942	81.5333	92.5221	102.411	109.234	122.73	133.65	141.983	153.916	167.484	190.573	212.296	237.745	266.929	257.246	265.653	262.152	244.042	232.961	210.295	168.083	138.64	118.835	108.283	81.4253
2011-03-10 02:06:31		0	0	0	0	0	2.2155	3.08267	2.86657	3.55843	6.64096	7.41247	16.3646	17.988	22.3179	26.3121	30.4627	33.7288	32.9452	31.9788	53.009	49.4724	64.016	59.1619	67.3971	80.526	106.362	87.4997	101.902	119.118	129.137	132.272	159.705	168.099	197.78	215.475	218.532	265.072	255.178	283.083	288.415	256.677	230.427	206.929	184.686	129.379	114.207	85.8686	80.5622
2011-03-10 02:21:31		0	0	0	0	0	2.21534	3.08257	0	3.55859	5.45103	11.6071	15.6773	22.7103	20.1496	34.3449	27.653	34.5817	34.9212	43.1375	38.8458	52.9926	70.4837	65.0702	82.2862	102.1	79.8179	89.1269	106.941	115.432	122.521	138.169	160.248	173.301	198.297	219.327	244.485	258.37	280.236	289.683	259.269	231.705	231.691	191.172	170.086	131.654	119.627	90.2737	73.4391
2011-03-10 02:36:31		0	0	0	0	0	1.10757	2.05489	2.86643	6.22663	9.96138	9.80571	13.2412	17.3926	22.0686	30.2424	24.4475	37.2808	37.6301	50.9731	53.8144	51.7388	65.3772	52.9763	68.8913	85.1894	83.6654	95.8321	101.269	113.986	128.149	133.34	151.148	185.731	192.39	215.751	222.456	243.378	260.619	276.835	268.471	247.178	228.229	202.088	155.519	140.871	110.029	100.657	75.9135
2011-03-10 02:51:31		0	0	1.39104	0	0	0	1.02756	2.86665	2.66865	8.30138	8.17429	11.4499	11.9107	19.3092	24.7208	31.6526	37.7064	37.0381	46.2471	50.5234	48.8625	56.2391	70.7301	66.4404	81.4337	89.7135	102.387	114.976	132.171	127.889	157.88	163.788	180.254	185.417	207.364	228.169	245.577	264.507	268.502	264.676	230.254	226.172	195.601	165.843	129.293	105.679	91.825	65.6542
2011-03-10 03:06:31		0	0	0	0	0	2.21545	2.05515	0.955628	8.00638	9.96103	9.81224	13.245	18.4367	25.1228	23.0463	23.904	37.0872	35.2301	44.3843	49.7288	53.4997	51.1013	56.9272	78.0811	92.5577	86.2615	105.206	105.047	121.387	137.935	139.291	170.833	178.235	185.282	213.021	242.572	251.518	266.372	274.343	262.091	240.132	214.609	202.197	178.824	138.872	112.524	96.0212	77.9529
2011-03-10 03:21:31		0	0	0	0	0	3.32285	2.05491	0	2.66851	3.32029	11.3678	11.0248	20.9884	19.1937	27.6118	23.4356	31.4383	33.5631	37.9003	48.1429	51.4083	64.751	64.233	68.5317	78.9218	83.5567	96.7272	99.4365	110.924	119.525	135.915	174.479	186.701	211.979	213.159	246.392	249.177	250.202	265.064	258.856	239.76	213.193	204.846	162.446	136.374	125.148	103.471	74.7554
2011-03-10 03:36:31		0	0	0	0	1.19299	0	0	2.86669	4.44821	6.31971	9.98234	12.8174	15.5765	21.1545	28.0246	30.7069	34.5933	32.3231	49.5244	44.058	54.8006	62.2978	62.6074	73.1542	81.7022	98.3849	93.5397	106.302	108.092	132.347	134.109	156.773	178.057	189.021	225.683	214.058	259.485	269.894	264.022	263.085	253.462	212.025	207.806	164.069	148.035	119.58	90.1285	73.9465
2011-03-10 03:51:31		0	1.50533	0	0	0	0	1.02746	1.61532	5.61237	5.47481	15.3996	12.6036	16.3702	23.8251	23.355	35.2615	32.6045	36.2513	37.076	50.8247	42.6192	56.5571	60.5965	72.9949	80.0526	90.3609	89.1157	109.308	121.741	129.826	142.133	164.213	177.189	195.437	205.06	219.433	239.199	256.102	264.665	256.206	234.918	223.964	195.481	166.775	140.649	124.495	91.799	83.3577
2011-03-10 04:06:31		1.62833	0	0	0	0	1.10761	4.11026	2.86662	5.33702	6.31526	8.49692	9.76788	15.4815	26.6026	28.6476	29.9281	39.9413	37.2205	39.0833	39.7346	58.5128	55.5782	62.059	65.3215	75.0494	88.9173	98.9779	110.883	115.28	121.199	144.579	159.864	170.09	186.829	225.423	240.357	243.654	256.58	271.152	272.785	233.319	225.429	192.879	165.054	130.254	110.348	85.5333	73.6481
2011-03-10 04:21:31		0	3.01042	0	0	0	0.66266	1.60552	3.66837	7.11609	9.79587	11.4004	11.1122	13.0418	20.6983	23.2993	34.2022	33.6407	31.7628	42.5468	37.2247	48.2144	50.9016	59.1696	65.7837	77.5423	87.4311	99.0353	89.7413	119.774	125.721	151.522	153.782	174.435	200.907	210.525	241.538	266	252.843	262.566	240.503	239.022	186.637	181.492	154.072	129.932	107.695	85.4837	73.2529
2011-03-10 04:36:31		0	0	0	0	0	0	1.02753	0.955548	2.66843	1.66022	6.57016	16.6486	22.9806	21.3814	27.962	33.2436	31.1537	30.8582	38.8103	39.3231	52.5571	52.6535	62.6519	61.9019	71.1064	90.6929	96.5487	97.9885	106.37	111.223	155.467	160.857	184.064	188.041	221.39	237.744	237.476	255.412	264.197	246.438	211.863	199.571	189.715	154.315	138.386	111.832	81.6734	80.5808
2011-03-10 04:51:31		0	0	0	0	0	0	1.02753	5.73337	2.8061	6.51266	5.79253	12.2426	12.9908	24.8386	30.7109	41.3776	33.6724	40.0782	34.6798	47.1109	44.109	46.8929	57.2846	59.1942	66.8353	74.3308	100.694	95.4205	109.212	133.592	157.157	160.359	178.115	200.751	215.337	254.657	238.844	271.128	243.682	220.705	229.67	195.759	189.688	152.157	140.02	105.338	72.1314	63.6295
2011-03-10 05:06:31		0	0	1.39103	0	0	1.10771	2.05501	3.82196	6.22676	7.11362	14.0936	11.11	10.1403	20.0651	24.0413	17.6056	34.2295	40.8718	32.9696	44.0391	53.1622	51.7615	56.4186	58.4519	73.0115	73.1554	91.8769	100.666	124.597	130.994	140.647	157.596	189.936	186.394	198.984	214.467	240.583	245.441	240.821	239.447	224.397	192.372	177.939	147.268	133.975	105.583	79.9276	73.301
2011-03-10 05:21:31		0	0	0	0	0	1.10765	2.21324	6.54186	5.33731	9.13087	16.73	12.599	13.3317	21.6484	24.3932	29.3582	31.4167	35.3212	43.1628	49.667	52.0494	52.95	51.359	68.4734	76.2349	64.7923	107.19	110.531	117.368	136.294	147.977	149.986	166.336	186.42	198.502	236.975	243.489	251.06	245.106	243.504	226.034	197.029	171.518	143.942	128.213	98.3087	73.0936	66.3808
2011-03-10 05:36:31		0.915404	0	0	0	0	0	2.05513	4.77779	3.55821	10.9215	10.9759	19.4187	18.7497	25.5379	23.4581	37.7263	31.6847	45.6173	35.6032	34.3788	40.5061	51.4212	53.3003	55.5571	71.0728	102.992	102.347	98.3022	115.277	121.37	140.733	140.811	151.793	203.343	226.813	216.564	252.384	269.904	245.988	228.86	214.636	196.474	169.269	132.584	117.077	97.067	82.8106	70.4772
2011-03-10 05:51:31		0	0	0	1.28796	1.19311	2.21542	2.05499	0.95551	5.33737	9.96135	12.0884	10.3996	15.9879	21.0947	24.0617	25.2737	35.1894	37.8907	41.0958	39.283	42.8603	45.634	60.4253	63.2051	77.9423	88.6715	85.4388	102.355	114.757	127.138	137.544	168.666	185.399	194.86	212.482	243.604	239.729	243.005	246.18	246.622	230.26	214.393	170.499	150.727	121.641	95.0955	89.3138	61.7596
2011-03-10 06:06:31		0	1.50521	0	0	0	0	2.05501	2.86662	7.11644	8.30112	15.1506	9.11779	18.3571	30.1562	18.8679	29.534	27.0777	39.5853	38.7173	43.5734	47.4744	50.3968	59.9561	63.4593	65.4484	81.4167	87.7067	114.088	119.599	146.266	138.179	168.454	186.254	182.035	207.476	210.387	259.285	267.458	246.867	254.788	222.456	185.767	165.807	144.098	123.299	89.3304	72.1933	60.9228
2011-03-10 06:21:31		1.6283	0	0	0	0	1.10763	0	4.77763	3.55824	7.47071	13.5701	11.799	20.5463	15.8971	24.5224	31.6827	38.4346	32.283	38.9192	49.6048	42.9827	43.784	53.1224	58.9131	62.4218	75.4692	97.5346	107.245	116.739	131.256	156.148	162.53	180.735	188.482	216.5	230.851	238.758	254.978	256.767	233.087	214.335	190.978	175.038	142.748	115.304	93.3154	74.0814	63.6157
2011-03-10 06:36:31		0	0	0	0	0	2.2153	2.05505	5.43292	3.37304	12.8857	13.0147	4.90474	12.7863	18.648	25.4239	21.72	32.0174	35.3785	38.2673	47.7862	50.9362	58.1551	63.1019	71.5907	68.4196	82.2712	99.1593	105.092	110.632	122.125	143.075	162.622	178.375	193.077	221.254	257.734	232.474	237.61	260.883	217.248	208.958	175.879	165.19	130.058	137.089	103.43	72.0474	62.5343
2011-03-10 06:51:31		0	0	0	0	0	1.10783	1.02754	0.95575	2.66913	5.05862	16.6741	12.1633	14.6759	13.5983	25.252	28.0429	36.1955	35.9244	34.9913	47.1179	50.2897	51.1327	64.5766	57.3535	72.1808	92.5673	96.9619	107.94	116.462	138.898	146.803	160.126	174.596	211.18	242.845	254.678	253.694	263.596	245.813	235.859	212.162	189.088	186.294	154.95	116.527	106.488	89.6061	60.7131
2011-03-11 00:06:31		0	0	0	1.28782	0	2.21503	3.08197	1.9107	4.61535	3.16276	7.48292	9.68744	14.1999	17.5879	21.2178	31.0068	32.224	26.9279	43.7128	38.1109	51.5721	67.5756	70.8917	69.0058	90.4561	94.7599	104.405	113.818	109.019	117.224	125.745	160.619	190.595	183.864	243.658	260.777	275.665	255.082	305.976	287.32	284.024	257.837	222.66	227.562	183.303	167.78	133.982	118.708
2011-03-11 00:21:31		0	1.50489	0	0	1.19285	0	0	1.91084	1.77891	5.80971	12.1128	13.5214	14.8964	18.008	22.7478	25.9956	33.7324	39.016	48.0622	48.9179	49.2862	58.9042	68.8551	77.3712	76.1436	94.134	103.694	110.58	114.562	123.662	139.545	154.095	181.841	194.984	214.497	264.461	268.848	269.225	270.944	296.633	283.237	264.479	227.144	206.41	197.879	159.349	143.061	116.05
2011-03-11 00:36:31		0	0	0	0	0	0	0	1.91086	3.5576	4.14987	6.03692	9.32994	11.7832	17.4603	18.1117	24.1585	33.9295	34.9484	42.7772	48.7971	55.251	62.9192	67.4651	67.5596	82.8814	95.4949	92.0045	101.519	117.738	133.57	141.931	165.419	181.955	212.141	239.623	249.766	283.614	283.197	285.108	281.691	307.62	274.345	255.944	226.569	211.951	182.055	145.695	128.802
2011-03-11 00:51:31		0	3.00973	0	0	0	0.684776	0.392128	0	1.97765	2.30419	1.49868	5.39285	9.08433	15.48	12.7047	18.7664	26.5485	24.4898	40.4099	42.433	43.2769	58.6045	72.3128	74.9157	94.6571	93.9048	101.35	106.769	104.054	127.722	146.294	183.291	200.595	220.921	243.654	254.517	274.766	297.077	283.596	302.183	299.389	292.466	266.693	250.008	207.147	197.907	151.653	140.312
2011-03-11 01:06:31		0	0	1.39077	0	0	2.21476	1.02726	0	0.889282	3.87712	3.87282	4.75167	10.2175	6.93487	11.1773	22.8412	26.4681	22.9197	40.7647	37.6968	54.6135	61.3362	70.9016	73.8253	88.3808	83.7875	99.2208	101.608	104.832	121.262	147.891	171.302	192.835	217.316	263.229	263.55	281.092	290.479	293.093	288.932	286.42	291.294	270.1	222.051	224.501	175.056	154.768	131.781
2011-03-11 01:21:31		0	0	0	1.28772	0	0	1.02722	0	2.66783	4.14926	5.22647	6.98378	7.60814	8.72763	13.8271	18.9374	25.2933	30.4069	40.8497	43.133	58.3327	56.8548	72.6542	69.0612	82.7285	81.4949	103.139	101.92	109.854	134.385	169.219	159.149	182.793	216.548	218.471	229.221	275.026	305.537	304.712	302.646	294.858	286.799	257.872	245.685	228.213	191.136	160.451	137.594
2011-03-11 01:36:31		0	0	0	0	0	0	1.0273	0.955269	3.5575	2.48963	6.09196	6.38647	10.0891	9.12897	14.3203	20.0244	28.2931	29.8602	45.567	42.4212	43.9478	57.0946	68.301	69.0837	80.5513	91.4391	94.3128	111.6	114.237	139.309	154.325	160.04	199.844	205.499	241.785	239.329	276.464	295.671	301.851	307.869	289.605	281.857	249.079	252.925	216.793	189.553	156.264	123.74
2011-03-11 01:51:31		1.62785	0	0	0.483455	0.744872	0	2.05429	0	0.889202	1.65958	6.92032	7.70417	7.05657	19.4509	14.4503	15.2926	21.0395	29.8864	36.1135	43.1221	51.3487	57.4696	76.184	70.3625	81.7449	95.3266	100.796	94.0003	126.805	124.967	116.591	170.713	185.739	201.352	239.928	274.038	260.641	292.199	302.22	311.556	281.841	286.086	270.092	240.573	224.018	171.769	165.931	125.633
2011-03-11 02:06:31		1.62788	0	0	0	0	2.21458	0	0.955128	4.44631	2.48932	5.11712	9.74234	5.39163	17.7188	10.318	30.3379	27.9373	34.0381	38.0038	42.9212	56.6872	64.9756	63.0744	77.8978	71.8147	97.0942	88.4942	105.388	110.938	145.098	146.831	161.022	181.26	212.983	250.633	259.996	277.356	293.325	299.285	293.572	302.16	261.801	262.047	258.636	212.131	189.457	147.167	127.893
2011-03-11 02:21:31		1.62787	0	0	1.2876	1.19271	0	3.08163	2.86556	3.55708	6.63865	4.55042	4.79179	5.69696	7.36272	14.9757	18.2936	21.0425	30.5012	42.6439	47.3343	45.8865	56.4513	59.4946	73.7641	79.0926	91.8894	95.7542	97.434	116.626	116.892	135.064	175.747	177.745	209.231	246.322	272.378	252.336	276.471	288.906	304.668	295.753	261.741	256.026	218.105	202.47	189.505	161.464	137.861
2011-03-11 02:36:31		0	1.50467	0	0	0	1.10729	1.30016	5.47692	6.2249	3.31891	6.82138	9.08048	10.9342	20.2393	18.5601	25.6156	23.6136	23.9229	39.0147	46.6433	50.3006	62.475	68.2808	74.2077	91.3808	88.176	109.641	119.004	128.754	139.549	151.551	159.243	173.031	203.918	233.317	261.288	284.529	296.442	300.958	288.283	277.149	276.32	259.771	235.02	217.346	187.604	163.391	137.851
2011-03-11 02:51:31		1.62774	1.50469	0	0	2.3853	1.10723	1.02712	0.95517	3.55708	5.55186	9.26881	7.83455	8.07295	14.9957	19.8578	24.2282	31.502	30.9662	36.0817	45.1032	56.9208	55.3753	48.7974	77.6103	90.2285	92.392	99.6824	114.979	112.181	123.183	141.759	162.654	202.186	210.154	243.576	270.332	276.641	302.798	279.037	281.248	287.951	254.026	260.877	245.395	216.338	186.585	147.766	115.588
2011-03-11 03:06:31		0	0	0	0	0	0	0	3.82112	5.33609	4.14888	6.77958	6.0549	13.0856	19.4069	14.2034	22.1643	28.7226	25.9477	41.3016	50.1535	51.4747	69.2128	76.7587	77.3356	67.0058	88.5109	104.612	107.861	136.889	131.418	167.59	163.397	189.069	212.229	221.166	240.976	283.289	267.706	285.485	283.353	277.063	285.601	261.711	247.292	210	180.645	144.219	123.361
2011-03-11 03:21:31		0	0	0	0	0	3.32154	2.29696	3.59468	6.22436	9.95686	5.2592	11.0051	13.3694	16.1843	22.8454	26.0162	35.5083	38.499	47.699	45.7801	53.1083	59.208	74.8769	75.9593	78.0131	84.1413	93.1067	103.89	126.42	140.036	141.448	162.286	180.871	204.852	245.545	242.692	272.492	275.545	292.572	296.973	274.197	286.629	252.278	239.151	176.817	184.723	149.876	126.382
2011-03-11 03:36:31		0	0	0	0	0	1.10721	2.05429	2.86551	9.78144	16.5958	11.453	13.6753	18.879	24.1054	24.9072	20.6498	26.6494	44.0676	46.6035	60.158	58.3923	56.1503	62.6657	65.2596	78.9282	99.3221	109.745	113.932	115.608	135.152	146.14	158.79	178.688	194.281	233.752	255.851	257.907	284.533	289.169	283.367	283.143	253.844	249.755	232.286	201.719	164.481	144.91	131.767
2011-03-11 03:51:31		0	0	1.39061	0	1.19275	1.10731	1.02722	3.82074	3.55708	4.14894	10.6872	11.9626	11.6124	13.6341	13.8039	16.7619	23.8253	35.1247	37.7237	48.8189	54.1455	57.3917	67.0478	83.4333	92.5981	90.0631	97.5151	100.141	114.165	126.265	135.747	150.982	180.617	208.71	237.131	250.988	278.362	285.929	268.025	272.622	275.835	267.927	240.056	248.027	190.1	179.022	145.727	127.458
2011-03-11 04:06:31		0	0	0	1.2875	2.38522	5.53641	4.10846	9.11526	14.8666	20.0311	18.7506	22.5377	22.5393	24.7015	40.349	37.5901	34.7135	42.6686	42.8971	58.051	48.1532	76.4561	63.5628	72.8378	81.8474	96.0747	88.9199	112.842	113.64	118.301	144.826	150.669	169.816	199.389	216.442	227.7	258.648	289.673	259.493	280.763	268.868	271.338	236.158	200.994	201.529	148.189	130.435	115.93
2011-03-11 04:21:31		0	1.50463	0	1.28758	1.19269	9.19599	7.9033	11.462	15.3441	26.1134	25.4197	34.6455	25.9313	46.4237	44.7087	36.3974	48.892	53.8551	52.716	58.7699	68.1513	61.7994	71.0429	82.0474	91.9731	93.3013	107.006	107.755	112.664	118.953	136.925	147.896	171.979	182.318	196.218	220.968	263.49	265.767	270.871	271.574	275.066	240.517	218.061	221.553	182.803	147.57	116.899	97.8907
2011-03-11 04:36:31		1.62798	0	0	0	3.57801	11.0727	8.21657	27.6993	34.2333	35.8167	39.4288	52.9772	56.3138	62.3112	54.2487	56.5471	59.3692	53.849	67.9513	69.0923	77.6782	76.0391	78.8439	79.6917	92.5067	103.579	117.274	91.0567	100.904	124.812	141.484	150.232	171.074	190.084	217.971	221.196	241.949	247.312	291.444	287.115	262.602	253.479	245.645	199.303	186	147.718	119.159	113.317
2011-03-11 04:51:31		0	0	1.39037	1.2875	2.38558	6.64397	13.3536	20.5635	32.6692	33.8029	44.3462	51.3381	46.0734	56.8064	63.0077	62.8199	54.0131	53.7548	58.9933	67.0212	61.3122	79.1497	73.2862	85.3558	91.8641	98.1067	89.4494	117.863	120.348	124.726	131.865	160.064	194.581	205.829	217.841	240.399	244.996	275.663	271.538	275.004	270.928	232.769	222.316	213.241	168.979	156.629	131.124	117.859
2011-03-11 05:06:31		0	0	0	0	0	2.21448	9.24442	19.8288	16.4463	26.6554	27.981	30.2788	38.5003	43.9692	40.0571	40.3231	49.7317	59.7006	51.3077	59.1077	67.099	69.2378	64.2763	82.4603	87.0167	98.1667	106.748	120.504	118.403	124.986	145.495	161.675	185.841	191.17	214.383	241.591	252.22	269.161	273.423	282.822	253.758	241.535	238.434	215.867	186.875	159.646	132.296	114.383
2011-03-11 05:21:31		0	0	0	0	1.19265	0	5.13506	8.59651	8.00321	14.1069	20.492	22.9511	24.5109	20.4405	36.7266	38.8442	37.109	46.0798	49.3849	55.7849	61.3	73.2747	76.3202	79.0792	81.8064	78.3199	99.7615	102.054	109.563	152.833	140.717	158.053	189.074	194.287	219.255	233.289	245.599	259.888	256.925	267.871	260.737	243.299	225.641	207.37	190.142	162.43	136.574	116.271
2011-03-11 05:36:31		0.914946	0	0	1.28748	2.38522	5.53619	5.13561	6.47548	11.7566	12.4477	14.3675	21.2504	22.3844	25.3831	20.9359	32.0577	35.0048	42.6369	51.4657	49.9535	61.0811	60.5452	67.5016	76.0151	77.0096	76.3801	108.842	100.615	106.109	110.558	132.947	157.33	190.839	201.506	225.02	243.816	268.64	267.997	274.295	294.029	279.84	244.79	221.021	201.961	178.241	158.075	127.218	110.197
2011-03-11 05:51:31		0	0	0	1.28764	1.19263	4.42865	3.30106	5.52712	8.23808	13.6124	13.1264	19.5097	19.3768	16.4928	25.4111	30.1214	38.9638	39.283	47.3833	43.9442	47.5144	67.5529	80.3163	78.5804	70.8436	91.9359	102.507	109.178	114.796	118.689	132.097	150.765	174.287	197.178	204.585	242.947	248.826	277.41	285.248	287.568	272.438	228.105	239.423	212.722	182.782	161.23	130.246	110.505
2011-03-11 06:06:31		0	0	1.39032	1.28766	1.19257	2.21414	4.10856	6.68635	8.89228	14.936	15.1317	12.0872	26.36	18.4812	26.8982	33.0824	34.092	46.3497	47.0885	51.2253	62.6439	63.2375	68.5163	77.2904	83.284	91.467	95.0119	110.762	114.781	110.749	128.49	159.822	161.588	188.301	228.816	240.846	251.817	281.268	277.566	278.866	264.489	249.091	237.688	206.769	193.786	164.239	126.066	106.739
2011-03-11 06:21:31		0	0	1.39053	1.28742	0	2.21414	4.10853	9.55151	14.4555	14.4678	26.1695	24.3013	28.1577	26.2782	27.985	37.7599	42.592	35.9436	48.0997	57.5622	62.5862	68.3074	77.6635	76.6468	74.566	93.8708	105.441	109.209	125.046	123.292	150.944	183.652	170.923	207.001	236.448	248.71	267.762	278.402	301.598	268.436	274.728	259.503	244.696	213.964	188.317	150.447	157.372	115.899
2011-03-11 06:36:31		1.62788	0	1.39022	0	0	6.64308	11.2985	22.6911	24.4836	28.3075	41.1208	40.5747	49.7785	39.5304	46.3	48.8308	54.3901	54.1849	50.1526	57.1478	69.734	72.351	96.9612	83.3904	88.8756	90.3106	98.1314	104.981	112.965	133.331	140.625	153.129	185.312	186.45	241.2	239.657	249.639	275.727	282.442	282.646	266.657	254.712	261.538	231.538	191.302	165.264	139.283	124.035
2011-03-11 06:51:31		0	0	0	0	1.19251	4.42856	6.16292	15.2837	18.1944	27.5765	25.4647	23.2033	32.6269	37.5837	39.7644	36.092	36.6606	49.7955	56.6433	58.7212	62.3503	68.4234	78.6359	90.8638	86.1478	99.4801	100.348	109.287	114.471	112.202	148.786	162.035	187.694	204.776	210.531	246.44	247.8	266.064	282.12	274.966	270.555	256.294	219.082	220.854	184.457	166.156	139.397	107.914
2011-03-11 07:06:31		0	0	0	0	3.57808	7.38253	10.6129	15.2831	14.2271	28.8215	27.0256	34.1458	33.7208	48.2112	46.2054	60.4683	49.416	46.9654	49.1391	53.4753	66.2103	63.0026	76.4753	90.5234	88.7462	100.88	96.4032	111.627	133.428	135.064	154.571	172.674	185.921	193.566	226.31	229.774	264.501	244.255	283.636	287.324	272.146	261.484	221.19	242.612	177.903	163.454	126.749	107.889
2011-03-11 07:21:31		1.62776	0	0	0	7.15622	3.32176	9.24458	12.418	21.3425	27.9555	31.5666	39.1683	44.2872	50.4994	42.7817	48.208	51.576	56.7244	54.5679	67.1542	70.1516	76.5256	74.1766	75.3994	85.5654	82.7465	113.11	105.426	112.619	125.979	134.517	163.56	185.285	206.021	209.926	234.802	241.418	251.53	245.258	279.715	268.073	240.627	232.534	203.776	199.507	158.347	127.812	115.585
2011-03-11 07:36:31		0	0	1.39053	0	0	1.10733	5.13574	5.73135	12.4498	19.0859	19.1312	24.988	21.145	26.0581	41.3827	35.0782	37.5061	43.9593	59.4535	58.1179	69.3901	68.8333	72.9721	77.5096	91.3846	90.4583	95.9093	109.076	115.126	125.391	132.466	140.976	158.598	182.093	201.42	229.721	253.922	234.485	268.73	267.468	254.127	255.348	227.576	198.508	191.769	141.833	130.271	110.521
2011-03-11 07:51:31		0	0	0	0	0	0	2.05445	5.73138	8.89356	5.80897	15.7886	18.4157	17.1372	19.5998	23.8966	43.7196	30.1386	39.0394	50.7849	55.0731	46.8321	77.3593	64.8093	89.434	73.1878	86.5465	89.9103	99.784	114.237	104.875	126.18	147.592	160.849	188.339	193.53	206.492	239.285	247.779	258.59	257.041	245.272	245.657	220.599	187.518	173.001	149.774	115.066	97.1183
2011-03-11 08:06:31		0	0	0	0	0	1.10743	1.02726	3.82103	7.27869	11.4656	10.5169	12.7864	20.629	21.8253	25.9431	29.9479	35.2929	46.0824	37.9135	49.1804	56.5878	55.1612	68.5885	71.1766	83.3087	86.8112	100.055	97.1776	118.109	145.046	132.656	149.493	146.983	173.824	190.495	212.841	244.471	226.124	246.819	267.838	244.948	239.215	210.445	200.327	187.043	166.821	128.346	102.088
2011-03-11 08:21:31		3.25599	1.50489	0	0	0	2.21471	2.05469	2.86587	5.33603	7.4691	8.11205	11.8068	23.8754	23.9962	32.2644	38.2881	40.5462	43.4349	52.5987	50.7529	61.466	57.1599	62.1891	84.817	86.6679	86.9199	97.8721	100.94	109.012	128.98	132.929	141.05	170.164	186.606	176.841	210.056	219.84	222.498	262.186	269.902	274.021	239.125	213.402	207.995	169.77	133.479	127.105	103.307
2011-03-11 08:36:31		0	0	0	0	0.0476782	1.06296	9.24458	2.86569	6.22516	7.46801	5.89529	17.2426	18.0338	21.495	29.5939	35.5446	30.9195	26.7392	46.8141	54.0346	60.7061	68.0663	69.5638	77.3965	85.5282	91.6808	79.1167	94.9237	106.953	117.453	135.479	150.447	145.477	172.814	196.358	179.702	234.962	240.09	257.071	247.36	246.45	223.412	218.193	196.214	176.398	136.941	125.643	108.264
2011-03-11 08:51:31		0	0	0	1.77097	0.744994	0	3.08161	1.91046	5.54516	9.76279	12.0385	15.3345	24.7839	24.0296	22.8341	32.4744	42.591	45.5263	41.5138	47.4705	63.425	69.7423	71.0638	71.9125	84.0003	95.5455	106.348	105.648	99.8571	110.002	125.35	123.291	160.202	173.968	184.503	200.547	211.298	232.921	276.422	261.833	237.895	235.743	212.033	193.163	162.534	138.998	123.88	102.051
2011-03-11 09:06:31		0	0	0	0	0	1.10741	1.02736	2.86603	4.4466	4.97936	8.94958	10.4365	13.1617	26.6258	36.3131	31.4433	30.1456	47.5391	44.7859	57.5872	58.6215	52.7724	75.0644	76.2401	83.7202	101.291	84.116	98.6894	94.0696	101.348	121.871	154.309	145.07	173.928	186.809	221.807	221.354	232.152	254.533	275.319	253.354	232.846	210.529	198.792	165.124	139.908	110.202	97.1256
2011-03-11 09:21:31		3.25612	0	0	0	1.19283	1.10739	1.02736	0.955308	4.44683	10.7888	11.2608	11.182	15.2065	26.4862	25.9974	32.7465	28.7646	46.0375	46.1301	56.8731	61.3699	66.9478	66.4548	73.6385	79.3397	85.4381	100.891	113.113	105.509	116.829	151.05	136.155	138.806	175.004	188.011	197.658	211.596	224.03	268.217	246.342	246.404	234.996	214.405	201.903	171.328	139.826	119.697	95.9708
2011-03-11 09:36:31		1.62813	0	0	0	0	1.10741	3.08205	2.59359	2.03265	8.8184	12.4636	13.6161	15.5481	17.2121	26.1094	27.5739	43.2558	40.3878	46.1087	59.9208	51.5324	65.6756	71.7689	76.5532	79.7997	96.7202	102.193	85.0003	96.2199	112.121	142.354	133.686	140.947	173.566	197.266	187.708	211.246	236.02	265.359	242.572	264.437	253.728	223.858	198.283	153.736	142.059	123.67	99.0689
2011-03-11 09:51:31		1.62795	0	0	1.2878	2.38574	0	1.02732	4.77673	6.40478	7.30237	10.5243	7.47641	18.9023	20.6362	22.6084	30.6352	33.1103	32.0465	48.9744	55.2272	66.2753	55.6141	81.0231	76.716	80.9548	85.5436	99.234	97.1359	108.006	122.146	138.407	130.933	143.99	167.244	190.563	192.221	218.75	246.665	256.2	267.512	252.598	226.522	212.26	181.695	166.713	145.713	118.021	100.957
2011-03-11 10:06:31		0	0	0	0	0	0	5.13696	1.91084	4.44712	8.30022	12.0043	16.372	15.5058	23.2474	21.9275	35.7721	35.6202	39.5381	39.2885	49.3048	51.2551	68.6462	75.3978	90.8378	67.6353	91.2035	98.841	98.9494	103.513	130.279	129.95	138.792	164.721	157.41	188.766	207.973	210.381	232.931	270.739	287.368	254.81	253.035	222.626	210.607	171.823	136.566	105.129	95.9692
2011-03-11 10:21:31		0	0	0	0	0	1.10763	1.23055	0.766526	2.66817	9.96029	11.3776	11.8736	15.4487	22.6281	23.1847	29.9772	27.597	33.9119	39.8593	41.8907	68.2032	68.2417	66.599	72.8644	90.8878	80.6696	99.5596	98.2269	108.544	109.827	128.153	144.357	141.761	169.97	181.4	213.86	222.696	240.581	278.237	253.37	249.117	240.066	211.066	205.705	156.564	143.219	122.54	96.7423
2011-03-11 10:36:31		0	0	0	0	0	0	3.08253	2.86659	3.55811	4.65045	8.53606	13.3354	14.4126	22.3972	32.1292	37.2186	30.4541	33.8631	49.9471	38.417	49.5891	71.4058	75.7013	70.7663	78.1619	93.5692	96.7228	100.459	92.4256	105.027	126.596	139.455	136.29	181.12	187.458	202.686	222.173	221.196	267.358	255.963	268.017	249.067	229.141	191.07	171.553	136.663	120.899	98.7571
2011-03-11 10:51:31		0	0	0	0	1.19297	1.10747	0	2.86637	4.44731	4.9799	9.79058	15.453	12.517	24.3732	17.0891	25.7448	34.8516	43.1532	45.7218	64.7846	51.942	58.6455	70.083	78.4955	78.9228	89.3032	96.3564	101.963	92.4872	112.557	104.805	136.611	150.086	170.507	178.806	212.582	229.483	230.146	258.363	252.308	254.373	216.683	207.686	190.461	149.175	147.64	114.732	92.1881
2011-03-11 11:06:31		1.62833	0	0	0	0	2.21514	1.02748	1.91078	8.89478	10.7898	11.3319	14.9762	17.7928	14.6909	24.764	32.4747	33.0657	40.4689	53.1689	46.5253	62	53.2401	73.0013	71.266	71.6734	79.2109	99.3933	89.8346	113.599	110.126	130.194	152.52	151.274	170.221	175.264	192.532	217.801	234.646	253.474	245.064	229.892	251.46	207.216	185.277	172.083	142.296	122.791	89.0372
2011-03-11 11:21:31		0	0	0	0	0	0	2.05483	2.86622	1.77895	5.80981	8.99356	19.0791	14.0587	24.6596	27.5471	26.5781	35.8356	33.717	49.0817	49.9032	63.2141	64.4968	66.6776	83.4208	81.8484	81.5721	91.3603	96.2067	102.027	93.416	107.588	140.116	131.334	158.127	164.383	199.341	222.704	224.243	262.594	262.196	246.35	234.699	207.548	181.286	169.962	135.467	109.148	92.9628
2011-03-11 11:36:31		1.62817	0	0	0	1.19295	1.10755	1.0274	5.73282	2.66853	9.95987	12.9573	9.66353	21.0693	25.39	26.6572	21.3628	32.6782	42.2654	50.8394	53.0516	59.7247	58.1349	74.5327	78.4997	87.5333	80.9212	89.0811	86.9612	101.385	108.494	115.767	124.535	146.008	170.871	189.686	192.896	217.152	245.878	260.15	261.196	238.516	242.738	214.886	200.984	165.703	133.195	103.47	93.7083
2011-03-11 11:51:31		0.915324	0	0	0	0	1.10755	1.02744	4.77753	9.21013	10.4971	16.7097	14.0496	16.247	23.1897	27.2981	30.9956	34.8337	44.9471	43.291	54.7538	54.4801	54.8936	72.941	73.0952	79.3122	92.5026	86.1981	102.361	104.881	109.468	120.833	131.44	146.657	172.837	176.887	214.676	226.867	211.567	256.859	247.969	242.388	224.79	202.456	201.735	150.232	139.293	112.73	82.1708
2011-03-11 12:06:31		0	0	0	0	0	2.21545	4.11016	0.955609	5.46324	7.85179	10.8121	12.7598	13.0893	21.0411	25.8244	26.0511	36.5221	37.492	42.251	57.3885	52.9125	66.9683	63.7971	70.108	74.991	82.8106	114.545	105.796	104.491	105.981	121.695	112.203	137.756	158.327	191.625	202.131	230.521	253.171	260.918	257.913	251.673	231.044	211.987	170.353	150.329	149.401	111.709	87.2253
2011-03-11 12:21:31		0	0	0.915744	0.440003	0	0	0	1.91114	1.77915	12.4517	8.96574	16.0255	19.6195	19.2623	22.897	30.2468	45.3891	44.7833	49.6337	49.449	49.8513	55.2298	60.8346	74.9692	88.4099	92.5699	95.2167	94.1301	114.548	115.756	131.689	128.035	157.662	157.228	172.34	211.619	201.569	214.113	254.159	253.165	232.696	237.434	212.013	193.253	174.529	137.995	111.693	93.1205
2011-03-11 12:36:31		0	0	0	0	1.19335	0	1.02753	1.58682	3.86077	7.19032	12.3458	8.17308	13.9251	20.0935	23.2895	28.9844	43.5657	35.6513	45.599	47.6696	67.5365	57.4042	67.3272	71.1657	82.7038	95.674	95.6708	96.0452	93.167	106.283	126.338	125.11	149.014	172.149	192.502	217.448	230.533	239.99	260.128	262.474	253.423	242.238	203.656	200.465	182.179	139.631	117.504	86.949
2011-03-11 12:51:31		0	0	0	0	0	0	1.1539	3.70554	5.33833	12.8937	10.1303	16.1645	13.5838	22.5563	26.8664	28.1905	36.1112	34.8702	48.424	46.6824	56.3561	64.0772	71.0179	75.5696	88.2138	79.0779	90.4221	102.746	95.6003	96.0766	128.447	128.099	130.907	176.843	177.229	202.25	205.815	246.492	270	262.979	259.625	217.877	210.108	177.444	157.46	136.396	119.408	78.1119
2011-03-11 13:06:31		0	0	0	0	0	1.10775	1.02753	0	2.66893	5.81131	6.66551	17.3099	13.9014	19.1122	20.3135	27.9253	30.65	41.7535	55.4849	59.5981	58.8208	74.0574	67.1577	75.7987	82.8897	87.9971	90.9753	98.4388	107.169	97.425	112.304	134.187	162.744	144.317	167.426	197.202	211.971	226.653	238.073	259.72	232.708	239.619	199.736	177.204	161.719	125.579	118.104	99.4987
2011-03-11 13:21:31		0	0	0	0	0	0	1.02774	3.82301	7.11804	5.81199	4.31189	13.3338	21.2561	23.2921	23.4944	38.4625	40.0051	54.3212	61.4458	60.6702	60.4029	83.7827	77.7288	82.6962	84.7308	100.433	100.972	110.196	96.2462	109.011	140.487	145.541	146.322	165.541	170.365	199.207	233.754	222.927	262.28	252.686	251.887	230.396	188.818	195.541	150.791	125.95	93.5247	84.9109
2011-03-11 13:36:31		0	0	0	0	0	0	0	0.955849	5.33859	4.57288	9.47811	14.0471	15.5576	26.1192	27.7809	25.5495	32.076	43.4413	45.6705	57.7449	67.3369	59.9654	71.3054	66.599	86.4221	90.6016	95.7856	96.1776	97.3115	108.654	125.963	141.06	137.073	172.54	178.602	186.406	211.479	247.154	246.691	247.366	254.377	224.074	205.168	180.004	167.923	157.212	110.73	82.6474
2011-03-11 13:51:31		1.62881	1.50551	0	0	1.19329	1.10783	1.02771	3.82298	3.55917	8.30308	11.8247	11.3533	18.4059	23.7466	28.7107	33.691	30.637	48.2545	50.9119	37.5955	66.8144	67.8407	69.4753	85.3894	81.9003	100.879	99.2721	96.4776	104.715	104.773	122.658	143.798	144.728	142.462	175.609	191.32	221.286	225.753	259.385	239.533	253.686	214.048	215.379	195	160.741	130.162	108.259	94.0801
2011-03-11 14:06:31		0	0	0	0	0	1.10797	2.05579	0.955929	6.22907	4.54455	15.7155	7.60535	17.1935	18.3454	23.3037	25.8868	32.9625	35.0292	44.0737	53.0436	49.7641	67.3968	72.1269	89.9644	80.0151	77.3801	92.2147	86.9593	101.77	105.389	132.063	134.487	150.855	163.848	207.184	182.282	216.729	243.64	245.311	249.399	225.793	232.656	218.155	171.556	161.522	133.712	114.305	93.8683
2011-03-11 14:21:31		0	0	0	0	0	0	2.05581	0.955968	6.22923	9.96433	15.1685	15.0113	15.0977	23.5092	15.9122	20.4175	36.4532	36.1869	36.741	43.5814	50.0955	61.867	73.3096	79.4785	81.1824	91.1872	86.2449	95.2667	86.6337	103.791	111.886	129.84	157.56	159.766	184.143	207.302	220.383	227.146	240.002	260	228.546	226.1	204.479	187.734	161.781	131.999	110.148	92.683
2011-03-11 14:36:31		0	0	0	0	1.19351	0	2.05569	1.91182	7.16224	6.60272	9.77516	14.7452	18.9934	16.1352	31.0152	27.523	34.0356	34.3115	52.5292	56.4997	51.1798	66.241	72.591	69.7176	81.1644	85.8692	85.1776	94.8147	102.504	98.4817	103.938	131.943	137.777	155.18	186.132	200.393	219.609	243.003	247.502	265.154	245.152	228.804	207.953	178.394	149.427	136.05	91.4208	77.9538
2011-03-11 14:51:31		0	0	0	0	0	0	1.02795	1.91194	2.66979	4.52885	10.7694	12.1399	12.5485	16.1466	27.9814	32.6288	35.2215	49.3997	32.6327	50.1606	54.1728	54.6234	62.3599	58.8112	83.1875	86.4244	103.662	88.9346	95.0753	105.765	118.021	132.546	146.064	156.146	163.253	191.448	210.06	247.015	241.466	258.095	243.604	241.118	215.915	179.425	159.205	131.38	108.63	81.158
2011-03-11 15:06:31		0	0	0	0	0	1.10821	2.1467	4.69519	7.11926	6.64362	12.0827	13.3912	11.7625	22.4716	20.9862	29.3115	33.2606	35.1394	42.7	45.224	53.5856	71.2333	63.9929	72.9218	66.3913	68.3609	90.1522	100.824	102.025	108.319	99.1862	128.347	156.875	157.662	163.892	193.748	220.735	225.288	257.189	267.943	251.332	228.145	197.416	185.393	149.032	110.616	80.3401	86.824
2011-03-11 15:21:31		0	0	0	0	0	2.21635	2.12608	1.8467	0.930702	6.98737	12.9398	11.565	17.6571	12.0889	21.3033	24.5619	28.3003	40.9365	41.9776	51.7372	52.6804	61.3189	62.7962	65.5804	76.0106	74.3288	82.6237	93.5244	100.978	101.173	113.719	125.415	149.964	146.31	173.169	199.998	202.308	217.772	239.363	253.754	235.949	219.577	211.382	153.824	161.056	119.805	91.9292	93.9231
2011-03-11 15:36:31		0	0	1.39162	0	1.19375	0	0	0.955968	0.889862	5.8134	12.773	14.7276	20.5309	14.6735	32.2766	36.9942	35.0997	40.8372	40.4821	44.8869	47.3	63.0574	67.8615	63.6551	77.4167	83.3606	84.0196	96.6881	101.388	106.903	107.581	129.922	144.918	169.493	176.026	190.873	216.358	237.426	247.51	246.404	249.016	226.048	195.617	164.415	144.876	119.05	105.65	79.8712
2011-03-11 15:51:31		0	0	0	0	1.19371	0.552744	4.62769	2.46683	3.93394	6.64474	9.02631	12.0241	18.8644	20.1677	23.7344	25.3093	31.6068	42.1788	38.1869	56.8506	62.0612	49.9497	62.9942	76.7894	74.8715	85.2147	82.199	99.2179	98.6599	111.625	117.529	127.573	148.355	166.274	165.543	201.486	212.999	237.721	249.03	243.354	244.914	231.046	208.235	178.151	144.138	125.809	111.185	86.0442
2011-03-11 16:06:31		0	0	0	0	0	2.21621	1.1164	1.82967	5.34	7.47429	6.63853	9.63208	13.0888	18.917	19.648	35.9426	40.5631	39.9269	39.7606	53.4292	60.1564	60.551	70.9929	61.2583	64.4202	82.1795	102.033	88.1468	104.271	111.362	120.79	123.816	154.824	165.388	183.099	211.398	214.579	239.469	234.612	235.304	246.747	212.015	194.173	169.253	149.828	126.503	100.07	87.1647
2011-03-11 16:21:31		3.25827	1.50597	2.78327	0	0	0	3.08405	0.95601	5.37022	8.27683	10.4001	13.9979	18.4016	23.7955	27.2983	41.051	35.267	37.6189	46.4792	50.8263	55.0712	55.7138	74.2442	66.6516	79.5388	80.0388	92.4154	95.0365	90.2554	109.744	120.987	131.601	145.968	149.818	173.071	204.779	215.617	229.784	231.476	248.237	257.859	225.902	199.293	183.063	160.25	117.112	92.4747	77.2654
2011-03-11 16:36:31		0	0	0	0	0	0	2.05613	3.8241	3.56035	8.66881	14.0873	8.51151	27.0274	27.1855	25.0477	27.9665	33.291	29.0433	48.8949	48.1846	50.175	71.6381	69.4939	74.1686	68.4096	78.5484	86.4577	96.5058	94.7413	124.588	131.041	121.394	147.877	164.952	160.284	192.342	205.507	230.26	255.537	263.812	252.67	232.999	188.413	199.902	146.212	142.152	108.063	83.9651
2011-03-11 16:51:31		0	0	0	0	0	2.21641	0	0.955949	2.69523	4.95949	8.11814	14.1869	15.9919	23.6657	29.976	29.2191	41.6266	32.6567	42.9279	54.7042	59.1131	63.5013	66.0144	69.9215	71.2029	84.4237	89.9913	80.2436	104.188	114.97	121.213	128.233	134.8	147.514	178.744	186.4	203.418	233.153	265.679	242.832	233.073	224.122	218.568	185.495	148.714	125.232	106.855	81.4103
2011-03-11 17:06:31		0	0	0	0	1.19361	0	4.11192	2.86797	4.49288	14.0773	9.79449	12.604	12.4391	24.3487	31.8818	29.119	31.4355	40.7202	40.9369	51.5404	62.7288	62.1298	71.3907	67.9042	78.1625	86.508	99.3429	90.2051	99.3083	103.072	121.263	129.647	146.679	148.027	175.431	180.036	237.223	241.416	257.32	245.364	259.019	236.48	190.819	185.058	144.323	116.854	109.113	87.8327
2011-03-11 17:21:31		0	0	0	1.28846	2.38714	0.572035	1.52516	5.73548	5.33929	17.0129	19.1558	15.5953	27.5735	32.9997	35.8375	43.9849	41.4901	42.9202	45.1167	52.3054	58.591	55.9958	69.2891	73.0317	81.0667	93.9923	92.0535	100.318	101.092	103.92	111.663	134.485	160.737	164.944	176.645	214.383	202.091	243.926	250.878	241.514	252.274	216.12	195.603	175.208	165.497	135.819	100.883	82.5516
2011-03-11 17:36:31		1.62904	0	0	0	0	1.10811	6.16747	6.69144	15.1741	18.2263	24.2196	37.1106	42.7917	47.549	40.4971	41.7468	52.7285	50.9644	56.4301	63.0859	48.0186	69.226	74.8913	78.4253	78.6558	103.218	97.3016	96.9587	100.315	114.801	116.913	138.057	145.074	164.481	163.409	217.856	228.195	233.968	258.876	265.389	248.167	230.501	187.682	187.494	160.649	133.84	113.787	79.5801
2011-03-11 17:51:31		0	0	0	0	1.19349	0	4.11151	3.82353	5.33968	6.20247	15.3574	15.9221	18.0081	18.1526	35.6458	29.5891	33.2519	39.9705	47.8779	56.1788	54.7478	64.0439	63.2006	74.0087	74.3615	74.7936	82.825	112.775	103.801	99.9196	112.474	119.437	138.592	149.567	162.009	199.09	190.092	229.942	246.414	262.714	267.484	240.501	210.387	191.39	160.367	120.166	102.047	87.7471
2011-03-11 18:06:31		0	0	0	0	0	0	0	2.86755	5.33913	2.06883	11.7021	11.9556	12.2137	15.6405	28.4782	29.1438	33.7375	34.1577	44.2433	43.2647	48.8506	62.9763	57.5404	75.4849	85.6753	79.6926	88.3503	97.841	99.4635	99.675	106.529	139.71	141.18	140.725	172.332	194.776	208.936	208.271	259.511	268.243	258.712	239.71	192.258	186.188	146.703	122.456	110.74	91.4946
2011-03-11 18:21:31		0	0	0	0	0	2.21593	1.02779	1.91166	8.08237	9.06429	15.9185	7.61253	17.8782	22.2489	25.2296	23.5709	39.8029	38.3051	50.4554	58.1221	57.7843	58.7458	62.0513	63.8103	79.4362	89.1574	99.6689	94.7567	95.7558	102.8	115.82	106.629	143.462	184.517	183.107	199.03	216.254	241.264	240.453	220.387	239.487	214.852	201.194	181.216	154.237	134.886	112.278	87.1516
2011-03-11 18:36:31		0	1.50565	0	0	1.19345	0	3.08375	4.7791	2.73339	9.07426	5.7833	14.1786	18.2416	20.6798	31.0096	28.1348	38.784	39.2978	43.4798	49.5628	47.2487	57.8753	55.3776	71.1026	75.925	89.3545	92.0756	86.7734	94.791	104.013	99.2356	124.189	131.097	157.123	177.438	177.951	222.338	223.209	253.748	234.916	255.607	241.633	202.56	200.168	154.798	133.992	99.7356	75.7631
2011-03-11 18:51:31		0	0	0	0	0	1.10801	0	5.7349	3.55933	6.64247	7.3716	12.0599	9.39115	21.9535	26	30.258	32.974	38.866	43.6006	48.5205	56.8571	55.4196	63.9288	71.5587	65.3587	87.9333	80.4154	92.7897	92.8955	125.477	108.294	130.839	129.75	168.702	167.229	200.12	203.355	238.502	231.446	241.821	245.891	221.082	182.608	169.84	160.787	123.834	95.551	89.4548
2011-03-11 19:06:31		0	0	0	0	0	2.21575	3.08317	0.95575	7.11808	5.81179	13.509	13.9158	18.3694	23.4806	28.0723	40.1551	40.6696	38.9487	42.9333	47.3301	64.4423	57.0035	64.201	71.4837	67.6067	66.3571	90.6295	89.6628	101.481	111.496	118.754	130.304	160.391	148.49	185.23	195.196	210.879	226.118	247.903	247.47	246.028	211.004	192.163	184.379	144.691	127.358	103.031	79.9657
2011-03-11 19:21:31		0	0	0	1.28842	0	0	5.1392	5.73526	9.78801	14.5432	17.7151	19.9301	30.4938	32.0038	26.5611	36.0138	33.0837	47.9218	43.9763	47.6827	50.3728	56.8215	73.0606	76.5708	76.0872	83.2288	91.9478	90.3558	104.74	108.4	120.631	138.299	137.71	147.695	173.642	202.841	209.704	247.518	245.691	254.083	240.433	222.498	214.966	178.237	161.556	121.394	102.268	85.7458
2011-03-11 19:36:31		0	0	0	0	1.19343	0	3.08343	5.73481	5.45705	9.46625	16.2284	23.0907	24.6268	34.2314	37.9939	37.6801	36.9506	43.9862	45.3814	56.0462	51.7917	63.1276	69.3212	73.766	80.6542	87.7019	75.751	101.777	102.697	102.374	117.513	141.294	147.119	142.738	176.106	197.999	213.634	232.065	257.478	244.235	234.876	244.665	217.652	184.585	147.224	124.435	111.573	88.75
2011-03-11 19:51:31		0	0	0	0	1.19335	1.10787	1.02777	4.77875	11.5666	9.13317	12.1	19.0949	26.9681	28.4403	28.6799	27.5675	34.4394	53.7522	44.9122	55.9978	58.8045	60.801	74.7795	71.699	77.9837	83.1913	94.8183	93.5115	94.891	114.998	116.909	140.451	146.775	170.062	171.873	189.646	212.598	237.452	238.512	250.669	247.62	235.222	197.51	171.28	165.335	140.537	87.2314	84.1183
2011-03-11 20:06:31		0	0	0	0	0	0	2.05559	6.69048	5.33856	12.4545	12.6572	17.0559	21.5791	27.4349	32.1984	39.0096	40.0734	42.7045	43.951	65.4949	57.4753	63.501	62.6478	77.0788	77.4978	77.3263	96.5304	95.3686	104.131	95.8058	121.158	136.592	145.531	154.321	168.137	189.902	206.328	225.242	258.854	259.427	238.536	233.397	201.026	175.879	143.696	123.812	103.826	90.7529
2011-03-11 20:21:31		0	0	0	0	1.19337	3.32391	2.05561	4.77904	6.30285	17.8017	16.1682	26.3311	23.885	31.0571	28.6398	34.2061	42.9269	51.7135	55.7231	65.7167	63.4183	66.3071	71.1792	63.4997	79.0772	81.7577	83.8154	94.542	103.556	120.461	121.078	141.991	137.27	151.172	165.543	200.713	217.897	236.757	249.952	272.795	262.212	220.253	207.029	175.066	164.273	116.524	95.3747	79.0202
2011-03-11 20:36:31		0	0	0	0	0	1.10801	2.05549	10.5137	10.7569	8.22923	18.8722	26.4988	34.7545	35.6003	39.1327	37.2551	39.9269	46.9042	54.2119	45.2497	62.9112	59.0522	71.7433	67.3869	77.1391	77.6923	95.6907	102.866	98.2436	114.251	113.421	126.506	139.301	164.205	192.36	190.525	221.919	240.719	270.05	254.623	235.066	233.86	206.102	191.519	139.612	125.621	106.338	95.3532
2011-03-11 20:51:31		0	0	1.39123	0	0	1.10797	4.11144	6.69087	8.00833	7.05635	18.5234	18.6021	21.4771	22.846	31.0271	33.9362	33.391	49.1035	48.1878	41.9769	47.0772	57.7439	66.3609	57.8785	78.5179	89.1997	79.3731	90.9455	109.465	105.473	122.247	119.304	145.05	152.362	171.22	182.063	200.182	230.13	225.304	249.281	242.532	219.513	195.431	190.907	165.058	134.501	107.45	78.4234
2011-03-11 21:06:31		1.62875	0	2.78259	0	0	0	7.1941	4.77904	2.66929	12.455	11.9574	22.5665	18.1717	21.9317	22.383	40.2583	45.0689	49.3875	44.375	55.9426	53.2936	66.1603	66.8263	66.6413	76.3279	85.8827	87.3327	96.599	111.861	120.556	124.099	130.577	163.005	164.938	150.493	206.673	217.194	225.491	257.508	249.377	259.678	225.717	192.025	188.017	157.226	136.679	101.497	89.1904
2011-03-11 21:21:31		0	0	0	2.57662	3.58019	2.21585	3.08329	3.82295	6.2284	7.89965	14.4754	22.8489	22.5278	32.2208	39.8821	40.666	37.3567	50.2256	34.9913	47.2474	46.9317	57.7519	58.9705	68.0756	83.9577	75.4923	101.974	96.3843	100.101	113.686	126.506	124.044	138.75	149.006	170.411	206.793	224.834	233.644	254.866	234.467	249.563	224.035	207.488	182.125	166.192	126.158	104.458	93.4429
2011-03-11 21:36:31		0	0	0	0	2.38694	2.21607	2.05569	0.955891	5.33878	11.6246	9.70503	16.1548	19.8685	21.1212	25.9014	33.6615	36.7321	31.973	44.2929	50.4516	57.0731	59.7827	66.0218	68.233	75.5821	86.9821	99.409	96.1109	97.8074	98.2481	114.368	123.974	149.283	161.601	150.687	197.997	195.793	230.719	247.089	259.008	250.184	221.893	214.485	180.262	163.69	135.559	109.421	89.5558
2011-03-11 21:51:31		0	0	1.39133	0	0	1.10791	0	0.955811	5.41083	8.23615	9.62625	13.3866	16.2062	25.0849	23.7051	30.6021	43.5426	32.9304	50.6833	43.9689	57.3394	66.9381	60.8657	74.9779	82.2936	68.9346	101.519	90.2391	104.645	105.196	124.623	115.048	146.807	172.179	183.866	193.808	226.278	246.013	243.37	230.487	257.165	239.008	204.305	178.836	163.872	144.868	105.524	91.999
2011-03-11 22:06:31		0	0	0	0	0	2.21572	0	0.955728	4.44856	7.47228	7.38551	15.4448	21.1363	19.558	23.4976	37.5798	35.4192	37.1022	42.6356	62.9971	53.3657	63.6673	68.2535	67.5853	67.5282	86.2628	81.5343	92.209	100.686	117.411	113.541	127.937	136.574	147.596	168.345	200.781	218.447	246.192	242.861	236.937	220.409	221.869	212.472	172.458	156.558	140.495	123.776	89.2667
2011-03-11 22:21:31		0	0	0	0	1.19329	0	2.18433	4.65913	8.00795	6.64253	11.2121	12.6066	10.904	21.5367	23.3323	27.5298	38.4276	36.6929	38.9	53.6862	48.3532	62.666	62.324	62.0494	89.5285	95.401	94.7176	92.2417	97.8545	99.5532	111.117	125.685	148.734	131.468	163.143	193.005	219.104	218.728	249.323	263.732	243.273	224.135	202.162	169.461	151.701	133.388	108.471	91.7747
2011-03-11 22:36:31		1.62867	1.50551	1.39119	0	0	1.10795	2.05549	2.86731	4.44885	6.64208	8.9551	15.7797	17.5362	15.9125	23.0549	22.4742	28.005	40.874	44.6045	40.7801	51.0346	66.2279	64.6708	59.9538	70.8369	81.4571	86.4481	80.7962	94.1962	116.677	101.383	135.38	156.164	176.314	181.791	187.212	220.05	215.221	234.505	240.174	234.976	225.896	202.226	187.234	159.011	141.414	97.0904	96.1304
2011-03-11 22:51:31		0	0	0	0	0	0	0	3.82298	0.889702	3.32083	7.43737	17.0745	15.568	16.604	24.3139	28.3379	33.2619	35.6936	43.6856	53.7038	46.9869	58.2138	60.0526	68.3295	80.7744	83.1087	84.4744	99.801	100.159	108.871	103.56	113.44	142.031	142.388	161.881	221.871	203.938	246.819	250.515	248.546	245.853	213.051	199.513	180.25	137.152	109.884	100.214	74.1253
2011-03-11 23:06:31		0	0	0	1.2882	0	1.10787	2.05545	3.82282	4.44862	5.81167	12.878	7.51869	16.6535	17.6543	17.7294	27.2662	31.4235	37.4365	30.1196	44.5327	46.0067	52.4141	54.3231	68.9138	70.184	86.2465	92.5596	82.7128	92.7487	101.784	109.439	139.587	142.434	149.056	177.512	187.732	205.477	237.931	251.801	244.551	226.591	217.933	210.545	176.811	143.524	130.24	110.112	79.449
2011-03-11 23:21:31		0	0	0	0	0	3.9459	1.47782	2.86705	3.55878	10.7926	4.4134	15.5178	12.2442	21.2129	24.1458	21.3249	30.7598	34.4644	40.9814	38.7856	41.3016	53.8946	65.0099	66.7372	71.1333	87.0324	92.5795	79.9519	101.098	86.8747	115.501	122.282	132.398	161.238	178.768	178.169	206.446	230.671	242.502	245.475	252.051	246.048	221.604	176.332	156.524	133.349	95.7673	94.166
2011-03-11 23:36:31		0	0	0	0	0	0	3.08299	1.91128	5.33808	3.77391	6.36282	23.7661	12.9515	15.981	24.636	27.2484	35.0657	37.6269	46.3622	62.5779	53.6901	54.8016	56.6567	58.8365	61.1122	78.3452	84.4183	101.991	98.9913	103.48	108.223	119.008	134.742	145.435	183.734	181.224	220.365	244.095	249.679	242.061	245.092	220.02	190.008	175.431	142.143	128.744	109.391	90.392
2011-03-11 23:51:31		0	0	0	0	0	0	2.05513	4.77792	1.77921	4.9808	10.4472	12.6915	15.8958	22.4916	28.9275	32.4907	27.8754	43.2356	43.6192	43.2926	51.701	54.7401	63.4212	56.9413	75.2433	76.6125	90.5535	84.9798	99.6285	112.629	112.455	129.864	142.612	157.56	174.758	176.463	218.454	227.506	255.074	247.987	255.905	237.063	209.916	181.482	154.734	133.626	98.9776	89.2929
2011-03-12 00:06:31		0	0	0	1.28812	1.19323	0	3.08285	0.955609	5.3376	5.81128	8.28724	11.8363	17.2468	22.7698	25.6627	30.8872	34.0013	41.1462	51.7321	47.5125	40.0388	54.7984	64.1183	70.4971	71.7481	71.8622	87.7888	89.4542	83.5106	97.6869	120.12	136.306	148.758	152.989	173.005	181.154	215.28	228.756	238.64	260.429	253.979	226.532	209.091	170.056	166.39	124.213	113.919	89.942
2011-03-12 00:21:31		0	0	0	0	0	1.10787	2.05535	3.82285	3.66929	4.04801	8.36176	11.9888	15.5941	18.3055	19.4096	27.4647	34.3417	33.5702	35.6862	48.0356	49.0599	60.8115	58.8272	61.9554	76.6365	82.4333	91.5304	81.4962	96.0769	93.0881	120.122	121.916	149.96	164.439	165.154	196.753	200.831	239.784	279.918	264.611	258.447	233.217	204.625	186.158	157.426	130.629	114.004	93.7561
2011-03-12 00:36:31		0	0	0	1.28824	1.19333	0	2.05527	2.86701	1.77943	10.7925	8.20029	12.8343	10.4944	21.3482	20.8123	24.5611	29.2197	30.9133	36.5103	42.1974	46.5452	58.7923	56.6112	69.8154	66.6904	82.6933	93.2971	87.2401	94.9423	112.961	111.071	122.154	141.514	156.308	178.844	187.975	213.89	233.838	234.86	250.106	237.43	237.263	200.381	177.358	163.588	140.449	121.542	89.1712
2011-03-12 00:51:31		0	0	0	0	0	0	0	1.91124	7.11737	9.96285	9.69199	18.4567	14.4013	20.5601	17.9673	34.6994	28.0955	32.275	38.775	43.149	50.109	46.2205	59.5718	62.7667	75.25	91.2686	96.0359	92.9625	114.357	109.431	119.938	124.952	132.6	161.793	170.192	202.809	214.858	215.396	243.307	250.939	248.017	229.355	188.479	206.504	162.374	138.888	118.726	94.6135
2011-03-12 01:06:31		0	0	0	0	0	0.618308	2.50942	4.77808	1.77927	5.81096	8.20167	14.1883	9.84478	18.5435	30.1002	29.2674	22.1548	37.9596	39.7708	39.7045	51.5144	60.5369	57.6811	75.5279	59.8699	72.4478	84.1949	95.4458	106.626	107.994	112.016	129.379	136.613	169.251	181.911	200.363	231.725	219.281	265.875	265.274	248.301	220.138	211.13	176.703	164.848	117.189	124.463	83.0292
2011-03-12 01:21:31		0	0	0	0	0	0	1.02774	0	3.55875	5.81125	8.87689	9.0642	16.6012	22.9737	25.65	26.9037	33.2487	40.0564	42.4753	48.3894	48.3763	49.2337	63.0519	67.5317	68.2753	88.6112	91.5468	91.0974	89.609	107.351	101.278	127.406	128.622	157.568	184.135	195.074	214.952	248.802	262.676	246.909	257.188	220.839	201.637	176.358	154.151	134.233	105.625	87.9859
2011-03-12 01:36:31		0	0	0	0	0	0	1.02766	1.91134	5.33769	6.64163	7.50183	9.66856	17.3416	18.859	19.2208	22.5445	33.4718	36.5779	45.7026	40.6247	50.774	58.4317	58.1221	62.974	82.8154	80.974	85.7202	97.2785	93.2712	105.571	107.08	122.953	140.497	163.341	193.097	188.391	206.26	237.302	248.536	252.6	237.7	220.591	196.845	190.491	158.285	124.896	105.19	84.5279
2011-03-12 01:51:31		0	0	0	1.28826	0	0	0	2.86723	5.33821	3.32103	6.64609	12.8164	16.5469	19.238	22.0002	29.9507	31.1635	36.3452	37.9994	47.9333	50.349	50.2205	59.6814	67.4587	75.2808	81.8042	90.0106	97.5904	93.5827	106.367	119.801	116.839	134.501	157.51	170.034	184.647	213.349	239.287	267.967	255.941	245.449	235.132	215.208	175.401	149.085	128.632	120.541	84.2718
2011-03-12 02:06:31		0	1.50549	0	0	0	0	2.05531	2.86703	8.89737	6.6417	7.45192	11.2077	14.5198	24.1296	30.9014	27.0322	27.4361	43.0891	36.4497	50.3077	51.3452	69.516	62.3122	70.2391	71.5311	77.609	85.1115	87.6766	92.2583	104.373	132.795	137.41	139.852	175.759	170.679	203.365	194.832	235.232	242.432	236.192	232.722	221.036	190.711	184.856	145.2	131.623	113.816	84.6484
2011-03-12 02:21:31		0	0	0	0	0	0	2.05539	2.86691	2.66899	4.15087	5.95083	12.5904	15.6662	14.7454	23.7764	29.4409	32.1516	37.5606	51.2279	49.2106	49.3939	65.1269	61.5667	62.3978	76.5853	88.6205	95.8801	95.6263	108.873	111.085	124.603	142.308	141.711	173.217	174.726	192.316	212.003	232.546	271.248	260.094	248.866	222.929	209.267	185.721	164.992	139.922	117.591	96.0093
2011-03-12 02:36:31		1.62867	0	0	0	0	0	2.05527	2.86713	4.55891	11.1425	13.1643	10.4708	13.3666	20.0335	18.1796	26.369	44.4263	38.8692	35.7003	47.5804	55.1917	60.3974	63.876	65.3705	72.8715	79.0186	102.792	92.0022	93.299	110.494	123.497	142.047	134.663	178.407	205.12	202.776	229.892	260.795	251.258	249.365	268.131	239.802	240.371	207.163	181.933	140.485	121.901	89.5869
2011-03-12 02:51:31		0	0	0	0	1.19329	0	1.02769	0.95567	4.44859	3.7666	11.5693	5.53849	13.0844	19.2881	27.4884	30.6903	32.5458	42.7869	38.4237	40.4737	52.7465	61.2554	67.8263	62.3715	72.7962	92.2401	89.8487	99.2253	111.555	112.424	129.557	155.611	175.295	190.21	202.41	227.714	258.574	271.735	274.083	279.794	266.208	266.192	229.022	190.277	188.219	159.153	136.485	119.439
2011-03-12 03:06:31		0	0	0	0	1.19341	0	0	0	4.44853	2.94673	3.975	8.95593	16.6791	19.088	22.2244	28.493	32.4256	34.9484	45.5981	46.0426	57.8997	63.6958	71.5343	71.1131	80.1804	88.2446	101.25	102.842	114.047	127.292	118.784	160.737	188.69	195.367	214.305	252.622	267.141	272.71	259.429	292.903	265.156	249.405	237.476	213.291	203.233	163.522	145.405	122.354
2011-03-12 03:21:31		0	0	0	0	1.19319	1.10779	2.05547	0.955647	4.44849	7.07689	4.72135	7.09218	4.76824	13.5327	24.77	20.9752	32.2494	33.6391	38.9471	43.1103	55.3272	59.5606	69.3103	69.9115	65.0926	84.1644	97.9096	105.018	103.02	121.191	142.979	164.391	172.422	178.56	211.312	228.506	259.237	274.347	267.486	290.453	291.454	268.68	261.519	233.269	187.27	180.785	146.13	116.98
2011-03-12 03:36:31		1.62867	0	1.39123	0	0	0	1.02771	0.955788	0.969628	2.41619	10.6083	18.608	15.9391	19.5162	23.9301	22.2584	26.7792	31.8412	43.0497	51.9779	52.0276	56.8458	65.5926	75.7022	76.3228	90.0279	101.569	110.167	105.954	128.926	135.445	158.898	170.148	184.551	223.508	229.229	276.711	279.006	307.54	285.813	286.663	295.21	240.395	225.629	204.104	187.959	152.904	130.597
2011-03-12 03:51:31		0	0	0	0	1.19317	0	2.20757	1.76967	3.55862	4.98109	6.01779	6.2467	7.46452	16.7931	15.3491	26.0102	30.5224	29.775	35.316	50.9558	53.4821	55.2679	76.0131	61.741	74.5186	85.3561	95.058	110.721	113.832	115.859	147.189	163.622	170.695	191.186	216.889	253.876	244.053	295.182	289.257	309.421	278.966	273.193	270.583	240.453	223.72	189.054	158.87	122.971
2011-03-12 04:06:31		1.62856	0	0	0	0	0	1.02766	0.955647	3.55907	4.15093	9.80625	6.95946	10.9418	12.3496	17.3277	24.5338	25.1751	34.7833	44.5173	47.601	67.349	58.151	66.2907	74.1394	82.7522	91.5571	92.3093	105.598	114.655	132.189	144.81	167.246	189.175	205.306	235.298	245.727	265.561	278.462	292.422	293.317	259.479	286.725	271.967	246.861	212.146	178.846	149.94	130.909
2011-03-12 04:21:31		0	3.01086	0	1.28816	0	0	0	1.5971	2.07171	4.15109	4.53577	9.72984	11.7075	19.7392	17.3728	22.015	29.2917	30.3189	36.6122	45.2696	53.3359	70.5397	73.8692	73.1356	77.5083	80.5077	108.45	106.104	112.709	106.245	150.287	154.736	186.23	193.351	231.252	275.577	287.973	306.845	286.615	326.093	308.037	266.304	252.368	226.551	215.25	181.462	170.148	129.788
2011-03-12 04:36:31		0	0	1.39111	0	1.19321	0	4.11093	2.86679	2.66891	3.76131	2.58624	5.51744	14.5394	14.354	19.9686	23.3914	29.3319	35.0388	44.1478	52.3939	51.8522	59.0635	63.8215	92.8538	84.775	95.1413	109.879	108.78	127.851	132.959	132.558	175.899	191.316	205.182	249.723	254.363	291.755	285.479	294.351	304.868	316.665	279.996	259.347	255.763	224.139	180.661	168.996	129.776
2011-03-12 04:51:31		1.62846	0	0	0	0	1.10789	0	0	2.66897	4.98119	5.94538	8.35279	8.65436	12.2417	17.9541	23.0373	24.0873	28.9633	44.2173	52.0612	56.476	65.7859	67.0375	73.5237	74.9346	90.3151	93.8939	105.044	112.476	125.192	158.362	172.264	179.523	204.613	230.885	262.079	235.493	280.705	300.941	326.035	290.904	285.761	279.449	246.206	217.136	190.655	162.59	144.625
2011-03-12 05:06:31		0	0	0	1.28834	0	0	0	0	1.77931	4.15138	11.3559	6.84997	6.00372	11.6694	19.2019	24.7674	27.5777	39.4234	40.6574	48.0263	55.1247	67.8776	73.7994	77.9497	78.4731	78.6096	101.396	111.124	116.365	135.487	133.169	181.41	189.609	190.885	225.503	244.958	267.384	284.535	266.256	293.381	307.955	297.416	282.444	251.773	238.001	179.924	154.531	135.711
2011-03-12 05:21:31		0	1.50549	0	0	0	0	0	0	1.77953	4.15131	0.73059	10.5194	10.2348	17.3766	20.0546	17.4399	25.1895	36.1413	48.0112	51.8663	54.7202	56.0292	65.4548	68.3747	84.7785	85.9003	101.153	108.348	111.948	126.855	142.302	163.516	174.479	211.012	253.293	254.728	270.553	295.613	305.264	271.296	292.444	285.417	266.316	229.804	207.856	188.806	160.609	142.724
2011-03-12 05:36:31		0	0	0	0	0	0	0.117426	0.846554	0.889763	5.43795	3.30885	8.27026	10.3097	12.8257	16.831	19.3055	29.8974	32.0788	41.5212	46.4308	60.3535	51.8869	53.5981	86.5058	69.9891	79.2715	105.497	92.9397	102.895	116.396	150.272	164.297	178.6	201.428	229.609	243.526	272.558	283.353	279.806	302.482	272.063	276.49	241.625	241.032	205.861	170.729	159.066	122.491
2011-03-12 05:51:31		1.62859	0	0	0	0	0	0	0.624458	2.08782	4.15109	6.00628	8.43929	11.748	7.84199	23.0359	23.365	23.5997	28.2678	35.4324	47.0596	59.8244	58.417	68.034	73.1423	79.7295	89.8196	108.458	90.3936	113.779	121.789	150.693	169.501	171.851	209.71	216.326	243.942	258.536	263.46	303.71	277.917	274.159	279.77	261.673	219.629	212.909	173.412	141.671	115.377
2011-03-12 06:06:31		0	0	0	0	0	0	0	0	4.44849	3.32096	4.50548	6.75279	15.863	16.2234	16.4421	17.8916	34.3724	27.0589	42.874	39.2346	51.3949	55.9058	58.4231	76.8933	70.2112	81.5708	84.4006	97.2824	116.406	139.099	132.951	171.128	164.465	193.748	205.282	241.625	268.694	273.726	278.844	304.233	296.47	269.199	257.328	223.886	219.329	155.679	136.691	121.514
2011-03-12 06:21:31		1.62867	0	0	0	0	0	0	0.95559	0.889603	1.66048	10.579	7.77747	6.07654	16.3463	20.756	18.0849	24.6689	26.7819	33.4304	48.3247	51.9446	52.5115	63.4516	72.708	74.2237	99.4337	96.7048	93.0298	111.051	126.921	134.882	141.152	181.266	188.099	200.068	241.46	237.542	269.505	300.789	305.843	283.151	272.638	260.03	226.853	197.702	157.771	140.375	118.05
2011-03-12 06:36:31		2.54407	0	0	0	0	0	1.02764	0	7.1176	1.26561	2.5869	3.2466	10.9062	14.8854	24.271	20.853	30.1124	36.6359	41.0122	35.0955	53.9272	63.3212	60.9958	66.2343	72.1022	85.2853	90.9167	95.1471	108.763	115.461	125.3	157.861	173.001	191.268	204.487	249.932	270.25	277.516	265.907	298.808	300.264	262.079	239.864	219.768	214.615	157.218	130.266	110.722
2011-03-12 06:51:31		0	0	0	0	0	0.627183	2.50122	3.82269	1.77945	4.98154	5.94266	9.96157	10.7936	20.596	15.6717	23.2861	24.4617	34.6135	37.0756	38.0192	43.0955	56.2353	57.8026	60.966	73.8221	84.4231	92.6593	108.477	97.276	122.899	137.997	146.472	163.776	202.993	227.989	230.054	257.644	263.161	270.062	285.759	278.429	270.261	228.049	219.091	197.702	156.276	137.015	118.572
2011-03-12 07:06:31		0	0	0	1.2882	0	0	0	1.91128	3.55878	1.66038	2.9766	7.18641	11.0059	10.991	15.8773	25.8578	27.7652	31.0493	35.5356	44.8715	41.7	56.5731	74.5276	71.7032	80.392	78.4558	93.0103	93.6814	89.2926	116.121	130.12	151.176	175.777	170.292	202.197	238.269	244.938	275.014	280.947	292.945	277.314	239.309	221.408	225.21	191.609	149.101	137.885	117.72
2011-03-12 07:21:31		0	0	1.39117	0	1.19323	0	0	2.86745	0.889804	3.32096	4.36583	5.46401	11.7397	7.68026	14.2065	25.5769	27.2454	25.757	45.0022	38.4282	50.5561	53.9516	68.6375	67.5183	78.1413	85.0167	90.1298	96.358	96.1715	121.939	120.732	147.933	182.286	183.434	199.902	230.639	255.309	267.949	279.715	272.771	284.485	271.831	244.181	204.828	184.431	146.963	128.343	121.004
2011-03-12 07:36:31		1.62879	0	0	0	0	1.10785	0	0	3.55894	6.64183	0.694571	6.59051	12.8879	16.4826	13.3834	30.0555	23.378	25.5749	28.0966	41.5429	31.4255	47.5869	61.9837	56.7356	69.4821	89.3183	84.3974	98.4067	116.66	118.582	132.764	165.873	177.4	193.389	200.775	225.11	236.428	258.714	254.874	285.565	266.184	264.609	241.132	205.18	195.971	158.576	132.148	99.6019
2011-03-12 07:51:31		0	0	0	0	0	0	0	0.955811	0	5.81234	7.38131	9.89551	8.78288	11.7547	18.6504	25.4361	23.6118	24.8543	31.6687	44.3897	48.4128	51.7994	59.3667	64.0766	69.1269	74.9641	82.2183	95.1638	91.7304	107.635	136.587	150.917	182.632	195.773	204.333	225.397	247.123	266.681	267.664	288.644	301.781	239.525	248.043	222.204	188.66	165.07	114.443	100.858
2011-03-12 08:06:31		1.62875	0	0	0	1.19333	1.10787	1.02771	0.955811	0	5.81215	9.12785	2.57514	10.6694	11.4234	12.7671	16.0074	30.4443	28.5136	33.801	33.1587	52.6359	47.6699	50.0833	69.1798	68.8994	89.7215	87.9917	107.186	103.303	130.449	135.346	143.906	170.383	168.125	203.634	222.869	241.31	263.572	276.859	309.072	274.571	246.953	230.561	203.768	191.521	157.163	132.049	105.077
2011-03-12 08:21:31		0	0	0	0	1.19343	0	1.0279	0	1.77953	4.56369	9.47042	9.06452	12.621	12.708	21.5763	20.3307	30.242	32.8154	45.6163	40.7619	42.4228	50.0881	59.4237	62.9853	76.4724	86.1163	101.805	96.7917	105.446	118.141	134.984	148.826	156.927	192.25	215.978	222.049	232.374	255.038	259.844	246.813	281.352	261.606	249.774	208.081	193.496	151.304	136.631	104.805
2011-03-12 08:36:31		0	0	0	0	0	0	0	3.82317	3.55907	2.49085	5.91606	4.21288	10.2332	13.386	17.7875	25.6779	28.3586	35.6891	32.5231	43.083	42.5984	44.2529	54.15	69.7978	70.1231	77.0151	95.0183	98.5279	110.659	127.747	143.862	149.181	163.486	189.008	196.773	230.515	245.329	257.995	279.579	274.888	283.393	246.54	229.465	206.248	177.564	145.242	127.652	119.166
2011-03-12 08:51:31		0	0	0	2.57694	0	1.10803	1.02772	2.86739	1.77977	3.32157	5.20878	11.3485	8.59673	16.2036	23.8465	23.9527	26.3015	30.7979	33.6067	38.3343	47.425	51.7561	56.9038	71.841	79.1849	87.2436	94.8394	99.3894	102.392	113.961	116.228	142.917	163.373	185.799	221.891	237.314	280.557	272.957	284.95	273.269	257.851	245.449	231.943	207.508	172.045	157.528	134.541	115.633
2011-03-12 09:06:31		0	0	0	0	0	0	0	2.86735	2.74682	4.90958	4.44958	3.24862	9.11298	12.1617	14.2765	19.6973	32.8487	23.1088	36.6397	39.3304	49.3804	47.5952	67.6298	70.8788	68.067	69.3849	82.4955	101.427	110.499	112.604	125.288	151.468	172.973	178.275	204.878	227.37	253.105	264.045	282.274	285.731	263.67	251.601	238.904	211.242	177.714	145.266	132.089	110.644
2011-03-12 09:21:31		0	0	0	0	0	0	0	0	1.82164	3.69163	5.62962	7.68032	10.0711	13.2516	16.845	21.7883	26.2476	20.8226	38.0497	33.6833	48.1048	51.2391	58.9417	62.7776	78.3234	75.8984	99.2208	101.755	107.326	121.529	123.996	149.038	177.165	199.547	205.168	231.789	252.648	271.522	262.965	299.207	263.201	261.691	225.838	208.446	175.952	135.873	120.017	114.151
2011-03-12 09:36:31		0	1.50573	0	0	0	0	0	4.77997	1.77975	4.15202	7.58298	6.12465	11.7295	8.5792	12.5973	18.6521	27.8335	29.4379	42.1054	44.4016	52.5856	47.2651	58.7317	65.8301	72.9856	71.9484	83.4673	92.3683	101.611	123.912	144.581	154.8	189.391	179.774	211.35	229.81	257.494	267.294	285.196	273.402	280.038	238.578	231.595	223.311	176.484	171.302	123.408	102.688
2011-03-12 09:51:31		1.62935	0	0	0	0	2.21665	1.02814	0	0	1.6613	5.13583	6.27247	12.9851	12.5746	15.2532	26.2935	20.6657	33.2205	35.3558	36.534	46.7106	55.458	55.2131	62.4734	67.6558	89.9929	95.6881	102.959	104.897	116.729	125.682	170.519	166.596	187.288	188.179	239.507	249.922	251.701	294.067	294.483	269.021	246.522	242.338	211.242	182.246	142.416	131.068	119.757
2011-03-12 10:06:31		0	0	0	0	0	0	0	2.86861	2.67039	6.64516	9.84708	8.33571	7.6858	15.002	21.2795	21.386	25.6607	26.6705	37.6587	40.6628	47.6218	50.2856	68.3862	66.2567	61.9926	86.4083	80.3696	90.7163	114.754	123.882	136.312	160.561	160.411	189.093	204.846	228.888	250.208	263.327	289.145	285.779	269.559	273.221	234.942	217.602	183.834	152.101	125.891	98.4651
2011-03-12 10:21:31		0	0	0	0	0	0	1.02846	1.91284	2.67091	0	9.8675	7.03006	17.753	14.873	12.0381	19.7575	26.8644	36.567	29.3189	35.2183	50.8933	50.2298	53.7699	58.1157	77.3381	80.4314	92.7346	100.939	112.713	110.397	143.131	171.771	172.524	185.976	213.105	235.966	258.576	268.061	294.826	282.207	265.897	278.756	226.885	205.198	175.481	153.225	124.888	100.823
2011-03-12 10:36:31		0	0	0	0	0	0	0	0.956269	1.78055	2.49227	2.24876	7.72029	12.4472	7.67817	16.3335	15.2012	23.7686	35.5349	37.067	33.4247	43.774	52.7304	58.3401	65.9442	64.9856	77.5449	96.5814	94.0577	108.904	130.525	136.238	161.847	171.138	188.694	214.067	231.562	267.784	246.983	291.569	282.632	284.713	253.738	237.38	222.522	179.367	155.727	127.302	100.263
2011-03-12 10:51:31		0	0	0	0	0	0	1.0284	0.956391	2.6509	5.00317	3.78577	4.9791	9.79119	12.6748	18.9563	19.7082	17.4495	31.7254	35.3003	45.2631	46.4029	45.133	57.2349	71.8667	66.8378	71.549	86.0442	113.339	110.403	126.114	138.211	139.497	171.831	204.279	214.255	260.851	269.195	279.451	272.744	280.451	268.78	257.907	244.894	210.208	187.047	162.893	126.24	120.627
2011-03-12 11:06:31		0	0	0	0	1.19415	0	0	0	0	4.98558	6.73042	6.20006	9.18997	18.2197	17.1464	22.7252	34.917	23.4397	35.7234	43.7151	50.2622	53.8599	58.7939	63.0141	75.8115	92.5061	85.4458	87.5548	109.603	120.701	145.008	152.424	182.913	203.73	221.142	232.532	256.208	260.014	285.086	284.866	285.936	260.429	248.592	208.778	180.036	158.371	123.557	122.772
2011-03-12 11:21:31		0	0	0	0	2.38868	1.10871	1.02859	0.956471	2.67165	1.66208	3.47571	5.80218	10.2607	14.4391	22.4982	17.7229	30.2472	35.174	37.7506	44.6984	46.3128	47.3891	59.8615	66.9135	79.9955	74.8135	104.97	115.16	111.278	128.638	147.105	160.471	187.097	175.563	223.648	232.354	270.785	251.506	274.301	311.987	269.209	253.233	228.209	213.96	176.029	156.154	120.343	111.499
2011-03-12 11:36:31		1.63015	0	0	1.28942	1.19423	0	0	1.9131	1.78093	6.05811	6.44837	6.90827	7.16173	14.3197	13.3903	27.7849	19.8197	26.9567	30.129	35.551	45.9571	55.8856	60.9513	64.416	72.7167	89.1792	94.3256	105.44	118.212	111.112	134.649	164.886	161.653	187.346	203.656	233.423	270.683	264.697	288.844	285.763	285.749	260.371	222.688	217.408	182.039	158.612	120.288	100.08
2011-03-12 11:51:31		0	0	0	0	0	0	1.02869	0.95667	2.67183	4.15519	3.03738	6.24974	9.73218	12.7205	9.57032	16.5499	23.5118	32.2538	35.6705	39.8167	52.0731	59.675	52.5003	60.5917	75.3385	91.8353	100.737	111.417	102.15	115.216	145.455	147.78	169.473	180.316	221.434	253.195	235.661	255.569	255.973	297.883	273.117	251.741	238.289	211.186	180.032	159.595	140.635	106.81
2011-03-12 12:06:31		1.63015	0	0	0	0	0	2.05725	1.91322	5.34333	4.15481	3.71013	6.83417	7.17112	13.2478	19.5249	24.502	28.1468	26.4271	31.2614	37.0747	36.9763	48.4135	57.542	72.3221	66.574	91.7599	101.266	105.189	105.486	115.888	134.729	166.607	168.934	191.681	221.364	233.197	275.949	287.053	281.382	274.099	267.154	277.374	246.783	197.88	181.963	150.136	124.244	93.5151
2011-03-12 12:21:31		1.63031	0	0	0	0	1.10879	0	0.956651	1.78105	4.15494	4.52439	9.02699	10.3745	12.7195	14.0484	17.3465	28.4744	29.2294	35.9106	31.5629	50.0516	57.3625	68.608	65.0179	75.2667	82.3747	95.4747	86.9837	101.863	116.783	118.047	150.116	171.927	210.597	224.836	242.806	248.918	271.446	277.646	281.885	278.562	270.312	230.118	222.612	179.916	157.983	131.144	96.6606
2011-03-12 12:36:31		0	0	0	0	0	0	1.02873	0.95675	1.78135	4.15606	6.0308	6.28183	8.96673	16.3379	20.2752	16.0917	22.3805	35.8295	35.601	39.876	51.0266	46.842	64.3849	65.6814	81.5122	83.2686	95.8439	90.0724	113.989	111.585	150.16	156.783	177.74	192.766	206.959	233.738	246.456	295.463	288.488	293.173	266.306	247.146	237.146	211.222	187.144	155.918	120.566	99.0003
2011-03-12 12:51:31		3.2608	0	0	0	0	1.10907	0	3.82699	1.78129	1.66228	6.04667	4.0049	13.9692	16.5877	12.3047	22.8995	28.6727	19.8295	39.3548	37.8234	41.7708	48.7686	66.5554	69.5458	75.0458	81.6804	90.0859	83.7147	106.061	123.085	122.78	138.167	169.479	212.829	189.513	239.994	255.677	249.628	290.843	285.799	277.28	270.162	217.632	226.38	168.383	141.468	131.4	101.285
2011-03-12 13:06:31		0	1.50713	0	0	0	0	1.02871	0.956772	2.67181	4.37061	5.72263	4.08369	9.91026	6.5191	19.996	25.5637	24.0012	29.5346	34.9965	34.1109	52.6965	46.899	69.25	64.0801	71.6942	82.4843	86.5404	94.6308	93.2144	119.449	138.383	142.895	170.126	185.202	200.569	245.541	264.744	275.958	283.257	281.633	280.126	245.455	229.972	228.031	177.3	162.829	128.115	115.737
2011-03-12 13:21:31		0	0	0	0	1.19469	1.10928	0	1.91346	3.56301	3.32519	6.80663	7.67157	9.71141	14.4926	13.2753	25.2128	26.27	30.3418	34.2013	42.5926	44.3663	57.5301	60.0606	54.083	63.2519	75.226	83.8513	79.2535	112.11	123.261	127.756	155.256	178.774	181.148	212.338	227.779	242.4	282.753	273.059	268.722	277.806	266.548	235.186	202.644	179.621	153.596	138.365	99.8821
2011-03-12 13:36:31		0.916606	0	0	0	1.19469	0	1.02893	2.87061	2.67247	6.64997	7.53554	7.65987	7.66984	15.3151	22.0879	23.9686	25.3103	28.8927	27.2492	35.2269	44.4506	53.0071	49.5231	58.525	76.5381	82.0987	77.3247	84.1756	109.582	112.332	139.241	139.982	164.343	205.891	202.788	220.084	270.274	285.988	285.16	280.19	282.049	250.883	223.067	200.236	170.433	139.289	131.911	96.9955
2011-03-12 13:51:31		0	0	0	0	0	0	1.02888	0	0.890804	6.6501	1.44679	4.84154	9.62862	12.7749	26.5523	18.757	20.9058	32.7885	36.4131	46.5808	45.7484	52.0099	54.9881	61.7926	55.6689	81.1817	88.4468	89.6538	108.127	123.688	132.945	146.344	167.378	197.702	213.147	234.249	253.537	264.285	278.103	272.646	272.454	246.01	234.217	212.089	177.013	146.997	124.886	99.8657
2011-03-12 14:06:31		0	1.50735	0	0	1.19481	0	0	0	2.67246	2.49399	3.72474	6.1842	5.55343	15.0766	18.4284	17.0282	29.0829	31.3017	38.2192	36.0506	50.1878	50.3446	55.7058	69.058	73.8353	81.3119	88.9567	88.7978	101.606	121.008	128.958	155.871	173.99	186.5	206.813	218.616	261.428	260.663	266.693	278.41	272.45	272.354	237.574	208.528	194.475	153.167	118.594	107.286
2011-03-12 14:21:31		0	1.50731	0	0	1.19485	0	1.02897	1.91378	1.78157	3.32535	3.3783	6.50958	15.0359	13.7471	19.7774	16.1241	26.4914	35.6077	40.5971	36.4417	39.2157	60.8942	48.6189	58.4179	77.2897	93.674	98.2449	97.9798	100.678	106.122	120.747	150.679	169.607	191.795	200.03	239.249	246.516	263.123	262.34	292.358	266.102	258.546	251.37	199.425	161.723	152.366	125.939	101.579
2011-03-12 14:36:31		0	0	0	0	0	0	2.05809	1.91388	0.890865	4.98795	2.57067	5.09955	7.81038	14.6862	15.5912	24.2927	23.1024	20.4517	30.9519	47.6388	37.9167	52.4747	54.8699	63.0667	65.8811	77.8776	90.5337	86.7189	88.8122	116.232	139.095	142.722	171.01	195.046	216.094	220.174	232.125	266.773	266.062	285.936	282.63	243.321	239.323	202.149	165.519	154.964	122.75	93.091
2011-03-12 14:51:31		0	0	0	0	0	0	0	0.957071	2.67284	2.49421	5.97122	6.91994	4.32029	10.1048	12.1501	26.4455	23.4129	32.2295	37.4436	42.3324	42.5702	54.1696	66.3513	67.1891	69.3369	85.325	86.3122	88.3567	100.852	122.478	133.379	160.229	165.314	183.782	213.363	226.066	265.176	256.767	277.915	260.168	277.766	249.605	217.47	206.384	199.415	152.939	122.531	108.158
2011-03-12 15:06:31		0	0	0	0	0	0	0	0	3.36795	3.50804	4.48801	11.1528	7.06869	15.0785	20.0917	21.7213	32.4163	29.2386	38.1167	44.2487	48.8865	44.2051	43.116	63.7474	75.4228	86.6577	95.2635	105.032	99.7042	113.154	135.55	154.856	158.498	192.931	217.57	239.673	248.439	278.584	295.108	284.912	261.677	237.494	231.753	193.812	164.779	158.888	126.102	101.262
2011-03-12 15:21:31		1.63081	0	0	0	0	0	1.02909	0.956853	5.34474	2.49375	6.3966	8.70365	9.05221	17.0031	16.4737	21.9886	24.7666	27.0407	40.8497	34.0519	58.7737	50.7074	57.7994	65.0221	71.766	84.2269	88.8904	86.4359	97.0282	111.122	139.298	150.797	144.479	205.09	206.829	229.874	250.23	262.296	296.595	287.682	271.02	264.154	228.389	201.929	177.814	153.494	113.195	98.3651
2011-03-12 15:36:31		1.63107	0	0	0	0	1.10938	0	0	0	2.49421	6.29673	4.57538	12.5373	19.761	16.5277	25.2455	20.007	20.7055	33.8407	33.3885	46.2535	47.4955	50.0122	57.8663	69.5747	79.5564	83.342	100.83	111.257	115.673	140.437	146.074	170.551	184.543	188.664	227.71	233.672	245.038	276.985	265.879	258.644	242.756	222.256	211.306	166.933	149.796	130.807	107.096
2011-03-12 15:51:31		0	0	0	0	0	1.10926	1.02901	0.957151	0.890946	4.15699	2.19431	4.78651	15.6539	14.392	20.6791	22.9165	23.0845	36.5183	44.0606	36.8696	47.4532	50.0587	66.9346	62.316	71.2869	86.3894	84.8048	90.0266	114.959	115.696	134.928	160.287	164.842	199.782	202.843	216.949	247.093	265.633	292.548	272.772	276.282	257.336	235.112	215.274	163.009	135.936	115.063	103.344
2011-03-12 16:06:31		0	0	0	1.29021	2.39002	0	3.08762	1.91412	2.67302	3.32567	3.80853	9.12744	15.0009	13.2371	15.9098	18.0838	26.9646	32.2641	41.2712	39.1926	53.0929	45.9891	65.6827	72.4106	65.9875	80.4026	80.5933	84.608	99.0699	114.071	129.088	160.649	160.369	201.262	202.658	232.019	241.304	253.49	272.821	293.844	271.362	247.58	231.999	208.059	188.704	153.6	122.635	91.7446
2011-03-12 16:21:31		1.63121	1.50765	0	0	0	0	0	3.82869	2.67312	4.15744	5.25785	8.25875	10.3936	17.1304	21.9779	17.9797	31.6487	28.4662	33.1891	35.0151	40.3388	53.1808	60.7269	62.1455	70.6365	72.2327	83.383	79.1558	98.2391	117.097	146.144	161.725	168.479	198.137	227.388	232.576	231.072	250.262	286.769	266.646	268.872	259.495	216.915	220.511	173.363	140.879	122.903	99.1788
2011-03-12 16:36:31		0	0	0	0	0	0	0.865045	1.38159	4.20218	4.15744	5.21535	5.35494	7.1633	10.9502	19.5637	25.0322	19.1835	31.1418	31.0319	43.2099	44.1074	52.7952	59.724	65.0933	73.2647	71.6045	90.3144	100.515	110.435	107.171	144.866	153.716	162.408	181.479	234.191	221.585	244.583	265.565	271.4	284.541	255.793	250.535	244.676	187.536	181.995	135.799	130.303	109.737
2011-03-12 16:51:31		0	0	0	0	0	1.1095	1.02919	0.957112	5.34644	2.49445	4.02888	7.21417	9.85487	10.5059	11.0637	22.4513	22.3504	30.7877	42.3122	38.1381	41.5612	55.8651	54.1891	74.1968	70.074	79.0862	97.1593	104.874	96.7554	118.557	145.846	147.239	170.21	190.258	202.256	227.939	251.989	277.632	281.827	269.525	273.93	253.772	228.287	204.98	191.368	156.54	141.811	106.371
2011-03-12 17:06:31		0	0	0	0	0	0	0	1.91414	0.890965	4.15708	5.25346	12.759	9.00814	15.023	15.9214	18.2877	22.2087	29.5166	40.6298	34.9067	47.1913	47.1054	62.6035	68.0199	72.9705	73.2734	92.4071	113.416	99.6292	109.476	137.402	144.754	165.817	181.619	211.827	224.938	233.958	237.181	290.421	292.79	276.158	248.115	238.868	207.933	180.803	155.729	132.935	101.76
2011-03-12 17:21:31		0	0	0	0	1.19491	2.21895	1.02911	4.78554	7.78016	2.71729	7.62035	8.1474	14.5951	23.4233	17.8097	19.6789	26.1973	32.6276	36.9321	40.9526	53.7577	52.2458	57.8353	66.9875	78.1093	80.4013	86.4311	94.9048	117.313	110.008	120.436	167.163	176.196	188.335	223.295	225.11	262.011	262.672	263.383	283.74	248.163	259.249	219.429	205.96	179.742	151.238	130.09	117.713
2011-03-12 17:36:31		1.63093	0	0	0	1.19483	1.10939	1.02903	3.82798	5.34532	1.80722	5.83468	10.3413	12.5397	9.77712	18.1451	21.6456	25.7572	32.4045	45.9731	41.6869	51.0974	52.9221	49.3859	68.3224	79.9071	71.1792	77.8506	108.238	102.003	121.251	114.32	154.215	160.277	185.583	225.04	245.21	257.53	272.382	264.938	266.54	254.503	235.148	224.056	215.106	185.645	155.048	142.867	110.172
2011-03-12 17:51:31		0	0	0	0	1.19483	1.10926	2.05807	5.74215	2.6729	4.1567	11.4639	11.987	13.9221	15.6997	21.7564	21.2819	25.0978	22.2037	39.2481	42.7833	45.6202	53.4824	62.7673	60.634	71.3003	81.3587	88.0798	88.5429	95.4189	109.654	129.389	142.45	183.441	183.658	215.631	246.472	236.939	262.54	272.013	279.056	241.134	239.209	239.03	207.913	176.713	154.968	125.016	113.748
2011-03-12 18:06:31		0	0	0	0	1.19487	2.21859	4.11603	1.91394	3.56359	8.31321	5.27147	10.1803	10.0087	17.239	19.1356	23.0032	25.2777	28.9147	32.6699	46.449	45.124	50.9571	59.7077	68.458	80.566	96.5596	87.2885	101.629	99.5939	112.188	135.946	139.235	157.69	196.701	212.47	220.992	257.674	257.997	277.384	286.588	261.162	234.676	248.948	213.704	189.513	158.672	129.155	112.533
2011-03-12 18:21:31		1.63085	0	0	0	0	0	4.11635	2.87113	8.01872	10.9497	17.3368	14.1688	15.7636	18.9778	16.1464	33.3196	25.9856	31.9575	36.9561	31.2031	41.2337	46.2731	61.5974	75.458	69.8599	75.1696	92.6279	106.974	102.149	108.94	118.447	147.155	163.588	173.023	187.937	230.2	244.982	263.598	306.929	277.696	272.706	239.219	228.842	211.803	170.295	154.627	139.754	104.19
2011-03-12 18:36:31		0	0	1.39293	0	1.19479	0	3.0872	4.78465	6.91349	12.6687	10.5445	13.3234	14.3712	23.7572	20.0359	29.1068	32.9298	34.7673	30.1765	41.9471	50.5346	43.5468	59.6054	58.0327	62.2798	71.0654	87.4433	98.2337	104.39	115.199	142.514	141.769	151.791	197.6	212.454	226.39	237.534	265.727	287.496	272.282	266.464	252.394	234.605	211.617	180.769	162.578	130.791	99.9506
2011-03-12 18:51:31		0	0	1.39279	0	4.7792	0	1.02891	1.91396	7.12705	13.3013	9.14644	11.7741	9.23881	13.467	17.1174	22.9876	27.5821	25.8846	35.4731	33.9712	48.7978	52.4247	60.349	64.6279	65.774	84.1644	93.4144	88.6	108.965	118.072	131.308	146.553	176.843	190.751	213.059	225.337	233.632	258.439	264.747	259.461	254.958	255.986	225.651	204.601	177.68	155.457	123.67	117.521
2011-03-12 19:06:31		3.26099	0	1.39273	1.28987	2.38954	1.10923	10.1536	11.0123	14.8085	22.4435	26.9401	19.8991	23.264	24.0239	23.8942	21.2737	30.8386	34.4484	38.3362	42.0272	57.8651	56.5087	63.0897	55.1929	70.7045	87.158	95.7798	95.7196	102.379	116.807	125.571	152.5	192.726	180.823	228.556	213.396	232.825	254.529	242.532	276.302	237.937	253.381	246.59	202.893	186.274	160.689	123.013	108.785
2011-03-12 19:21:31		0	0	0	7.73897	1.19495	2.21827	8.07295	18.3284	16.7138	26.7965	33.9212	39.6157	39.2689	37.2897	40.5718	30.4255	42.7304	36.2926	41.0087	45.6048	53.2103	53.5859	67.5987	68.0609	77.9147	80.4984	88.6917	103.507	109.723	129.004	135.771	140.923	161.937	188.049	202.021	217.622	254.291	270.116	275.469	269.271	265.084	261.562	236.867	216.643	175.15	160.034	124.387	99.6394
2011-03-12 19:36:31		1.63063	0	0	0	1.19469	10.3806	14.0354	26.7915	27.6138	36.7343	37.741	36.1881	40.1016	40.0635	44.9679	50.9788	45.8234	41.692	41.8994	48.3939	51.6253	60.8683	60.3154	71.2003	71.6189	85.8955	84.549	102.421	114.005	122.045	144.595	140.016	165.353	184.942	210.557	194.173	254.531	257.684	268.654	295.152	265.589	270.883	243.736	197.51	193.876	154.173	127.318	117.045
2011-03-12 19:51:31		0	0	0	1.28968	1.19465	2.62278	9.78939	10.986	15.5404	21.2623	22.6214	26.4037	26.4752	30.3123	27.2911	33.3	33.1904	45.9651	42.2474	49.7269	54.024	53.524	58.2269	65.4106	61.7673	67.5731	84.0003	102.609	113.624	104.728	132.133	148.692	160.971	161.897	225.693	225.212	249.377	276.174	279.86	274.179	258.189	257.554	230.695	196.07	197.314	150.803	138.52	102.603
2011-03-12 20:06:31		0	0	1.39273	0	0	1.1092	1.02885	3.82721	4.45388	8.31231	9.05042	17.0958	13.808	15.9888	21.4285	23.8134	23.5763	28.5663	31.2015	38.4026	48.6077	51.8692	66.2817	65.5279	68.4603	83.5628	96.174	98.5333	96.4141	144.131	129.214	163.412	181.066	183.544	195.132	231.979	259.024	278.343	269.89	279.726	269.573	254.467	209.181	205.383	172.404	153.566	129.194	90.651
2011-03-12 20:21:31		1.63055	0	0	0	0	1.10913	2.05787	2.87059	5.34465	5.81904	7.6074	6.93865	8.97215	10.8629	23.2796	19.9143	22.2302	31.3249	35.4122	40.4401	40.8824	45.9596	61.9638	60.4859	58.4548	76.4074	101.169	89.9	100.943	114.206	117.52	143.612	166.543	179.964	210.539	222.364	234.131	243.786	251.693	290.553	271.975	254.962	223.564	219.353	188.726	155.867	124.553	100.847
2011-03-12 20:36:31		0	0	0	0	0	0	2.05803	1.9139	1.78169	4.98779	9.48506	7.95397	11.7649	20.4836	14.2149	19.5141	27.6058	34.3718	29.5781	42.3327	41.1067	49.7327	54.8022	59.9712	62.091	78.6494	83.8288	98.6042	102.059	114.989	137.346	153.213	166.506	178.692	194.628	213.083	239.399	254.932	278.444	270.841	263.946	250.585	234.589	207.784	175.24	160.338	128.665	100.09
2011-03-12 20:51:31		0	0	0	0	0	1.10926	0	3.82776	4.45417	2.49385	11.355	9.80317	10.9702	14.7208	11.4485	26.0539	25.0767	34.0872	30.1362	39.799	43.367	52.2022	48.458	61.5676	65.784	75.4413	91.4997	91.7054	91.7013	112.45	125.204	151.262	161.564	200.561	228.111	220.747	244.826	264.453	283.688	240.595	252.522	253.505	234.517	203.003	166.596	159.699	128.207	104.052
2011-03-12 21:06:31		0	0	0	0	0	0	0	3.82785	3.3551	5.18196	5.58506	7.95516	11.1892	12.1226	11.7982	23.7987	28.0635	23.8325	26.7658	41.1798	44.525	50.2423	60.8923	54.1679	73.0103	92.2663	72.8093	96.9596	90.5192	114.655	121.216	133.774	185.659	184.287	201.561	231.538	259.337	267.983	259.573	277.316	261.811	260.879	227.149	190.272	183.576	150.962	120.673	107.484
2011-03-12 21:21:31		0	1.50729	0	0	0	0	0	1.91386	2.67246	4.98779	3.63558	14.123	9.74631	13.2925	12.6833	23.9205	28.1184	26.8037	36.149	42.9606	46.1644	49.9333	59.8413	57.3128	64.4163	74.7478	92.7529	95.558	102.271	131.604	118.171	159.225	152.61	178.169	189.213	238.436	253.505	274.78	293.413	274.646	274.321	270.947	238.159	223.121	184.902	155.807	148.436	114.435
2011-03-12 21:36:31		3.26163	0	1.39299	0	0	0	1.02899	0.956891	0	4.98779	5.66577	5.99503	9.01449	16.0635	13.8909	27.2694	21.6084	29.1173	23.3854	42.3369	40.8173	45.4266	53.1295	69.6423	71.6567	71.8474	98.8705	85.8058	88.0981	117.815	141.096	156.444	165.082	180.11	216.969	222.053	259.409	241.242	277.157	294.077	269.852	282.753	239.599	232.188	188.373	159.629	143.858	108.092
2011-03-12 21:51:31		0	0	0	0	0	0	0	0	6.04798	5.99429	4.50869	8.94763	11.3533	14.8818	17.6028	22.6468	23.4082	21.4963	27.6314	42.9138	51.2631	55.1324	54.9122	63.8474	74.1301	77.8567	99.5205	109.903	103.695	120.545	120.737	152.694	177.903	195.555	197.199	226.588	256.098	272.981	292.762	286.973	285.817	272.514	241.194	230.361	189.694	168.93	139.563	108.546
2011-03-12 22:06:31		0	0	0	0	0	0	1.02895	0	2.67276	3.32535	5.25429	11.3011	9.68279	10.7141	11.2677	20.9974	22.2809	28.7011	36.9029	47.4744	33.9737	60.2167	54.6058	57.6061	58.584	78.7571	94.2721	86.8987	109.158	127.478	133.806	173.882	167.901	178.005	226.27	245.361	259.481	262.913	288.532	295.09	275.791	275.723	242.189	217.38	207.871	158.113	145.925	109.438
2011-03-12 22:21:31		0	0	0	0	0	1.10923	0	0.957032	3.37798	5.16083	3.68635	6.91362	9.65875	8.2941	16.5821	30.0765	23.6888	31.1855	35.8391	37.6369	36.0583	48.9413	63.6712	55.4071	66.3359	67.4394	89.9099	93.8785	120.182	117.596	128.902	163.462	182.46	194.591	227.408	259.459	277.252	260.741	292.446	294.159	296.376	267.113	254.429	219.573	203.998	167.221	158.632	111.068
2011-03-12 22:36:31		0	0	0	1.28982	1.19493	1.10931	0	0	2.6728	4.9884	5.34596	8.38872	11.7586	17.1543	17.708	17.1432	22.6226	27.6479	32.1827	39.726	44.0106	52.4119	64.1686	64.2125	61.8747	68.9869	85.2253	88.5981	118.59	118.649	138.558	147.682	222.478	216.999	229.848	261.086	257.215	275.325	273.223	289.729	270.839	260.152	247.682	225.537	211.512	165.33	151.939	123.946
2011-03-12 22:51:31		0	0	0	0	0	0	1.02907	2.87096	2.6727	4.98811	8.32487	6.15314	9.22128	11.9269	10.2672	19.3516	26.2992	24.5393	37.0984	42.0901	37.6269	49.4715	53.5625	61.5474	77.1545	77.191	94.3641	104.555	90.8987	108.56	124.572	169.966	166.511	210.262	218.544	236.396	247.808	288.353	305.298	272.734	282.368	246.324	255.507	224.197	201.494	158.023	146.546	115.731
2011-03-12 23:06:31		1.63085	0	0	0	0	3.32795	1.02907	4.78484	1.78191	3.32551	4.46369	11.9368	10.4959	15.2901	17.8576	22.2869	28.5425	23.0102	29.2274	38.4321	43.3917	49.6933	53.0163	71.7186	71.2356	75.576	94.1324	89.3208	115.024	124.198	128.187	151.246	173.173	198.834	205.651	215.677	265.623	252.324	276.414	280.122	288.818	276.761	235.495	210.34	195.981	165.896	129.297	111.736
2011-03-12 23:21:31		0.916766	1.50751	0	1.28996	0	0	0	2.87103	1.78185	0.831372	4.44375	5.25314	12.4278	11.5523	12.0031	19.5313	27.9914	38.8965	31.4181	44.6218	48.4622	48.6029	63.9051	59.9532	61.3856	81.4083	89.1458	101.447	105.533	128.532	133.429	153.315	164.008	183.72	189.571	219.08	254.048	260.805	280.411	313.257	287.955	274.896	252.812	219.413	206.713	158.476	143.572	111.792
2011-03-12 23:36:31		0	0	0	0	0	0	0	0.957032	2.67288	4.15686	4.89513	10.0507	11.8362	10.0877	12.7907	17.6061	22.0477	30.4507	36.0234	37.0923	50.1263	51.859	53.4609	58.5429	77.5619	75.8298	80.5603	98.3907	111.891	123.303	160.437	170.026	179.231	218.407	209.84	262.466	263.55	290.875	286.506	305.96	307.896	262.115	251.246	224.038	207.6	160.807	135.787	100.516
2011-03-12 23:51:31		1.63101	0	0	0	0	0	1.02921	0.957032	2.67314	2.49435	3.02298	11.8227	8.44061	14.0078	11.5995	12.6128	23.9067	29.9828	33.7856	35.8436	48.0349	42.7827	69.6622	56.1936	70.4532	77.3577	104.682	93.1968	105.744	125.473	153.031	156.244	192.664	217.59	241.667	256.645	264.527	306.206	314.029	281.08	311.717	293.181	252.456	225.09	186.815	174.359	139.529	117.354
2011-03-13 00:06:31		1.63101	0	0	0	0	0	0	0.95709	4.22381	3.54141	9.09686	8.43022	12.4169	14.7866	12.9616	19.8796	19.7782	32.191	27.2771	35.2096	48.9048	40.9522	60.6442	61.0651	73.334	80.8106	86.1708	94.6869	114.449	130.176	142.438	175.477	185.114	193.66	223.95	248.273	283.732	284.822	290.651	308.159	303.55	264.798	255.304	228.005	192.608	176.314	133.191	120.128
2011-03-13 00:21:31		0	0	0	0	0	0	0	0.957112	0.891087	6.6517	3.77663	6.12247	6.67205	10.8154	19.523	16.3505	17.3429	26.985	29.1885	36.5234	37.0359	47.5013	49.7734	65.0317	67.5878	77.8266	99.9673	104.767	98.2571	113.04	156.048	157.774	167.308	194.912	250.611	248.744	262.893	318.666	318.972	299.021	309.772	265.92	256.583	223.105	198.335	168.474	135.855	105.168
2011-03-13 00:36:31		3.26208	0	0	1.29014	0	0	0	1.91416	3.56413	3.43907	6.77686	4.8451	8.42615	12.8134	21.7189	18.6948	18.6506	24.1879	27.4739	45.4503	52.7772	52.6304	54.3853	61.7221	65.6494	78.0266	86.2696	101.479	104.784	104.421	148.295	155.213	203.46	201.871	210.992	256.39	281.725	309.253	298.221	287.139	287.766	277.266	266.452	230.363	196.721	174.249	144.491	112.764
2011-03-13 00:51:31		1.63087	0	1.39309	0	0	0	0	0	1.78195	4.15731	5.25949	5.54497	8.21327	10.341	12.9279	20.4924	23.3113	32.1429	27.1482	34.1689	49.9173	44.7728	59.0285	67.3269	67.8958	72.3782	85.7215	104.384	109.94	141.516	144.601	154.217	180.617	218.6	227.36	238.614	290.631	316.554	315.92	288.928	298.095	295.124	259.874	259.784	189.671	175.984	142.27	111.453
2011-03-13 01:06:31		0	0	1.39321	0	0	0	0	1.91414	2.67292	1.66292	6.05676	5.39199	10.3771	10.7741	17.2441	17.5419	28.7007	33.401	34.1263	34.9163	48.1413	47.5724	53.8769	68.017	68.3391	75.4093	96.6705	102.005	121.07	116.338	139.369	171.086	188.7	212.67	233.317	251.749	273.187	275.319	308.159	313.914	307.919	286.468	271.725	251.877	216.196	166.45	145.731	109.303
2011-03-13 01:21:31		0	0	0	0	1.19509	0	1.02915	0.957151	2.67314	1.66294	6.02705	4.86766	5.24679	14.0531	20.1202	18.6432	20.2321	22.7229	29.7522	35.0282	39.0109	54.0923	58.2577	69.1478	65.0747	92.7888	99.083	104.526	104.931	144.681	140.186	174.277	197.779	213.017	211.562	246.999	296.382	295.186	306.356	328.567	310.751	295.771	289	240.541	212.74	182.48	152.616	117.35
2011-03-13 01:36:31		0	0	0	1.29012	0	1.10952	0	0.957112	0.891026	2.49439	2.50152	9.59946	8.55058	14.5839	16.4449	17.7291	17.0176	24.1695	32.0699	40.3256	32.6465	52.2388	54.7987	59.2391	76.342	86.4699	91.7615	93.4862	111.108	132.332	129.956	170.653	194.046	198.56	233.682	246.464	298.001	310.311	311.747	337.827	290.667	306.172	270.387	256.853	215.316	178.858	147.005	117.135
2011-03-13 01:51:31		1.63107	0	0	0	0	0	0	1.91418	0.890965	2.49429	2.23494	4.80952	10.9737	10.1674	14.7252	19.6662	25.0435	30.9088	31.8479	34.5997	40.5167	43.9654	60.141	71.9712	73.8087	84.9526	107.365	104.039	111.482	127.292	150.325	164.619	185.795	219.477	230.791	273.057	299.527	307.143	318.602	286.739	312.053	270.885	265.529	243.135	208.486	180.337	155.078	123.778
2011-03-13 03:06:31		1.63097	0	0	0	0	0	0	0.957151	0.891026	4.15728	4.92888	11.4042	7.26881	7.04468	18.2875	18.2748	27.5593	23.5801	36.5359	38.2939	45.4853	49.1125	48.8369	56.1135	78.9199	85.2962	98.4064	103.38	127.047	128.458	148.68	163.81	184.848	205.896	221.749	257.133	305.022	295.136	331.503	328.288	318.115	303.339	269.114	254.884	222.905	170.21	145.887	120.449
2011-03-13 03:21:31		0	0	0	0	0	0	2.05833	1.91416	0.890987	1.66286	6.82407	5.61535	6.19542	9.54853	18.7136	14.7722	18.5022	33.7391	32.7801	39.8689	49.7571	47.309	35.3923	49.6994	71.2295	79.3064	95.0574	96.4798	121.899	133.217	147.598	156.464	196.206	206.398	242.524	257.819	278.848	295.809	319.539	324.08	318.978	309.585	274.91	245.805	201.54	188.165	144.449	119.531
2011-03-13 03:36:31		0	1.50763	0	0	0	0	1.02923	0	3.56407	1.663	6.8566	4.67426	5.20625	15.3586	12.7204	15.6537	20.8079	23.3447	29.9996	40.4369	42.0705	52.8449	51.183	57.8561	78.7929	75.8837	87.9019	111.87	123.518	122.488	148.145	160.971	179.615	218.62	244.527	266.793	282.212	311.781	326.317	307.83	300.401	286.17	273.74	250.451	212.358	164.932	170.667	125.467
2011-03-13 03:51:31		0	0	0	0	0	0	1.02927	2.87129	1.78205	1.66298	3.73856	7.07631	8.18971	8.95506	13.9193	19.2256	21.9885	36.7186	26.5709	41.6522	37.2628	52.5067	54.2917	71.8442	73.6122	81.5683	100.527	92.7381	112.236	131.096	146.935	158.774	210.607	220.677	237.935	242.468	289.325	315.276	299.349	315.29	302.891	299.874	262.558	249.327	210.907	189.315	150.308	125.359
2011-03-13 04:06:31		0	0	1.39341	0	1.19515	0	0	2.87157	2.67332	0	6.82497	8.47615	9.63234	12.1804	12.6688	14.8161	21.4297	28.4892	29.5541	41.9747	48.9865	39.6349	50.5708	58.3958	70.4404	69.4843	90.9833	113.057	106.628	124.836	132.17	155.407	181.562	227.45	245.735	256.322	301.601	297.716	326.603	307.175	288.726	275.881	253.011	214.836	190.453	166.737	140.22	115.099
2011-03-13 04:21:31		0	0	0	0	0	0	0	0	2.67314	3.32599	0.716228	1.9975	9.61744	8.78904	14.1659	22.1252	19.1462	31.0058	35.2609	33.4923	35.5837	42.1019	69.2587	54.3708	72.7051	69.8994	90.4978	85.5189	101.483	128.521	146.232	153.712	207.883	207.838	243.377	259.026	299.433	287.696	309.385	307.162	286.038	291.921	261.272	260.779	217.46	178.127	158.822	116.689
2011-03-13 04:36:31		0	0	0	0	0	0	0	0.957071	0	3.32599	8.33596	9.93503	5.00955	7.65269	15.8656	18.5367	16.4218	29.5643	30.3029	39.2955	40.9048	40.4372	49.8849	73.3019	72.2535	76.1942	91.8875	102.813	112.612	119.25	146.49	167.488	180.373	184.295	220.635	239.145	271.296	258.971	300.847	327.971	279.265	269.599	262.981	236.052	212.103	181.382	147.318	115.056
2011-03-13 04:51:31		0	0	0	0	0	0	1.02929	0	4.45532	3.32606	3.75824	5.45513	13.0888	11.4282	14.7624	22.3972	24.3023	26.721	34.5676	33.8603	47.5083	45.3561	58.8673	69.5869	57.6817	80.7144	99.7167	90.5385	104.366	113.071	154.133	153.091	157.907	195.683	239.03	253.175	281.364	288.822	326.548	303.327	295.623	282.133	261.763	250.122	204.205	171.08	144.127	117.254
2011-03-13 05:06:31		0	1.50771	0	0	0	0	0	0.957151	0.891045	3.32609	6.01465	2.49219	7.27849	9.68837	14.0264	17.7035	20.494	22.7754	24.0229	37.0862	32.3577	48.5394	50.2112	54.2744	71.3785	84.8449	90.2167	112.781	99.8933	147.71	153.325	155.909	187.37	220.204	241.264	241.709	283.452	297.933	297.528	314.449	292.888	282.804	238.774	242.977	204.621	162.508	135.537	131.076
2011-03-13 05:21:31		0	0	0	0	0	0	0	1.91444	1.78211	2.49451	4.50804	5.56894	8.48391	16.3207	9.86532	16.1925	23.5477	26.8321	39.9561	34.9638	41.2558	55.0654	51.9061	60.3561	70.525	90.4151	85.2564	96.4324	119.639	125.491	126.815	163.261	205.623	206.883	218.526	261.244	281.116	294.747	313.351	304.243	305.451	274.022	264.257	258.131	203.389	176.815	141.522	128.596
2011-03-13 05:36:31		0	0	1.39335	1.29022	0	1.10957	0	1.91434	3.56423	1.66296	5.23949	6.08067	7.31574	11.4282	15.3343	19.6354	21.8287	25.6144	31.6739	33.4885	41.5651	42.2282	55.3474	60.0484	75.1821	78.0071	93.8401	94.4939	118.62	126.182	149.806	174.171	187.965	230.497	230.367	253.818	276.683	294.828	305.547	278.057	307.522	282.859	270.032	226.701	211.935	193.139	149.491	114.171
2011-03-13 05:51:31		1.63123	0	0	0	0	0	2.05855	1.91436	1.78217	4.98917	6.10814	5.52782	6.81196	13.3735	13.4685	21.9453	21.0234	29.6236	34.9772	36.1506	41.5788	49.117	48.0125	59.5798	61.7647	89.6144	91.7519	98.6212	107.771	117.164	145.194	163.99	188.508	224.143	233.468	255.012	276.927	317.089	311.861	301.548	298.558	284.503	256.903	233.53	217.338	175.104	141.635	116.226
2011-03-13 06:06:31		0	0	0	0	0	0	3.08806	0.957212	1.78219	2.49453	3.78721	7.06513	7.63535	14.7296	16.1023	17.4339	19.9511	29.9243	26.0266	30.2378	40.3151	47.5997	48.9115	71.1644	71.8183	74.2859	91.0788	94.7663	104.044	123.082	136.598	174.83	185.619	210.102	221.58	254.551	270.409	295.447	322.029	306.092	318.926	275.122	264.353	238.76	201.456	161.825	146.184	120.256
2011-03-13 06:21:31		1.63117	1.50779	0	0	0	1.10955	0	0.957112	3.56439	5.90266	5.16337	5.25125	7.95532	9.63603	10.2223	21.7573	22.7316	24.2101	26.3476	42.3378	46.1769	45.3314	52.2913	67.3603	61.5054	82.7897	90.2933	90.4449	93.7224	118.963	153.387	170.343	178.119	219.053	250.637	254.309	286.596	285.909	285.288	309.573	295.565	289.167	256.268	238.78	196.973	174.834	135.647	111.481
2011-03-13 06:36:31		0	1.50767	0	0	0	1.10941	0	2.87136	3.56423	2.49455	3.33119	8.43106	4.73869	14.5557	13.6423	17.3655	19.0589	28.862	33.3865	30.0615	42.4965	42.991	62.1189	58.7167	73.8218	83.9308	100.035	95.3038	93.8679	120.116	146.905	171.202	189.814	228.824	242.636	264.758	259.481	291.929	307.804	286.941	298.624	283.638	275.719	230.533	209.427	174.748	153.305	126.54
2011-03-13 06:51:31		0	0	0	0	0	1.10957	1.02929	0.957173	1.78215	4.98904	7.53449	6.99083	7.04061	9.56449	13.046	20.7101	22.1599	30.2814	29.0667	34.9253	40.1571	47.4516	49.3763	64.4923	69.1103	78.0622	98.0452	99.7147	122.206	135.484	130.01	159.389	191.825	205.639	221.921	245.621	281.072	307.232	290.443	301.665	318.077	280.87	233.994	224.053	193.479	183.542	143.46	118.017
2011-03-13 07:06:31		0	0	0	0	0	2.21915	0	1.91444	1.78221	4.15766	5.95795	5.02429	5.50224	12.1714	9.87042	22.8087	21.9776	28.7634	28.231	39.9628	33.4625	37.9571	63.7558	50.3756	62.8795	79.7577	99.2529	109.114	120.749	131.865	153.105	161.901	192.105	200.062	213.185	250.715	275.312	289.449	272.045	303.592	269.583	275.797	250.551	212.091	215.256	172.061	142.64	110.874
2011-03-13 07:21:31		0	0	0	0	0	0	1.02931	2.8712	4.45545	2.5843	5.2092	9.66196	6.73679	12.7288	13.4737	20.1208	27.9181	25.8415	31.2089	37.1997	42.0702	52.3186	50.5878	53.0577	66.7429	75.0244	79.924	99.9997	100.918	118.918	133.804	166.212	177.348	189.201	221.526	244.171	259.489	291.529	289.858	309.505	282.746	262.745	253.357	225.389	199.355	155.226	139.787	115.692
2011-03-13 07:36:31		0	0	1.39321	0	0	1.10965	1.02937	0	5.34644	6.65202	4.56167	11.2927	7.10821	15.2474	18.8856	20.1862	23.1044	27.623	30.7215	43.6404	37.4314	46.6926	51.8554	53.9173	70.9138	83.883	86.3096	97.1615	121.19	123.746	138.89	153.025	168.884	201.454	247.514	237.007	264.92	274.894	297.526	301.779	288.964	278.167	259.147	222.274	192.931	169.177	144.171	102.612
2011-03-13 07:51:31		0	0	1.39339	0	0	0	0	0.957353	1.78233	6.65253	8.34526	7.65901	9.68593	15.2646	19.345	20.896	22.869	29.9351	30.3898	42.7465	38.7506	43.1471	55.1686	64.0494	67.1029	72.2333	98.483	102.904	97.5551	128.553	145.425	138.207	172.76	205.348	225.19	230.577	263.005	294.333	282.336	304.974	292.854	252.69	246.186	215.928	175.317	161.44	149.075	117.041
2011-03-13 08:06:31		0	0	0	0	0	0	1.02933	2.87184	2.67352	4.98962	4.82506	8.88019	18.6353	8.13596	9.93676	24.2632	18.4903	26.7923	34.4128	32.5532	40.1304	44.1401	54.6881	63.5785	66.2881	77.6301	90.4529	94.3856	107.388	116.438	141.382	147.212	164.715	178.097	233.75	244.563	241.587	289.85	312.216	295.451	274.902	250.354	249.545	224.82	175.669	163.51	140.2	132.961
2011-03-13 08:21:31		1.63119	0	0	0	0	0	2.05849	0.957292	2.6734	7.56631	10.533	9.90609	16.6055	15.9377	17.8224	23.6414	18.3397	25.6593	29.0611	35.4721	40.0407	46.9321	56.7913	58.1013	69.1734	73.0731	96.8327	93.4821	107.447	116.493	151.39	133.736	167.27	196.919	208.904	224.199	260.521	295.501	280.07	277.83	305.052	271.879	243.64	209.772	192.724	171.879	132.56	107.206
2011-03-13 08:36:31		0	1.50793	0	1.29024	0	1.1096	0	2.87171	1.78225	5.13221	11.571	12.4216	12.1806	12.8177	22.5204	22.8297	25.5593	34.5144	31.724	37.4401	48.3436	55.3272	49.1173	56.3458	74.5628	86.6827	91.7487	92.5458	93.759	116.059	142.454	145.817	173.54	195.419	218.471	213.634	261.611	281.476	263.912	283.772	284.796	248.938	246.643	211.448	190.918	160.371	135.301	117.518
2011-03-13 08:51:31		0	0	0	1.29029	0	2.21955	0	2.15949	6.62449	9.53074	8.56824	20.8809	18.1044	14.4434	22.7216	19.1873	27.3676	30.0002	38.2423	31.6546	37.767	51.5663	62.8446	49.7651	69.9503	80.4619	90.9708	104.37	93.2872	118.906	138.103	151.877	156.452	199.181	216.336	255.976	243.327	268.987	280.266	266.192	275.122	255.629	240.479	225.026	198.76	159.267	143.251	113.036
2011-03-13 09:06:31		1.63137	1.50797	0	0	0	4.43897	4.11747	3.82946	12.1918	11.2192	28.8716	28.5633	26.1278	22.9183	31.5311	32.1679	29.7256	35.5343	34.5663	41.6593	43.5038	44.7994	55.5891	62.1465	71.4038	83.3663	82.1346	95.441	107.469	111.681	117.744	166.276	188.87	190.525	220.907	251.438	265.353	255.896	272.338	271.827	257.945	245.459	226.496	231.082	206.793	172.694	151.018	117.297
2011-03-13 09:21:31		0	0	0	0	3.58593	1.10968	4.11766	2.87179	8.91176	10.8113	9.80891	22.2314	19.2333	13.9933	17.2015	17.3573	31.395	26.6663	31.8984	34.233	41.3801	46.2615	46.151	61.2353	72.3	70.1455	79.5163	103.711	110.91	120.254	131.723	152.308	173.834	193.616	224.647	245	261.575	264.393	274.998	269.231	267.542	255.992	243.502	223.86	206.408	167.426	128.602	119.797
2011-03-13 09:36:31		0	0	0	0	0	1.10963	1.02937	0	6.23808	4.98978	9.04554	18.8476	14.2046	14.877	21.4381	24.5859	21.722	21.3606	27.0829	32.974	47.1487	43.6381	55.1468	62.184	56.0301	85.1817	90.9657	96.0426	109.933	121.012	143.371	155.667	174.766	214.083	245.304	236.931	252.334	250.609	274.431	265.719	256.33	255.142	234.269	214.988	195.192	173.143	126.715	123.844
2011-03-13 09:51:31		0	0	0	0	1.19511	1.10957	2.05871	1.9145	3.56439	2.49499	5.97378	3.97032	9.97449	10.1259	17.3608	21.3948	18.2428	26.1222	31.1825	29.1965	38.6163	48.9843	58.6817	58.2301	77.1385	72.0176	81.3708	96.1061	101.74	108.818	134.481	154.692	177.223	185.855	208.129	227.284	242.61	261.819	275.853	273.215	270.549	267.496	252.927	224.014	196.198	173.856	137.33	116.868
2011-03-13 10:06:31		0	0	0	0	0	0	0	1.91454	3.31308	3.56115	3.73016	6.23388	7.07635	14.6052	14.8383	21.7266	20.8628	28.6082	29.132	34.1026	45.6881	41.2683	54.7266	61.7994	64.8933	86.8436	86.7529	87.5804	121.168	110.662	129.842	131.558	187.029	199.357	213.287	239.485	251.546	275.505	268.285	280.102	273.317	262.009	232.208	212.154	198.778	160.403	141.082	114.094
2011-03-13 10:21:31		0	0	2.78714	0	0	2.21953	1.02945	0.957391	0.891186	3.32689	6.04843	7.14548	10.9388	6.2308	17.0857	17.3423	22.1048	31.4483	33.7397	38.6792	40.191	48.8692	53.1853	57.8913	71.4058	80.5862	81.0721	90.7429	119.217	122.891	150.246	161.19	178.488	204.061	224.752	226.617	243.612	260.743	262.716	264.096	272.384	276.853	245.767	221.548	211.807	152.358	139.99	115.08
2011-03-13 10:36:31		0	1.50821	0	1.29062	0	0	1.02945	0.957471	3.28048	3.59269	9.17981	3.86644	7.06724	12.1958	15.4692	18.0427	17.1849	33.1506	29.3908	28.7091	38.4891	39.8462	47.6404	63.8978	65.8824	74.3481	94.7769	95.2288	102.619	140.553	126.396	164.852	172.152	193.872	225.713	222.861	256.248	294.964	283.117	286.535	290.847	267.875	240.929	221.839	193.584	166.264	127.931	116.976
2011-03-13 10:51:31		0	0	0	0	0	0	1.02953	2.87218	2.67394	4.99032	9.39747	5.30401	15.1046	10.8886	15.0104	18.3352	19.1599	20.3936	33.1936	27.0543	45.9199	43.2798	53.1737	57.3263	68.8827	79.308	82.6936	87.542	98.9907	113.417	119.62	148.357	184.747	179.363	211.654	248.219	273.157	253.88	280.745	285.875	263.936	265.689	234.948	221.847	189.026	166.801	129.848	122.404
2011-03-13 11:06:31		0	0	1.39371	0	0	0	2.0591	0	2.67406	2.49527	2.46096	8.81532	12.7769	14.1968	17.0894	17.8644	26.4788	32.3949	32.8612	36.4378	43.4138	47.1942	51.8186	65.8587	61.9404	68.6179	93.9035	98.824	105.456	121.242	158.133	154.956	189.032	181.769	218.574	257.552	247.412	271.428	284.221	274.992	267.772	249.806	243.648	229.752	191.877	159.588	139.559	119.043
2011-03-13 11:21:31		1.63179	1.50843	0	0	1.19559	0	2.80647	3.32913	7.84304	9.1458	5.99788	18.5319	13.7441	18.9917	20.6082	25.1625	25.7817	32.5083	35.4288	41.1099	42.7788	52.8058	59.6853	59.3378	61.4603	83.5939	95.1641	98.2128	108.697	130.383	132.011	168.64	162.089	186.58	207.254	226.983	269.531	259.163	298.373	289.351	268.365	290.018	255.268	213.57	196.743	172.175	142.568	109.737
2011-03-13 11:36:31		0	0	0	0	1.19553	1.11004	2.05934	0	7.1317	2.49557	6.78926	9.08907	13.7612	15.6174	17.1951	22.4125	24.7157	31.5665	39.2766	35.2981	39.6744	40.866	53.1404	52.9218	72.7548	73.4321	75.4212	98.8811	102.95	117.83	142.255	166.769	194.828	193.89	211.005	253.003	251.316	277.45	296.987	306.663	298.257	271.621	275.725	226.551	184.609	171.402	139.251	117.181
2011-03-13 11:51:31		0	0	0	1.29083	0	1.11004	2.05946	1.91522	1.78309	5.82327	3.72987	9.14237	15.8962	10.8324	13.3481	20.018	24.5823	24.7699	28.6995	37.9901	44.4747	43.1337	58.9804	61.7481	64.6615	90.3234	95.6596	98.1247	111.825	110.961	154.138	153.908	166.683	183.92	215.248	240.054	254.675	280.615	281.29	290.038	284.443	262.917	267.514	225.07	202.963	155.941	140.158	118.295
2011-03-13 12:06:31		1.63199	0	0	0	0	1.11022	1.02973	1.13179	3.4041	2.49583	6.76702	8.45526	10.9867	17.8171	19.5983	22.8538	26.0036	28.5407	35.3	36.9769	42.5202	49.0321	48.5115	64.4083	77.7737	89.6712	98.183	98.8042	103.924	125.111	138.42	155.507	172.394	204.956	233.047	237.614	264.199	278.265	282.149	271.272	267.129	263.303	238.838	226.861	202.574	177.51	148.37	116.971
2011-03-13 12:21:31		0	0	0	0	0	0	0	0.156921	4.31183	3.32788	3.77128	8.41994	9.84792	12.705	19.3109	23.1612	24.6096	21.5549	30.7608	38.6532	41.1968	40.966	50.9144	57.3567	70.6702	79.0487	93.5247	94.7865	113.325	125.451	145.054	162.264	174.193	209.435	223.738	239.894	260.994	264.139	273.5	278.72	286.098	261.795	250.979	219.493	219.511	162.811	141.627	118.438
2011-03-13 12:36:31		0	1.50853	0	0.093742	2.30469	0	1.02983	0.161739	8.76535	6.6558	3.87647	11.1462	11.2109	10.6797	14.9415	18.3487	20.9369	21.9213	35.2308	39.7106	36.0795	49.5144	49.7038	47.7574	65.1647	77.1494	89.2051	93.667	115.161	122.66	138.898	160.014	180.322	199.004	220.557	243.926	266.42	272.7	277.564	281.326	254.679	252.322	244.022	231.793	209.377	174.405	132.093	124.088
2011-03-13 12:51:31		0	0	0	0	0	1.11029	2.05973	0.957673	0.891705	3.32811	3.16685	10.4726	9.61811	12.5278	13.5807	20.0993	18.0985	23.5781	45.9862	46.066	43.2141	44.5532	55.6923	59.1692	71.276	86.2856	96.5612	106.96	113.496	124.139	132.785	162.981	177.189	184.022	209.762	243.175	246.883	269.485	286.837	291.194	268.846	269.655	264.107	244.103	177.168	164.443	151.378	121.887
2011-03-13 13:06:31		0	0	0	0	0	2.22015	1.02991	0	0.891545	5.82417	6.0241	3.28984	11.5563	10.3126	19.7117	21.2748	28.4301	29.3261	25.8119	34.7228	40.7173	46.0885	45.3013	56.6708	69.349	78.5378	90.1654	88.4554	114.506	124.207	129.333	149.643	182.163	198.47	196.028	238.217	263.269	266.725	296.953	288.055	283.54	261.146	241.635	235.968	179.623	156.186	126.448	112.138
2011-03-13 13:21:31		0	0	0	0	1.19601	0	0	1.91556	0	4.1601	7.50407	7.50763	9.68981	11.3004	16.5463	25.8825	33.4321	29.8802	30.6831	32.3208	41.8872	43.7869	49.3064	62.2375	59.1298	69.6923	95.208	95.6567	119.866	117.528	143.896	146.49	180.132	188.976	209.155	255.094	240.673	294.457	269.463	292.154	279.946	266.564	232.849	236.955	192.24	154.303	138.963	100.388
2011-03-13 14:36:31		1.63219	0	1.39429	0	1.19599	0	5.15022	6.70494	12.5488	16.5818	14.5464	22.1647	26.0891	18.3047	25.5885	27.5738	26.4878	29.5703	38.9099	36.8987	44.0016	44.7571	49.6016	61.7458	80.7744	74.2516	92.6577	83.1917	112.894	121.617	143.714	151.392	204.593	218.816	220.609	252.099	262.746	265.531	291.25	271.931	278.183	272.771	236.488	234.936	214.004	169.723	148.405	114.881
2011-03-13 14:51:31		0.221174	1.30423	0	0	2.39162	3.3309	0	6.70506	6.72154	9.48853	8.56529	16.9455	10.1829	21.8289	15.0241	17.1769	24.8992	34.4612	26.7925	42.7067	53.0885	43.6247	52.7609	60.4212	75.8192	79.8494	85.5099	97.8673	111.764	134.087	144.295	159.213	180.715	202.987	241.907	252.144	271.396	286.582	291.318	296.829	284.027	264.045	268.666	226.803	206.264	172.097	140.363	115.054
2011-03-13 15:06:31		0	0	0	0	2.39195	3.33119	5.15035	4.88321	12.4458	11.6065	18.3901	15.6553	20.0477	19.8309	20.7037	23.7771	23.9071	32.583	35.9792	42.8446	43.7394	58.1862	50.3359	60.1558	70.5487	78.2817	94.6269	104.083	103.782	123.742	141.128	163.371	182.995	221.418	255.635	219.361	285.863	289.996	315.435	276.553	292.356	311.064	266.076	251.012	205.216	196.795	152.708	121.679
2011-03-13 15:21:31		0	0	0	0	2.39197	1.11042	3.44583	4.45827	12.0576	8.72016	22.4952	17.8979	19.5146	18.4169	27.0547	20.4263	30.6008	36.9936	32.8429	44.6551	47.6333	53.3763	55.9202	68.2186	67.8981	82.4846	99.8115	95.3067	106.679	121.494	155.248	168.722	201.176	238.858	250.272	243.187	289.127	280.904	302.486	296.857	314.293	281.344	268.319	228.383	221.797	174.071	133.882	127.36
2011-03-13 15:36:31		0	1.50889	1.39421	1.29133	2.39223	4.44192	5.15045	6.70571	11.5933	24.0429	23.3546	30.7987	29.3975	28.1715	34.7885	29.017	36.4128	32.8154	33.2375	38.2369	41.6696	57.6856	60.7603	61.6308	71.2179	76.6894	91.3846	100.912	113.935	135.224	145.928	173.349	190.881	220.697	218.327	250.481	282.756	309.387	306.833	324.99	289.878	299.752	271.068	223.327	219.096	182.779	136.833	113.256
2011-03-13 15:51:31		0	0	0	0	1.19609	6.66276	12.3622	13.4119	19.1989	33.4968	22.6657	23.2937	24.0152	26.2782	32.0048	29.0132	31.6458	32.3657	37.8272	41.8971	46.5795	62.7391	59.801	60.4686	70.3234	80.6721	83.9577	96.8513	105.446	112.374	162.322	157.127	197.424	215.495	241.34	251.587	269.473	298.225	291.416	326.439	318.708	308.029	259.952	254.896	228.992	157.975	160.871	117.358
2011-03-13 16:06:31		0	0	0	2.58231	1.19588	5.55192	3.80019	8.91824	20.5096	22.4667	24.499	27.499	22.9463	29.0263	30.481	33.3676	31.5272	36.9247	44.4317	48.599	42.4458	58.0378	53.0936	64.3282	56.201	79.7994	105.025	96.0548	108.391	133.702	161.677	162.157	193.454	202.744	264.952	267.45	284.742	298.64	311.857	318.029	293.916	304.738	259.032	259.277	216.406	194.726	155.747	118.454
2011-03-13 16:21:31		0	0	1.39435	0	4.78385	1.1104	5.82785	7.03279	7.60362	22.8618	30.8135	25.7135	21.6775	38.1154	34.8324	24.9779	32.817	33.9987	42.6968	49.6045	50.0263	58.0019	60.3519	72.3766	76.9564	87.8897	92.5849	94.9631	106.883	117.996	141.524	168.474	215.182	213.987	237.5	292.52	310.491	291.162	328.01	328.231	316.252	285.697	284.639	267.288	225.213	184.866	170.563	124.035
2011-03-13 16:36:31		0	0	0	0	2.39213	1.27788	4.99535	4.78981	12.5526	11.3653	16.2665	22.9441	21.4902	26.2151	30.6543	34.4782	35.1974	37.2776	35.5317	43.8106	40.3894	61.0288	45.4894	61.1221	86.6436	81.466	97.6295	104.418	110.908	125.929	168.648	159.563	186.907	221.172	282.22	246.735	299.559	316.444	329.093	328.202	344.939	299.888	307.215	259.501	231.871	194.279	155.805	118.463
2011-03-13 16:51:31		0	0	0	1.29125	0	1.11054	3.09046	9.57974	13.8372	16.2155	16.9478	28.7308	22.6761	24.8159	21.5224	24.8157	37.824	37.4808	44.3112	51.5038	52.5814	51.7625	59.2901	63.4564	76.4673	77.0606	96.801	116.537	121.615	126.833	151.891	190.95	181.112	242.025	231.562	291.348	310.244	315.657	329.186	331.327	332.183	326.452	274.988	265.07	223.051	188.93	147.558	130.156
2011-03-13 17:06:31		0	0	0	2.58237	0	0	0.691728	3.18828	9.80904	6.65699	16.8452	22.7252	22.0374	21.273	35.1705	37.3064	27.3862	36.792	41.2042	44.6087	52.4192	52.1074	55.9679	75.7769	78.8359	78.0699	112.058	110.591	120.547	132.772	172.654	168.664	201.404	214.88	268.86	271.01	307.737	322.506	338.186	321.994	318.938	313.027	296.248	268.253	226.781	185.511	160.461	130.138
2011-03-13 17:21:31		1.63227	0	0	0	2.39205	3.33119	3.08992	7.66321	8.02577	18.8949	10.9509	17.5477	22.5379	30.5904	24.8806	34.0558	34.5151	37.9474	32.4571	41.6958	49.8442	43.2487	54.2221	71.9526	71.6615	88.3381	90.5179	109.203	110.136	133.151	154.748	183.686	195.118	232.229	241.037	280.016	292.091	314.251	348.067	338.234	311.512	299.397	293.932	281.761	220.266	181.553	155.09	119.423
2011-03-13 17:36:31		0	0	0	1.29123	0	5.55183	4.11994	3.83141	6.24202	10.8179	13.7986	11.8391	17.2133	12.2211	23.6058	32.1426	24.9696	30.1757	44.5087	43.5728	39.1256	47.8263	60.2269	63.4442	80.8481	84.1125	89.4753	120.839	111.074	123.111	148.313	173.285	192.64	235.309	232.656	289.816	311.749	310.449	331.946	324.984	314.988	311.472	286.444	268.253	214.255	203.099	150.056	119.387
2011-03-13 17:51:31		3.26442	0	0	0	2.39223	1.11034	6.18045	3.83151	9.80952	11.5463	6.89029	10.4761	12.3135	13.0596	14.4802	24.5141	29.6154	35.9772	42.9516	39.1202	48.5308	53.634	60.2022	62.9913	72.2474	84.5519	92.2667	99.0256	114.806	137.037	143.764	172.564	200.691	220.146	262.304	268.251	316.559	322.936	329.154	322.577	291.951	334.798	290.759	255.896	215.901	191.144	151.098	124.321
2011-03-13 18:06:31		0	0	1.39427	0	1.19617	1.11029	3.09008	1.91583	3.56686	4.99301	11.4093	15.4768	16.4507	15.6778	27.5915	22.3239	36.1837	34.2045	33.6683	39.9045	39.2522	51.5051	53.1497	53.8817	82.5484	97.1365	90.4304	101.108	127.76	125.158	150.691	173.223	204.705	214.096	255.156	272.606	281.458	300.605	323.135	338.288	314.347	312.021	284.363	264.593	225.254	186.53	152.103	125.699
2011-03-13 18:21:31		0	0	0	2.58251	0	4.44154	2.0602	5.83096	6.64715	11.8482	11.5199	9.21808	13.5594	18.6637	23.9024	27.8157	33.0465	30.0539	33.1609	44.8994	49.1487	59.0577	55.1503	65.2087	72.6846	73.8981	99.35	110.11	114.487	134.361	130.346	170.477	195.944	220.773	239.93	265.777	310.693	313.82	329.769	326.827	340.003	309.191	292.32	269.723	207.416	188.37	158.241	132.478
2011-03-13 18:36:31		0	0	1.39433	1.29119	1.19605	1.11036	6.18029	7.66311	8.91734	16.5548	12.6198	18.8327	17.4552	24.0839	30.5333	32.7689	25.2496	26.6841	43.2295	44.6381	42.0894	48.2221	55.9949	63.9285	71.9176	82.3474	95.7891	102.914	100.538	145.391	168.802	171.338	190.777	207.468	251.394	276.268	272.155	309.958	339.244	349.401	323.721	292.268	293.301	243.285	214.129	179.331	151.276	120.068
2011-03-13 18:51:31		0	0	0	0	0	4.44154	5.15061	9.68196	10.1727	10.2879	16.9235	20.6961	20.3466	19.2107	27.9161	24.3281	27.5827	31.3796	42.4045	46.524	46.716	47.0827	56.4561	57.784	67.8984	83.1253	96.9163	96.0974	121.657	141.955	160.499	166.35	211.785	218.846	236.49	245.795	295.981	300.579	314.333	343.455	299.014	314.391	273.644	264.046	231.875	178.099	155.044	127.921
2011-03-13 19:06:31		0	0	1.39449	0	3.58811	4.44157	4.12038	2.8739	8.91788	15.8112	9.84862	23.2716	17.0467	22.3736	23.2707	22.9323	23.6408	29.5202	34.7458	40.0881	44.8561	43.6612	53.2029	52.3244	72.9939	84.4189	102.022	119.84	111.535	113.135	138.868	176.35	183.239	220.028	232.157	251.707	299.042	292.971	300.314	310.647	304.313	302.804	272.796	247.652	233.654	173.52	141.266	117.294
2011-03-13 19:21:31		0	0	0	1.29111	1.19604	5.55244	16.1292	15.655	26.8016	30.6289	27.9972	32.1776	39.8449	36.8388	30.5312	35.7247	40.3458	44.7135	45.1946	46.2215	59.7304	59.9917	53.6561	73.2676	77.9221	92.7958	79.2378	107.711	107.217	148.277	138.528	166.372	192.798	204.175	228.203	267.322	291.611	301.124	307.154	321.587	290.529	286.609	274.098	232.336	221.26	180.417	153.365	125.621
2011-03-13 19:36:31		0	0	0	2.63896	4.73208	6.66285	12.3611	21.0747	30.3207	36.5362	44.0151	50.5503	54.6837	50.9631	52.2606	46.3724	52.142	49.8276	50.5042	50.6596	51.4208	59.401	57.267	67.8112	81.2554	93.0917	97.5269	105.846	123.007	129.032	157.468	191.05	193.462	229.726	241.204	249.984	302.951	305.881	307.953	328.423	327.429	308.582	266.056	245.379	212.372	189.05	156.921	116.921
2011-03-13 19:51:31		0	0	0	1.2913	3.58827	11.2716	17.3574	30.7456	37.3984	55.2817	44.9119	59.3138	61.5583	64.1362	56.6317	53.5801	58.5603	54.9032	53.7676	62.5558	60.3862	65.9212	62.9583	65.5205	79.5234	93.5766	105.085	91.0237	122.43	130.076	142.5	168.378	195.503	206.496	248.796	274.054	300.976	328.196	326.423	322.099	314.974	311.14	267.983	252.558	222.941	187.522	155.387	128.748
2011-03-13 20:06:31		0	0	1.39437	1.29113	1.19604	9.99346	20.2579	15.9836	39.4266	37.7128	37.0865	42.3804	30.6729	49.7013	36.1295	41.5231	49.5147	58.5189	45.0516	65.9032	65.2487	69.5103	80.466	75.116	81.4292	95.8237	91.2228	111.569	123.851	128.051	159.146	191.851	211.26	230.701	267.65	293.72	322.958	303.494	327.67	339.122	336.022	293.354	290.056	265.896	246.809	189.547	152.518	139.517
2011-03-13 20:21:31		0	0	0	0	3.10801	9.32994	6.86545	17.5645	24.0789	28.0787	31.9868	53.2263	39.9099	40.4574	45.7535	42.6513	37.3147	45.9545	41.8321	46.3715	53.6151	64.1138	62.8888	70.167	82.8875	97.1006	101.828	93.6548	109.898	142.139	154.846	195.018	206.124	246.939	245.865	278.177	295.104	320.84	331.904	337.026	338.859	319.649	288.53	268.796	222.099	196.264	170.443	134.571
2011-03-13 20:36:31		3.26481	0	1.39443	2.58233	2.39221	2.22089	6.18064	18.2013	12.9545	14.5411	20.6781	21.7735	37.2728	28.0729	33.7897	27.7067	39.7583	37.3974	51.334	37.4686	58.7772	60.5045	65.8542	64.0173	70.9064	87.3654	101.733	108.049	100.151	138.904	159.631	203.842	199.069	251.178	262.26	307.88	309.373	336.054	342.26	298.586	318.391	299.339	293.404	270.711	228.94	187.602	169.699	122.55
2011-03-13 20:51:31		0	0	0	0	1.19617	2.22115	7.87029	12.7992	10.702	18.1816	22.6134	35.0939	24.4157	34.4317	35.5612	40.3276	33.2513	32.4436	43.4224	50.0936	43.1872	42.2032	59.2372	63.0631	69.0035	88.9016	99.1032	107.774	120.921	143.375	151.595	175.459	208.457	216.989	242.983	273.838	298.197	305.206	317.254	326.814	310.954	319.888	283.207	270.515	226.681	207.869	166.19	129.029
2011-03-13 21:06:31		0	0	0	1.29135	3.58881	4.44221	6.85859	13.0024	14.5061	13.6422	22.4251	27.0757	30.4924	22.8077	26.7418	29.4646	31.4884	37.7772	39.0705	40.7465	53.3817	49.3785	69.1058	74.0699	71.1631	93.7785	99.1099	111.01	111.138	139.579	155.431	188.636	203.387	218.564	255	265.148	299.513	315.459	311.604	356	333.756	309.615	297.202	276.04	253.277	200.799	173.359	131.677
2011-03-13 21:21:31		1.63259	0	1.39457	0	2.39241	0.145651	8.10615	8.62218	12.9405	17.5007	20.3426	21.5493	25.2648	31.4559	23.2362	31.7041	30.8918	38.7978	41.5567	48.2218	49.3599	57.9263	53.1506	66.2122	79.4962	93.3522	97.5109	99.7237	133.047	152.234	155.962	211.33	216.408	249.151	275.731	273.868	312.194	320.567	341.548	330.814	351.006	322.609	289.573	265.979	221.288	204.763	162.853	145.547
2011-03-13 21:36:31		0	0	2.78906	0	0	2.22097	4.77054	8.97574	10.7024	22.2413	18.7205	16.4633	14.5767	22.3444	17.7408	25.3974	29.8113	32.233	40.2019	46.0795	43.9673	48.6327	64.8686	71.8458	88.0131	90.492	104.209	102.244	131.792	108.976	161.082	176.967	209.223	240.715	268.798	292.564	285.122	318.049	348.221	327.91	327.981	313.207	298.413	279.513	230.621	187.522	169.285	140.092
2011-03-13 21:51:31		0	0	0	1.29149	0	0	3.09034	1.91609	5.35109	19.9744	12.9779	15.5271	21.0787	19.9734	25.7029	21.2454	32.8587	27.1954	33.1263	47.5865	51.2006	47.7734	54.6776	60.542	74.5853	92.4593	97.2843	127.229	127.612	137.208	146.659	183.341	193.115	252.7	265.719	297.476	294.688	318.466	349.353	341.362	329.657	305.475	294.169	274.866	229.331	205.229	156.078	145.645
2011-03-13 22:06:31		0	0	0	0	1.19628	2.22115	6.18087	4.79	6.24317	8.32292	12.2076	13.4874	11.9199	19.9273	17.505	20.6729	27.7502	27.1062	37.9244	44.7346	42.3833	56.0026	68.4224	69.4128	77.0856	84.7029	103.151	103.501	111.993	140.968	161.42	189.247	197.44	232.634	269.445	303.089	318.526	315.95	333.997	324.942	331.391	335.279	298.029	269.916	230.118	203.722	143.592	133.161
2011-03-13 22:21:31		0	0	0	0	1.19613	1.11042	0	6.70596	8.02696	11.5375	10.7813	14.7207	11.442	19.6812	12.6471	26.2722	32.6494	30.7202	37.317	49.8519	48.3567	53.0516	59.2413	61.5173	73.2593	89.6753	102.602	112.05	116.462	147.981	148.946	184.008	221.282	248.466	275.433	277.592	333.096	305.383	343.689	326.237	326.141	325.208	307.388	277.35	244.92	207.548	161.981	132.704
2011-03-13 22:36:31		0	1.50905	0	1.30697	1.18187	3.33205	3.09064	4.79013	4.45965	9.75859	10.7715	17.0907	19.9237	18.2219	25.5234	29.1264	25.375	31.8564	33.4465	45.3994	48.1022	56.4077	65.0894	73.2481	69.0147	86.1471	109.724	113.151	125.456	128.188	158.714	172.224	223.59	234.353	256.548	286.244	307.975	327.006	340.122	338.731	321.49	324.769	312.384	278.844	217.644	205.773	168.333	148.426
2011-03-13 22:51:31		0	0	0	1.29141	0	3.33183	5.15125	10.539	13.3788	18.1621	13.9804	19.4261	17.3221	15.6893	22.2263	23.5769	27.3179	31.1917	42.892	48.9487	42.4619	60.1593	63.2833	60.4763	72.159	87.8888	92.3051	117.396	122.045	134.94	164.167	182.28	204.01	229.754	282.963	288.505	302.262	333.875	343.308	347.994	331.958	326.071	298.806	269.713	239.247	200.18	165.254	134.543
2011-03-13 23:06:31		6.53074	1.50928	0	0	1.19625	1.25623	8.75429	7.06212	7.56141	9.59006	16.9555	15.5242	30.3712	29.4976	23.7534	23.7352	30.5068	26.4859	31.3672	44.4865	54.9679	54.3897	60.0362	66.3071	72.7641	82.9622	100.479	95.3987	136.879	136.006	173.167	185.729	192.907	233.095	264.125	297.117	297.137	323.074	339.907	324.827	331.478	316.366	310.38	263.171	239.077	202.043	168.173	141.599
2011-03-13 23:21:31		0	0	1.39471	1.29141	0	5.55353	6.18224	4.79093	12.8639	17.1302	14.506	15.2055	19.0373	20.1238	16.9029	23.8816	23.3698	29.4337	32.9571	36.4356	46.1734	51.4436	64.9199	70.5853	75.3897	101.09	109.266	123.67	127.047	140.142	168.315	170.21	194.934	221.23	248.055	283.141	304.243	317.224	322.84	340.933	330.708	336.103	300.004	262.506	237.71	193.203	162.516	136.174
2011-03-13 23:36:31		1.63273	0	0	0	0	3.33218	1.03033	5.85468	10.1174	9.61202	9.92535	11.6856	9.07657	13.6842	17.2714	23.1422	27.8335	36.5599	32.9683	39.3638	43.3792	53.4176	53.149	66.0708	72.6429	92.1506	89.5253	107.084	118.093	127.583	156.385	187.444	209.107	217.538	274.545	293.998	274.341	324.266	351.929	328.756	324.721	306.801	314.493	258.526	222.694	199.517	162.512	159.483
2011-03-13 23:51:31		1.63255	0	1.39451	0	0	2.22136	2.06058	3.94263	6.11641	7.39369	8.58958	15.0854	13.2344	21.2696	23.4652	20.6985	25.5062	29.4431	33.3558	41.016	43.8244	46.05	51.883	63.9516	69.999	79.4337	90.4282	94.9449	110.645	139.996	147.668	176.54	214.637	231.663	261.829	265.533	316.913	310.343	324.994	306.44	313.818	315.827	296.342	268.54	228.516	200.641	166.53	143.137
2011-03-14 00:06:31		1.63283	0	0	0	0	0	3.09111	7.7484	9.73487	10.8208	17.5637	22.7943	28.1156	17.0633	24.8638	28.5631	36.3484	33.9872	41.4481	41.9372	53.8381	43.5051	67.1676	65.5853	72.6183	83.2189	100.907	101.212	125.104	123.195	160.533	170.817	226.18	260.487	253.107	310.944	307.564	305.627	303.147	312.871	319.529	312.734	298.98	269.179	259.255	199.513	161.693	138.984
2011-03-14 00:21:31		0	0	1.39479	0	0	2.33251	7.10917	7.66519	8.92013	9.98824	20.775	16.4228	22.6189	18.1325	14.7672	19.5549	23.0327	33.125	34.7888	41.7359	43.8795	54.1417	63.4208	65.024	80.6356	85.1494	91.3679	104.801	106.887	136.054	151.396	172.112	207.838	208.928	252.646	287.075	287.412	307.822	335.003	360.83	329.968	309.283	296.847	258.444	223.546	186.689	152.406	131.386
2011-03-14 00:36:31		0	0	0	2.58303	3.58875	2.22136	4.12106	8.68458	10.6465	9.84776	22.5297	23.731	20.3674	35.8349	26.7398	30.9169	24.7975	31.5515	36.7974	40.3087	40.033	50.6904	61.8881	67.6535	73.9119	79.3404	103.064	94.2926	110.941	128.768	150.393	189.796	208.003	246.863	258.638	276.907	293.277	333.022	317.011	319.211	315.627	303.976	302.564	265.351	242.093	195.154	151.216	136.863
2011-03-14 00:51:31		1.63289	0	0	0	1.19641	1.11076	4.12138	8.62381	12.4883	15.8157	16.9238	27.5701	25.5082	25.6661	31.3678	25.0865	32.609	39.6356	37.5006	42.6654	44.6083	51.7535	57.1548	57.933	72.4452	77.3548	107.597	114.011	125.196	139.397	163.824	154.143	207.907	207.178	233.88	296.947	312.328	326.327	336.103	333.096	338.128	305.707	304.804	259.447	240.988	203.54	171.498	146.3
2011-03-14 01:06:31		0	0	0.581853	0.752663	1.19641	1.11076	0	5.74875	5.35215	9.98869	15.2496	18.0852	17.1925	14.0908	17.5332	26.9109	25.7005	18.1869	44.5093	43.1965	45.5317	46.7686	59.7542	64.0375	73.6958	89.6468	90.1644	104.445	122.788	135.438	154.665	178.341	189.475	233.466	256.763	292.474	285.551	338.17	332.571	313.852	341.026	302.895	282.117	261.11	225.627	190.587	170.078	134.848
2011-03-14 01:21:31		1.63293	0	0	0	0	1.11072	3.09109	0	2.67614	5.82689	7.59199	12.0746	6.31856	11.7752	12.5016	19.4457	20.2618	27.6042	33.0615	35.9311	47.4138	48.5551	58.124	69.9067	72.7314	82.2558	86.9676	99.609	110.429	154.679	139.589	193.428	192.42	226.479	232.081	282.007	298.606	321.917	330.372	330.897	328.208	294.429	292.558	265.535	231.659	192.274	161.693	134.293
2011-03-14 01:36:31		0	0	0	0	2.39307	2.22155	3.68327	3.28256	4.46058	7.33042	5.3249	10.4643	13.7583	16.5451	14.5821	23.9673	30.7382	32.2183	31.1677	39.951	48.9811	49.4378	58.9035	66.3699	67.9317	86.5119	100.454	101.542	125.074	133.307	143.323	189.996	174.381	244.495	247.618	282.688	307.129	311.206	319.794	326.462	321.019	321.865	299.03	261.502	234.601	213.918	156.767	149.313
2011-03-14 01:51:31		0	1.50952	0	0	0	1.11074	3.70657	3.26099	5.72785	2.97963	9.8884	6.21769	10.9918	8.16779	18.1689	19.6855	22.4646	33.8772	33.3952	34.0337	42.7439	51.3224	55.8308	63.5167	78.4478	82.7125	97.7317	105.858	110.374	142.105	157.67	165.068	168.474	235.385	252.071	259.686	264.437	323.994	344.125	344.295	329.292	319.519	318.852	272.57	222.208	194.038	157.734	138.305
2011-03-14 02:06:31		0	0	0	0	0	3.33215	2.06066	0	5.76048	4.6133	8.3351	6.28609	12.5392	13.7508	10.2686	19.4238	22.2338	29.0849	37.4276	41.6737	42.5532	45.8628	53.2978	50.0375	73.5487	81.967	103.012	106.004	126.312	143.987	144.249	175.613	193.588	218.233	240.427	259.982	287.524	310.12	343.125	332.984	320.473	347.776	281.42	290.367	230.519	208.413	170.805	125.224
2011-03-14 02:21:31		0	0	0	0	0	0	0	7.66561	0.892029	0.832391	5.30003	5.15109	7.26487	9.06946	10.7873	12.7418	20.9964	28.903	35.2157	45.4571	42.5702	51.5346	57.0272	59.2817	72.0577	80.724	95.5353	98.6362	116.254	133.604	141.641	176.785	203.57	236.735	263.279	260.132	290.351	319.84	328.769	303.095	327.215	313.892	277.919	248.365	241.556	204.868	172.843	128.822
2011-03-14 02:36:31		0	1.50944	0	0	0	0	2.0608	0.995109	3.53394	1.66492	9.21933	7.6841	12.5147	11.4415	15.9375	20.1358	24.2536	25.6654	30.3804	35.1837	44.6244	37.4603	60.8583	66.1923	65.0558	89.7824	102.973	96.0663	97.7869	134.251	150.697	162.768	191.05	234.519	244.05	284.096	307.306	305.467	334.731	338.657	354.926	316.803	294.281	257.708	232.035	197.668	160.663	137.528
2011-03-14 02:51:31		1.63305	0	0	0	0	0.130611	0.909135	1.91627	7.13628	4.1617	4.49378	4.89045	10.385	10.7257	12.8901	21.6276	17.0658	33.7465	23.9968	40.9763	39.3465	38.6048	60.8436	67.1571	74.4708	81.1686	101.161	102.503	110.195	142.514	140.162	174.062	207.356	234.056	256.19	264.75	317.398	307.74	325.054	331.67	326.638	299.625	275.487	246.955	230.897	184.752	159.327	138.065
2011-03-15 08:21:31		0	0	0	0	0	0	0	0.958093	3.56779	1.66464	5.38593	3.98603	5.58045	10.0288	12.774	16.8227	28.9537	30.2854	44.7506	52.5846	76.591	83.7381	78.3035	89.124	108.46	108.82	114.99	112.612	141.524	154.646	177.971	203.992	213.513	271.761	282.871	364.808	361.026	375.949	416.455	392.029	405.66	349.115	337.641	297.853	266.511	222.484	195.136	161.58
2011-03-15 08:36:31		0	3.01849	0	0	0	0	1.03023	0.958173	1.31869	7.09276	5.20157	6.84776	5.8501	8.6434	17.9006	21.4485	24.0401	25.9127	40.1936	50.5686	64.5215	78.0173	104.08	102.705	111.032	104.842	118.936	132.212	146.338	164.72	170.395	200.354	227.696	265.096	305.465	329.029	355.353	394.077	405.372	389.215	394.673	360.33	339.321	311.354	269.399	236.619	205.944	164.339
2011-03-15 08:51:31		0	0	0	0	0	0	0	2.87442	0.891926	3.32913	8.40026	8.79878	8.65093	7.86535	14.5493	16.913	21.0124	34.3837	37.8202	46.824	64.7994	74.5253	80.3699	99.5692	101.968	111.601	130.129	152.296	146.895	163.431	197.005	214.237	229.826	273.093	292.424	319.71	361.119	410.157	390.426	387.433	387.401	392.753	322.795	318.405	260.475	244.986	207.736	171.506
2011-03-15 09:06:31		0	1.50923	0	0	0	1.11062	0.634054	4.20077	1.78397	8.03519	6.43564	11.3089	7.77567	11.7355	16.6899	17.1579	22.5433	22.8538	35.3929	60.3426	58.9538	78.8022	88.8965	99.6356	102.953	111.903	128.7	123.107	144.621	170.725	173.025	210.859	225.585	257.929	326.122	334.625	394.029	403.663	406.269	422.897	384.484	365.67	320.054	297.296	281.348	225.327	210.707	182.636
2011-03-15 09:21:31		1.63287	1.50913	0	0	0	2.22133	3.09093	3.83231	0	6.65894	7.58654	11.41	8.90388	15.1157	16.6062	16.808	22.4731	30.8396	44.1308	48.0128	67.2766	73.0407	72.9141	113.517	109.362	102.323	122.144	147.548	143.668	156.492	189.517	215.793	272.664	269.269	296.783	356.609	360.529	394.891	396.846	400.083	412.571	360.885	351.333	287.608	273.229	224.455	198.84	167.017
2011-03-15 09:36:31		1.63267	0	0	0	0	0	1.03025	2.8745	3.56795	5.82625	4.52173	10.4605	9.15388	13.6062	21.004	22.2498	30.9097	24.6312	35.5506	56.5141	67.5756	80.5788	100.636	106.51	127.033	112.578	122.846	135.425	135.603	159.852	167.46	210.178	240.379	289.135	284.732	333.571	384.189	390.99	390.071	408.41	401.513	347.135	316.839	303.666	270.573	220.248	182.202	151.032
2011-03-15 09:51:31		0	0	0	0	0	2.22123	2.06042	3.8325	4.45974	3.3292	12.9686	10.3427	12.4456	12.4758	19.6984	22.1577	38.9442	32.8561	37.6894	50.8724	78.3346	70.7067	97.1878	104.59	108.19	117.768	146.178	150.008	136.308	145.873	185.889	189.293	220.605	264.151	301.837	349.163	351.179	413.151	406.849	390.83	380.179	367.596	348.699	293.101	253.243	224.631	186.238	164.569
2011-03-15 10:06:31		0	0	0	0	0	0	1.03023	0	5.35141	9.855	8.44628	7.59846	11.1171	18.3558	14.7985	25.2732	27.3734	34.5795	44.8625	54.5324	63.0949	82.8426	89.966	104.343	112.626	122.118	132.041	127.788	127.526	152.722	176.556	194.854	228.363	245.765	318.065	337.199	375.622	405.814	395.923	420.724	400.317	371.032	347.064	328.064	271.857	231.747	184.429	169.932
2011-03-15 10:21:31		0	0	0	1.29137	0	0	0.652625	1.30915	7.13529	7.49061	6.77131	10.5464	13.3046	15.1789	22.2947	20.117	25.0349	40.874	45.816	66.0942	76.5647	70.5958	83.9119	90.8266	112.273	126.06	135.146	130.126	129.315	141.15	181.53	186.47	236.593	290.298	306.282	325.994	371.468	383.571	392.295	391.282	414.926	367.647	346.372	293.357	253.343	222.44	198.339	150.96
2011-03-15 10:36:31		3.26532	0	0	0	0	4.44212	4.75683	4.19878	5.35163	3.3292	6.66103	9.21173	10.0647	11.8395	16.3349	29.9046	24.5052	46.6064	51.0308	62.5644	57.2929	84.199	96.9792	102.443	112.184	112.617	123.305	131.681	126.388	142.398	170.254	188.492	212.756	288.215	308.275	321.833	372.827	372.946	408.487	379.522	381.314	357.644	321.304	278.452	259.89	217.793	185.491	153.109
2011-03-15 10:51:31		0	0	0	0	1.19623	1.11056	2.0605	2.8741	3.56763	4.99369	9.23192	7.52497	7.73295	14.2465	13.7606	18.6556	25.4125	28.6791	46.9061	56.0042	61.6263	75.099	86.7763	98.8856	127.398	115.835	112.967	135.072	133.566	160.026	179.676	205.279	221.264	251.042	293.019	331.327	356.218	376.561	372.109	379.747	390.506	345.734	330.337	295.998	256.967	224.093	183.744	162.528
2011-03-15 11:06:31		0	0	0	0	0	1.11066	1.03035	2.92372	3.52228	1.66474	5.28071	9.17615	13.0554	5.88186	10.8187	19.4597	24.2125	33.2295	38.8151	51.1676	67.0596	78.7087	87.6824	103.649	111.927	104.758	127.384	136.545	147.602	156.384	187.22	188.265	237.664	257.316	289.187	326.147	330.92	386.135	382.369	383.272	382.856	365.09	332.599	298.632	249.8	210.613	191.767	161.991
2011-03-15 11:21:31		1.63287	0	1.39453	0	1.19631	2.22133	1.03017	3.87888	5.30846	4.1616	8.36288	9.08083	11.6902	10.5777	17.229	16.9074	25.8069	32.9603	30.2819	53.5474	64.3337	72.1612	91.8532	96.3388	113.433	111.364	127.929	145.981	157.698	155.639	162.328	207.857	229.962	270.01	260.501	326.051	346.115	353.769	368.538	366.968	358.651	352.788	309.587	307.971	263.143	200.453	177.414	158.63
2011-03-15 11:36:31		0	0	0	0	0	0	1.65946	3.2475	8.02817	4.16196	4.51067	8.42974	8.90468	8.76279	14.6046	25.3007	24.4509	32.5904	35.0115	59.5423	68.0622	77.3891	75.7112	106.526	112.2	111.447	135.226	117.879	142.716	151.993	177.065	189.463	228.347	248.95	259.145	336.881	332.08	364.301	378.131	381.205	362.516	336.071	329.26	294.744	251.156	235.229	169.752	159.417
2011-03-15 11:51:31		0	0	0	0	0	2.22136	1.03037	2.87446	4.45997	8.83772	4.8325	12.3047	14.2316	12.6228	12.8755	16.8786	21.607	31.0419	34.316	56.4689	65.4256	70.7327	98.1968	106.952	101.677	113.782	126.787	139.778	139.906	151.296	169.779	199.335	216.454	220.865	276.867	305.002	339.974	356.061	363.965	373.628	384.737	339.481	313.55	300.182	250.946	211.034	182.109	157.248
2011-03-15 12:06:31		1.63277	1.50934	0	1.29151	0	0	2.06066	2.87452	3.98388	6.9416	5.37583	6.34356	11.4667	11.0535	14.364	19.3926	20.4393	30.3375	47.6644	47.6776	67.176	83.7151	95.9154	92.6542	102.261	99.1644	126.044	119.4	125.198	149.613	153.818	198.431	212.228	254.501	284.655	302.666	362.712	358.292	370.635	373.692	366.183	349.641	313.58	263.828	253.706	216.226	176.697	159.86
2011-03-15 12:21:31		1.63277	0	0	0	0	1.11078	0	1.91659	4.46013	3.32955	8.46266	10.3989	11.0447	14.5511	15.5664	22.9846	27.7967	30.9605	51.95	46.534	60.2016	72.8282	89.8375	91.9577	102.192	106.445	123.766	124.637	125.835	139.902	176.48	177.788	220.944	246.372	294.539	317.107	345.093	386.349	365.253	382.596	384.856	347.558	313.86	279.762	253.421	201.428	177.788	144.888
2011-03-15 12:36:31		0	0	0	1.29163	1.19641	0	2.06072	2.87448	1.78409	3.32962	6.77526	8.65263	6.67407	14.2949	13.7581	19.8622	23.2689	31.886	45.0022	47.274	54.9115	70.4218	79.9516	103.944	104.811	109.914	123.165	127.903	134.766	139.707	151.458	180.867	209.547	238.145	256.316	296.07	335.785	355.58	390.173	364.311	378.606	346.519	305.799	274.571	231.132	195.949	186.569	144.453
2011-03-15 12:51:31		0	0	1.39495	1.29177	3.58952	1.11074	4.12208	0.958314	3.45131	3.43913	8.41221	9.04734	13.7414	12.5949	16.1801	21.4479	21.7774	33.2564	41.7481	45.4474	51.5365	71.9837	82.9337	97.6311	99.1638	104.708	130.032	124.344	137.937	126.601	176.444	184.519	182.155	228.518	279.461	299.241	324.381	347.673	371.324	359.096	363.471	313.95	304.113	271.15	243.528	204.223	181.35	159.407
2011-03-15 13:06:31		0	0	0	0	0	0	2.06088	4.79125	2.67614	3.32962	3.72048	3.42878	13.9731	11.0804	18.6475	24.1408	22.8133	39.3968	48.8343	46.3285	60.7497	67.2122	75.4865	82.3827	103.05	110.704	113.539	126.823	127.508	145.725	170.643	163.72	198.103	208.428	267.41	301.316	304.219	314.629	351.074	359.192	346.013	332.359	318.159	261.606	250.954	197.953	156.224	157.229
2011-03-15 13:21:31		0	0	0	0	0	0.0952263	4.03356	0.958314	5.35285	9.15718	7.6316	10.6814	12.0352	13.1137	13.8246	21.7411	27.9747	40.1144	36.6657	53.8994	60.6619	74.8468	83.2635	95.5885	87.2647	98.4433	111.733	113.461	113.667	138.77	147.396	169.663	184.755	227.414	267.915	266.49	304.159	324.529	328.298	313.71	315.493	327.609	297.234	243.866	227.824	203.932	145.295	143.091
2011-03-15 13:36:31		0	0	0	0	0	0	2.06086	6.7074	2.6763	6.65974	3.62593	8.41769	7.95269	13.1617	18.0113	23.3181	21.2967	38.459	42.0619	52.4965	56.1112	65.8721	80.3337	89.9702	101.554	93.2433	108.515	112.271	122.017	125.751	151.142	168.113	198.734	229.405	246.669	264.651	293.98	299.646	322.984	317.344	313.918	293.057	277.422	253.986	215.164	184.201	155.887	120.691
2011-03-15 13:51:31		0	0	1.39487	0	0	0	1.03043	2.87448	1.78413	4.0026	4.74429	9.52154	13.7171	10.4333	20.628	17.9191	25.1393	28.7766	47.6407	41.1407	56.9516	72.9971	77.0026	88.2551	98.441	111.596	113.253	110.765	124.684	142.396	140.001	180.96	200.064	217.418	229.155	251.579	295.509	289.886	318.918	317.207	306.595	319.718	257.033	250.912	226.238	178.864	151.41	131.282
2011-03-15 14:06:31		0	0	0	0	0	0	1.03037	0	1.78415	2.49736	2.2273	6.82186	8.24474	7.15673	17.0165	14.4134	31.128	37.6824	36.9179	54.5478	57.75	64.6442	80.734	89.6484	97.5744	101.633	96.8994	114.673	115.35	115.859	152.17	174.469	205.761	225.611	240.511	288.886	286.148	327.862	328.788	324.266	318.862	291.038	272.486	260.749	224.503	177.829	150.096	121.867
2011-03-15 14:21:31		0	0	0	0	0	1.11082	1.03043	0	5.35256	6.65949	3.79715	5.46641	9.5625	10.1885	19.3958	19.2448	26.3856	38.3388	46.6558	39.5769	55.6644	71.5942	80.2311	98.1651	107.685	117.999	111.705	122.169	114.171	127.84	151.633	186.993	203.095	230.317	261.29	291.889	294.489	314.251	323.266	345.436	348.314	309.966	311.763	281.31	228.005	205.777	155.044	128.151
2011-03-15 14:36:31		0	0	0	0	0	0	0	5.74939	2.67626	5.65147	10.0633	12.722	12.2574	16.9639	19.8762	23.4153	25.7119	39.9737	39.9548	45.2997	63.3673	79.6548	78.1567	92.8702	106.834	115.754	117.536	110.665	118.592	123.771	139.247	159.104	204.077	223.199	279.874	271.104	302.416	304.147	320.008	318.818	298.548	289.878	270.194	239.894	207.764	173.612	146.364	132.356
2011-03-15 14:51:31		0	0	0	0	2.39285	1.1107	0	0.958353	5.35224	4.99449	10.6967	9.31119	7.7399	13.7873	18.1985	19.3279	26.6839	29.5357	43.841	41.0782	56.9865	73.0221	89.2096	84.5997	98.5205	102.267	123.804	99.4696	120.762	117.025	127.951	169.878	174.806	218.446	224.133	266.05	274.541	319.177	319.922	321.404	303.113	303.415	254.08	228.113	205.809	187.266	151.402	139.385
2011-03-15 15:06:31		0	0	1.39471	0	0	0	1.03029	2.87428	1.78386	6.65891	8.34702	4.86779	10.3743	12.8313	13.2674	22.6927	18.3383	34.8907	49.2478	50.3128	56.2417	74.6099	75.4891	82.4532	95.3343	93.542	94.5407	113.494	111.286	126.294	141.274	164.409	186.865	213.878	243.205	268.444	270.533	311.258	308.229	289.66	300.411	293.726	279.185	236.821	206.454	197.464	150.667	127.215
2011-03-15 15:21:31		0	0	0	0	1.88792	2.68974	2.06058	0	3.56795	4.16163	3.04705	7.86881	9.61606	21.4716	13.9413	16.7139	21.1392	30.8648	44.7978	48.0625	52.5173	69.3974	85.3407	86.8237	95.8763	108.196	110.605	110.795	113.476	106.279	146.166	159.419	195.032	206.158	219.848	285.567	267.304	296.849	325.269	333.981	292.025	281.687	266.841	254.004	213.856	172.912	144.834	119.778
2011-03-15 15:36:31		1.63305	0	0	1.29169	0	0	1.03039	2.8748	4.46029	6.6599	6.08042	8.20061	8.9033	13.5081	14.4085	19.2244	31.4221	35.5846	39.9353	46.9731	49.741	65.6676	79.0981	74.7192	96.8353	108.207	91.116	108.485	102.718	138.95	127.618	173.67	170.188	189.199	246.456	261.024	273.454	296.905	305.711	312.372	299.678	280.156	269.301	230.809	201.34	168.594	165.807	133.237
2011-03-15 15:51:31		0	0	0	0	0	1.11078	1.03033	1.91659	1.78412	5.64574	11.5223	10.5563	12.853	16.3295	16.7181	27.6897	32.0622	29.6604	27.7167	48.4949	50.8077	60.7766	81.3878	89.6862	87.6609	82.2811	108.643	111.028	110.959	122.308	143.826	165.431	180.879	202.077	211.889	241.09	259.842	298.72	309.984	291.22	305.182	273.696	268.932	241.238	208.79	167.466	152.812	136.601
2011-03-15 16:06:31		0	0	0	0	0	1.1108	0	0	3.56837	4.16228	6.00696	2.67846	6.24458	16.8896	15.3215	24.0736	30.8457	31.3824	32.9622	43.3901	57.0946	68.8298	73.309	97.8372	93.5292	101.753	108.641	104.552	99.8776	128.892	133.782	155.669	193.558	194.113	225.942	266.304	278.317	288.548	311.216	305.258	286.561	279.443	269.621	228.77	221.412	196.811	151.338	124.239
2011-03-15 16:21:31		0	0	0	0	0	2.22178	1.03053	0.958333	2.6763	2.49754	10.674	9.04176	6.96926	12.8261	16.0891	19.0411	28.5637	37.3571	43.2006	50.4301	57.9885	73.6667	75.7234	80.4737	96.3176	93.3968	110.388	102.246	129.042	127.129	151.522	147.234	179.694	222.771	235.196	252.967	288.676	302.346	310.703	294.904	300.517	274.697	240.256	233.315	208.874	180.024	160.607	126.25
2011-03-15 16:36:31		0	0	0	0	1.19651	1.11092	0	2.87508	3.56878	4.99545	9.10965	10.1324	11.45	17.0499	19.173	19.8458	23.1252	35.4452	41.3538	50.2663	56.9144	75.3526	77.5013	92.3308	87.5817	102.137	105.634	113.355	115.752	144.206	157.358	146.362	194.517	224.379	218.463	270.878	286.278	286.977	287.871	290.156	302.574	277.252	263.798	258.233	224.91	186.947	149.555	132.512
2011-03-15 16:51:31		0	0	1.39499	1.29177	0	1.11102	0	3.83327	1.2631	7.97923	6.04712	9.69869	10.0823	19.6635	14.3499	18.0727	26.0771	31.7021	49.3609	47.9321	53.9971	69.0958	73.3298	87.7862	101.037	113.116	107.47	124.353	130.873	130.819	130.444	147.554	172.314	206.324	235.733	280.757	298.55	290.01	314.233	335.699	304.147	304.844	259.008	245.997	211.685	190.088	160.258	143.65
2011-03-15 17:06:31		3.26622	0	0	0	0	0	1.03059	0.958413	5.35308	3.33022	8.22285	10.6688	11.7593	20.5547	17.1651	29.5212	29.9099	37.276	41.6292	48.3554	58.2237	55.1952	86.8087	65.7157	100.083	99.2061	101.29	101.978	130.475	128.111	144.501	171.114	190.317	231.41	226.777	260.122	282.502	285.725	296.873	322.75	301.022	305.359	268.818	266.462	215.899	182.258	175.863	149.032
2011-03-15 17:21:31		0	0	0	0	1.19659	1.1111	4.12263	3.83391	4.46141	3.33061	8.17112	6.28157	16.3967	16.8255	15.5078	34.2282	29.9435	28.8874	46.5147	49.5218	65.5635	73.9481	78.6692	87.0311	80.2362	100.138	107.893	110.958	131.07	124.361	144.377	152.362	202.769	214.936	221.693	253.091	265.703	324.529	281.657	286.997	286.707	297.65	280.246	244.04	210.285	188.602	158.554	144.972
2011-03-17 01:07:35		0	0	0	0	0	2.22943	0	4.05679	7.86183	4.1774	9.05468	11.5127	15.1255	15.8533	23.992	23.773	29.2226	34.1186	28.7745	32.7356	40.7192	47.3615	45.9356	71.0837	65.6731	84.95	116.37	123.972	147.602	161.529	176.703	230.843	234.497	263.117	293.412	321.776	376.465	365.372	392.263	418.804	399.99	367.638	338.538	285.13	268.642	222.228	175.539	137.464
2011-03-17 01:22:35		0	0	0	0	1.20072	2.22957	3.10224	3.84667	6.26712	7.99942	5.48035	13.5983	18.3584	18.6053	22.3249	26.1713	20.134	26.8434	36.7654	35.9199	53.5865	45.4163	63.7747	66.4045	78.3635	89.4558	121.767	125.42	153.552	156.553	186.815	195.25	226.16	277.215	280.202	324.853	365.596	374.833	414.176	396.593	374.942	367.449	333.311	311.466	258.394	211.609	158.874	135.146
2011-03-17 01:37:35		1.6387	0	0	0	0	1.11471	4.13657	6.73215	4.93663	9.38516	8.50596	12.2853	12.3808	19.2961	18.612	24.624	21.6661	33.8901	33.392	39.7744	51.0234	48.816	61.2686	76.2696	85.7157	100.061	113.149	136.434	158.235	157.708	177.62	206.662	252.927	258.826	280.21	325.891	376.24	383.34	370.615	394.106	402.824	363.929	349.413	301.859	264.339	218.864	162.498	131.49
2011-03-17 01:52:35		3.27734	1.51468	0	1.29617	1.20064	2.22939	0	2.88488	4.47609	5.01215	8.38022	12.706	12.672	16.9607	22.2909	24.0452	29.4998	38.0141	37.2224	43.0955	52.983	49.7689	57.2426	76.7984	76.1635	93.6282	113.6	132.436	152.798	167.466	206.945	227.053	258.842	251.46	287.981	316.869	381.824	376.894	396.801	390.651	392.439	363.237	341.974	314.459	254.289	206.482	172.099	133.021
2011-03-17 02:07:35		0	0	0	0	0	1.11466	2.06805	4.05859	3.38362	5.67792	7.60471	6.37936	13.024	17.5661	24.6256	31.8371	29.1729	40.8144	33.5846	43.8465	52.8256	48.3984	62.3824	75.1215	88.799	104.855	124.894	135.968	142.418	180.345	192.306	210.649	231.294	272.38	279.553	328.048	363.516	388.09	387.109	422.417	372.321	366.429	313.534	291.27	259.696	205.082	160.525	132.668
2011-03-17 02:37:35		0	1.51494	0	0	2.40136	1.11472	0	4.80827	2.68568	5.84811	10.6842	10.552	14.5102	18.3592	20.1689	21.8968	27.1675	31.512	38.5952	43.2558	44.6109	52.6266	62.9346	67.4401	87.4288	100.411	111.269	126.072	142.861	158.449	197.636	225.629	244.399	273.065	295.821	344.5	356.397	369.923	393.401	391.804	342.599	358.58	344.856	283.91	251.452	194.637	172.975	155.232
2011-03-17 02:52:35		1.63884	0	0	0	1.20078	1.11479	3.1024	0.961599	3.58128	3.98337	7.69333	5.96936	12.0168	17.8784	18.651	24.8027	30.2951	35.5811	39.783	42.5651	44.1179	48.191	71.1263	79.7144	90.6542	92.8506	134.115	127.194	146.204	177.458	177.088	218.564	242.205	264.91	263.089	326.288	374.484	367.199	364.096	377.958	380.077	354.702	305.006	281.825	275.747	202.676	169.027	134.565
2011-03-17 03:07:35		3.27747	0	0	1.29617	1.20066	0	4.13619	3.84654	5.37141	6.50795	5.3558	17.1052	13.8213	17.2231	20.5799	28.383	28.8109	31.6366	46.4724	34.3587	44.5042	56.2087	61.3215	68.8936	84.2631	90.8708	105.236	121.472	135.619	161.833	191.402	222.416	244.974	261.05	302.215	318.762	338.712	360.41	369.763	398.067	364.75	353.122	329.821	272.893	251.851	205.589	167.51	143.996
2011-03-17 03:22:35		0	0	2.7996	0.757433	0.499099	0	1.03418	3.84673	2.68594	7.51885	5.97327	20.1174	10.9448	20.3723	21.5587	31.1374	22.7059	38.5753	42.1205	47.9994	47.3458	56.8349	65.8827	65.0013	82.6292	103.034	109.305	117.837	118.872	162.183	175.264	193.452	230.449	267.492	283.359	321.359	342.138	368.01	380.804	362.125	363.587	341.263	328.696	307.168	234.758	205.981	162.602	147.005
2011-03-17 03:37:35		1.63864	0	0	0	0	1.11464	1.03405	2.88478	2.6855	7.51817	10.6176	9.04875	12.3073	17.0034	18.7494	28.1406	29.516	38.9939	41.4006	50.5404	47.8035	63.2484	62.7529	70.225	83.5923	101.307	115.705	123.59	135.976	165.06	190.477	184.588	235.427	251.911	301.909	295.891	348.186	369.583	358.968	373.135	361.205	344.542	317.888	282.292	255.503	193.293	156.931	135.952
2011-03-17 03:52:35		0.921173	0	0	0	0	1.11454	0	0.961599	9.44612	4.55035	8.95215	14.2167	14.1218	19.1985	27.8552	36.5929	36.2744	44.6054	38.0692	39.4795	41.7096	67.2051	54.9147	69.7824	78.967	96.108	122.044	128.504	145.609	150.333	182.6	195.16	210.194	266.717	296.474	301.274	321.814	355.596	376.958	363.984	335.16	345.051	337.356	291.687	252.162	217.438	183.141	147.075
2011-03-17 04:07:35		1.63844	0	0	0	0	1.11444	1.03381	2.88431	4.47513	5.01131	11.4173	8.0949	19.5132	18.7232	29.5222	28.7318	26.525	41.0372	42.9109	41.2266	52.4506	56.1888	59.5272	60.8151	77.1388	89.2689	104.597	106.474	134.739	159.792	158.299	210.437	232.191	251.598	286.348	307.416	339.372	346.035	386.92	352.785	368.609	342.84	324.17	278.021	247.271	201.186	160.403	150.489
2011-03-17 04:22:35		1.63852	0	1.39972	0	0	0	2.06787	5.76933	3.20503	7.86788	8.25856	14.8221	16.9958	21.3794	24.2073	32.9378	31.8706	30.7454	46.3785	44.8779	55.7003	58.6971	73.2907	65.5635	101.58	85.7468	110.371	106.251	138.261	143.099	172.594	229.271	210.128	265.637	266.861	313.463	344.654	355.202	367.054	362.071	362.128	347.173	312.476	267.213	257.698	210.555	174.9	138.101
2011-03-17 05:07:35		0	1.51432	0	0	0	1.1143	3.01148	1.04509	5.37013	10.7515	4.52093	9.97795	16.4005	22.3388	28.2376	27.2961	29.727	43.9609	44.683	58.0247	53.9343	65.1522	61.8619	67.8913	84.2061	93.0878	102.293	109	139.95	155.032	165.559	198.269	208.682	253.444	270.905	299.88	340.968	370.317	354.962	377.856	380.359	329.462	335.801	276.773	249.705	215.849	162.7	144.81
2011-03-17 05:22:35		1.63852	0	0	0	1.20044	1.11448	11.3728	3.84606	3.225	10.355	4.35846	13.87	13.4654	13.0281	26.7887	28.7239	27.8109	34.4641	46.5554	37.8494	57.8907	51.6917	62.8317	66.2119	78.4218	106.409	105.832	111.018	143.762	152.402	165.715	190.086	213.404	225.309	277.612	298.415	342.497	346.747	381.381	388.465	365.516	361.696	317.546	282.861	263.173	191.072	161.638	123.323
2011-03-17 05:37:35		1.63798	0	0	1.29561	0	0	0	2.88383	4.47494	10.0215	5.98407	11.8955	13.0189	17.2543	25.276	25.9375	35.1532	37.3907	42.6151	41.7859	47.0942	49.7455	63.9228	77.5478	77.4122	110.03	105.419	115.029	131.352	154.878	178.878	170.14	219.746	229.149	277.758	303.528	331.256	345.599	390.173	402.452	368.561	353.09	319.738	274.864	253.037	208.532	175.931	143.243
2011-03-17 05:52:35		0	1.51454	0	0	0	0	1.03373	3.41663	5.76917	4.17567	12.2822	8.99558	15.6078	17.9694	31.5178	24.9529	28.5523	35.5449	44.0904	46.2946	50.0035	54.659	65.458	63.5628	77.575	98.5119	99.5378	112.552	130.549	143.878	169.113	189.91	206.665	235.451	242.57	305.896	315.583	349.538	358.346	376.817	378.327	327.074	337.381	276.955	236.785	206.064	173.423	152.5
2011-03-17 06:22:35		1.63814	0	1.39928	1.29571	1.20032	0	0	2.88401	2.6851	4.90439	4.64045	11.0717	14.2361	20.148	20.4992	31.025	31.8317	35.0929	46.0885	52.149	53.8301	48.5138	58.3763	68.6885	91.6151	86.5465	117.46	114.551	121.513	146.474	165.853	194.563	212.624	254.585	258.397	288.906	313.297	362.429	373.939	379.683	387.99	324.471	299.689	284.419	254.159	212.652	172.53	154.647
2011-03-17 06:37:35		0	0	0	0	0	1.7104	2.48157	5.83029	3.57984	5.01115	9.86189	9.30006	10.8548	25.4639	34.4106	24.9257	24.2864	46.9288	40.6237	48.3651	43.7683	57.8599	61.0551	63.7663	80.4603	92.474	108.446	93.0744	124.075	140.958	157.71	168.692	201.152	232.985	244.485	283.402	350.375	350.718	335.34	353.433	357.272	348.324	286.23	274.267	230.735	220.589	173.716	135.18
2011-03-17 06:52:35		0	0	0	0	0	2.22871	2.06747	1.9229	6.26532	3.34096	8.27423	14.7856	14.5222	19.6643	23.7979	31.5647	34.1535	43.6292	37.8224	45.667	47.5946	54.8612	62.8737	77.7375	74.3205	87.4763	97.108	114.157	109.127	148.315	148.528	159.425	201.208	233.447	249.291	284.954	325.577	342.013	366.599	388.112	365.189	334.901	302.706	266.587	256.232	199.401	168.421	131.689
2011-03-17 07:07:35		1.63834	0	0	0	0	0	1.03373	2.88413	5.37013	5.01135	6.77035	10.5145	11.7228	21.1905	20.394	24.8127	29.7418	33.4497	36.9269	43.9218	50.1083	58.8571	66.7147	74.0663	84.9837	85.6702	107.994	112.964	129.888	143.682	146.26	189.407	216.667	251.028	281.566	313.644	326.83	357.817	377.571	380.881	375.638	322.673	330.551	274.912	237.436	189.802	162.837	126.942
2011-03-17 07:22:35		0	0	0	0	0	1.11446	2.06767	2.88421	2.3123	3.68901	7.54894	11.1117	15.9908	16.7771	20.0791	29.2865	38.7554	37.3731	42.0872	41.0526	53.7029	50.7128	67.2904	71.9279	85.3894	85.6103	101.034	130.343	123.294	148.774	169.223	203.952	194.339	247.678	258.021	298.442	330.731	350.846	373.426	394.253	375.865	361.346	301.951	270.565	236.06	194.531	161.332	151.27
2011-03-17 08:07:35		0	0	0	1.29585	0.104625	2.13181	4.13522	0.961317	3.21696	5.34971	2.22396	6.16375	16.7286	17.9993	26.4878	29.2618	33.9276	36.059	27.2783	36.0128	43.3936	50.4112	61.7109	65.9093	82.8478	83.6378	91.3093	108.954	111.209	146.553	150.91	158.407	198.227	206.817	248.339	296.747	315.703	346.766	370.269	381.933	362.449	324.298	296.374	260.825	237.362	177.191	173.822	141.196
2011-03-17 08:22:35		0	0	1.39926	0	1.20018	0	3.10124	0.961237	2.68508	7.40513	8.40574	6.36083	19.9219	14.9061	22.245	24.8309	25.3209	39.6263	39.4378	35.7946	54.266	53.6542	61.5679	67.7673	67.1612	81.2776	89.2247	131.572	116.02	123.952	140.13	183.011	188.636	236.216	235.23	289.888	309.323	307.742	347.606	350.183	348.154	314.167	286.276	266.344	233.033	197.087	174.668	133.734
2011-03-17 08:37:35		0	0	0	0	0	1.11438	3.10136	2.88431	3.58	3.34071	5.28548	10.4881	13.1061	24.0074	25.1302	18.2618	31.7003	32.8872	36.1558	40.8016	37.3279	53.4199	56.1942	61.6513	74.9295	92.0163	95.2343	98.5151	127.694	132.58	136.004	163.848	204.822	228.229	251.174	295.306	344.228	352.51	335.266	359.446	339.772	319.271	298.045	280.042	239.173	193.069	169.035	128.736
2011-03-17 08:52:35		0	0	0	0	0	1.11448	2.06763	4.10112	3.34247	12.528	3.00509	14.8932	11.8758	15.2444	23.7572	24.4966	30.0457	36.5587	35.5	31.2967	43.9093	52.1526	62.4587	68.2599	78.7167	75.9885	84.3381	107.973	109.169	113.723	141.344	164.74	192.52	208.107	230.14	264.747	314.095	322.462	318.966	327.583	357.885	332.474	283.365	260.791	232.22	196.537	161.428	123.862
2011-03-17 09:07:35		3.27667	0	0	0	0	1.11448	3.10144	1.92284	5.37	5.01125	9.05173	11.2921	15.657	18.639	22.0841	27.631	37.6064	35.0538	46.0006	40.9981	51.4186	53.6388	52.0131	60.3016	73.3369	80.5327	95.4282	86.8163	102.672	130.657	143.007	147.506	174.138	216.989	216.076	285.617	305.357	310.851	348.574	326.917	325.295	292.438	280.409	241.424	216.516	188.726	153.702	128.558
2011-03-17 09:22:35		0	1.5143	0	0	0	0	0	2.88418	4.47535	5.01135	5.19606	15.7019	16.9239	21.0894	24.376	32.7176	24.5571	35.7994	32.1016	40.4311	42.4907	55.3449	50.5503	62.0997	69.4974	78.95	85.2417	100.634	111.247	109.778	131.623	158.217	173.642	187.532	231.983	270.06	290.727	300.759	329.324	327.712	332.74	295.377	284.395	279.029	231.843	203.64	154.675	126.703
2011-03-17 09:52:35		0	0	0	0	0	1.68103	2.57598	1.92266	5.37003	11.6929	6.01202	12.0156	11.191	16.2818	24.9427	25.4762	26.9704	36.6571	36.208	41.5442	46.9022	48.9875	52.2827	71.0798	74.3426	75.6433	96.1801	96.5974	113.884	125.592	127.909	159.323	167.478	191.685	239.273	254.175	317.971	310.905	326.163	332.641	315.451	304.155	266.36	248.68	231.741	185.322	167.146	127.466
2011-03-17 10:07:35		0	0	1.3992	1.29567	0	2.22867	2.06711	1.9229	2.68492	5.75692	7.58119	9.65138	17.4172	16.2909	17.6753	26.9651	38.7064	34.1506	35.6763	39.966	51.4904	55.9446	59.4987	64.0676	66.8913	80.8699	94.8154	93.4163	101.311	137.67	147.093	140.01	164.515	186.613	219.802	255.955	307.676	314.828	346.446	322.465	314.379	316.126	281.863	258.602	222.606	186.092	169.91	125.831
2011-03-17 10:22:35		0	0	0	0	0	1.11412	2.00847	2.26945	5.99228	6.58933	7.67843	3.60981	12.8916	15.8818	23.1482	25.6513	29.8792	34.442	45.2494	48.6734	46.7772	59.6247	54.1183	60.8506	71.3817	85.3026	91.8452	99.4737	119.357	119.698	152.875	164.263	170.218	193.88	234.882	276.232	289.395	302.131	331.548	339.16	334.814	305.375	298.133	256.134	224.952	184.429	161.559	134.794
2011-03-17 10:37:35		1.63812	0	0	0	1.20012	1.11428	0	2.88383	3.57984	5.01048	11.4379	11.4475	19.9668	16.8756	26.7452	23.4241	29.7141	37.5375	35.8106	37.2952	46.2519	50.8798	53.8824	58.0978	63.2006	93.0074	91.1173	111.815	122.438	140.863	138.769	173.546	195.581	207.059	235.559	286.567	293.57	317.207	328.971	346.087	335.84	320.981	275.723	259.691	219.113	194.686	169.339	132.594
2011-03-17 10:52:35		0	0	1.39914	1.29563	0	0.626603	1.48576	2.88355	2.94858	8.06628	7.69692	11.6458	14.9604	16.2986	23.2361	21.8339	31.8906	30.0467	37.1375	42.9994	46.9923	50.016	65.8939	57.4141	78.8157	85.925	95.526	102.202	128.722	128.512	145.329	165.605	193.492	213.313	231.25	282.254	313.992	309.096	327.612	322.808	322.263	298.74	285.012	275.042	229.463	198.958	162.476	145.174
2011-03-17 11:07:35		0	0	0	0	1.19996	2.22811	1.03346	1.28988	2.37821	5.77561	6.10644	11.3849	11.7156	19.4641	20.1326	28.6262	29.8918	38.8946	31.9021	39.0481	50.3583	51.2705	58.6885	74.3837	74.9894	82.1115	105.241	106.736	112.929	129.225	148.381	163.431	188.914	214.441	221.452	265.984	290.819	331.702	334.545	345.76	356.125	317.061	293.327	270.637	230.194	188.53	161.935	131.034
2011-03-17 11:22:35		1.63762	1.5137	0	1.29539	0	1.11404	2.06673	0.960997	3.57862	10.0184	8.16224	11.2161	21.2891	17.1484	24.1631	37.0465	31.0886	33.5446	39.1638	43.5487	44.2154	58.7577	59.9603	76.5321	83.4029	98.3292	96.3853	104.612	113.049	141.571	152.787	157.574	192.48	231.571	252.7	267.624	294.631	348.808	331.763	361.814	336.728	315.172	289.074	258.778	231.05	196.026	170.747	146.54
2011-03-17 11:37:35		0	1.51382	0	1.29537	0	1.11394	0	1.92202	6.26237	6.67872	4.54891	5.60885	13.478	18.9391	29.6975	25.1454	29.4411	36.0234	40.626	44.616	47.9205	44.0574	69.8891	61.0468	73.6401	94.7067	107.042	103.33	110.617	135.09	151.348	168.852	205.996	222.676	252.128	280.589	318.221	332.737	337.436	366.503	336.894	310.012	284.061	273.335	217.075	178.61	160.042	140.609
2011-03-17 11:52:35		0	0	1.39866	0	0	0	4.13301	0.960897	3.57801	4.19676	12.1312	9.26054	12.349	21.6318	20.6896	28.846	35.8699	40.8141	36.0885	38.8962	45.6035	57.8292	48.5795	60.2128	67.1045	94.4808	103.788	111.748	123.438	139.239	158.924	174.367	205.988	216.961	253.343	281.34	274.437	317.147	326.404	323.356	346.038	319.127	307.745	274.888	238.642	190.381	170.545	141.356
2011-03-17 12:07:35		0	0	0	1.29537	0	1.11384	2.06649	2.88279	6.26212	2.50401	11.4872	11.5435	10.8211	20	21.7226	24.3185	27.6	30.9537	37.0179	37.2016	47.3583	50.3862	62.8446	64.4545	61.4657	83.8125	116.816	112.04	138.439	129.842	156.01	182.909	203.197	219.81	249.175	269.209	303.269	335.827	352.09	334.939	347.407	326.269	279.922	259.079	237.935	198.93	175.963	137.38
2011-03-17 12:22:35		0	0	0	0	0	0	1.03333	2.88273	5.3674	5.0084	12.1308	9.58167	19.0939	15.3353	19.5387	30.7306	32.909	33.4115	29.7554	49.8689	43.7872	53.8006	52.0814	76.5385	78.325	82.5772	110.545	121.719	120.714	158.434	163.568	180.659	202.119	233.305	222.047	293.293	309.263	309.88	323.266	352.978	352.696	297.264	298.762	265.783	233.402	202.779	172.218	134.091
2011-03-17 12:37:35		0	0	0	0	1.1998	0	1.03339	1.92199	7.15673	7.51324	8.23064	12.1279	15.6425	19.6955	21.9106	30.9279	36.8968	30.3394	38.7465	39.2	38.9458	51.9596	57.4654	77.9843	80.6423	94.4843	100.456	119.509	127.146	148.634	175.651	185.058	206.214	245.907	271.967	283.824	326.503	337.051	340.397	367.272	332.196	342.25	300.751	270.683	235.254	230.172	173.089	135.455
2011-03-17 12:52:35		0	0	1.39882	0	1.1996	2.22771	1.03335	0.960878	6.90224	6.91497	7.77667	9.88138	17.666	19.9416	17.1587	26.8181	32.4442	31.3209	39.2516	46.2083	48.7295	52.7519	58.349	72.7801	82.6567	88.2404	116.863	120.104	144.85	148.648	165.457	188.868	199.912	242.456	246.577	280.445	328.176	322.862	357.061	357.779	365.455	339.122	299.391	276.156	225.449	185.433	173.898	133.309
2011-03-17 13:07:35		1.6374	0	0	0	0	0	3.09972	6.16849	2.30795	10.0433	3.67663	12.9571	13.4281	12.7357	18.3999	21.2528	32.9801	36.5526	46.8545	44.7875	45.6494	65.3606	66.7654	74.3958	88.2596	98.4718	120.429	131.747	138.986	157.041	181.875	197.482	214.099	238.928	260.122	301.166	293.642	336.471	330.926	351.163	351.183	318.828	310.024	280.212	263.009	207.336	161.925	144.098
2011-03-17 13:22:35		0	0	0	0	1.19962	1.1137	2.06629	0.960756	4.25968	3.57186	6.14003	9.46946	13.6613	18.3426	24.614	25.1763	36.7619	39.2859	44.2042	51.176	54.2984	49.2503	61.892	71.3337	83.809	97.8913	131.749	124.667	143.828	165.321	188.844	199.181	215.377	248.606	284.85	284.109	332.625	346.282	364.599	366.42	349.497	315.923	302.52	283.93	224.505	195.579	160.248	140.483
2011-03-17 13:37:35		0.920192	0	0	1.29495	1.19954	1.1136	1.03299	2.88225	1.78884	10.1283	8.14712	10.1745	13.3244	18.732	18.6705	28.7931	25.8906	40.1676	39.801	57.4792	50.2196	58.1904	57.9804	73.9112	93.8032	95.0865	113.437	126.02	157.178	168.241	194.313	214.135	228.908	247.528	276.909	304.505	305.068	346.545	339.234	351.106	340.548	346.702	296.663	276.184	248.458	219.848	167.708	142.598
2011-03-17 13:52:35		0	1.51336	0	0	0	0	4.1324	1.92143	6.26071	7.51163	7.56724	12.2412	8.55048	20.0379	25.017	25.7817	34.983	38.042	37.9721	46.0199	55.4013	57.409	63.3981	71.775	82.3708	90.1862	110.96	137.304	139.555	169.968	199.051	200.667	242.929	244.385	277.178	274.014	323.801	330.827	344.298	350.772	349.792	333.34	302.49	261.13	252.005	206.388	173.045	145.665
2011-03-17 14:07:35		1.63726	0	0	0	0	0	3.09898	2.88219	6.26045	9.18026	9.0566	10.493	20.8904	15.4483	23.0845	26.5862	30.5705	27.8367	37.5667	41.1228	47.3051	52.5808	61.0394	75.6359	79.5022	96.7689	105.146	120.054	137.147	175.555	173.299	222.987	200.731	239.684	256.743	282.524	316.312	319.149	322.763	352.878	355.099	323.779	313.025	270.166	245.787	214.289	162.095	131.464
2011-03-17 14:22:35		3.27391	0	0	0	0	1.11348	2.06603	2.88227	8.9433	14.1881	7.52016	10.2224	18.2222	8.13699	25.7364	30.0539	24.9251	33.4215	42.8551	40.0997	45.5452	50.3968	63.2272	73.1051	77.6385	93.6311	116.104	129.822	139.337	160.663	197.867	187.861	213.8	245.319	270.741	284.227	320.647	314.141	354.747	351.769	326.635	318.131	292.334	282.64	221.743	191.156	162.186	155.942
2011-03-17 14:37:35		0	3.02658	0	0	0	2.2274	4.13244	3.84298	10.7332	14.1888	11.0322	9.90804	13.613	19.4452	25.3377	29.2993	42.0481	26.6269	35.5109	48.8003	49.6006	52.2917	68.3849	73.9869	85.0923	112.56	115.922	127.618	141.292	178.566	164.742	174.087	211.118	218.752	250.346	295.675	325.91	320.67	327.359	333.853	336.689	325.958	293.031	253.668	232.458	208.99	179.321	134.92
2011-03-17 14:52:35		1.63712	1.5134	0	0	0	3.34099	8.31888	11.4786	6.26093	10.85	18.3278	20.5819	17.4809	32.3362	27.9515	34.2029	39.3753	39.4821	45.9186	49.4667	52.4625	61.2561	76.9788	70.4112	81.9987	98.5308	114.73	122.662	139.766	149.71	149.816	160.923	200.321	233.245	255.801	267.568	302.446	300.521	327.952	306.827	326.237	297.087	290.741	255.505	219.547	196.144	161.164	142.766
2011-03-17 15:07:35		0	0	1.39838	1.29497	8.63394	4.23385	15.4958	17.2921	20.8723	30.5975	34.5388	34.7792	33.8744	39.9131	28.4435	42.208	45.509	41.2317	39.1577	58.2817	58.1776	64.0571	73.599	69.2625	79.4574	104.773	101.433	115.345	131.132	148.47	167.468	183.249	225.761	235.979	255.958	261.438	294.519	292.328	323.994	329.484	328.503	307.031	293.199	273.383	227.722	194.982	161.609	146.12
2011-03-17 23:07:35		0	0	1.3982	0	0	2.97724	2.40254	5.2816	8.33365	11.8332	9.17205	15.5671	17.9813	31.0264	23.4998	41.917	41.3378	44.5984	58.3359	51.5404	63.784	66.059	77.7551	88.4452	100.928	118.886	136.526	159.281	169.662	170.507	177.053	221.949	222.22	221.853	283.319	268.666	302.931	302.197	333.558	304.579	276.44	289.507	269.739	250.615	207.013	175.697	147.53	120.118
2011-03-17 23:22:35		0	0	1.3982	0	0	1.11342	4.2409	4.70119	6.25949	0.921875	12.6029	20.8752	15.28	38.1269	37.8952	50.4728	44.733	54.066	54.0833	54.5971	65.9635	65.892	82.8141	90.8593	106.441	109.78	134.684	139.263	159.279	175.148	206.953	222.54	245.563	240.886	273.067	289.569	309.079	314.263	296.535	287.045	302.258	280.669	262.159	234.75	199.944	186.018	150.455	109.936
2011-03-17 23:37:35		1.63688	1.51298	0	0	0	3.34019	1.03293	6.72372	4.47096	12.5162	16.6272	16.9252	26.7202	29.0721	29.9541	46.4253	39.2933	49.1654	48.7272	48.2952	68.7635	65.9635	79.8144	91.3545	107.66	117.107	130.044	147.053	176.246	190.156	194.826	218.504	233.351	225.17	268.323	296.975	307.41	320.772	334.737	291.236	297.746	278.381	274.625	248.097	204.475	190.797	152.32	130.699
2011-03-17 23:52:35		0	0	1.39812	0.931712	0.336298	0	2.06564	4.80269	5.36503	7.68513	12.5775	15.5132	18.4434	27.2905	37.1455	45.3506	36.0628	40.1984	58.8192	41.3936	61.9083	68.1029	74.666	101.203	95.7253	118.644	128.694	151.484	163.431	173.111	199.99	201.43	255.689	257.622	283.87	277.302	307.199	311.016	301.639	315.777	302.111	284.199	260.441	232.208	211.016	174.705	164.547	118.772
2011-03-18 00:07:35		0	0	0	0	1.19936	2.22674	2.06569	6.24279	10.2836	10.8475	12.9388	15.3637	27.8157	24.9164	32.7256	32.7513	46.6051	52.4128	54.6369	64.2359	74.3205	72.5468	77.3346	87.7962	104.574	106.702	136.841	144.936	156.06	168.434	193.027	240.256	237.518	246.194	293.564	305.809	322.096	295.306	318.289	348.997	291.805	276.837	252.388	234.269	208.966	167.32	147.075	122.921
2011-03-18 00:22:35		3.27362	1.51286	0	1.29459	0	1.11332	2.06553	9.60484	3.57683	8.34381	11.2149	13.9275	26.495	22.5896	25.6579	42.4288	44.7413	52.1962	59.7003	56.8038	64.4471	62.7603	79.9141	105.007	92.134	109.375	130.01	142.394	162.34	177.524	195.599	227.578	261.571	251.452	281.763	277.079	306.06	319.565	286.723	297.234	302.903	280.321	274.511	250.747	228.067	170.437	157.282	120.671
2011-03-18 00:37:35		0	0	0	0	1.19932	2.22656	2.0653	2.88123	2.68267	13.3494	15.1212	17.7229	25.5467	26.597	32.9628	41.5436	34.7375	53.0128	61.9596	52.0314	57.0683	68.1753	82.6417	87.4087	94.017	126.54	148.033	147.284	157.624	170.863	205.202	221.911	247.095	230.33	288.68	290.503	307.716	321.247	320.118	315.743	302.885	304.211	276.254	245.082	200.15	207.959	155.258	113.353
2011-03-18 00:52:35		3.27343	1.51284	1.3982	0	1.19924	0	1.03289	4.80231	9.6917	9.31247	10.2326	15.9407	19.8055	33.5731	40.4814	42.5875	47.2064	46.0474	52.1596	54.0333	66.3301	70.1625	76.1125	87.751	99.5779	106.255	150.601	141.052	151.106	177.771	198.369	236.649	241.224	261.763	291.588	281.26	307.196	330.981	309.543	318.494	312.26	286.691	271.294	252.576	222.077	191.422	143.281	117.664
2011-03-18 01:07:35		0	0	0	0	0	2.22696	2.06564	3.84163	3.57644	11.681	17.3108	14.5312	24.9401	28.9307	29.7526	39.7974	43.4179	61.5119	55.1449	47.0606	63.5564	63.6035	84.6984	92.9426	119.164	111.234	127.162	157.634	151.448	195.978	202.919	241.226	254.744	242.989	282.316	307.662	300.709	303.267	309.465	316.839	276.604	288.407	281.234	245.443	215.771	173.223	143.814	121.699
2011-03-18 01:22:35		0	0	0	0	2.39838	2.22682	0	4.80212	8.04737	7.50942	16.5771	19.2338	24.852	26.1955	32.2657	31.6286	45.2087	51.5542	52.7715	51.2343	64.6391	69.1978	76.2285	94.2875	108.638	119.836	132.488	155.214	152.921	193.071	212.147	233.502	239.603	246.222	267.137	306.214	305.461	309.944	325.426	311.947	299.319	286.172	253.093	245.084	209.223	195.198	159.281	126.729
2011-03-18 01:37:35		1.6366	0	0	2.58914	0	2.22654	2.0654	5.30853	6.68071	9.17731	11.2083	16.644	21.4625	23.837	33.0433	42.9042	48.1574	55.3452	58.5478	75.6449	69.2279	69.0497	85.2481	94.65	102.973	124.053	137.793	168.303	180.034	174.686	216.735	222.628	234.922	250.553	247.146	304.898	297.434	309.471	335.673	296.562	312.376	285.731	278.764	235.593	227.714	173.063	134.792	128.793
2011-03-18 01:52:35		0	0	0	0	0	1.91781	4.41673	0.960397	8.04583	5.13038	14.3297	22.7221	19.4858	22.3844	33.4026	32.1359	42.2484	46.2929	53.9913	66.4426	71.8093	76.1436	87.2503	98.2439	108.461	122.932	146.29	155.673	166.026	173.011	205.727	235.905	253.412	264.884	286.749	302.109	297.586	310.958	300.088	335.462	310.391	292.612	255.327	250.174	226.765	181.142	157.518	122.52
2011-03-18 02:07:35		0	0	0	1.29437	0	2.22644	1.03267	8.64253	7.95327	11.7661	12.3655	12.3788	27.4211	30.1422	25.9964	37.9135	41.1317	61.5747	51.2221	60.6099	58.1788	83.8756	95.4035	91.0542	91.6734	126.534	138.293	136.643	173.001	172.286	208.394	225.477	259.237	265.309	270.505	292.586	309.647	314.473	299.229	316.805	311.338	277.428	252.027	254.615	228.093	186.406	148.474	122.221
2011-03-18 02:22:35		0	0	0	1.29441	0	3.33958	1.03259	1.92057	7.15183	16.6846	11.9547	14.7732	19.1845	25.0451	27.1897	36.1641	43.6462	54.1978	56.8952	57.1494	58.9423	81.0423	76.6756	82.5622	101.254	125.732	149.109	141.34	161.058	204.599	209.636	216.867	245.955	279.652	268.147	283.383	304.455	316.534	324.228	307.34	305.547	295.439	273.65	260.801	213.151	189.269	160.274	127.714
2011-03-18 02:37:35		3.27304	0	0	0	1.19904	2.2263	1.03261	5.76199	5.3641	9.33288	6.33897	10.4731	21.2933	29.0258	43.1696	47.0635	41.3106	52.5	49.4003	52.3429	56.6462	69.2423	91.0782	97.1804	104.808	128.524	148.367	140.222	168.455	195.551	210.196	237.115	227.163	294.321	273.421	285.256	296.855	300.703	340.526	295.849	299.133	304.503	286.06	254.235	213.423	196.41	147.003	131.45
2011-03-18 02:52:35		0	1.5126	0	0	0	1.11312	2.06529	0	2.68191	7.50795	12.0697	13.9298	16.1675	29.0172	36.0103	47.0753	44.2577	51.4042	58.2663	57.208	66.0042	69.6333	85.4439	90.5679	106.783	123.801	141.963	155.846	171.362	186.132	207.424	226.645	231.2	273.295	281.196	289.229	296.002	326.721	344.317	331.926	315.811	287.536	286.607	255.058	214.233	181.186	165.479	135.643
2011-03-18 03:07:35		0	0	0	1.29431	0	2.22628	3.09758	3.84115	7.15167	5.98234	14.2666	16.6856	22.7867	28.9755	32.9487	36.1625	55.6337	45.3413	58.7465	65.4452	72.5792	73.7878	79.2141	83.7343	105.592	114.679	136.524	137.871	157.392	183.586	201.677	240.497	237.71	270.493	275.603	286.643	318.245	326.115	331.763	319.934	320.28	308.235	271.937	244.169	219.655	190.168	154.331	132.173
2011-03-18 03:22:35		0	0	0	0	1.19898	2.2261	3.09758	3.84099	7.87952	7.66234	10.4848	15.1256	20.0242	28.6937	38.3737	37.7824	45.0372	52.5417	38.8003	66.675	60.8535	77.8487	93.7558	100.939	100.031	110.471	140.417	143.694	163.389	189.371	203.379	217.859	242.103	267.428	260.078	287.758	310.517	352.266	314.197	320.981	314.453	288.586	286.977	238.215	231.783	179.834	151.691	122.754
2011-03-18 03:37:35		0	0	0	0	1.19886	1.113	2.06503	6.32321	9.30843	9.35115	10.3486	14.7772	24.9968	29.8902	36.1471	35.151	42.8298	51.1054	60.7375	49.0731	59.1808	68.0583	81.5724	81.3696	93.7766	120.561	141.212	155.725	155.851	177.197	187.596	215.493	227.835	256.829	264.505	276.859	296.482	335.971	326.859	332.272	326.654	298.962	272.332	249.93	221.546	185.126	157.194	127.24
2011-03-18 03:52:35		3.27234	0	0	0	0	3.33872	5.16228	3.44298	6.62696	6.86244	11.0545	18.1026	19.177	29.6777	29.372	40.5487	41.5276	49.3333	63.0083	50.7814	61.0006	70.5631	71.7019	80.2413	108.647	96.0314	127.809	156.558	167.56	184.708	210.904	208.163	227.806	266.575	289.487	300.018	309.021	307.895	325.058	319.601	324.782	289.004	285.102	258.109	213.005	187.556	157.933	120.014
2011-03-18 04:07:35		1.63596	0	0	0	2.39738	1.11284	3.09687	5.76045	13.4071	6.67304	16.8106	19.2073	20.5034	28.4088	30.6526	32.9458	46.4962	51.2535	50.1782	54.3728	66.9484	69.5513	74.8497	84.1917	100.618	118.928	137.422	152.768	167.742	197.43	198.6	218.882	229.551	258.121	276.122	297.49	299.702	338.413	317.252	334.554	328.91	276.797	277.722	229.273	199.964	185.657	153.155	123.896
2011-03-18 04:22:35		0	0	0	0	1.19884	0	4.13	1.92011	6.25654	12.5115	10.7024	18.5551	20.1558	25.8428	32.5894	51.7006	52.8125	50.1715	52.0333	53.0901	71.7176	50.5885	80.0522	86.5276	85.4468	120.884	129.491	147.872	170.631	173.764	202.899	195.563	237.59	275.413	298.381	287.188	308.267	325.519	347.436	297.644	304.87	288.556	264.353	248.842	219.748	182.6	156.991	122.552
2011-03-18 04:37:35		1.63622	1.51234	0	1.29399	1.1988	2.22616	3.09738	6.72058	6.2566	8.3408	13.5279	24.6599	23.9816	30.1631	37.0731	44.2176	41.8032	49.2263	53.2481	78.4003	56.0192	58.6529	74.709	94.925	102.125	105.02	123.324	156.452	167.262	172.107	210.461	215.649	239.443	274.293	261.851	323.949	296.458	329.609	339.641	307.56	333.183	282.877	281.689	253.892	224.705	184.854	154.067	131.843
2011-03-18 04:52:35		0	1.51244	0	0	0	1.1131	5.1617	7.68122	12.5135	16.6821	21.2474	27.7949	27.4437	43.8167	33.2769	50.651	43.7612	54.2853	53.8587	68.1827	64.4115	67.8279	82.0641	88.4458	102.009	121.442	122.294	143.001	162.318	178.213	197.793	242.896	223.241	263.061	291.24	322.128	331.606	329.452	345.484	327.34	295.314	302.712	269.173	242.576	213.267	170.581	146.174	108.715
2011-03-18 05:07:35		1.63602	0	0	0	1.19872	1.11294	7.22712	10.7194	13.2597	17.515	16.069	28.1276	35.0058	38.5808	53.1462	60.9362	62.8202	66.467	66.7968	73.2885	73.1952	83.2128	82.324	100.911	119.467	115.915	147.713	140.218	159.367	186.659	190.437	233.311	246.388	259.077	311.993	322.612	355.702	339.144	318.958	331.417	321.013	307.764	264.171	264.091	230.337	165.301	156.813	133.712
2011-03-18 05:22:35		1.63628	0	0	0	4.79548	4.45154	9.29205	11.1166	10.2088	14.3691	28.3554	41.0429	34.2779	30.7186	56.2657	59.766	64.3891	55.6016	64.2301	80.0215	77.3212	84.7103	88.1644	96.0388	99.7846	116.944	137.975	144.335	161.801	199.247	210.018	232.041	249.509	299.285	263.023	323.522	324.901	331.442	330.042	313.484	318.688	316.751	265.769	235.691	221.302	188.245	146.102	132.105
2011-03-18 05:37:35		0	1.51244	0	1.29409	2.3976	2.22596	8.25917	5.76048	9.83144	19.1828	25.522	29.8329	32.6606	35.7718	47.9314	50.7814	48.1946	59.3779	61.1567	65.9647	79.5516	82.1814	91.6776	86.3407	104.345	118.584	133.346	158.023	157.991	188.544	219.607	210.727	241.779	261.629	288.163	312.897	337.593	347.744	348.224	304.193	320.939	286.861	263.638	233.572	225.988	186.921	149.62	118.081
2011-03-18 05:52:35		0	0	1.39756	0	3.59641	3.33878	3.09704	10.5609	10.726	15.2241	31.9339	35.708	36.2324	47.5231	49.858	52.7651	72.3141	62.4272	71.8603	77.5285	71.2083	82.4929	95.2337	89.7256	107.579	119.283	120.611	145.909	155	186.132	191.587	224.405	262.31	270.319	282.188	318.452	346.506	325.397	320.475	328.955	332.365	295.096	282.65	264.379	221.635	187.422	158.536	126.873
2011-03-18 06:07:35		0	0	0	0	0	6.41897	6.43417	9.60071	11.5773	12.7635	27.616	22.4549	40.7792	45.1311	49.4779	56.1631	69.1317	58.4321	67.3122	68.9288	62.7317	79.9112	88.7554	83.3753	119.267	122.241	124.201	155.106	170.497	179.465	188.339	230.635	242.121	268.57	309.079	309.599	339.644	326.311	333.34	303.463	337.577	291.37	297.891	251.126	204.319	183.9	155.068	130.825
2011-03-18 06:22:35		0	0	0	0	1.19886	4.45199	5.16228	10.5611	15.1955	16.8696	27.5994	31.881	39.4981	37.6433	53.6962	55.3446	58.7417	59.2045	67.3112	74.0433	78.6407	86.9728	79.5824	97.3045	94.9728	116.705	134.996	134.072	157.925	172.51	197.406	223.934	251.598	282.854	302.624	345.074	311.535	300.481	333.003	298.107	312.953	279.509	264.938	265.581	225.637	195.739	160.471	140.609
2011-03-18 06:37:35		3.27183	0	0	0	1.19878	1.113	7.22676	14.9625	17.1113	24.6368	22.2049	36.1183	39.4801	47.5439	53.2446	52.1737	63.9827	68.4699	73.6215	68.3833	83.6503	93.8548	91.5612	95.6381	108.379	115.803	133.718	145.573	158.045	179.535	201.414	255.126	265.431	293.281	299.209	310.074	334.196	318.512	323.843	328.808	309.064	273.706	290.19	266.553	223.754	172.921	134.628	141.332
2011-03-18 06:52:35		0	0	0	2.29199	0.274499	5.56494	9.2924	9.60163	18.7713	31.0555	29.9393	37.7798	45.7215	51.2683	62.6186	55.3144	70.3083	80.2151	76.0407	76.8202	66.6663	84.5929	80.7721	80.9865	111.704	116.631	128.594	140.827	163.297	157.292	191.679	226.188	269.235	261.779	309.637	322.24	336.763	316.915	324.881	343.074	321.779	311.638	303.952	258.784	209.139	205.026	161.194	134.245
2011-03-18 07:07:35		0	0	0	0	1.19884	5.56471	5.34224	10.3942	15.1952	17.5162	35.9756	33.7343	39.109	41.5458	54.2676	57.4609	71.1135	51.7801	75.4058	69.8442	76.5234	81.9349	92.4859	95.5407	109.685	122.836	135.862	146.392	153.772	163.203	206.919	215.447	260.162	290.655	302.268	333.01	319.071	340.997	330.263	311.024	309.061	296.677	290.196	264.898	217.017	188.297	156.116	121.981
2011-03-18 07:22:35		1.63634	1.51258	0	1.29421	1.19896	6.67827	11.3574	15.3629	16.0237	20.0817	30.0198	39.784	37.8003	49.5603	60.4478	63.8619	64.433	70.8766	77.5202	76.883	76.8817	73.5811	88.292	104.147	109.865	110.379	129.549	140.024	141.823	163.552	199.537	232.388	240.571	281.723	307.494	311.803	342.926	330.439	344.856	318.119	323.926	324.035	274.138	260.29	217.863	206.22	187.057	133.692
2011-03-18 07:37:35		0	0	0	1.29415	0	2.22594	10.325	10.5618	18.771	20.0188	37.2696	31.9994	37.9506	41.4583	47.2199	45.6064	63.2548	65.501	65.108	82.4548	77.2878	89.0516	86.6413	99.1288	101.909	119.111	152.616	118.738	170.329	181.372	190.934	222.37	247.12	280.076	272.598	317.648	347.128	328.647	355.782	318.145	317.338	298.632	263.307	254.069	227.059	203.303	163.76	135.05
2011-03-18 07:52:35		0	0	0	1.29433	4.79542	9.72333	10.5982	19.2036	21.3636	27.7931	21.4071	43.5452	43.7606	44.5548	45.5696	49.9244	59.1446	60.6144	61.2545	69.2766	79.8439	87.0452	85.5782	90.5689	115.667	111.601	125.873	143.458	154.822	177.316	192.528	210.421	240.046	274.792	297.168	313.013	311.731	325.651	350.256	335.923	332.112	315.519	294.016	255.3	232.508	188.159	163.732	117.41
2011-03-18 08:07:35		0	0	1.3977	2.58844	1.19892	2.22596	10.325	11.5221	13.3361	11.7448	21.6916	30.2598	31.9295	30.8792	50.3234	43.5221	51.8205	64.6776	64.1429	59.5558	71.0949	76.2311	77.5032	99.5747	114.698	107.167	129.085	138.717	143.181	171.44	187.498	216.995	235.455	256.775	298.333	325.949	317.49	324.74	363.891	357.554	326.647	305.585	292.969	265.485	213.494	189.657	159.671	136.564
2011-03-18 08:22:35		0	0	0	1.29423	2.39787	2.22618	1.03257	13.027	14.5107	21.0212	19.011	28.967	35.3426	28.7801	32.2718	41.8413	46.6596	56.9228	60.0212	52.4205	55.4513	62.6946	77.9141	89.15	108.694	108.094	130.703	128.339	137.35	177.544	187.977	212.965	231.931	281.521	306.34	315.791	353.923	334.407	342.141	345.734	294.771	300.807	275.377	251.873	219.958	200.254	155.849	132.69
2011-03-18 08:37:35		0	0	1.39784	0	2.39798	4.45269	11.358	9.60186	10.6351	17.764	23.8075	18.7876	30.1865	29.4022	42.4391	47.5631	54.3	51.5401	51.5564	49.2244	46.6974	52.7683	69.8603	82.824	95.7042	103.479	133.029	137.723	171.14	151.909	184.621	219.794	237.077	275.224	295.703	314.613	341.779	346.846	348.343	317.412	330.212	324.49	280.234	246.789	214.045	193.9	157.684	120.839
2011-03-18 08:52:35		1.63624	0	0	1.29437	1.19898	3.33901	6.39378	15.1787	16.033	19.2384	21.745	35.9869	30.0881	31.3317	37.2128	37.0388	43.4756	44.7798	37.6308	53.4881	47.7106	60.1635	61.7119	75.5074	94.8372	122.594	123.409	138.45	145.781	160.303	175.503	231.975	237.165	258.175	313.357	313.137	331.016	333.474	343.215	359.933	331.968	327.849	297.418	249.906	223.8	197.88	150.206	133.203
2011-03-18 09:07:35		0	0	0	0	0	3.33923	11.3587	11.523	14.2262	13.7463	21.0543	25.3816	24.4665	37.9994	44.4228	34.5679	43.9955	44.8846	50.7205	45.7644	51.9401	48.2519	66.942	79.6635	85.9087	110.154	131.625	144.327	147.594	186.236	184.557	213.229	259.792	268.72	290.196	309.395	345.942	337.753	344.897	354.5	312.388	285.182	273.992	277.143	214.519	187.652	156.452	141.567
2011-03-18 09:22:35		0	0	1.398	0	3.59721	3.33981	5.16378	2.43868	8.45853	18.628	20.5751	25.9846	21.617	37.9506	42.8003	33.7894	36.625	32.8394	37.8506	53.9545	50.3865	51.8202	59.2587	70.0526	104.696	111.464	121.46	148.349	150.673	153.854	182.5	214.179	247.027	269.419	285.984	343.939	333.609	342.849	355.013	328.641	335.096	303.754	286.43	264.071	216.609	184.912	169.133	138.624
2011-03-18 09:37:35		0	0	0	1.29455	2.3985	2.22674	4.13157	5.76285	12.5182	15.9549	21.0939	26.0931	26.1607	32.9821	33.6814	36.6769	34.2776	37.2625	37.9913	38.1263	48.7994	45.6154	66.4202	67.3862	90.2256	108.313	142.933	125.829	153.994	167.632	179.004	205.87	231.344	266.883	300.276	309.808	339.292	352.272	341.683	348.952	338.824	300.437	273.237	267.298	223.343	212.48	157.296	132.101
2011-03-18 09:52:35		0	0	0	1.29469	1.19934	3.34013	9.52779	15.6273	16.402	14.3207	20.1392	26.6092	30.3659	32.1788	34.3519	35.3157	36.0747	43.0766	42.2077	38.8372	49.4029	55.9199	53.3939	80.9244	85.1484	105.032	103.862	135.511	138.317	164.303	192.292	187.454	249.169	287.229	308.81	327.006	314.154	342.506	341.708	354.577	339.154	311.41	274.455	276.192	240.371	181.31	165.557	134.351
2011-03-18 10:07:35		1.63678	0	0	0	0	2.2267	4.13151	11.0612	5.79785	18.5628	15.2456	11.6134	19.454	36.1157	23.7614	38.2429	35.551	46.85	41.4987	38.1744	48.1035	55.9474	61.8186	69.5612	83.3192	110.643	141.432	137.398	128.017	175.164	175.561	191.182	230.835	277.953	301.442	309.864	339.663	363.301	347.487	353.702	335.295	319.095	274.323	237.452	230.246	190.335	144.197	123.878
2011-03-18 10:22:35		0	0	1.39844	0	1.19928	2.22716	6.19792	5.76381	13.4144	11.6832	21.1847	26.6045	26.6162	32.2766	34.3712	32.5657	44.6032	52.8372	47.6061	43.3817	52.8843	54.634	56.4638	79.1109	82.4494	102.697	107.554	132.57	148.562	154.609	189.431	212.883	228.317	258.455	293.123	328.837	315.651	329.449	324.564	336.715	341.718	306.787	293.77	290.487	240.992	192.125	152.378	125.599
2011-03-18 10:37:35		1.63744	0	0	0	2.3992	3.3409	3.09936	7.14843	9.44429	10.8503	22.9501	27.9201	25.0721	25.8948	29.3808	39.1747	36.6734	45.1087	41.4753	41.8981	46.3859	58.4096	65.2554	81.392	92.3478	112.007	114.191	125.799	134.209	157.74	192.131	224.135	243.594	262.009	331.103	311.833	337.583	338.167	354.708	342.061	334.196	300.475	272.047	265.926	234.433	189.465	152.155	138.498
2011-03-18 10:52:35		0	0	0	0	0	3.34128	6.19926	8.47131	8.21452	11.6859	17.5472	23.3632	22.4495	29.9467	30.7023	34.4237	49.1256	46.2715	47.4298	45.7522	50.6324	56.7747	62.7119	73.8058	79.734	109.112	121.336	116.202	133.928	141.03	169.794	221.508	222.019	264.451	299.609	311.757	321.907	367.808	362.942	350.631	339.859	318.784	301.819	262.081	221.352	186.504	160.371	139.67
2011-03-18 11:07:35		3.2749	1.51374	0	1.29515	1.19964	1.11396	2.11803	7.63878	9.84022	17.53	18.9529	27.8462	34.5468	33.9346	32.9817	32.3119	44.6045	48.8551	44.3869	46.4096	50.3958	57.0721	64.4122	68.5705	80.9353	89.1859	119.285	116.638	143.229	155.745	169.499	193.814	235.801	249.515	274.742	319.94	349.218	372.404	354.712	346.022	335.465	332.019	291.887	256.607	220.543	181.348	142.252	116.925
2011-03-18 11:22:35		0	0	0	2.59064	2.39976	7.79728	8.26689	7.11628	5.89965	10.0175	18.2664	29.221	23.4561	28.4315	43.1663	40.0375	35.8926	38.5173	40.074	47.1801	47.1157	54.3888	60.4548	68.1647	84.0147	81.9064	111.801	113.71	132.957	152.223	178.982	197.53	229.085	286.683	299.575	324.455	323.897	361.295	348.426	354.41	319.627	293.912	294.185	245.931	224.667	188.203	156.122	129.411
2011-03-18 11:37:35		0	0	0	1.29535	1.19974	2.22756	7.23295	6.72641	8.70702	12.7443	16.1054	14.71	26.424	28.5705	38.4734	30.3564	41.8439	37.5141	52.9519	57.7327	53.108	48.6061	63.7093	68.1984	73.7571	91.4266	116.95	115.63	133.85	160.939	165.14	212.162	253.822	272.484	281.881	312.011	344.939	335.744	346.994	351.958	342.256	319.171	283.888	251.346	217.133	185.288	148.744	130.615
2011-03-18 11:52:35		0	1.51334	0	0	1.4262	0.903426	1.03309	8.64692	3.57776	6.72497	17.704	19.0154	14.5336	23.5407	29.6036	36.0497	32.5468	51.1436	46.9099	44.2696	42.9256	58.3196	63.117	70.7096	83.3817	82.5144	112.62	121.258	117.544	146.527	169.519	190.865	227.678	248.245	285.721	333.279	299.948	351.141	373.625	346.587	322.26	290.942	302.464	267.027	226.587	196.182	154.994	112.995
2011-03-18 12:07:35		0	1.51334	1.39836	0	1.19958	1.11368	4.13228	4.26054	5.87157	10.0149	11.4224	21.2764	29.4397	26.4438	24.5713	36.9978	32.4619	39.5356	38.5731	51.2673	39.2907	52.0843	65.7292	70.5772	78.8622	81.0096	115.697	132.362	116.529	155.262	180.178	198.333	248.267	288.836	284.954	311.991	343.865	355.138	364.994	353.436	325.372	309.904	284.964	237.318	219.794	213.756	164.858	118.642
2011-03-18 12:22:35		0	0	0	0	0	1.11366	1.03301	3.84285	10.7325	12.6153	15.2979	10.5746	25.9093	36.3721	30.5745	40.2859	32.0435	34.7103	38.9234	55.2144	40.8365	50.7753	62.0176	66.2551	86.5125	89.9131	102.755	127.706	118.904	144.826	177.642	207.959	224.533	254.429	313.337	344.285	328.968	334.295	361.962	340.343	334.183	299.275	279.213	252.69	228.954	193.528	165.765	135.02
2011-03-18 12:37:35		1.63706	0	0	1.29493	1.1995	1.1137	1.09159	7.63128	9.64801	14.3649	12.8454	18.4535	27.5729	33.0837	35.6263	36.3369	35.1029	50.0526	41.541	49.7994	47.0026	51.884	66.6635	84.4538	85.599	95.4163	110.905	105.46	127.857	153.047	184.726	207.364	253.812	254.729	294.678	318.241	334.894	323.817	352.295	359.093	336.888	318.754	297.654	278.355	222.923	184.377	164.225	126.516
2011-03-18 12:52:35		0	1.51326	0	0	1.19948	1.11362	3.17422	3.77304	7.15532	6.67692	17.5669	19.5337	22.8977	20.5596	38.5074	32.4772	34.9006	41.7103	43.951	47.5266	49.0747	62.0747	56.6167	61.1506	74.8433	92.1689	96.8785	123.754	138.033	158.696	170.803	214.521	237.967	274.011	293.113	306.989	324.968	325.199	351.702	342.622	346.779	322.481	291.991	285.915	237.871	183.287	158.261	135.741
2011-03-18 13:07:35		1.63712	0	0	0	0	1.1136	1.03307	3.84308	6.26077	14.2704	14.429	17.635	22.9593	23.0439	25.7442	27.3879	41.4426	32.0335	37.5205	41.9859	42.8026	49.5663	57.184	70.7356	70.0917	85.2583	97.1849	112.496	136.53	150.47	173.55	207.055	239.76	260.222	287.636	314.287	346.494	330.859	340.478	331.327	317.618	314.117	302.093	287.015	220.639	210.455	169.117	136.879
2011-03-18 13:22:35		0	0	1.39852	0	0	1.81604	4.51484	5.22074	7.44115	4.38054	8.28574	15.8458	25.6002	27.4808	26.3063	25.9523	36.7455	44.8529	37.3228	53.1317	42.9452	55.9564	53.6506	67.0551	72.3192	98.8519	102.735	121.866	120.435	150.387	176.941	199.673	224.729	266.268	295.537	303.462	332.663	363.833	349.949	337.603	329.09	327.564	293.618	253.96	240.561	180.936	160.867	124.563
2011-03-18 13:37:35		0	0	1.3985	1.29527	2.3996	0	5.16599	8.64804	8.94516	11.6863	15.1756	18.4371	20.0225	27.3389	28.9826	37.3071	36.4484	29.5894	38.3356	48.4522	53.7353	46.8933	68.5862	70.4369	77.7048	95.4087	114.087	103.524	113.008	135.793	171.356	181.094	255.252	270.941	303.183	349.994	343.769	360.833	343.083	348.683	311.649	321.683	295.134	257.658	228.402	189.056	149.746	134.239
2011-03-18 13:52:35		3.27471	0	0	1.29541	1.19976	2.22756	1.03343	4.80433	6.01926	11.9126	13.0044	15.8436	16.1342	21.1889	31.7905	29.5581	34.8106	41.4862	40.2054	35.0814	49.583	47.1532	68.0282	64.267	74.6663	97.2728	115.781	123.806	121.787	152.776	158.848	183.98	224.109	262.935	305.094	336.615	350.471	349.734	362.92	363.394	345.385	327.865	302.452	265.992	232.16	177.212	145.827	129.293
2011-03-18 16:22:35		0	0	0	0	0	4.08689	1.47826	7.58798	5.36567	10.8492	14.0117	22.2499	25.9024	37.6029	31.274	26.0431	31.5032	35.4436	42.0051	39.0942	47.1782	47.6949	51.0503	60.6891	70.6397	85.6497	103.812	118.478	100.568	121.621	156.795	187.027	221.398	251.554	293.68	324.244	332.407	341.619	337.734	337.913	328.333	320.074	282.566	262.572	210.671	185.963	145.96	118.694
2011-03-18 16:37:35		1.63672	1.51316	0	0	1.19934	0	5.26651	2.78666	8.04804	12.5171	13.6795	15.4666	22.3276	25.5214	23.6703	31.341	39.6606	39.601	34.9699	43.0173	43.717	41.7247	51.4186	64.9103	81.3433	96.1481	97.9125	101.709	109.749	139.027	141.585	196.953	227.883	259.816	301.659	313.363	359.083	345.888	350.346	348.526	339.641	306.286	275.353	253.854	232.688	183.708	136.396	135.727
2011-03-18 16:52:35		1.63676	0	0	0	0	3.34019	9.39971	5.66631	12.3586	10.9964	13.6093	19.9604	15.8489	29.5583	33.3567	37.4779	31.5835	32.3019	36.7423	50.276	51.4516	55.1449	54.0179	71.9321	65.559	84.0519	94.458	109.909	120.002	150.725	157.62	196.869	228.169	273.513	286.418	311.13	358.08	340.381	343.218	344.817	362.253	312.875	284.365	262.27	223.428	196	156.965	130.665
2011-03-18 17:07:35		1.63672	0	0	0	0	1.11316	4.1309	4.33474	6.69362	10.2819	17.2123	13.3212	18.1596	31.0835	25.3712	41.1381	36.2205	33.3712	50.9442	36.4237	52.1971	54.076	65.7801	74.8019	75.1228	92.9372	108.28	117.141	133.714	142.684	164.053	185.557	222.931	260.801	288.426	321.183	350.936	352.256	379.196	354.308	338.856	314.896	276.582	270.471	219.195	201.252	145.595	132.017
2011-03-18 17:22:35		0	0	0	0	2.39828	3.3401	1.03267	5.28968	4.91042	5.00571	15.0586	20.8798	22.2476	17.8313	32.2926	32.6833	37.4705	38.2381	41.6625	45.3096	56.725	54.3247	57.7641	70.1346	78.7369	97.9314	105.199	103.541	132.869	160.204	164.567	211.162	241.927	266.829	272.306	305.581	330.606	350.173	326.167	336.205	348.788	312.436	286.314	262.482	223.267	209.159	155.066	125.056
2011-03-18 17:37:35		0	1.51268	0	0	0	2.22644	6.19561	7.68247	3.57606	8.34234	12.8365	16.7798	19.8831	19.3717	32.6631	36.6093	28.2897	43.5019	45.9721	45.8978	50.2487	57.501	59.7266	72.617	79.9433	105.206	109.331	122.113	128.151	147.428	171.743	201.132	240.373	247.302	314.277	317.53	355.199	340.667	338.125	360.651	337.824	316.963	285.549	266.851	224.976	190.565	175.799	141.27
2011-03-18 17:52:35		0	0	0	0	0	4.15484	3.37369	4.80131	8.04554	15.8495	10.8194	12.7327	19.9061	22.8469	29.2845	31.6789	40.3019	40.001	44.2295	54.6196	45.7119	57.834	64.4455	79.1785	74.7173	97.85	114.729	113.734	123.85	152.795	178.179	212.109	227.404	236.614	296.707	317.829	343.362	345.131	366.631	353.109	349.827	338.41	254.718	272.081	240.184	199.702	158.099	123.423
2011-03-18 18:07:35		0	0	1.39778	0	1.199	1.11308	4.13016	7.68192	6.25763	5.83955	12.5078	22.1667	23.3852	26.1082	26.909	29.472	39.725	44.5625	35.2218	51.4571	54.9324	57.1994	63.0032	68.7247	89.4394	99.5766	120.708	121.278	136.906	142.88	164.341	203.722	211.208	254.475	282.628	318.622	342.593	339.372	376.292	356.465	350.244	309.475	293.524	271.859	226.733	183.562	155.543	136.923
2011-03-18 18:22:35		0	0	0	0	0	0	4.13038	5.32237	7.48163	7.90987	15.9513	16.6234	23.7937	27.773	32.0994	39.0253	38.4314	38.6151	43.183	48.6894	48.7615	57.0766	67.1651	77.2968	87.6212	96.4503	110.17	122.045	151.727	143.858	175.811	191.112	224.978	236.1	283.097	312.186	336.974	342.244	345.308	347.814	355.657	315.409	293.331	261.316	228.397	197.234	166.006	117.681
2011-03-18 18:37:35		0	0	0	0	0	1.11312	5.16256	3.84067	7.15099	11.875	9.97365	14.3839	17.4859	17.5272	32.6106	37.3574	39.1478	47.7561	46.9615	47.541	54.9292	54.1984	60.0821	72.6984	84.7465	91.8974	98.7686	120.971	134.435	140.573	167.392	192.756	221.665	263.033	286.765	307.542	327.179	340.981	356.372	337.622	317.338	313.608	281.178	260.18	214.77	201.456	160.002	125.553
2011-03-18 18:52:35		0	0	0	1.29433	0	1.11304	3.0977	4.80093	5.36349	11.1707	14.1219	20.1402	18.1435	15.1038	33.5872	33.684	33.976	36.3231	45.6301	48.7429	44.8394	51.9978	53.8862	72.817	78.1686	93.3971	109.266	106.225	129.696	152.183	160.621	173.452	228.896	256.783	286.152	289.051	329.67	343.135	350.372	364.955	340.26	324.029	282.011	251.314	230.883	196.807	153.754	119.403
2011-03-18 19:07:35		0	0	0	0	1.19898	0	3.0976	5.76093	6.25708	10.1854	15.4301	16.317	21.0546	24.4037	28.4241	30.8391	39.642	42.5558	39.026	48.8038	51.6468	54.7	63.1994	63.6452	79.4644	93.9308	103.299	117.456	135.768	156.613	156.084	187.015	232.278	246.59	281.416	298.265	315.994	344.721	337.147	348.859	326.833	327.375	285.519	258.804	233.101	174.269	151.124	114.843
2011-03-18 19:22:35		0	1.51246	0	0	0	3.33897	1.03247	3.8408	5.36353	8.34128	19.883	16.4748	17.4688	24.4623	29.3876	33.5298	34.4054	37.384	51.5628	51.6455	52.5462	55.9269	71.5856	72.9731	83.2609	94.4939	121.57	125.214	124.287	159.054	164.92	207.133	204.185	239.866	279.481	308.183	324.442	339.814	348.638	323.66	328.856	289.283	296.949	250.248	219.852	171.274	142.702	128.952
2011-03-18 19:37:35		0.096176	5.96119	0	0	0	3.04317	1.30733	3.84083	6.2574	8.51253	11.99	15.571	17.4452	30.5018	23.5647	28.2871	45.8753	46.2881	39.426	45.8494	53.0942	58.2112	75.3869	74.7667	81.6542	84.4093	117.877	118.314	133.634	151.412	154.064	201.244	204.343	236.877	283.253	272.033	308.199	339.298	344.756	343.859	318.041	315.881	264.97	265.072	211.462	184.197	137.554	136.328
2011-03-18 19:52:35		0	1.51236	0	0	0	1.11294	3.09716	6.72119	3.57526	10.0092	9.59324	16.7725	20.3592	20.7787	35.8904	41.926	36.4106	46.7462	50.0968	56.9747	54.1933	64.4083	57.8824	76.2744	90.5378	86.9769	109.009	125.689	122.5	143.62	164.922	211.426	214.329	254.189	256.396	279.069	309.495	298.532	317.66	335.228	319.675	312.037	293.233	250.026	232.915	175.351	155.338	126.763
2011-03-18 20:07:35		0	0	1.39754	0	0	0	4.12971	1.50705	7.53538	5.83869	9.7208	16.5561	20.883	27.2985	34.2804	31.2444	35.2522	36.8599	43.983	49.8474	47.8131	59.733	58.0061	79.691	78.2109	78.3462	93.7545	118.354	131.348	135.757	155.194	194.359	215.387	224.609	276.625	299.579	291.172	334	338.192	367.365	334.151	274.641	281.408	253.271	214.864	175.809	156.579	128.338
2011-03-18 20:22:35		0	0	0	0	1.19878	0	0	1.92019	6.25692	5.00446	7.43564	7.40349	19.0235	22.5551	27.9663	31.6408	41.7311	45.2635	42.7388	40.3446	56.0923	72.9522	69.1484	62.3112	79.7266	91.974	108.786	103.437	126.808	120.406	180.553	200.33	211.006	229.114	258.333	300.078	309.932	320.038	325.619	341.808	309.573	316.036	282.099	252.83	216.416	186.23	151.412	130.2
2011-03-18 20:37:35		0	0	0	2.58816	1.19866	0	4.12946	0.960157	4.46901	5.83817	9.37349	11.2003	18.4802	23.3169	32.9304	34.7125	41.1349	41.0926	47.3744	53.5744	56.9955	55.2071	67.1619	71.2529	74.2808	86.1228	91.9481	123.968	128.215	154.267	164.199	212.925	225.875	240.537	287.346	302.013	292.588	334.317	326.949	358.724	324.747	309.87	293.61	251.456	241.154	193.428	148.558	131.961
2011-03-18 20:52:35		0	0	0	0	1.19864	0	3.09702	2.88011	2.68141	11.8696	9.28167	17.631	16.6952	20.0915	32.5484	33.0737	35.1929	45.1356	38.6439	49.4817	39.6192	59.0904	57.7221	64.7263	88.4362	106.534	99.1308	101.652	134.744	144.874	161.705	204.67	224.946	261.342	293.838	309.463	335.404	340.901	352.279	332.369	313.357	312.835	271.743	274.581	222.682	193.301	158.071	134.493
2011-03-18 21:07:35		1.63596	0	0	1.29395	1.19866	1.11294	0.219571	4.59606	5.36244	5.83821	10.9379	9.40346	15.6016	20.4385	24.6966	31.2472	41.7904	39.9885	51.1215	54.3904	53.6311	62.0625	71.8048	72.6151	88.7391	98.8077	99.4891	113.062	139.746	144.153	155.896	178.145	226.214	237.753	271.392	298.345	334.362	327.792	353.647	350.962	320.676	314.81	273.033	263.447	221.504	185.777	163.043	120.929
2011-03-18 21:22:35		0	0	0	0	0	1.1127	3.09696	9.22766	9.28327	7.50564	6.70638	8.31744	22.3431	28.4301	23.9704	27.1182	32.491	46.9244	45.9474	52.3288	56.5558	68.8583	73.0929	70.0792	89.5221	99.8359	114.482	117.314	126.953	137.298	165.679	187.812	233.357	244.054	284.419	315.096	326.712	354.913	350.391	345.526	339.01	328.795	304.405	268.387	207.821	179.996	155.076	116.15
2011-03-18 21:37:35		0	1.51212	2.79465	1.02484	1.44786	3.33827	4.12894	6.72029	8.04372	8.33978	9.46138	17.5198	21.5229	23.1343	41.7548	35.0442	42.8074	41.8978	49.442	46.1128	57.2558	62.0856	67.3888	84.2955	96.3635	91.9288	107.504	123.393	125.662	128.586	168.916	190.262	208.508	240.124	277.716	328.949	305.545	352.968	360.362	348.314	334.782	318.121	325.333	264.213	227.634	192.4	154.679	135.15
2011-03-18 21:52:35		0	0	1.39744	1.29407	0	3.33837	1.03223	2.88009	3.57494	9.17375	11.2791	14.0068	18.2915	26.3562	26.3426	36.1865	38.9692	47.6587	51.6119	52.1744	57.3115	65.826	68.3917	68.4638	85.6494	93.2112	115.479	119.219	142.119	137.819	167.378	207.34	213.742	246.893	282.652	304.077	331.228	342.641	344.032	330.676	317.524	338.731	288.864	266.837	215.325	198.471	163.063	127.374
2011-03-19 00:22:35		0	0	0	1.29353	2.39633	6.67404	5.15955	12.4748	8.04051	9.17006	26.028	17.5543	23.2718	34.7699	31.7588	40.049	38.6186	40.5978	51.9609	57.6125	61.0365	61.5077	71.2939	76.5535	97.4298	114.796	117.985	126.951	140.237	177.696	171.414	185.833	225.879	234.696	241.715	286.617	281.661	324.381	309.495	335.035	304.782	316.096	314.485	286.519	253.476	226.12	201.048	150.603
2011-03-19 00:37:35		0	0	0.420013	0.904247	4.79285	3.33689	5.15923	4.57061	13.8093	18.0786	20.39	22.2532	23.2678	28.5218	32.2651	37.242	41.367	37.6897	47.6801	56.534	47.2474	59.7247	79.3676	92.4647	101.951	112.093	126.033	140.102	139.874	135.629	175.429	195.21	221.206	238.005	275.397	277.772	298.674	309.479	319.191	326.535	327.167	318.646	315.597	271.166	262.708	243.225	183.964	148.738
2011-03-19 00:52:35		1.63508	0	0	1.29333	3.59394	1.11224	2.06348	4.79734	8.93224	9.89019	17.1763	17.391	31.477	25.1222	35.1663	32.808	36.4769	39.8628	47.9321	50.3955	57.4856	62.3196	82.0929	84.1109	94.5417	95.4093	124.694	117.035	155.907	165.641	162.254	172.296	207.708	251.32	257.676	279.686	310.052	308.68	317.035	321.25	335.224	316.013	310.97	305.629	259.712	230.833	182.811	149.67
2011-03-19 01:07:35		0	1.51146	0	1.29337	1.19808	7.78583	2.06374	12.4739	13.3994	8.71285	12.2696	11.8204	26.8299	25.2752	41.659	41.5837	42.4468	42.8135	46.8538	48.0551	50.4417	64.9218	74.9901	85.7462	88.1311	107.295	120.722	130.184	146.164	177.837	151.662	172.682	227.17	240.545	246.456	256.569	309.179	330.67	355.147	339.782	338.266	328.833	331.728	291.479	273.626	234.203	182.861	144.559
2011-03-19 01:22:35		0	0	0	1.29341	1.19804	4.44888	7.22224	5.75702	7.26984	6.06622	17.3331	11.7885	24.0314	24.2344	35.6365	29.3982	37.7378	36.2946	35.6574	46.6574	62.5196	71.4673	75.5923	88.3292	85.9901	98.2471	128.176	126.398	120.854	168.412	189.984	214.752	208.532	247.272	263.862	266.094	313.441	316.495	351.615	333.869	342.362	322.449	299.433	294.663	247.69	224.97	190.232	159.9
2011-03-19 01:37:35		0	0	0	0	1.19804	2.2243	3.09475	11.5126	8.03827	5.83429	5.07231	9.95814	19.1827	26.6418	28.2907	30.2618	31.9355	36.2045	47.6173	50.0667	63.3984	57.0397	81.5561	87.5247	79.7042	92.6651	119.629	131.45	148.95	169.413	177.163	189.011	231.983	232.268	281.542	278.185	301.789	335.202	320.885	361.683	332.484	338.497	299.91	316.975	279.339	218.323	180.727	176.238
2011-03-19 01:52:35		0	0	0	0	1.19798	10.0092	6.19032	4.79708	8.03856	13.3358	9.85827	15.5819	12.3286	19.8656	26.2562	23.4563	30.6474	36.2878	39.7942	49.759	61.8548	63.4006	68.8542	71.7196	104.529	115.173	110.023	124.823	152.52	165.905	168.08	182.276	221.382	249.818	249.644	268.952	321.147	340.141	349.087	365.705	350.417	324.417	308.479	288.58	262.838	234.153	182.003	166.969
2011-03-19 02:07:35		1.63488	0	0	0	0	3.33651	5.15885	15.3504	8.03843	10.0015	9.79772	14.1211	24.6306	15.1108	29.467	28.8415	30.1005	38.5266	42.0247	51.0962	57.1907	62.1465	76.6103	91.4218	97.5128	106.386	128.478	133.614	130.469	149.575	176.394	199.856	224.157	255.346	271.176	293.842	319.479	324.59	340.189	347.679	321.888	325.131	310.771	277.081	242.171	228.201	185.793	151.845
2011-03-19 02:22:35		1.63465	1.5111	1.39639	1.29305	0.488442	5.10679	3.09479	12.4714	12.5032	6.66712	13.439	20.8278	14.4992	26.7943	33.0077	33.2625	33.3279	37.6885	44.8128	41.6798	50.7952	62.2708	67.8763	89.724	95.0856	104.402	121.328	120.938	144.686	149.772	167.51	195.759	209.631	248.183	266.124	290.915	306.21	340.92	326.949	325.327	307.49	321.144	326.596	277.905	254.99	236.442	202.35	170.18
2011-03-19 02:37:35		0	0	1.39639	0	2.39559	6.6724	7.22141	5.53811	11.8128	10.0012	11.1481	16.9264	18.7909	17.9907	21.8133	34.8939	38.4676	36.7333	52.2606	45.7234	45.3013	56.958	66.916	72.9144	94.6346	105.646	115.171	138.756	130.857	169.575	181.118	195.952	213.982	257.975	254.629	294.497	290.97	343.612	345.429	347.016	320.821	340.772	340.272	282.48	266.492	224.201	196.19	150.11
2011-03-19 02:52:35		0	0	1.39654	0	2.39551	6.67215	2.06316	5.75593	9.04894	14.0563	10.3956	16.4399	19.8221	18.4249	23.0533	25.3446	35.6946	38.5026	33.7212	46.1096	57.984	60.1587	76.0596	85.1679	86.2285	109.671	105.729	124.571	137.843	143.9	171.404	203.165	206.889	226.803	272.402	267.488	304.747	304.998	340.141	338.282	327.744	346.391	297.326	296.274	273.103	234.026	166.442	161.721
2011-03-19 03:07:35		3.26929	0	0	1.29305	2.39547	3.33571	7.21997	12.4702	14.4287	13.6025	17.1287	22.8522	19.2502	24.2139	33.4705	35.6115	31.3726	37.7856	41.042	50.1535	50.5676	57.2439	64.4234	85.2619	87.8474	98.4657	106.497	123.013	131.164	145.605	173.033	196.663	210.615	225.399	250.701	273.127	285.008	342.446	340.413	346.375	332.936	324.154	313.99	297.067	277.059	221.288	177.991	152.137
2011-03-19 03:22:35		0	0	0	0	1.70929	6.19686	10.3151	11.511	11.609	18.3331	18.144	14.1673	13.6686	22.1378	24.3436	37.4849	39.3538	45.6763	40.9282	48.2112	49.3272	63.0548	58.6792	69.1875	98.0885	108.348	113.409	119.218	140.16	165.074	178.165	193.139	230.002	246.741	256.857	268.015	303.471	310.909	299.892	335.397	317.65	319.201	313.47	279.291	276.905	245.072	186.735	159.115
2011-03-19 03:37:35		0	1.51088	0	1.29301	2.39523	4.44756	14.4407	12.1016	14.6308	12.4996	17.5865	15.4478	22.6297	22.378	27.1268	28.256	39.0603	40.6141	37.1051	47.8619	60.6096	65.3673	63.7776	79.1776	88.1888	104.382	119.458	128.434	143.075	141.609	176.128	170.867	191.226	237.863	254.91	268.447	297.867	336.394	331.635	348.545	336.266	344.163	296.304	288.269	252.981	215.379	162.165	151.803
2011-03-19 03:52:35		0	1.51108	1.39641	1.29305	0.983795	10.2066	11.3469	21.666	36.3686	37.6513	38.7192	42.0061	40.0558	51.0189	58.042	53.559	65.8112	60.6247	62.7901	59.3054	62.3298	67.7119	72.6686	85.0744	94.0042	102.054	115.354	117.022	126.735	139.08	174.696	198.063	187.276	233.772	240.296	278.628	307.594	314.679	347.801	329.029	339.587	324.987	291.462	283.466	239.744	225.729	173.506	144.413
2011-03-19 07:22:35		1.63407	0	0	1.29251	1.19728	4.35577	13.9546	18.4701	20.1177	34.9859	27.1084	37.5737	34.6144	37.1596	39.9744	44.5151	51.8728	55.1353	62.9683	59.5865	68.7856	62.0064	73.7266	76.6458	90.2417	100.241	131.865	132.136	122.091	142.846	159.321	171.346	191.739	220.216	246.795	270.306	280.871	316.196	307.732	307.424	322.865	309.872	301.646	298.41	243.389	201.809	169.104	138.476
2011-03-19 07:37:35		1.63417	0	0	0	5.9867	6.63891	8.72471	26.4357	27.0084	38.226	48.1529	41.1583	41.3782	53.124	54.6099	58.0955	53.5923	58.4404	61.4446	57.1337	62.4269	54.5067	65.0228	63.6846	75.7785	93.3429	116.699	117.447	148.69	128.736	158.884	185.747	184.984	198.077	261.975	279.696	309.802	322.782	319.475	347.824	326.894	309.173	297.955	239.499	237.131	205.745	161.154	133.598
2011-03-19 07:52:35		0	0	0	0	0	0	1.03143	3.83635	8.03574	6.66574	6.69891	10.524	16.3751	15.7203	25.0894	32.3917	44.7849	46.4135	40.2994	62.4426	63.3769	64.2737	73.9554	75.3612	100.207	103.57	103.116	121.255	119.642	124.943	149.019	176.132	182.959	227.796	253.379	261.29	300.681	286.494	354.872	325.135	336.404	314.401	280.663	268.972	232.334	186.108	173.145	125.33
2011-03-19 08:07:35		0	0	2.79223	0	1.19754	1.1117	2.06252	0.959093	8.92862	4.16606	7.46833	8.21484	19.8247	28.6386	24.5653	28.0325	40.8279	40.5029	53.7381	60.8199	58.925	71.1696	69.3067	74.5103	97.0577	87.8663	103.925	119.563	122.499	143.842	170.984	184.862	190.863	212.141	255.753	263.085	290.929	319.557	317.947	323.407	307.738	311.126	286.855	252.748	239.479	197.61	155.096	129.215
2011-03-19 08:22:35		0	0	0	1.29295	1.19747	2.22356	3.09393	1.91841	5.35715	3.33256	10.4043	12.6488	17.7107	24.4689	27.908	35.7522	44.1154	39.8413	56.5192	56.5734	63.7234	63.1946	77.2167	68.2279	79.7067	95.0462	102.317	129.678	132.833	136.044	157.845	169.856	195.597	218.738	243.375	250.831	277.74	308.728	313.954	314.335	314.337	332.337	297.634	267.444	232.334	200.064	155.24	133.033
2011-03-19 08:37:35		0	0	0	0	1.19764	0	0	3.83663	4.62792	4.84708	12.6644	9.8208	8.37987	24.1777	21.0018	37.3734	34.7833	42.924	49.8038	59.7721	67.1824	58.9474	67.7728	75.4071	92.6679	92.1067	115.263	125.266	131.22	118.256	151.076	173.434	188.836	207.146	276.691	283.367	295.747	303.606	317.408	336.099	332.01	308.153	279.247	253.646	230.198	209.992	154.726	118.71
2011-03-19 08:52:35		0	0	0	0	0	2.22368	3.09417	1.91845	2.67885	4.16651	5.86702	11.0242	19.1535	25.7617	25.8085	35.6481	42.6974	42.4949	50.7785	58.8577	53.1894	60.6683	79.2987	77.7705	80.2381	99.7449	114.275	108.619	120.462	144.982	161.058	170.954	199.994	193.061	244.147	237.155	274.391	335.388	328.481	325.285	320.008	318.455	295.803	254.443	225.266	208.506	175.653	127.262
2011-03-19 09:07:35		0	0	1.39625	0	1.19766	0	1.03155	1.91821	5.35779	6.27532	11.6367	11.0681	19.6667	18.1468	31.7035	36.0163	48.1965	50.7071	47.3615	57.7728	54.3429	67.8612	66.467	64.0804	79.299	108.831	105.166	113.855	134.022	138.932	147.324	178.7	190.421	227.666	223.309	268.107	299.062	292.61	340.75	319.191	317.446	317.26	291.454	269.091	227.019	195.166	168.658	132.105
2011-03-19 09:22:35		0	0	0	1.29289	1.1977	2.22372	1.03149	3.83667	2.67885	9.16615	7.36308	9.12375	17.2596	22.2372	23.5595	37.4353	27.9746	42.826	51.9372	55.0631	55.9212	64.5311	67.184	74.6856	84.8112	102.235	106.289	106.722	131.198	148.748	163.682	172.67	188.261	231.414	218.556	250.565	286.44	311.909	308.397	312.149	323.029	299.581	277.524	260.811	230.477	200.515	159.219	135.565
2011-03-19 09:37:35		0	0	0	0	1.19778	0	2.06294	0.959276	4.46481	4.575	9.32295	8.22519	20.4743	26.6999	33.267	36.909	34.7471	40.1577	51.9878	54.0625	60.9696	54.8022	75.9622	66.8545	79.216	101.307	119.266	114.996	123.572	140.441	155.28	152.518	197.756	221.749	257.146	278.608	313.552	330.138	327.769	309.103	329.429	278.584	285.555	259.754	244.649	203.045	172.793	133.019
2011-03-19 09:52:35		1.63437	1.51092	0	1.29285	1.19756	1.11188	1.03145	0.959135	2.83944	5.68304	6.01192	13.2181	16.2492	18.6616	31.9287	30.7564	43.0596	45.4385	50.5651	60.526	58.9875	68.7221	71.1628	72.8064	97.3619	97.8179	105.606	103.077	124.325	137.682	170.511	167.278	201.021	219.609	237.851	258.093	274.934	300.984	321.221	320.443	308.512	308.988	288.333	257.196	243.614	209.549	174.625	143.702
2011-03-19 10:07:35		1.63465	0	0	1.29281	0	0	0	3.67413	3.72337	4.99929	11.8766	9.25779	11.1883	15.6076	27.5256	35.2029	33.017	60.3032	50.8644	50.7837	56.4673	73.226	61.1494	80.0183	85.725	95.8772	103.576	119.135	131.212	134.054	151.02	168.532	196.136	203.554	248.58	292.334	288.229	305.926	333.24	324.221	312.079	282.157	292.985	275.435	236.058	199.659	168.68	141.228
2011-03-19 10:22:35		1.63468	0	0	0	1.19778	0	3.09461	1.91851	6.25099	10	5.16615	13.1237	11.5247	20.9834	26.2756	30.141	48.8728	46.7551	41.9029	61.0103	46.6045	67.3532	70.7561	73.7929	93.8599	107.365	104.854	109.501	120.665	145.325	155.152	150.433	182.207	227.656	249.167	276.224	280.525	298.353	298.864	316.971	308.369	309.275	290.867	277.302	247.438	205.38	177.827	119.72
2011-03-19 10:37:35		0	0	0	1.29323	1.19774	1.11214	5.15808	3.83705	4.46571	6.66692	8.87439	8.92808	20.2564	22.4657	24.6689	28.096	46.809	51.2564	52.4484	56.9333	61.3452	66.2429	66.9542	75.5612	87.3138	90.4699	105.512	113.802	122.875	159.527	167.256	177.558	193.279	215.427	225.393	241.124	290.264	310.573	336.484	320.491	328.779	318.906	278.405	274.732	213.039	191.817	161.272	124.498
2011-03-19 10:52:35		0	1.51114	0	0	1.1977	1.11208	3.09475	2.87793	3.57218	1.66687	6.62308	12.4743	21.725	15.6563	23.7955	34.0833	43.376	46.4449	48.251	57.2311	58.4827	54.7125	71.3189	92.8154	80.4298	96.5731	120.054	116.074	111.328	142.27	152.722	172.348	184.125	230.689	229.475	260.082	286.875	315.793	295.988	311.767	320.683	304.037	288.658	268.656	223.992	210.162	166.771	124.988
2011-03-19 11:07:35		1.63476	0	0	0	1.19776	0	2.06316	0.959253	3.57221	5.00051	9.01484	16.8784	13.4375	26.2929	24.899	36.7266	41.2535	52.7718	51.3692	44.4756	48.8833	53.6381	69.5571	84.9228	84.3978	97.5676	103.546	111.471	115.782	138.61	147.228	158.246	183.982	244.884	242.402	267.12	282.232	324.189	312.754	321.032	321.202	299.221	281.765	245.707	235.004	182.975	166.124	125.557
2011-03-19 11:22:35		0	0	0	1.13486	0.146518	2.224	2.06314	0.959314	6.25138	5.00042	7.30478	8.8884	14.9593	22.1862	31.3115	42.6574	39.1327	50.3417	40.7205	55.9244	69.1439	63.0032	78.666	67.4045	86.6138	101.149	99.0176	112.434	127.826	135.104	157.191	180.351	184.391	219.581	242.927	276.899	301.086	324.151	324.647	328.833	302.913	300.024	297.896	267.616	239.217	206.548	154.746	137.939
2011-03-19 11:37:35		0	0	0	0	1.19776	0	0	2.87796	1.78596	8.33288	9.72939	8.89212	11.0177	19.875	30.1979	34.7468	47.7853	35.901	51.4119	51.1288	52.7462	67.9452	70.6173	73.9526	77.1747	94.2571	106.323	109.136	121.168	122.262	157.061	163.463	217.746	214.654	226.484	251.969	303.011	285.827	311.034	312.766	294.113	320.144	285.409	253.442	237.205	213.81	167.061	125.186
2011-03-19 11:52:35		0	0	0	0	0	1.11192	0	3.83702	5.50859	5.69308	4.31667	11.0464	19.7751	23.9467	32.3577	40.7109	41.1324	45.4295	52.1933	55.6737	66.8837	65.2381	73.7808	76.6593	92.2212	97.0897	99.0772	120.039	133.371	129.053	155.947	185.07	204.864	203.524	239.968	269.612	269.571	275.863	312.863	331.574	330.234	285.048	296.454	253.133	215.078	196.875	152.937	121.186
2011-03-19 15:22:35		0	0	1.39721	0	0	1.11278	1.03219	3.83981	0.893689	8.33897	6.68163	10.7189	15.6751	27.5629	44.5792	38.0929	45.9179	50.4856	58.2478	54.7122	52.0093	70.1391	67.6638	77.5974	81.3532	108.167	114.433	109.213	118.696	124.814	148.796	175.04	182.822	211.825	250.002	262.155	294.779	293.465	332.353	313.261	282.821	316.553	261.725	257.576	205.913	195.322	161.697	125.3
2011-03-19 15:37:35		0	0	0	0	0	0	3.09689	3.8399	5.33872	4.19128	7.83849	20.5514	19.6276	18.6738	28.1258	34.6862	49.0853	54.7587	50.1032	58.5532	65.8574	69.9013	76.4683	81.099	95.6125	86.9978	88.559	111.143	103.53	144.002	132.386	166.21	173.359	232.919	248.668	268.862	263.185	319.762	309.974	304.045	307.009	292.45	286.587	253.021	207.84	194.301	171.368	122.081
2011-03-19 15:52:35		3.27205	0	0	0	1.19854	0	0	3.84003	3.57494	5.23901	9.45933	15.3742	10.1176	19.4407	29.6931	39.9154	45.0962	42.4449	53.7519	65.1679	49.7503	69.4343	64.1519	72.6423	89.9692	102.396	98.1122	102.293	122.806	127.919	157.454	180.06	185.805	213.021	251.991	269.347	292.554	284.201	328.561	292.957	308.175	293.291	274.964	258.261	218.157	178.157	164.205	130.996
2011-03-19 16:07:35		1.6358	0	0	0	0	0	4.33516	1.37424	4.79865	6.67183	10.4727	13.8393	15.3063	25.6907	37.5907	38.6266	50.3635	51.4298	59.2468	59.699	72.0731	60.1872	74.2138	84.6077	86.8135	94.5311	110.259	109.121	109.504	129.641	151.911	163.706	181.33	197.234	245.206	266.02	306.3	298.199	324.753	299.772	294.441	299.441	280.1	249.547	201.084	176.538	161.793	124.417
2011-03-19 16:22:35		0	0	0	0	1.19854	0	0	0.595353	4.80766	6.67135	11.1904	12.4809	24.8263	25.1216	41.7391	43.9849	43.2625	55.6913	54.4987	65.1936	67.9016	65.908	71.5141	79.5603	83.4901	100.445	107.584	117.533	122.821	138.199	137.596	162.873	217.482	227.155	242.678	259.355	292.394	301.795	299.98	295.905	294.393	295.146	260.046	259.137	228.119	183.277	157.71	137.686
2011-03-19 16:37:35		0	0	0	1.29401	0	0	2.0646	0.959997	6.25583	11.0736	10.4014	12.5146	22.6599	26.8281	33.8247	35.5317	49.2138	59.0321	59.1189	63.3183	63.6587	68.2106	71.991	78.7061	86.6125	89.8333	107.135	110.379	114.569	140.237	165.579	164.407	182.698	227.61	242.007	235.585	276.689	298.684	305.815	306.424	302.937	299.371	266.889	246.384	225.537	185.084	146.703	127.154
2011-03-19 16:52:35		0	0	0	0	0	3.33798	2.06454	1.91987	5.34077	10.8604	3.92304	12.2504	27.3568	25.0136	37.6317	41.4099	54.0577	44.7663	65.2814	63.0686	73.2497	67.108	82.3833	71.6333	87.9554	96.3756	118.439	111.421	115.963	138.121	150.232	147.181	197.542	194.087	237.989	245.062	277.376	308.878	312.602	325.276	305.188	293.159	280.579	243.387	218.468	179.303	152.748	122.616
2011-03-19 17:07:35		0	1.51202	0	0	3.59593	0	3.09696	1.91993	5.36385	6.08615	16.8648	19.3301	22.369	27.0483	33.1103	38.3913	63.1958	55.075	62.6285	71.9692	61.2196	64.0628	67.9112	72.2285	97.2224	106.228	94.2231	127.498	126.372	131.388	140.853	160.753	201.254	208.207	239.05	262.604	288.341	300.958	303.415	315.837	303.009	277.42	274.9	239.583	229.359	187.524	144.141	126.968
2011-03-19 17:22:35		1.63572	1.51206	0	2.58798	0	3.08035	3.33603	0	1.78722	5.83728	8.96881	14.376	22.2803	26.7332	40.6535	43.0196	50.6131	59.5881	61.2535	66.3865	65.5538	63.1846	70.3218	79.7657	82.2744	88.6846	109.591	105.914	105.076	136.514	148.484	162.624	196.004	213.393	236.28	263.934	259.075	288.371	281.835	287.78	289.559	289.287	286.118	253.598	226.871	208.371	158.365	128.187
2011-03-19 17:37:35		0	0	0	1.29389	1.19852	1.11278	3.09684	3.83981	7.14929	5.8376	9.71702	10.127	19.2662	26.4806	37.5686	41.7519	50.8946	53.7657	55.1141	66.8798	72.1311	62.1074	69.9699	73.3603	89.2538	88.117	112.206	118.475	131.382	150.196	162.636	159.475	189.726	198.9	230.557	267.146	274.103	304.429	290.056	313.932	303.529	284.053	273.822	243.317	228.594	184.784	171.961	117.5
2011-03-19 17:52:35		0	0	0	0	0	2.22558	0	5.7601	3.53561	5.87452	13.5993	10.0663	17.4749	33.5061	36.5731	37.7375	45.3106	59.3712	69.3599	62.9423	64.6535	66.8362	76.8811	77.2106	95.1452	91.7593	110.138	117.009	120.372	127.845	135.621	164.872	191.943	210.871	245.086	298.291	284.517	293.476	293.151	302.125	300.319	260.609	282.25	216.454	223.728	193.884	158.065	135.327
2011-03-19 18:07:35		0	0	0	0	1.19852	1.1127	4.12885	3.5016	6.56388	5.27026	11.3631	7.18638	14.2817	27.502	34.6577	45.7878	52.2554	55.7333	58.5506	60.4458	67.1554	56.2391	74.5237	80.4936	90.6	86.1657	123.363	109.638	117.406	132.334	155.188	170.048	200.683	212.128	252.696	260.601	258.071	284.217	315.637	321.314	303.271	297.472	293.151	273.101	215.846	190.647	152.456	141.122
2011-03-19 18:22:35		1.63586	0	1.39729	0	0	1.1128	2.0645	1.91995	8.91769	10.0247	7.08417	18.3377	16.1389	26.2213	35.2138	42.3728	51.9788	57.3401	57.3631	59.3324	63.4349	66.4071	79.0962	80.2125	93.5734	90.2019	112.518	115.361	124.337	136.874	145.028	173.283	189.283	225.238	231.336	239.746	281.859	287.097	292.746	312.779	305.425	305.897	270.389	255.643	224.347	184.423	158.922	132.498
2011-03-19 18:37:35		0	0	0	0	0	1.1127	3.34779	5.52577	5.3617	10.244	9.45042	17.009	22.4529	29.3347	37.8321	40.4766	40.5974	68.3933	65.0551	59.2391	67.9724	73.9606	66.166	83.9519	78.5266	91.8042	101.798	101.584	123.209	147.157	163.253	179.771	212.921	208.143	218.698	234.882	270.018	275.677	282.43	307.065	295.413	283.8	262.468	256.18	228.355	171.336	144.782	127.444
2011-03-19 18:52:35		0	0	0	1.29401	0	2.22546	2.06438	2.87983	4.46801	5.83718	9.71929	18.6907	25.4273	28.1559	38.2285	45.6349	60.7256	58.8734	64.1221	63.124	67.0942	72.8077	77.5109	57.8724	91.4715	91.1913	106.816	95.1772	121.101	137.951	132.843	164.153	189.431	228.816	230.14	241.625	251.036	281.136	295.587	292.678	293.029	293.488	269.291	249.71	212.811	186.01	148.363	132.863
2011-03-19 19:07:35		0	0	1.39739	0	0	2.2255	2.0645	1.91989	4.46833	8.33949	8.75647	13.7216	22.0862	36.892	28.5411	52.6244	57.9952	64.2994	65.1029	58.5481	67.791	67.116	76.8811	75.0016	93.6676	97.0811	107.073	105.842	119.071	136.953	148.145	167.544	192.732	207.229	222.997	239.253	264.201	293.904	303.702	302.242	321.679	292.26	274.341	254.826	222.969	172.468	172.648	121.148
2011-03-19 19:22:35		1.63582	0	0	0	0	0	2.06434	2.87979	4.46824	12.5089	12.0293	16.2608	22.8628	29.521	37.8724	46.6199	52.6929	65.8311	58.8917	53.7394	71.5933	59.1446	61.4183	84.9522	85.1013	89.9545	102.725	114.786	119.654	142.216	142.522	191.529	188.816	211.979	245.098	251.673	290.351	293.017	309.249	299.367	289.361	288.836	269.391	229.864	209.555	184.337	164.311	115.894
2011-03-19 19:37:35		0	0	0	0	0	0	2.0643	4.79939	3.56814	6.09301	15.5971	15.1693	20.1854	35.0439	33.8571	46.9276	48.4292	59.4955	65.8929	65.4109	65.1295	67.3744	72.0253	69.7304	80.6468	90.8208	94.5442	113.701	118.564	129.786	156.406	173.556	187.009	219.968	234.87	264.355	275.154	269.676	307.967	280.833	288.764	283.299	251.294	267.009	216.841	182.288	164.459	138.662
2011-03-19 19:52:35		1.63574	0	0	0	0	1.11268	0	4.79933	4.48891	5.76087	12.1369	20.8011	14.0757	26.7492	37.0128	44.1782	54.5404	62.8442	68.4657	63.5131	68.5821	62.9622	69.9077	66.8224	76.3744	86.2952	101.863	127.274	128.978	133.988	160.939	170.066	189.293	206.957	212.139	258.73	275.168	302.173	308.644	298.632	308.874	302.57	267.792	241.164	209.489	191.176	150.675	115.279
2011-03-19 20:07:35		0	0	0	0	2.39688	0	0	3.83929	3.5742	15.0086	9.6558	15.339	16.7288	33.1776	40.1763	41.7984	47.2849	57.5003	59.5872	57.7038	73.9218	67.7907	65.7125	77.8548	74.433	89.4667	96.4394	117.576	119.451	128.54	152.965	167.921	203.333	208.273	226.647	255.078	272.52	287.268	302.62	296.278	297.133	285.751	263.267	257.718	212.811	185.409	152.41	120.38
2011-03-19 20:22:35		0	0	0	0	1.19846	1.1128	1.03211	3.83958	1.78716	11.0925	12.4174	18.9257	20.8768	35.9763	38.1272	52.424	51.1753	51.6138	53.9244	67.4843	62.1676	67	69.8064	71.1401	84.2304	90.3263	102.783	126.21	121.007	120.761	143.434	172.312	189.832	216.853	240.976	280.425	260.395	286.913	287.628	296.933	305.439	272.364	260.172	234.734	219.942	194.103	159.792	128.512
2011-03-19 20:37:35		0	0	0	0	0	1.11268	2.06426	4.79907	3.57397	7.77974	12.1976	13.8678	24.2302	30.7692	33.5244	43.291	55.7115	59.5131	59.917	57.8625	69.3769	71.2622	72.2929	58.1205	72.401	96.4096	95.9885	110.524	120.136	144.724	147.496	157.318	188.724	192.816	234.545	249.872	263.532	268.584	314.016	305.012	281.564	284.87	255.182	242.059	200.12	178.976	158.434	114.509
2011-03-19 20:52:35		0	0	0	0	2.39683	2.22516	4.12846	5.75878	8.93535	8.60308	12.1564	23.1521	19.2267	28.5809	44.624	45.6801	48.6583	58.5926	65.6192	72.9513	64.6	70.4519	59.8795	69.7779	79.8388	78.9782	106.922	118.249	123.338	116.004	163.105	178.963	187.829	197.967	229.573	254.503	247.901	270.763	291.58	292.099	283.081	277.29	253.93	249.022	216.33	183.46	161.548	143.476
2011-03-19 21:07:35		0	0	0	0	1.19846	1.11262	4.12846	0	4.4967	6.64346	12.0433	18.4074	26.3894	29.1813	45.9747	48.3859	56.4224	72.9269	70.2394	66.9901	73.8154	60.9929	82.2724	78.8388	90.3077	92.5583	99.6263	101.202	110.683	136.829	147.762	155.174	178.974	212.159	230.573	245.441	261.907	294.437	298.111	289.527	280.271	280.346	253.586	232.78	222.432	158.626	142.258	121.843
2011-03-19 21:22:35		0	0	0	0	1.19848	1.11258	6.1925	2.87951	4.46785	5.00308	10.7714	16.7054	17.6217	37.7603	27.018	52.9849	62.1878	54.5984	57.2734	72.9849	62	74.058	74.3279	72.7865	83.541	99.8087	97.1949	108.201	96.592	111.237	152.518	157.71	159.864	201.833	236.614	278.458	258.926	288.968	287.596	287.324	283.033	236.777	256.763	237.881	238.027	177.043	148.838	113.63
2011-03-19 21:37:35		0	0	0	0	0	1.11244	1.03211	3.83862	3.57378	10.2882	10.2399	20.8566	24.8065	27.3418	33.7593	40.8529	58.7881	67.3827	69.4054	68.8689	69.0465	62.4747	70.376	80.8779	78.7763	87.7849	92.6349	101.796	113.766	131.382	158.521	158.846	191.582	195.683	215.178	253.604	269.301	283.628	278.92	306.823	288.129	279.121	243.069	218.794	197.426	164.04	150.581	124.127
2011-03-19 21:52:35		0	0	0	0	0	0	4.12821	1.91955	6.25452	5.00276	7.99971	17.7894	26.2738	37.9179	35.7785	50.5061	68.2638	62.6221	53.4824	64.9769	71.5484	66.3301	70.2468	69.2369	83.9913	93.7862	97.3362	105.578	110.961	121.43	140.843	161.893	180.13	192.33	222.36	262.814	246.585	266.494	296.32	297.256	290.457	273.269	244.315	234.718	212.808	172.726	153.029	112.857
2011-03-19 22:07:35		0	0	1.39704	0	1.19832	1.11264	0	0.959737	6.25458	10.0056	14.2088	18.2286	18.5928	28.7392	47.9811	52.5301	48.8869	59.341	65.1734	63.5375	61.4933	58.6545	68.0356	61.1295	80.4013	80.8321	105.317	96.5212	98.9878	128.303	130.963	156.897	181.937	186.17	253.678	236.593	256.959	279.167	258.418	295.002	264.651	271.707	270.343	236.913	207.923	162.25	147.912	120.174
2011-03-19 22:22:35		0	1.51188	0	0	1.19846	1.1127	3.09651	0.959817	8.93596	8.33853	9.98516	19.1438	25.751	31.113	38.2484	50.7737	58.6147	51.5788	67.2346	62.6776	65.6471	60.817	65.9429	69.8308	74.9907	76.208	103.358	113.279	122.674	130.12	140.167	157.576	169.379	188.59	220.737	248.245	282.746	288.363	300.409	292.45	284.293	263.744	243.354	229.808	192.534	178.081	136.947	124.856
2011-03-19 22:37:35		0	0	0	0	0	0	2.0641	3.83933	8.95798	11.6531	11.4709	25.6536	19.1	28.1172	32.3128	39.9801	58.6196	57.7881	56.5372	59.2337	64.1779	60.4087	63.0237	77.0603	76.924	86.5337	97.5154	108.547	122.013	115.529	134.613	161.308	176.787	197.181	223.554	241.819	252.576	278.63	280.455	289.359	269.125	257.586	242.694	216.588	186.432	163.041	146.995	126.412
2011-03-19 22:52:35		1.63554	0	0	0	0	1.1126	0	0.959776	4.4676	6.67045	13.456	18.0127	22.7155	34.2125	43.8439	50.2096	63.6673	61.4449	76.1984	57.6583	62.6946	66.4981	72.2625	70.7093	84.4622	67.4016	99.3763	108.712	108.637	149.139	172.236	167.975	176.811	206.456	247.071	213.848	262.181	262.837	289.525	276.118	272.804	277.264	253.646	231.088	204.225	157.764	149.754	111.908
2011-03-19 23:07:35		0	0	0	0	1.19848	2.22514	2.06432	1.589	1.2084	8.3316	14.6793	23.1725	24.0441	35.0599	31.4541	50.1051	69.6551	73.8933	63.7006	67.9574	65.8641	62.7029	66.9657	68.4282	76.7391	91.7446	96.4032	104.785	127.67	137.065	131.58	170.541	173.317	194.942	232.049	241.414	256.008	277.854	277.093	267.582	274.275	258.169	241.819	233.596	203.918	175.507	155.277	118.563
2011-03-19 23:22:35		0	0	0	0	0	2.22528	1.03213	1.91967	5.35045	9.18356	13.4433	16.8801	26.9754	32.9779	53.8433	51.4042	52.3112	75.4583	77.7196	68.7061	58.0228	60.2554	66.9987	71.1811	73.9115	83.6564	101.353	112.032	101.875	130.597	144.241	153.089	180.385	194.702	206.176	223.157	264.944	268.133	272.598	295.545	271.46	264.361	264.13	253.47	193.169	187.706	144.718	112.475
2011-03-19 23:37:35		0	0	0	0	0	3.33782	2.06414	0	5.36119	7.76202	13.9039	11.4395	33.5657	33.7702	41.9958	58.1946	64.1494	73.3571	61.5974	61.5045	65.6644	62.5231	85.0417	67.5317	86.5369	84.5974	92.909	116.574	113.89	110.526	141.751	161.807	176.082	175.949	223.838	233.486	264.97	286.31	281.102	281.669	273.379	259.563	240.711	213.055	194.673	171.699	143.341	108.773
2011-03-19 23:52:35		1.63552	0	0	0	0.404728	1.6257	5.36837	0	8.04256	9.43016	12.0809	15.3958	24.7338	39.9343	43.2394	51.1769	65.267	69.1154	72.6651	58.5349	72.9667	70.184	68.8619	70.9974	85.2689	86.3939	88.2077	95.6638	115.789	121.727	138.245	161.206	160.689	185.174	207.574	245.15	258.375	261.512	295.469	280.03	273.071	242.4	235.266	216.3	204.976	146.861	142.746	120.285
2011-03-20 00:07:35		1.6356	0	0	1.29379	1.19842	0	0	3.83962	2.68077	8.05798	10.3029	16.3412	26.1779	35.0333	45.0926	47.6897	49.6038	60.1038	67.7801	54.3314	76.6516	70.9804	75.5772	70.4542	84.3038	87.4715	100.095	103.309	114.369	125.002	144.133	158.055	166.166	184.315	225.917	225.879	264.766	261.883	259.054	286.484	260.92	277.776	246.613	215.857	204.014	153.724	123.65	120.244
2011-03-20 00:22:35		1.63574	0	0	0	0	0	2.0639	2.87931	4.46788	11.6737	17.2527	21.5428	24.6971	37.1516	40.2282	58.9503	71.5125	60.3788	62.0776	78.2128	75.5115	73.8901	62.8446	69.5151	73.1276	81.9849	108.324	104.597	107.008	129.621	136.452	154.623	169.545	194.772	214.776	245.15	235.311	272.682	296.458	289.441	258.007	262.712	250.274	231.02	194.553	141.629	131.112	111.434
2011-03-20 00:37:35		0	1.51206	0	0	2.39708	1.11266	2.06442	5.40869	6.5816	15.2704	13.9385	23.3325	15.3441	30.619	45.9388	55.042	74.3035	75.866	85.9314	68.8199	72.6417	58.9397	83.7099	70.0455	76.916	99.7045	96.3096	116.366	112.276	127.706	127.81	155.958	166.757	189.359	215.202	240.002	270.529	252.947	277.6	262.851	255.262	248.362	235.06	219.054	189.369	162.875	138.536	113.532
2011-03-20 00:52:35		0	0	0	1.29389	1.19852	1.11272	2.06442	3.83962	5.36176	9.17282	11.8492	17.6623	30.2636	31.6556	47.4471	54.6385	74.9481	71.6853	72.9769	79.0875	66.5894	57.2369	73.8179	76.7285	80.4564	84.584	111.769	106.961	103.494	110.519	135.048	140.473	173.546	198.47	220.164	246.004	245.597	247.71	261.675	256.695	261.462	240.907	244.427	195.427	175.054	152.586	143.994	113.405
2011-03-20 01:07:35		1.63606	0	0	0	0	0	3.09681	0	7.97381	9.46644	22.1935	18.4261	22.3307	39.6641	46.5747	51.6583	60.5349	71.2619	67.7897	68.3288	73.8192	70.7872	59.716	74.0651	82.5571	75.3875	92.0417	101.972	119.429	145.579	147.718	153.578	170.499	210.699	213.235	222.672	245.585	241.442	271.737	260.246	253.209	244.954	241.524	196.328	181.917	161.516	142.967	113.989
2011-03-20 01:22:35		0	0	0	0	0	0	1.03235	3.84006	3.57471	6.6716	14.113	19.2328	28.7097	29.6875	45.9026	61.308	65.9333	80.8375	76.3788	63.2676	70.7016	72.1554	68.9128	72.7859	70.9926	92.8324	100.052	92.1792	106.34	112.11	132.444	142.588	163.103	203.878	199.267	215.838	225.695	263.169	269.553	260.855	258.249	261.875	235.427	232.967	188.798	164.229	132.468	103.793
2011-03-20 01:37:35		1.63596	0	0	1.29405	1.19886	3.33849	3.09712	3.83997	7.11554	6.7041	13.7584	21.9692	27.8635	32.708	35.0869	56.2715	54.6663	59.5317	70.9824	71.3288	60.399	66.3337	79.7304	78.1824	75.0051	91.9779	96.3779	95.5301	109.218	118.547	137.955	148.548	154.369	186.422	222.452	227.292	244.94	260.871	261.933	264.431	251.697	248.235	238.455	213.778	185.072	176.761	137.121	104.908
2011-03-20 01:52:35		0	0	0	0	0	0	1.03227	1.92009	2.68113	12.5092	10.6354	24.6196	27.337	44.9933	53.7141	62.692	70.5526	73.409	82.7138	70.9689	65.5237	86.7212	63.0407	74.217	73.2176	88.4042	92.742	100.259	125.08	130.403	124.705	164.399	178.928	184.678	203.195	229.107	265.853	253.642	276.643	259.371	266.989	252.208	227.766	201.753	181.292	158.101	121.007	104.845
2011-03-20 02:07:35		0	0	0	0	0	0	2.06452	1.92001	11.5736	7.54817	11.1415	13.4731	22.9095	32.2186	47.1131	48.3849	59.5798	68.4042	71.1279	67.6141	71.7821	67.076	68.1077	68.1978	88.7747	94.1776	103.548	106.322	114.865	127.072	135.346	155.261	170.533	189.88	229.713	225.673	241.316	255.611	263.179	250.847	270.962	259.517	215.767	212.576	190.743	169.828	125.938	103.341
2011-03-20 02:22:35		0	0	0	0	0	0	1.03241	0.960016	7.15026	3.53138	15.3048	18.7021	29.6226	32.1429	46.1965	56.4747	76.8263	69.8228	77.359	79.5974	67.4913	63.8446	76.809	75.3955	85.6381	91.5349	94.833	101.226	95.9497	109.287	139.864	136.881	177.139	196.432	220.38	243.323	244.267	236.801	254.679	280.354	261.727	242.045	220.705	212.296	184.395	162.246	134.179	102.395
2011-03-20 02:37:35		0	0	0	0	0	0	1.03227	3.83994	7.09292	10.0625	17.2802	20.3587	30.1779	40.9256	45.5458	56.9901	73.3795	77.5804	64.883	66.5821	61.3266	68.3846	74.4974	71.9308	92.1122	82.9064	107.346	121.464	108.942	118.097	135.895	149.986	157.29	164.079	198.243	227.737	243.75	252.468	270.821	278.139	250.182	233.313	245.25	203.664	184.908	160.084	131.372	113.462
2011-03-20 02:52:35		0	0	0	0	0	2.22578	2.06492	3.84058	0.893769	6.88615	14.8155	18.1624	35.4417	31.1252	48.7551	50.5266	72.2824	61.9365	69.724	75.8272	76.7635	74.6253	79.4385	74.4971	88.8564	91.9676	101.961	88.7718	116.905	121.622	129.932	155.317	187.041	204.273	210.08	243.426	251.999	257.498	256.104	263.441	255	244.367	242.069	214.633	186.242	145.87	133.007	116.583
2011-03-20 03:07:35		0	0	0	0	1.19886	2.226	0	8.64115	4.46926	8.34087	19.1855	13.9741	25.8562	40.8016	45.0715	60.5029	65.8788	75.034	67.1494	79.4535	70.1817	55.1378	72.7176	72.0221	76.8885	88.4032	109.092	110.786	113.177	122.371	144.573	163.413	156.04	202.716	217.029	239.449	247.556	234.407	275.926	247.438	245.92	246.949	235.551	202.147	176.747	154.003	139.689	105.295
2011-03-20 03:22:35		0	0	0	0	0	2.22586	3.09747	2.88049	5.36301	8.34083	17.2706	27.1893	28.7246	30.6543	45.7881	57.8817	68.5061	72.508	90.0772	73.2766	74.5622	68.6872	71.5811	83.4683	82.6333	86.7263	117.428	103.304	106.921	109.396	139.786	168.916	167.33	189.377	214.834	255.705	238.155	266.855	282.973	252.552	252.226	232.085	224.587	198.6	184.447	146.31	136.114	106.238
2011-03-20 04:22:35		0	0	0	0	0	1.11308	0	4.80067	10.7257	10.0089	15.017	13.8504	29.1635	29.4155	50.1208	50.4109	58.7138	70.0372	65.2205	66.2538	73.5494	69.908	76.0731	80.0497	96.0548	101.663	117.108	114.377	123.175	131.418	146.627	153.355	169.145	171.034	189.343	240.891	250.461	257.646	250.745	246.805	239.842	221.138	231.442	202.069	178.54	161.585	124.169	106.624
2011-03-20 04:37:35		0	0	0	0	0	1.11312	0	1.51256	7.47747	10.0584	14.3216	16.3141	20.3069	39.3051	46.1423	42.9369	64.924	61.1824	60.6003	62.8394	69.0628	79.0253	80.7962	91.8423	97.4756	122.133	112.773	109.649	131.771	114.652	139.405	159.95	176.498	197.178	199.788	229.161	226.064	239.934	248.455	259.365	252.146	224.617	222.628	188.904	179.752	147.029	113.278	103.104
2011-03-20 04:52:35		0	0	0	0	0	1.1129	4.13006	0.960215	7.98692	10.2391	14.9601	21.923	18.1515	27.4992	36.599	40.8433	46.4558	48.5029	58.3138	50.4965	61.808	81.3343	109.256	115.749	147.224	141.112	124.137	134.99	132.231	140.148	141.062	135.144	162.356	196.032	205.793	199.567	235.535	260.395	275.537	259.167	251.394	240.729	220.509	197.686	169.932	150.248	128.826	92.484
2011-03-20 05:07:35		0	1.5125	0	0	0	2.22592	2.06506	3.84071	2.68143	8.34106	10.1715	11.9746	27.4443	46.3856	46.4436	65.5314	62.7779	59.6442	65.3728	64.4394	63.3971	70.8837	82.6728	85.6904	89.1571	106.401	116.689	104.783	116.247	131.296	136.486	155.883	173.82	174.697	198.938	229.814	218.293	244.692	281.036	278.662	270.755	255.928	232.744	219.473	169.319	145.761	132.678	100.257
2011-03-20 05:22:35		0	0.988721	0.484054	2.58884	0	1.11318	0	5.76173	6.2583	13.6406	11.5554	36.0628	19.925	43.4356	42.4804	56.8859	58.2891	64.8109	60.4801	67.3721	73.7772	69.5006	82.5141	94.6827	90.4465	105.342	110.649	125.045	123.635	132.598	145.433	155.545	164.405	200.687	212.516	236.761	240.172	263.846	271.671	278.173	263.039	254.147	217.776	229.319	184.599	143.898	140.87	106.312
2011-03-20 05:52:35		0	0	1.39782	0	0	0	2.06518	5.76221	4.47013	14.3168	17.0094	24.7608	25.2999	38.9256	56.1029	58.9545	60.0019	66.9657	58.4301	61.109	58.8901	79.2436	89.8971	77.3179	106.758	108.166	122.117	133.141	128.099	139.729	152.292	171.202	164.051	187.286	209.261	226.35	244.631	263.856	281.146	270.042	280.979	269.343	242.073	219.866	185.603	162.923	117.754	99.349
2011-03-20 06:07:35		1.63658	0	0	0	0	1.11326	2.0655	4.80189	7.0317	9.42801	10.5586	22.9782	21.8466	39.284	43.8189	48.1734	54.0022	55.6035	52.0106	53.7782	62.7256	68.6958	71.908	88.7327	93.5218	99.0673	114.77	120.565	106.384	144.022	132.229	151.923	182.52	195.759	220.581	245.933	280.745	291.274	304.104	296.352	268.626	255.803	241.897	224.026	181.454	160.851	133.552	103.607
2011-03-20 06:22:35		1.6366	0	1.39786	0	0	1.11326	3.2358	5.63449	4.47048	8.34292	14.9355	20.2604	28.7162	42.7311	42.5679	57.9795	70.2955	59.8276	74.0109	76.2016	70.2769	65.0766	76.3093	81.2449	106.528	95.5138	107.044	102.508	117.897	133.74	156.328	169.954	157.228	209.736	218.678	220.843	249.074	263.894	275.869	265.292	246.564	261.43	240.707	207.502	184.67	156.823	129.283	105.476
2011-03-20 06:37:35		0	0	0	0	0	2.22684	3.0986	6.72356	7.15375	14.2778	19.0134	32.941	30.7494	45.5125	50.176	60.2667	73.0282	66.2574	70.617	69.2519	75.2497	86.0365	76.6494	90.3635	97.8529	114.848	116.114	123.952	114.073	130.393	136.833	140.739	182.444	181.793	211.008	237.58	243.806	276.887	252.568	264.441	235.385	238.896	215.204	206.767	156.979	147.29	137.602	104.045
2011-03-20 06:52:35		0	0	0	0	1.19928	0	2.06572	1.43313	3.1368	11.0814	9.23112	22.1546	32.6141	40.6942	51.316	60.7772	63.4045	64.7955	74.142	73.8756	68.4962	64.617	74.3135	90.1234	117.407	96.4516	120.918	116.974	92.6619	128.173	135.471	157.188	172.159	205.467	219.688	249.902	252.146	267.769	290.284	255.174	263.812	250.024	248.346	212.696	181.322	170.751	138.537	94.2561
2011-03-20 07:07:35		0	0	0	0	0	1.11354	2.06611	0.960638	6.97237	10.2543	18.0488	22.7594	20.6296	38.4173	50.7837	53.0157	62.9513	60.9321	70.1814	64.1298	67.9689	64.1926	82.8513	91.6506	86.8917	99.0532	123.247	114.914	122.819	122.686	137.104	140.324	173.179	184.129	232.178	224.101	281.969	282.125	283.995	293.045	274.05	248.446	234.072	211.128	181.803	147.686	133.876	114.242
2011-03-20 07:22:35		1.6372	0	0	0	0	0	1.03293	2.88181	6.26022	11.7561	18.1931	17.4652	35.1718	42.9119	54.5147	62.2808	59.099	68.4519	66.5718	76.1628	68.4526	80.7397	82.0763	99.9769	91.5795	103.902	121.532	117.623	118.866	117.126	139.345	145.429	185.17	184.537	228.502	240.521	281.887	279.021	293.245	275.829	266.168	261.919	228.86	214.193	179.938	161.979	124.794	117.771
2011-03-20 07:37:35		0	0	0	0	0	1.1138	0	3.84285	10.7326	8.34657	16.4041	26.359	35.1423	40.5125	45.059	66.5554	63.7734	68.3215	76.1628	80.0452	79.3487	78.2253	78.5962	93.6295	91.2571	110.728	114.896	112.483	118.037	129.135	142.903	162.258	168.199	179.549	204.395	237.959	286.787	255.024	273.123	270.038	278.109	257.993	234.694	207.476	194.689	166.298	122.945	108.375
2011-03-20 07:52:35		0	0	0	0	1.19952	0	3.09928	3.84282	8.94378	14.1879	16.3814	20.1815	32.0558	35.8462	53.5285	68.5151	65.9712	75.2987	71.7929	68.2522	68.9378	71.4417	88.0532	86.6455	89.8218	103.244	116.528	112.133	116.183	114.154	132.83	158.327	150.891	194.694	226.677	261.208	252.776	276.242	292.965	274.247	258.722	239.407	227.929	209.411	178.407	146.414	134.832	107.001
2011-03-20 08:37:35		0	0	0	0	1.19932	1.11342	1.03289	1.92104	7.15356	11.6824	17.2307	23.0511	42.6468	39.1901	58.9946	62.1096	70.3093	89.6426	92.4939	82.951	85.1881	62.1215	80.1756	80.1051	81.9821	101.556	108.462	110.563	125.406	124.081	136.773	140.921	159.511	210.883	219.353	252.883	274.665	265.252	293.552	269.283	254.85	253.84	246.691	205.405	199.644	146.731	141.687	103.763
2011-03-20 08:52:35		0	0	1.39836	1.29439	0	2.22666	1.03275	0.960298	8.0466	12.5156	16.3485	21.5385	30.7862	42.4016	52.7936	71.0038	83.1256	81.5446	68.9442	78.8202	85.841	76.2115	74.983	83.3013	96.8545	92.0756	92.4372	103.442	105.873	110.171	145.084	157.995	165.553	191.689	209.662	245.931	246.005	278.55	291.745	259.045	257.017	242.4	221.893	220.783	193.433	162.263	133.227	99.534
2011-03-20 09:07:35		0	0	1.3979	0	1.19906	1.1132	1.03259	4.37285	6.65692	6.83542	12.5344	29.0132	26.3297	32.1442	47.3417	50.0718	52.3106	55.0356	46.9186	64.051	64.5936	68.9026	62.1968	80.4308	77.8705	74.8635	105.028	113.58	119.059	125.176	148.329	161.905	168.093	183.281	240.655	249.854	251.749	273.692	291.358	295.515	278.666	259.235	233.678	219.455	183.586	163.866	117.003	111.838
2011-03-20 09:22:35		1.63636	0	0	0	1.19896	1.1132	3.09802	4.36314	6.66625	5.83965	12.498	15.8022	30.7678	43.4465	57.534	58.6564	53.4846	70.8917	76.3708	77.0715	64.3333	75.7792	76.8612	86.9641	86.3772	82.2673	93.7478	106.553	97.9731	126.262	162.65	159.573	179.563	195.499	222.438	225.254	261.106	278.117	280.062	282.452	269.435	253.367	262.664	198.864	175.242	143.834	125.679	106.967
2011-03-20 09:37:35		0	0	0	1.29427	0	0	1.03251	2.88095	6.14237	16.7925	17.1546	19.2854	30.9942	45.7074	67.0904	68.3994	76.6545	64.6016	63.9282	70.416	65.734	83.509	79.9317	81.425	87.3103	108.178	106.474	113.935	108.28	121.23	137.688	150.074	175.06	200.833	230.773	247.43	264.369	266.114	293.221	292.875	280.184	260.955	244.443	217.662	189.509	154.01	125.817	103.783
2011-03-20 09:52:35		0	0	0	0	0	0	1.03257	3.84122	3.57622	8.34218	12.8938	25.8329	29.6743	34.1487	60.1673	61.6933	56.4721	69.3359	65.1189	70.5715	73.0942	61.1606	83.5564	83.8397	92.3551	110.516	103.205	116.297	109.766	130.415	137.782	160.152	184.671	196.356	219.191	224.98	262.506	271.016	274.123	291.278	257.975	245.751	239.896	223.922	190.17	155.385	127.258	122.909
2011-03-20 10:07:35		1.63678	0	1.39794	0	0	1.11338	2.06579	2.88171	6.25917	11.79	8.95022	18.1916	36.3321	40.4365	60.2433	52.1426	63.4798	62.6702	66.8567	62.6558	61.3202	62.817	86.0471	86.4317	94.8449	103.519	108.042	105.432	134.571	115.871	145.839	160.335	178.093	198.037	195.004	255.05	258.339	266.096	272.504	277.131	281.913	244.054	229.966	218.704	180.595	157.875	129.155	105.153
2011-03-20 10:22:35		1.63688	0	0	0	0	0	1.03269	6.72404	5.98631	12.9088	13.5515	22.5445	34.2747	50.9026	49.5067	55.0237	63.0599	75.6503	66.6372	67.7494	57.3599	73.1862	69.0708	84.2647	97.3769	109.366	121.104	124.71	121.462	133.762	140.19	172.861	192.088	186.637	190.182	225.809	248.455	280.076	259.952	291.771	256.5	230.998	226.667	197.949	178.303	158.968	127.388	113.079
2011-03-20 10:37:35		1.63696	0	0	0	0	0	3.09838	2.88161	8.04747	3.44644	14.373	15.7233	35.6599	39.4269	40.5288	56.3449	52.1583	61.5215	62.3074	62.7375	67.4324	61.3939	76.0503	87.7897	99.7	108.398	121.062	120.002	122.983	141.094	141.53	172.458	171.603	186.342	194.505	231.026	247.239	266.749	272.774	268.153	267.308	255.108	207.127	200.695	189.189	142.306	116.294	102
2011-03-20 10:52:35		0	0.977965	0.49417	0	0	1.11328	3.0982	1.92071	7.92904	10.1216	13.472	14.457	22.9241	41.7913	40.408	49.5016	58.1256	56.7481	65.1263	56.4385	66.126	79.876	68.7388	83.6321	92.2641	92.784	115.31	118.74	120.236	132.217	159.954	163.702	182.764	179.401	221.953	237.626	254.728	262.891	296.58	283.337	280.22	242.061	219.625	209.561	161.388	147.464	122.043	96.4628
2011-03-20 11:07:35		0	0	1.39798	1.29453	0	1.11336	4.13115	2.88129	6.14346	8.55744	12.869	15.7178	24.8407	35.2955	41.309	53.3474	51.3824	67.6237	58.8006	62.199	59.4724	55.7728	67.1904	81.9378	88.416	124.565	122.292	121.816	137.428	130.924	150.801	154.373	177.736	194.271	210.821	221.661	245.325	274.403	284.485	264.62	249.894	247.873	199.755	190.789	173.42	156.42	122.305	98.151
2011-03-20 11:22:35		0	1.51282	0	0	0	2.22656	0	2.88129	8.81269	6.91936	15.0899	21.9815	21.653	30.3494	36.6635	43.6173	51.609	45.1029	53.4612	59.184	63.7189	56.0679	71.5179	82.367	80.3971	106.154	127.993	120.931	124.029	130.697	150.168	137.025	175.843	198.237	228.139	253.365	258.962	284.824	275.088	277.258	255.425	242.65	229.754	196.258	181.286	151.356	137.518	103.085
2011-03-20 11:37:35		0	0	0	0	0	1.11334	0	4.81631	8.03385	10.1372	15.2069	25.5761	21.6392	33.9593	45.8615	51.2862	55.5837	56.6965	64.3631	51.5744	58.8792	65.6378	65.5317	69.1968	96.6071	107.717	122.167	141.072	132.676	119.694	146.264	148.455	172.957	193.836	226.903	231.03	254.597	273.081	270.245	256.058	250.923	247.334	226.791	208.111	175.264	146.657	134.038	100.204
2011-03-20 11:52:35		0	0	0	1.29485	1.1996	2.22708	1.03313	3.84253	2.68293	7.51061	13.783	15.6761	26.0304	38.3279	41.4112	44.2205	60.9795	59.425	54.9641	57.3378	61.3808	71.0452	68.0923	92.7295	90.0163	111.959	107.008	107.829	103.331	137.402	141.669	151.781	173.854	166.132	219.533	234.149	233.922	271.653	266.977	274.215	254.607	235.918	228.944	202.622	178.908	167.7	123.78	95.599
2011-03-20 12:07:35		3.27333	0	0	0	0	1.11334	4.1316	3.84234	9.83679	10.0129	9.72468	23.1346	26.4615	40.6311	36.2833	47.4849	42.5862	53.4894	53.2712	63.8038	60.4304	67.6612	81.2708	96.6715	105.45	113.949	133.742	124.095	127.394	125.894	146.368	153.804	153.171	186.937	207.73	219.477	235.899	236.729	287.53	268.003	246.24	231.056	230.288	191.136	157.592	135.994	124.766	96.6391
2011-03-20 12:22:35		0	1.513	0	0	0	1.11352	2.06561	3.84244	7.15359	11.7636	16.8954	15.966	30.4016	39.8734	42.459	40.8481	37.0394	50.0125	59.0179	46.6397	54.0314	71.2346	65.775	80.15	113.003	124.601	141.374	124.279	130.086	140.253	137.557	161.426	171.442	197.141	221.647	236.791	242.376	263.429	278.223	253.952	251.532	223.185	234.904	210.607	188.698	143.081	118.834	96.4378
2011-03-20 12:37:35		0	0	0	0	0	0	2.0655	0	8.79253	13.8433	16.1738	22.7109	27.7246	28.8554	41.7321	57.283	42.5702	57.249	55.0186	57.4779	55.1731	63.0369	59.4737	78.4343	84.3407	110.939	100.928	105.471	109.276	123.822	139.489	155.304	167.133	214.962	215.507	232.961	251.945	255.417	280.284	280.629	274.684	250.042	236.871	228.562	191.63	136.198	127.738	108.782
2011-03-20 12:52:35		0	0	0	0	0	2.94744	2.43047	5.26308	4.93731	8.3451	12.356	17.655	29.2284	23.4519	39.4946	33.1628	51.8875	61.9436	52.2538	40.1872	54.6138	64.6522	63.3875	75.1199	105.477	93.8218	98.6628	99.8987	109.954	116.604	123.041	171.625	187.302	186.376	225.978	227.238	245.479	283.249	278.361	300.354	263.736	254.106	251.622	192.919	191.627	157.24	132.151	110.791
2011-03-20 13:07:35		0	0	0	0	0	0	1.03305	2.88215	5.36631	10.0745	11.9835	20.2596	21.9169	38.0936	45.4923	56.5244	48.1462	60.7045	55.1622	47.8548	59.2542	58.7026	70.7849	68.7615	96.3388	89.7022	98.5038	101.334	128.285	122.866	137.843	174.191	189.029	200.05	223.76	240.795	242.859	268.157	290.3	272.811	282.009	247.795	247.318	233.744	188.598	166.633	119.784	100.182
2011-03-20 15:52:35		1.63764	0	0	0	1.19964	2.93263	1.41274	2.88285	3.57811	5.00821	9.12125	19.3489	25.1635	30.2742	42.6279	49.2965	59.2231	47.8891	65.2163	61.3622	58.224	46.7256	64.8388	67.5821	81.1769	91.3221	97.0202	108.077	123.929	140.132	155.96	181.148	193.984	199.271	230.685	254.067	272.434	284.72	293.007	273.471	265.749	261.352	232.386	211.537	183.265	148.289	137.38	113.823
2011-03-20 17:52:35		0	0	0	0	0	1.95427	3.54958	3.23215	12.9067	9.17519	20.2664	20.7251	22.2217	28.0847	35.0926	33.0196	54.5029	57.4083	48.2558	52.7689	58.9356	79.2212	71.2417	71.0609	79.3484	97.3952	119.735	129.038	144.365	158.343	163.66	175.705	182.286	196.322	225.938	234.84	255.23	267.107	282.528	285.314	292.514	247.464	253.071	223.77	208.113	163.049	133.816	104.691
2011-03-20 18:37:35		0	1.5125	0	2.58854	0	1.11306	2.0651	4.80109	10.7271	9.35032	19.2272	18.0333	21.0725	26.9601	36.1045	39.3631	40.5994	45.8859	53.3917	63.1263	63.9837	64.4176	56.1772	70.4465	77.6564	90.2048	99.7064	111.891	137.352	150.811	175.245	174.377	202.065	210.851	213.966	252.205	264.241	284.011	301.885	290.845	291.122	263.055	250.481	233.291	205.074	162.528	148.121	118.031
2011-03-20 18:52:35		0	0	0	0	0.338603	2.7383	4.39538	5.76109	9.83288	5.8391	14.6769	15.62	24.2974	22.8177	37.7856	43.441	55.3231	47.7208	65.251	53.2929	47.3692	54.4994	66.1984	75.6192	80.3458	106.267	123.766	122.78	118.676	161.579	151.442	171.27	198.976	227.897	212.21	242.65	259.649	259.665	270.655	288.255	286.126	257.993	246.062	229.261	211.012	162.418	124.129	120.19
2011-03-20 19:07:35		3.27285	1.51256	0	1.29419	3.5966	4.45244	2.0649	5.76141	13.3492	12.9487	14.8805	24.9357	18.0092	28.9395	35.8244	31.0659	40.3231	55.3782	56.7163	56.9452	60.5292	59.8933	72.7516	66.3333	72.608	98.374	111.233	122.639	140.002	153.101	156.825	182.558	198.428	212.941	221.25	235.761	253.664	255.717	266.933	280.329	272.857	277.65	240.689	233.041	197.534	166.2	140.795	118.497
2011-03-20 19:22:35		0	0	0	1.29429	1.19884	0	3.0976	5.34917	7.53458	9.5317	9.23724	15.7593	14.3252	19.1004	34.1894	46.8423	53.0237	44.1808	61.9545	52.7913	68.2154	65.475	61.1093	75.3138	99.8032	112.633	116.513	126.314	131.5	157.68	161.705	184.375	196.58	211.228	240.771	247.326	249.908	288.644	286.426	282.408	271.723	265.447	240.01	224.351	188.844	183.386	141.376	111.142
2011-03-20 19:37:35		0	1.51242	0	0	0	2.22624	7.22833	3.84067	6.25776	12.6513	14.1729	15.251	25.5375	25.484	41.0853	45.0221	53.7615	52.6696	60.6878	56.9692	59.2365	64.4795	65.2772	80.4542	87.7224	102.025	119.257	133.383	132.276	149.984	159.597	197.231	185.691	224.83	220.803	242.226	262.013	268.311	284.329	303.305	279.612	274.006	251.727	237.682	183.249	150.156	145.351	111.462
2011-03-20 19:52:35		0	0	1.39784	1.29455	2.3981	1.1131	2.06532	5.76157	7.15186	10.0107	9.98304	16.6102	29.6709	36.8449	34.0279	43.0785	39.1567	52.4468	60.4926	61.6942	65.8997	68.6269	78.0737	89.2417	85.4628	101.097	123.77	144.834	132.334	159.305	168.205	196.551	184.928	212.578	243.952	246.575	266.847	283.303	279.058	295.791	300.311	256.282	256.855	248.976	209.451	177.438	138.241	101.457
2011-03-20 20:07:35		0	0	0	1.29445	1.1991	3.33971	8.26157	6.72253	4.47032	14.3179	25.3231	21.7496	29.6292	25.4806	33.5006	52.5609	37.9196	44.6923	49.9933	70.2244	59.7875	74.6638	73.1109	87.2638	85.8183	100.261	123.796	124.102	140.1	163.916	173.229	182.178	204.652	209.213	222.338	242.706	282.618	288.362	311.614	301.727	313.998	290.777	247.454	233.504	209.766	181.352	147.528	112.274
2011-03-20 20:22:35		1.63664	1.51282	0	0	1.1991	2.22652	6.19702	6.72288	8.94074	12.6526	12.608	23.4339	26.1462	24.8155	33.5878	45.6731	52.3343	54.1019	69.9657	53.0708	70.0285	60.7734	66.8526	87.134	93.6846	105.938	117.272	135.963	136.927	163.209	191.941	189.501	190.148	202.059	242.163	252.179	271.486	293.892	290.014	308.037	278.82	269.323	254.537	236.472	196.588	170.627	131.648	115.327
2011-03-20 20:37:35		1.63648	0	0	0	0	1.90719	4.42753	7.19446	12.078	13.3489	17.683	27.4429	25.1308	29.4219	40.2824	46.4308	50.6128	49.016	51.7353	61.7449	56.6663	73.7715	71.9609	86.8375	93.9913	111.174	126.645	144.135	154.03	158.684	174.842	210.819	201.949	203.251	232.408	249.588	267.41	292.888	295.691	316.176	298.351	286.787	254.684	234.064	210.29	162.151	140.092	133.478
2011-03-20 20:52:35		0	0	0	0	0	3.3401	3.0984	4.80202	8.04718	10.0121	15.8988	20.7973	20.0142	27.1036	38.8821	41.7061	50.9442	46.1157	54.9542	57.3603	60.4295	58.7006	67.4465	78.6407	91.6526	113.155	139.74	134.371	174.225	172.594	163.554	195.601	208.381	188.666	207.188	262.704	284.908	274.862	295.896	321.699	302.472	284.079	255.655	272.895	209.806	183.436	143.616	126.466
2011-03-20 21:07:35		0	0	1.3981	0	1.19912	3.33997	6.19625	2.88123	5.36446	14.3025	18.1799	19.1052	25.0825	26.6973	46.3208	36.8994	40.016	51.7135	51.6301	56.7054	64.0295	71.6872	74.866	88.351	95.5792	114.024	130.611	130.403	158.211	172.933	184.321	192.121	235.15	212.039	225.523	242.779	297.915	294.938	285.697	296.685	303.8	289.689	260.112	244.704	209.654	197.498	152.706	121.735
2011-03-20 21:22:35		0	0	0	0	2.39856	2.22658	5.31522	7.05708	10.2884	15.8538	19.0138	21.9808	28.3526	37.5603	36.4369	42.0272	42.949	50.375	59.1346	54.3269	61.3609	68.1535	83.4474	89.2667	104.308	127.037	111.505	142.616	161.617	172.075	180.248	197.188	216.939	217.287	226.899	233.734	264.377	274.441	310.555	312.151	316.134	285.186	271.995	265.298	219.774	178.534	144.591	116.407
2011-03-20 21:37:35		0	0	1.39808	0	0	2.22664	5.16372	2.88163	4.47083	18.4688	14.0292	16.8476	24.9918	32.974	38.5439	36.5994	36.8756	49.949	57.1006	50.5455	61.5119	55.8048	83.6471	82.0981	90.9256	123.77	135.713	138.423	173.033	187.376	181.707	191.34	222.384	223.502	230.992	253.806	253.636	303.712	307.574	295.757	308.263	288.946	290.383	259.195	217.901	189.433	136.888	123.033
2011-03-20 21:52:35		0	0	1.39812	0.906208	1.78848	2.01442	4.13163	3.8416	9.83593	15.1159	14.4598	26.5469	29.5252	41.3952	36.9881	43.6365	43.1551	48.8167	55.6468	64.0353	59.5997	62.4692	64.2913	80.034	99.6769	116.531	133.446	125.481	152.42	171.887	170.423	191.122	215.547	221.545	238.76	253.93	279.625	289.842	314.421	319.383	286.18	279.415	264.615	242.909	201.919	162.846	157.406	125.304
2011-03-20 22:07:35		0	0	0	1.29461	2.39844	0	8.26256	5.76253	8.04782	22.5295	18.1861	16.7469	35.4804	34.6433	45.4824	46.384	52.8692	57.6279	65.5994	58.1455	71.492	79.6853	74.6561	90.65	102.017	105.156	123.431	141.685	150.453	167.546	201.693	179.896	201.845	212.061	234.333	266.242	271.304	285.07	317.72	315.435	323.936	302.973	280.894	252.39	240.561	196.863	148.63	121.537
2011-03-20 22:22:35		1.63692	0	0	0	0	7.79446	5.16487	3.8425	11.6251	10.9151	22.8796	18.5406	28.7776	32.8535	37.0651	39.6535	54.5731	51.5833	51.8029	63.7212	60.9462	69.0692	84.3875	84.0452	104.162	112.536	134.299	141.811	161.503	162.78	192.45	196.763	202.666	212.32	252.105	260.346	291.152	292.205	325.513	311.919	314.391	294.621	283.011	262.223	219.032	181.895	141.294	124.993
2011-03-20 22:37:35		0	0	1.3984	0	0	1.1136	4.13196	6.72423	10.7315	9.26244	10.2642	23.0833	27.3918	28.8365	32.7625	49.7821	42.5516	57.5205	46.1462	58.0413	63.2647	68.1125	80.9933	85.6712	99.7401	105.001	115.855	144.95	156.142	174.283	175.749	202.951	203.732	223.898	235.679	268.219	308.219	296.3	314.221	326.795	332.753	300.088	289.038	261.464	220.128	191.076	163.504	122.334
2011-03-20 22:52:35		0.920151	1.51312	0	1.29481	4.79756	1.86621	0.530321	7.00439	7.61875	15.0215	14.1128	22.9317	22.4562	24.5158	40.5266	38.0644	45.5647	55.5253	49.6853	62.549	66.6083	63.9894	63.9702	87.1119	99.3862	121.456	130.599	148.073	151	171.162	181.408	198.65	212.234	224.539	255.723	259.896	303.93	320.433	310.292	343.603	334.212	322.362	286.412	260.711	218.127	185.511	161.699	127.702
2011-03-20 23:07:35		1.63708	0	0	1.29467	1.19936	2.22698	4.13179	7.68545	12.1707	14.5819	17.9289	33.5474	21.1473	37.2679	31.9371	38.6888	45.0939	45.4696	46.1407	59.866	60.9615	66.7452	77.9317	89.5574	96.192	108.77	132.806	137.596	153.127	170.417	193.526	193.788	216.424	241.068	264.159	270.018	328.035	344.151	331.202	355.135	351.647	325.981	306.813	271.529	244.273	190	168.439	119.646
2011-03-20 23:22:35		0	0	0	0	1.1995	2.22716	6.19779	4.80337	5.20006	12.6717	11.3262	18.102	24.8558	34.8192	30.485	32.6679	59.1356	50.6202	57.1939	60.1099	53.5901	65.2141	70.8587	85.0971	94.3631	106.259	132.772	140.074	159.826	158.758	188.902	217.262	222.27	230.839	269.122	284.589	317.244	348.298	353.718	348.529	335.042	319.221	319.088	289.621	233.105	212.949	162.967	112.64
2011-03-20 23:37:35		0	1.51308	0	1.29491	0	1.11358	4.20997	8.57327	6.08426	14.3516	15.135	14.2569	18.4684	35.1301	30.4122	40.6439	48.4115	56.299	50.5776	62.7199	72.5135	65.3138	77.7833	83.4542	97.9067	104.446	128.89	147.368	141.254	178.868	190.094	207.202	224.655	250.477	262.538	288.568	321.413	353.112	366.263	347.474	355.212	341.244	301.707	298.365	240.631	193.65	160.128	130.274
2011-03-20 23:52:35		0	0	0	0	1.19936	1.11346	9.29728	3.84244	7.15433	6.67641	15.2985	18.6041	27.6436	27.3083	32.9234	48.4292	33.4458	52.5176	50.9247	50.5917	62.2564	68.2638	61.2458	79.1292	93.3314	116.42	134.555	148.426	158.079	175.134	173.622	192.779	220.996	239.986	258.317	288.738	330.878	368.369	355.01	359.292	368.212	346.731	304.537	264.335	241.468	204.952	160.737	128.999
2011-03-21 00:07:35		0	0	0	0	0	2.22702	6.1975	8.64542	7.15413	7.51022	17.6757	15.5631	20.8562	25.0423	32.3388	45.4609	42.4285	38.7266	53.6224	58.0926	61.9676	70.1782	68.4285	65.6894	91.6715	112.478	136.521	150.337	151.432	184.928	192.103	202.486	221.787	251.16	275.03	299.201	309.183	333.413	380.244	351.032	376.359	351.359	311.38	251.296	239.972	206.142	165.054	124.245
2011-03-21 00:22:35		0	0	0	0	1.19962	0	4.13253	2.88237	11.399	11.0624	18.4557	13.5286	26.6823	26.0006	34.376	42.0131	33.3202	43.749	41.6628	49.2407	59.433	55.9285	61.8359	80.8115	106.313	97.366	115.645	151.837	158.634	168.656	181.635	208.832	214.439	233.187	294.088	314.696	341.135	379.689	365.622	392.583	369.724	355.747	294.289	273.421	244.866	197.931	155.901	128.311
2011-03-21 00:37:35		0	0	0	1.29499	0	3.34077	5.2342	5.70019	11.6269	11.6847	12.0405	13.2489	21.5197	30.8319	36.741	38.6045	41.5429	44.0763	44.7006	44.3673	52.7968	59.9526	63.1096	78.3734	76.5958	115.116	124.106	143.518	140.727	169.852	174.557	207.46	226.54	275.571	296.292	315.154	367.413	375.619	361.119	372.202	372.814	348.221	309.187	281.889	236.084	210.859	149.662	133.524
2011-03-21 00:52:35		0	0	0	0	0	0	2.06622	3.84337	8.94474	14.189	16.0609	16.1142	26.636	22.741	34.017	27.8882	45.6554	42.6542	42.483	54.6125	60.0292	63.2353	67.2776	65.4699	94.0298	107.335	124.206	134.619	170.022	172.769	183.313	185.849	223.039	241.939	257.979	313.844	358.76	362.696	392.16	394.622	388.183	367.353	337.151	286.819	239.167	201.068	155.897	138.241
2011-03-21 01:07:35		0	0	0	0	0	0	2.12634	6.67054	11.6284	13.3559	15.1906	18.6809	25.1078	27.4235	36.2545	36.0324	41.2583	35.3817	49.5782	57.0798	58.9106	55.6885	70.2032	77.1571	88.2433	100.343	121.264	123.89	143.109	167.793	192.424	208.423	205.631	271.851	289.76	312.901	342.234	362.167	392.821	394.817	383.599	380.606	332.147	289.713	239.495	210.475	164.569	121.146
2011-03-21 01:22:35		1.63742	0	0	0	0	2.22746	1.03321	3.8433	12.2834	11.9096	13.7446	16.9091	23.6819	26.7572	37.2702	44.7151	48.7516	42.5715	48.317	46.3295	60.8897	55.2058	57.7872	75.9455	96.0907	91.2279	140.08	138.259	156.845	153.568	184.866	182.416	232.686	270.833	288.932	315.613	328.554	395.205	403.474	385.958	388.013	362.429	328.122	310.445	253.718	199.147	163.486	122.879
2011-03-21 01:37:35		0	0	1.39852	1.29509	0	0	2.06611	11.5292	2.68329	12.6043	11.1202	16.4363	19.9592	19.6961	25.4243	44.1285	45.0779	53.1779	51.6503	44.2208	62.8673	58.5167	61.4651	71.4612	91.9997	109.525	111.506	130.042	136.611	164.249	188.706	197.402	231.314	246.362	286.132	312.306	332.087	370.859	378.429	419.974	380.173	369.218	319.133	296.238	257.213	193.866	147.099	121.603
2011-03-21 01:52:35		1.6375	0	0	1.29509	1.19958	0	3.0992	10.5685	1.56492	16.0668	10.5283	12.896	16.6648	28.4934	31.9367	34.4881	38.9782	47.1179	46.8106	50.8949	57.3881	60.2756	65.4337	76.358	92.8817	116.228	113.881	123.961	136.721	160.731	167.344	192.729	252.404	246.266	276.691	312.077	343.599	363.433	369.295	376.446	403.224	363.949	334.308	294.016	251.951	191.957	156.667	107.679
2011-03-21 02:07:35		0	0	0	0	0	0	3.09928	2.88249	10.7329	5.8425	12.1159	19.4609	23.2426	23.3388	30.741	31.9367	39.217	44.924	45.5439	49.9907	57.5442	61.8458	64.542	70.3984	83.024	112.437	105.863	124.363	149.547	167.448	173.171	208.165	239.948	255.393	273.123	306.653	342.301	360.465	408.689	388.849	370.337	375.535	327.699	288.505	249.599	208.257	158.213	126.266
2011-03-21 02:22:35		1.63738	0	0	0	0	6.6825	2.11473	6.12266	13.7154	16.9479	19.717	14.6262	28.467	28.3916	32.9881	45.617	47.1522	41.6756	46.6657	56.7529	51.4385	61.3154	64.3747	82.6212	78.9093	121.655	134.399	126.558	149.533	166.476	181.468	193.025	212.001	242.949	271.11	287.163	324.91	362.538	366.029	423.369	373.76	357.763	329.266	277.053	233.562	190.042	157.909	126.895
2011-03-21 02:37:35		1.6375	3.02744	0	0	0	1.11374	3.0997	5.76532	7.15625	13.3551	12.2093	10.3026	25.5521	28.1773	23.3482	33.1545	43.5712	48.3699	45.2955	50.9564	52.8295	71.1862	67.1487	67.6721	97.7596	114.206	123.56	138.996	160.733	162.736	160.469	197.005	233.147	204.962	264.848	291.32	329.554	367.298	383.365	384.859	365.869	365.821	331.375	288.151	241.649	209.327	173.081	119.539
2011-03-21 02:52:35		0	0	0	0	0	2.22729	5.16545	4.80369	16.0993	14.2409	10.4946	17.5799	20.5071	23.5701	36.5234	33.0821	45.0599	46.4192	46.1487	43.5061	55.3256	64.2529	74.0696	81.309	86.9766	100.461	121.366	124.537	152.113	174.359	188.6	196.783	224.056	254.061	266.851	300.861	340.282	347.321	385.359	387.779	385.609	373.471	334.266	295.142	229.565	200.947	160.673	135.597
2011-03-21 03:07:35		0	0	0	0	1.43333	3.12402	5.16535	9.60718	3.57772	11.6846	12.6936	19.1068	26.0253	31.9553	24.9505	49.8875	40.0298	38.6487	49.8885	48.3615	56.1103	52.6657	60.9125	77.6596	88.1917	104.624	114.075	135.467	146.803	163.127	182.8	175.87	211.428	249.794	284.824	310.202	343.856	342.946	387.231	358.897	357.974	363.224	330.824	297.242	243.782	202.484	167.179	139.858
2011-03-21 03:22:35		0	0	2.79668	0	1.19936	3.34067	6.19772	5.76349	7.15455	10.8487	11.2493	22.014	19.971	21.0356	22.4886	39.5196	41.4564	52.9718	52.6173	53.125	52.9484	56.2529	59.0651	76.3551	85.5205	107.452	120.012	123.009	119.688	160.186	198.053	188.412	209.603	243.436	260.493	285.381	294.291	367.881	384.865	381.59	391.151	378.721	347.974	298.826	249.423	212.023	149.607	120.248
2011-03-21 03:37:35		0	0	1.39828	2.58962	1.19942	4.05292	5.53721	6.72449	6.26026	15.022	18.1939	13.6733	27.3433	30.2001	25.0753	45.9494	37.6484	45.6449	45.3311	49.6532	54.4141	66.2542	57.3144	75.508	92.8064	105.581	118.172	137.536	144.968	162.766	182.612	180.388	232.47	246.801	285.076	299.329	315.078	363.644	360.5	375.288	371.798	345.115	309.639	275.212	239.573	182.422	144.96	138.838
2011-03-21 03:52:35		0	0	0	0	0	4.45388	6.19792	2.88201	7.15439	12.5187	12.8142	14.4245	22.8544	23.8746	28.0298	39.0436	35.0221	51.5612	42.7119	52.584	52.8058	65.9788	68.241	68.9843	88.5494	108.992	112.627	128.922	149.932	160.643	163.394	209.776	197.33	238.544	251.889	307.8	306.635	343.074	356.901	360.824	352.753	363.875	349.571	296.839	261.588	185.771	173.996	122.099
2011-03-21 04:07:35		0	1.513	0	1.29469	2.39882	2.22702	4.13237	2.88187	13.4151	13.3524	7.75708	14.6911	19.1242	23.6021	31.0096	45.3679	36.967	44.5192	43.925	47.9801	39.6596	64.8875	59.5554	77.5372	76.4266	97.5798	118.309	143.303	148.764	156.186	195.543	189.902	204.932	242.762	261.008	282.554	332.622	347.218	398.353	374.756	373.946	347.314	310.208	276.032	251.424	197.638	155.383	125.637
2011-03-21 04:22:35		0	0	0	0	0	1.11354	5.16471	4.80346	11.4223	9.37032	13.7145	21.6551	23.6527	29.5917	27.2194	28.3436	39.9051	45.7606	45.3651	45.9292	57.5907	52.9721	71.3481	73.7667	87.5651	93.2686	128.564	138.298	135.09	156.551	174.778	182.84	199.671	240.016	260.581	301.683	330.516	357.609	362.619	373.304	373.378	354.272	302.173	296.12	239.764	195.733	163.229	120.739
2011-03-21 04:37:35		0	0	0	1.29499	1.1994	3.34067	1.03309	5.22535	9.44487	12.6583	9.65603	14.694	24.6967	28.1975	28.0144	30.9846	39.884	39.3487	45.7692	42.7558	50.9359	57.8282	73.5958	79.0901	93.2545	101.619	124.427	129.635	130.875	158.752	166.953	186.575	212.704	240.635	264.814	270.327	303.429	335.615	359.192	378.91	369.01	352.654	307.013	275.192	250.088	191.955	154.94	123.301
2011-03-21 04:52:35		0	0	1.3983	0	1.1995	1.11362	6.1983	7.68548	9.83782	6.67641	14.3126	19.7023	22.3235	22.0076	32.3465	44.5167	39.5622	45.2208	47.7269	49.0849	50.892	56.8481	63.6872	76.0106	88.7183	98.3651	103.393	128.892	122.141	148.159	166.571	180.563	200.21	245.797	249.491	290.29	299.854	339.221	331.452	345.234	371.163	334.923	305.258	260.92	229.135	193.878	154.81	123.009
2011-03-21 05:07:35		0	0	0	0	0	0	4.13244	3.31167	8.32692	12.7217	11.3184	10.46	17.3628	25.605	32.4827	33.5321	32.7295	45.2772	48.549	39.5381	55.3843	49.5186	59.2077	75.6266	81.5984	89.7144	111.548	139.62	145.587	148.223	164.327	202.159	201.977	226.529	271.106	283.001	308.291	322.853	349.933	357.843	362.34	335.141	309.359	275.349	217.454	196.653	165.949	120.701
2011-03-21 05:22:35		1.63714	0	0	0	0	1.11372	4.13234	0.960776	7.15551	15.0738	17.6564	20.4365	20.8047	26.5221	32.7208	39.0526	35.9292	44.65	46.417	45.6885	51.2365	57.4083	71.6288	78.1946	78.4833	99.1035	99.3048	119.656	131.749	153.462	185.791	210.433	210.855	219.353	254.223	276.913	301.184	313.744	346.744	357.84	345.638	325.625	316.14	252.274	231.076	189.087	154.455	121.548
2011-03-21 05:37:35		0	0	0	0	0	4.45506	5.1658	6.72545	6.92423	11.9468	11.3577	22.8748	28.3479	40.2279	34.5317	44.9458	40.5067	48.9615	49.8939	44.4846	64.1013	61.1782	68.7013	83.0548	96.3337	103.202	123.404	145.401	153.612	172.047	186.048	230.665	226.196	249.119	282.879	316.55	331.465	324.439	396.365	367.42	355.458	335.077	311.679	293.405	230.393	198.8	156.863	133.329
2011-03-21 05:52:35		1.63746	0	0	1.29515	0	5.56913	9.29853	12.4909	10.7335	18.3799	25.015	39.15	32.3962	47.0939	55.1423	62.4083	67.1692	68.8949	61.8321	71.6824	63.7551	82.449	103.714	114.974	122.479	140.815	144.721	156.51	187.023	197.414	216.328	234.263	256.659	281.476	295.525	323.635	350.077	330.446	364.827	363.731	355.705	365.109	332.038	282.877	232.666	184.866	154.048	127.274
2011-03-21 16:22:35		0	0	0	2.58968	2.39886	2.95841	5.51933	7.68516	4.28385	14.4396	16.9479	18.2181	27.9427	23.5877	29.4215	35.1042	34.2343	32.6103	44.0218	26.4011	35.2753	37.2522	46.5394	53.0269	61.8064	81.4006	100.825	121.386	114.219	140.643	175.994	201.066	206.296	198.72	229.193	260.737	250.415	252.065	285.004	325.391	311.963	288.684	262.602	244.764	208.59	173.96	129.696	107.285
2011-03-21 16:37:35		0	0	1.39834	0	0	5.56782	5.24913	7.60683	12.5204	10.8492	12.8158	14.0491	24.346	31.7081	30.8946	38.8798	36.6689	40.6856	35.4763	31.4928	41.9202	40.3362	47.9737	59.0821	67.2288	86.609	104.021	102.039	129.445	133.466	173.976	187.582	216.883	226.675	235.637	253.315	279.133	279.832	271.414	285.807	309.511	295.05	270.377	263.359	201.26	166.102	145.221	112.991
2011-03-21 16:52:35		0	0	0	0	1.19932	3.34096	5.1651	4.8034	8.04917	12.7137	17.4028	13.9107	20.1501	18.2766	33.5292	30.7151	46.3311	43.4516	42.4571	43.3705	35.8744	39.2609	54.7221	47.6897	66.2663	66.159	92.5981	109.631	132.173	148.057	148.932	197.099	193.489	210.271	224.253	246.206	277.276	283.139	311.651	302.961	297.506	307.39	274.235	231.803	220.867	178.484	131.316	124.299
2011-03-21 17:07:35		0	0	1.3984	0	2.39904	4.45413	6.19811	11.528	11.626	16.7477	17.9123	18.7389	25.5745	34.4801	31.4663	40.3622	31.7961	37.9702	45.2349	37.6426	46.5596	34.5221	52.3606	62.1183	54.5696	64.8952	95.2785	113.421	119.403	153.338	171.04	184.654	220.701	226.408	224.599	226.845	261.807	285.952	284.529	289.644	303.652	278.025	260.443	234.838	220.947	183.121	129.744	107.203
2011-03-21 17:22:35		0	0	0	0	0	2.22716	5.25369	4.72045	5.36599	12.6649	14.9871	14.0022	15.1031	21.0629	25.3089	41.5311	39.8154	35.4458	39.4304	43.8106	34.9965	36.5087	41.45	51.8869	57.325	83.1061	105.01	106.789	132.745	166.813	189.327	199.615	187.071	225.823	230.519	235.563	258.876	272.135	291.813	295.387	302.664	292.776	270.633	241.286	224.191	188.878	132.248	108.095
2011-03-21 17:37:35		1.63702	0	0	1.29485	3.59798	5.56724	1.03301	7.20388	8.31343	11.8524	15.9499	19.4425	18.6444	20.3335	33.9853	37.4067	41.5824	35.026	37.0599	35.9603	32.7279	33.8135	51.0583	40.8679	61.2731	83.0269	117.975	114.089	131.957	152.664	182.121	169.099	210.427	215.637	234.443	232.708	270.615	300.06	324.077	309.375	309.888	319.612	286.168	243.381	203.852	169.241	133.918	110.055
2011-03-21 17:52:35		3.27369	0	0	0	1.19942	5.56712	2.06579	7.68436	15.2018	15.9536	19.8118	14.3908	23.3121	22.2332	28.212	32.358	40.3837	40.8808	37.676	39.5446	37.0574	34.0603	39.4308	55.3061	63.7776	79.3465	104.017	111.124	146.989	153.628	161.869	174.189	210.685	217.095	223.069	256.995	266.583	297.688	298.471	309.792	309.267	304.968	299.271	231.508	223.964	163.355	148.479	125.896
2011-03-21 18:07:35		1.63688	0	0	0	0	2.22702	4.21859	8.56452	6.97497	8.68099	15.8872	15.6998	26.0581	31.6671	33.9641	29.0158	26.1951	33.0051	38.0058	37.3471	35.691	35.1792	44.3744	54.6567	68.5301	65.7535	103.825	95.5112	125.725	142.949	166.538	200.208	196.815	207.304	256.264	267.51	258.814	283.349	296.056	342.804	329.692	302.953	276.44	246.927	225.904	168.802	128.067	123.464
2011-03-21 18:22:35		0	0	0	0	0	3.34032	2.06571	5.76356	6.25958	6.7901	17.5523	23.1588	20.521	24.3694	33.2353	48.8183	44.3074	39.1061	46.0058	36.0061	31.5713	39.5929	40.4128	50.551	67.2417	81.3449	103.324	123.548	141.364	154.734	173.532	196.172	218.562	221.188	233.455	231.647	258.333	287.67	317.362	314.794	306.262	311.58	288.253	255.597	202.25	176.885	144.892	109.578
2011-03-21 18:37:35		1.63664	0	0	0	0	1.11334	3.09862	7.68449	14.9234	12.7753	12.3379	17.7606	18.4992	29.3211	32.5375	37.7487	41.3433	41.8452	35.0372	45.6936	45.3692	46.0221	40.3292	54.8612	64.9436	74.2724	99.8766	116.063	126.675	149.179	182.895	183.76	209.684	224.275	210.946	248.772	247.392	296.096	295.897	317.776	315.819	304.662	283.097	273.952	210.988	178.139	151.697	110.367
2011-03-21 18:52:35		0	0	0	0	3.59769	3.34032	2.06572	5.76292	7.91413	12.6406	14.4266	17.0077	24.836	23.3245	36.2202	34.1253	33.9115	28.6134	30.8446	34.0218	40.6205	43.3128	46.9849	40.6965	67.384	77.9231	108.29	110.466	131.521	147.472	174.445	191.014	201.777	239.054	228.402	246.274	252.306	284.104	303.137	311.53	325.593	296.803	296.487	258.259	213.702	174.495	149.229	110.533
2011-03-21 19:07:35		1.63688	1.51312	0	0	2.39866	0	5.16452	7.68442	5.36535	10.0138	10.463	20.9515	21.6066	25.6639	33.6304	40.05	39.7333	45.8407	39.5526	33.6205	45.1583	41.1375	51.1497	56.1183	66.6112	87.3369	100.013	92.1353	139.343	147.901	194.804	178.404	210.579	220.21	233.708	242.83	250.699	272.947	287.001	322.292	304.375	287.502	271.368	257.486	223.193	166.831	140.487	111.267
2011-03-21 19:22:35		0	0	1.39814	0	1.19926	1.11336	3.32321	8.43583	1.78842	13.4522	15.9318	15.4615	24.1561	24.1967	31.5715	30.5565	39.9843	40.0141	45.8474	35.767	56.0545	50.8692	45.6192	60.1292	72.7253	78.3199	102.392	110.439	136.066	152.983	160.693	182.396	178.91	227.005	232.538	239.187	238.009	280.861	293.998	303.528	288.407	299.646	299.029	258.035	207.865	172.915	148.017	102.565
2011-03-21 19:37:35		0	0	0	0	1.19932	0	3.09884	6.72381	10.5971	10.1378	6.72647	11.8157	18.092	20.7301	34.0394	49.3913	47.7474	40.0894	45.9099	50.2465	41.2561	46.8513	61.2471	66.0183	75.7394	110.263	113.262	120.162	140.346	145.497	172.885	184.667	199.579	186.021	229.523	253.948	261.799	267.069	293.87	313.365	309.96	291.272	279.573	248.069	214.647	169.577	136.789	107.614
2011-03-21 19:52:35		0	0	0	0	1.19944	1.11362	4.13196	4.80321	1.78858	12.5184	15.9917	16.0921	20.2506	23.784	25.3473	33.8179	46.8503	45.867	48.9308	47.3721	47.7603	53.2417	64.1468	67.4321	79.0551	85.5478	103.87	118.816	143.225	153.658	169.035	170.306	206.512	207.79	226.991	253.043	265.703	282.939	306.412	305.303	293.542	288.73	286.929	238.544	223.111	187.846	135.412	121.805
2011-03-21 20:07:35		0	0	0	0	1.44253	3.11492	9.29737	3.84256	6.26029	14.2358	17.4551	16.1034	23.1408	31.0695	37.1179	38.2599	45.941	54.4651	53.7247	54.2846	48.8423	49.4051	52.3378	79.2205	78.3272	95.6221	105.208	126.819	135.859	138.399	174.443	197.698	202.372	236.521	235.525	266.268	242.929	261.615	284.445	288.446	309.555	289.056	285.663	260.407	227.967	186.545	145.737	113.031
2011-03-21 20:22:35		0	1.51334	0	2.58986	2.39916	8.90859	3.0992	8.64587	14.3096	15.8572	10.4639	22.2746	31.0459	31.1304	37.9955	40.1199	44.2606	48.1071	48.8949	50.2904	44.5801	49.3994	58.875	68.3151	73.0686	94.5837	101.208	123.5	151.037	160.363	198.556	171.448	220.775	224.894	229.828	241.398	279.429	286.478	327.596	304.916	322.708	313.313	282.37	249.051	216.999	172.917	129.203	100.925
2011-03-21 20:37:35		1.63726	0	0	1.29507	3.59865	3.34067	4.13221	7.68571	5.17929	10.1892	15.5405	33.1939	29.2915	29.8025	34.5529	42.1696	46.7715	47.8542	42.8705	45.0077	54.899	51.7314	45.3487	65.7583	60.7038	93.4103	109.77	118.231	140.533	167.895	188.141	196.739	223.614	241.524	259.607	261.456	273.167	276.775	305.92	305.411	322.744	305.393	296.831	251.312	209.327	165.859	142.57	116.946
2011-03-21 20:52:35		1.63698	0	1.39828	0	2.39882	3.34054	5.1651	3.84244	9.83792	10.0143	15.2182	18.1765	33.5535	31.2234	45.692	51.8689	40.1083	49.6837	55.3833	44.6077	44.7288	60.15	60.4019	59.526	75.4144	93.1609	108.088	133.297	133.347	149.798	184.229	205.569	230.062	242.57	241.008	290.166	281.178	281.154	303.944	323.724	314.956	310.419	277.816	255.419	227.52	175.639	139.203	111.52
2011-03-21 21:07:35		0.920093	0	0	0	3.59804	4.45372	3.09882	7.68426	2.68267	7.51032	13.0686	19.8004	34.751	28.3434	42.0776	40.9112	50.2635	52.7814	43.0981	50.0788	52.8087	47.5426	57.875	62.1407	76.8189	94.4468	114.251	122.52	134.964	176.781	176.494	199.155	214.788	232.819	254.998	250.633	290.703	301.294	311.136	338.385	313.075	308.952	286.37	263.544	228.113	194.888	138.77	112.165
2011-03-21 21:22:35		0	0	0	1.29463	2.39852	1.11334	3.09892	2.88165	12.3769	11.1947	19.0012	22.3642	31.1342	36.0407	39.2606	49.8087	49.0442	44.1535	43.9971	42.3417	41.3833	54.9314	60.3327	63.9846	88.6125	104.376	118.809	123.104	148.387	168.88	185.605	191.138	220.555	230.469	256.961	279.249	306.521	317.215	323.654	347.788	314.329	329.138	289.565	261.134	235.277	193.155	149.098	112.041
2011-03-21 21:37:35		1.6369	0	0	1.29467	2.39844	2.22676	7.23003	9.60538	12.5185	17.5234	18.7991	20.5337	27.5753	34.1074	46.4494	43.9737	54.5936	51.8506	51.5974	54.0112	45.2734	57.3859	49.0583	68.591	76.5538	94.2782	113.061	120.427	133.199	166.891	186.42	220.317	216.088	249.377	250.735	265.308	273.996	288.155	338.862	314.694	333.465	314.327	288.964	266.931	231.767	177.32	152.428	116.296
2011-03-21 21:52:35		0	0	0	1.29489	2.39868	5.56699	4.13215	4.8026	9.83692	17.5233	18.3175	22.0883	23.4662	32.5199	29.1661	48.2154	34.9859	53.7321	56.0923	46.2683	49.3308	50.941	60.6362	63.0968	89.934	88.3721	100.202	118.546	135.429	165.052	183.688	198.191	229.675	235.022	253.932	268.095	316.689	294.257	331.785	319.776	324.276	325.91	288.059	256.683	212.231	181.104	132.476	115.597
2011-03-21 22:07:35		1.6367	0	0	2.58979	3.59817	0	2.06587	3.84247	11.6257	16.6909	21.6014	23.8834	33.6631	28.2019	37.7189	40.9051	51.2401	53.6391	56.0811	60.9926	48.066	61.5141	61.617	66.7359	75.7712	92.5554	111.631	110.564	135.309	153.001	168.023	182.354	214.715	247.213	248.506	270.793	307.895	318.51	328.894	320.212	312.069	326.317	289.581	268.53	221.024	168.85	152.879	123.9
2011-03-21 23:22:35		0	0	0	0	0	4.45192	5.16263	5.76125	8.04468	6.03311	18.0653	18.9507	27.7143	33.8663	52.8288	40.4712	50.2237	47.6231	57.5798	53.6798	64.8465	49.3587	61.2673	66.7426	70.9423	94.3766	107.213	122.83	147.057	168.638	171.889	195.817	213.386	206.855	246.164	261.426	270.92	298.696	296.212	315.381	330.237	299.235	295.178	254.008	220.627	195.365	154.806	129.804
2011-03-23 16:52:35		0	0	0	0	4.78679	4.4441	3.09219	4.79244	11.0318	10.9022	12.4971	20.2514	24.9159	27.7067	32.2016	33.0397	58.6821	57.5429	60.4394	61.0215	66.3452	67.624	69.2865	76.0869	77.3955	94.4897	96.4519	102.945	99.4837	113.469	112.443	117.194	138.125	138.928	131.212	152.013	172.095	189.85	170.433	192.76	178.373	168.688	153.714	128.708	105.148	75.5875	82.1654	63.8929
2011-03-23 17:37:35		0	0	0	1.29213	0	3.33327	4.12301	11.4767	12.5163	18.3193	21.1681	24.8241	23.2591	35.9724	44.4179	54.4218	55.2683	64.9	62.4785	79.517	83.7135	80.7571	88.6721	106.743	109.487	111.76	118.239	117.747	107.946	113.021	132.564	126.394	136.973	155.459	165.929	179.912	205.006	175.327	171.358	174.08	186.36	148.163	135.875	129.519	112.451	89.2683	75.5029	72.5824
2011-03-23 21:37:35		0	0	0	1.29313	7.18657	11.1193	23.0575	25.1307	24.6514	43.184	61.9311	50.3955	83.8442	87.4821	93.6942	87.0077	96.4635	115.617	105.12	118.113	155.244	158.462	168.029	193.554	191.53	209.367	189.671	193.265	186.957	198.698	208.061	234.127	242.332	286.643	301.408	326.045	305.345	328.776	308.179	333.567	302.123	272.462	258.439	208.143	207.296	160.653	124.505	120.162
2011-03-23 21:52:35		3.27006	0	1.39647	3.87949	2.39643	11.1216	12.3804	16.3101	22.33	45.0083	68.0349	73.1343	86.5282	88.3131	84.5327	93.6904	123.89	128.387	148.083	148.439	137.817	166.018	175.407	177.785	198.486	193.221	193.758	187.494	197.079	189.956	227.073	230.198	254.916	291.074	321.849	323.436	325.051	336.926	333.359	329.433	319.465	299.92	256.604	239.265	203.017	171.795	145.631	132.406
2011-03-23 22:07:35		1.63528	0	1.7867	3.5192	8.38708	9.8426	18.01	23.6981	46.4522	42.8705	55.7686	63.8776	74.8647	78.5997	101.613	112.643	113.504	113.573	124.473	126.326	154.581	171.743	183.936	173.255	191.821	187.262	194.639	179.954	178.954	193.72	203.516	219.752	256.875	276.004	315.982	324.045	339.112	313.674	356.567	323.314	301.606	278.219	253.147	239.012	196.859	149.644	133.706	125.986
2011-03-23 22:22:35		3.27045	3.0229	0	2.58686	2.39613	5.41647	11.4845	21.7953	34.433	43.7862	44.4221	45.1878	56.5292	63.0391	85.8667	78.7728	94.8423	98.5013	105.55	133.542	136.18	135.573	172.951	156.803	168.964	167.853	165.567	161.471	166.188	188.387	184.792	226.655	219.755	253.109	265.19	286.989	306.495	307.344	318.686	319.441	288.331	281.118	231.779	220.092	189.004	150.098	121.887	112.937
2011-03-23 22:37:35		0	0	1.39679	2.58714	3.59465	12.2366	11.3514	15.3541	32.2253	55.0788	58.6724	62.4054	73.8583	83.2083	92.0875	99.2372	114.406	120.869	117.39	154.814	134.227	157.364	159.255	162.885	166.356	192.708	170.296	180.13	178.233	173.514	225.012	215.254	242.851	264.385	278.568	311.044	316.013	342.115	355.106	319.974	330.035	298.614	254.697	214.497	173.338	151.633	131.474	112.442
2011-03-25 19:07:35		0	0	0	0	2.39531	3.33571	7.2199	4.79609	8.31814	18.1133	25.1749	29.0607	42.2542	56.8609	64.6083	79.1846	77.2125	83.5144	68.7974	79.7737	86.3013	75.4542	87.517	81.1724	100.276	113.914	132.231	145.699	157.919	178.848	212.366	251.604	274.022	308.78	350.301	339.192	366.439	347.712	369.083	332.138	324.183	296.15	260.425	221.4	186.17	143.139	111.546	106.923
2011-03-25 19:37:35		1.6342	0	1.39597	1.29265	0	5.51067	1.07578	13.2731	15.0552	12.8444	33.0404	28.2171	49.4638	72.4327	64.5292	75.3497	87.2356	88.4205	91.2609	78.1824	88.7571	93.3407	88.4715	94.7026	112.023	106.482	127.724	134.922	143.439	187.528	237.242	259.868	294.914	349.019	340.974	368.849	357.433	348.516	341.744	343.772	321.452	276.242	274.96	241.504	194.766	157.352	121.366	90.7304
2011-03-25 19:52:35		0	0	1.39569	1.17811	0.106098	3.31446	3.1122	6.71244	11.8438	14.7716	24.9064	28.894	51.1199	46.301	43.9449	59.4022	72.3506	86.5135	81.5702	90.6199	90.733	84.8298	97.5904	111.04	113.47	117.876	133.189	160.527	172.17	195.921	218.013	276.208	297.506	331.91	340.16	347.042	385.689	381.958	376.356	354.151	331.183	296.286	252.907	226.288	195.353	147.724	127.732	95.0506
2011-03-25 20:07:35		1.63413	1.51054	0	1.29239	0	3.33474	3.09327	15.3426	16.0683	18.8331	26.5873	38.4756	52.2811	59.767	61.5821	75.449	78.2282	75.0878	90.6087	87.6503	88.0596	92.8128	96.9478	115.545	105.577	126.871	117.381	138.325	176.444	183.265	257.168	263.133	312.594	325.679	344.734	367.801	354.663	366.619	375.647	351.458	330.66	302.861	272.7	223.187	184.201	158.96	141.328	105.95
2011-03-25 20:22:35		1.63397	0	1.39589	1.29247	1.19716	2.22296	2.06206	9.58856	13.3896	22.9715	27.364	31.2176	47.5221	61.4561	54.0019	69.6788	73.7074	88.9128	94.9577	80.2785	80.9881	91.5644	96.4468	105.825	110.481	127.985	136.212	143.385	182.434	204.211	229.249	276.41	324.942	343.144	346.455	377.413	388.452	374.978	358.58	351.196	350.244	281.741	252.923	248.802	186.603	164.513	115.371	86.1798
2011-03-25 20:37:35		0	0	0	1.29243	2.39443	0	3.09313	4.79388	9.81875	29.9854	23.0258	27.3692	44.7301	49.184	70.475	85.8917	91.8465	106.529	92.3359	81.6788	88.8234	81.6962	82.5317	90.6061	104.96	135.815	144.966	144.577	183.546	208.363	222.322	294.926	284.782	338.542	362.679	372.718	372.17	364.869	359.484	352.75	335.244	299.409	286.937	244.429	192.408	151.13	130.525	101.148
2011-03-25 20:52:35		0	0	0	0	1.1971	0	3.59202	6.24721	16.3123	11.4317	23.2961	32.4138	46.9625	61.6247	65.7894	73.3506	73.3433	87.1349	87.0747	85.9522	73.5077	98.5814	96.8497	94.8955	106.388	111.333	146.747	147.4	196.815	189.581	219.808	276.761	293.906	312.472	345.942	372.849	376.401	386.619	360.622	359.635	316.282	292.888	278.604	235.938	188.83	162.861	131.611	99.2554
2011-03-25 21:07:35		0	0	0	0	0	2.21685	4.1292	5.67571	13.4588	14.678	28.0753	32.3343	42.0288	53.6689	65.5077	84.8349	81.6683	94.2795	74.5471	89.4599	98.5705	86.1641	99.5468	102.839	103.425	114.802	130.703	150.525	167.011	191.194	236.721	255.353	281.895	312.434	344.042	349.76	368.163	357.359	370.362	344.497	344.25	287.474	274.03	237.646	183.047	148.375	114.525	102.454
2011-03-25 21:22:35		0	1.51005	0	2.58439	0	4.44506	8.24721	9.58657	15.1721	13.8852	29.0849	34.5917	41.5712	64.4163	61.9561	65.2519	83.2314	88.1449	88.1276	95.591	89.8987	87.8683	98.8083	84.8513	106.31	113.633	125.311	142.36	151.751	192.28	230.757	260.172	296.891	322.949	348.699	334.657	349.333	350.176	346.147	339.179	320.651	297.54	268.369	213.86	184.567	168.732	114.232	102.563
2011-03-25 21:37:35		0	1.50986	0	0	2.39387	4.44452	6.18497	4.79279	10.7082	15.8216	26.3616	37.8862	44.858	54.8545	67.9372	73.6891	80.0067	94.4103	83.7641	84.8051	70.7465	85.5692	95.3824	89.2071	97.4542	115.372	141.142	143.93	161.538	181.384	205.529	258.035	275.986	313.684	335.404	362.237	345.077	328.99	340.173	321.298	293.089	282.476	257.242	228.882	170.982	143.327	117.951	91.7071
2011-03-25 21:52:35		1.63345	0	1.39525	0	0	2.22234	3.09229	1.91715	8.92388	18.6235	24.627	27.4641	38.7824	52.8064	70.8381	67.6891	84.292	82.1494	83.7856	89.8615	80.3862	78.5346	88.6737	87.2324	86.9058	123.9	122.774	133.506	137.398	162.684	197.666	225.062	250.841	307.829	308.995	305.102	303.7	313.187	305.751	299.898	266.35	259.806	273.101	219.744	172.736	161.476	115.572	91.7385
2011-03-25 22:07:35		1.63331	0	0	0	0	0.0344532	7.26849	11.4226	20.2372	19.1543	25.1939	27.5491	48.759	48.1167	62.0465	65.5788	79.7798	85.5535	73.4926	81.2651	74.6346	78.9747	82.2519	90.1679	92.3913	96.076	110.257	138.768	143.436	168.215	176.867	199.08	218.676	251.394	290.96	298.656	290.435	294.646	281.556	302.231	255.405	261.474	227.111	191.54	172.674	147.558	123.291	89.2696
2011-03-25 22:22:35		0	0	0	0	3.59058	1.11114	3.09213	4.74016	7.18801	14.7466	16.5154	34.324	46.7103	41.1551	53.8731	71.0692	77.4308	81.0712	82.6401	78.2151	71.0317	84.6484	66.9462	81.1218	96.3247	89.2785	107.045	130.29	130.069	141.891	161.757	202.526	210.14	235.767	261.715	282.125	286.899	271.068	277.756	271.967	262.8	228.321	214.655	195.755	161.975	128.157	104.044	85.8157
2011-03-25 22:37:35		0	0	0	0	3.59	1.11114	3.09193	2.8754	8.92266	12.2785	22.8181	26.5817	40.9724	37.8247	58.7673	64.6926	72.2304	77.1728	81.3074	78.7699	73.8606	85.0298	80.667	66.5173	79.1968	94.608	108.798	119.84	145.803	160.353	163.363	193.82	214.657	251.35	262.787	263.033	283.159	277.29	273.077	284.473	255.162	245.767	211.412	189.601	179.255	129.699	96.6196	93.8228
2011-03-25 22:52:35		1.63335	0	0	0	1.19662	0	7.79324	7.12965	9.81484	13.1166	13.5975	25.6312	44.0487	43.6413	51.484	58.2737	73.0756	70.7234	76.5532	78.683	77.501	73.5359	83.1721	80.9551	91.2311	97.6526	117.78	112.842	134.744	150.661	164.163	214.393	226.562	253.213	274.86	284.499	284.882	289.287	286.735	266.49	261.064	249.928	224.367	203.962	176.901	119.214	120.449	79.8244
2011-03-25 23:07:35		0	0	0	0	0	4.44337	2.061	10.5417	5.35317	18.1148	29.8055	34.1471	42.2109	46.6872	66.7571	72.4282	76.2859	79.6109	78.3433	84.7679	75.6196	72.0526	75.6821	71.8516	91.1981	90.0173	111.953	116.404	129.022	167.861	183.556	226.503	231.582	264.443	281.166	289.573	289.457	277.165	287.384	283.145	242.73	244.533	243.003	196.132	154.673	142.753	101.739	83.3503
2011-03-25 23:22:35		1.63303	0	0	0	0	0	2.061	7.66663	11.5981	20.8129	20.2853	33.3048	39.0628	38.9276	62.5397	63.4224	75.15	75.4734	80.0327	88.7215	76.3147	71.1439	74.4747	72.7638	94.9801	104.774	125.11	136.657	146.202	152.903	198.277	230.907	232.896	279.499	299.163	278.686	288.429	291.068	286.426	301.611	285.918	247.979	245.515	223.447	175.449	129.146	106.793	78.4532
2011-03-25 23:37:35		0	1.50936	0	0	0	1.11098	5.15183	8.62436	8.92135	12.3	18.2466	32.0644	42.2356	45.0545	55.1753	73.4333	80.4256	83.2429	83.4426	84.5494	75.4654	79.2391	83.9038	94.8429	88.9404	98.4112	121.89	136.747	150.441	166.24	189.729	236.266	249.091	276.879	296.168	309.117	319.022	297.352	304.654	301.376	281.41	263.113	227.274	199.585	175.889	142.861	121.42	91.6119
2011-03-25 23:52:35		0	1.50949	0	1.29167	1.19654	0.0982593	3.0002	10.5414	10.7051	15.8174	21.0753	35.5369	47.9449	57.2439	54.4218	71.6965	83.2218	81.6689	86.9109	86.7494	84.0061	83.0234	77.7064	89.8051	96.7837	113.087	119.341	132.015	154.327	173.153	202.923	222.342	267.638	294.223	306.456	289.657	328.532	335.638	310.236	315.485	303.097	283.68	246.825	219.349	181.593	148.498	110.503	93.1247
2011-03-26 00:07:35		0	0	0	0	0	1.1107	3.70179	12.8467	12.3929	18.2334	16.4808	19.5847	42.8519	62.0439	67.4301	69.7513	67.6609	94.2394	83.1199	81.5131	70.1891	77.6785	81.3122	91.7955	95.1708	95.3663	126.929	133.47	144.762	174.734	198.261	236.727	244.9	298.479	307.28	343.763	307.392	328.221	327.183	304.96	280.97	272.702	261.17	214.79	186.484	149.571	127.033	96.8974
2011-03-26 00:22:35		0	0	0	1.29169	2.39299	0	5.1517	5.83016	11.9296	15.13	21.5375	30.8031	41.3724	64.3538	61.4391	68.1737	86.6875	81.0061	93.8032	81.1292	82.9788	85.5571	79.5542	87.9929	94.4462	98.0397	133.335	154.691	170.973	178.532	217.602	231.106	262.694	301.308	335.106	338.913	364.811	346.051	317.843	322.776	302.079	274.285	256.532	227.041	188.407	160.747	115.762	97.9532
2011-03-26 01:07:35		0	0	0	1.29127	0	2.22109	5.78413	6.1174	10.7023	14.7556	19.9784	27.0894	38.2208	61.8712	69.8901	63.2202	70.5247	84.6663	84.5548	83.659	79.6003	81.4321	74.9462	87.841	87.8756	105.11	131.24	142.107	147.444	157.388	181.621	221.955	260.715	277.44	309.623	307.997	309.083	302.546	295.531	305.008	290.713	266.328	239.213	213.309	180.859	158.207	120.909	103.362
2011-03-26 01:22:35		1.63259	0	0	0	0	0	4.12038	3.93192	7.93346	12.483	21.7414	34.1202	33.7785	51.8215	57.6811	71.3904	67.2997	83.4131	80.6974	80.4763	81.3446	89.067	73.9103	79.3654	87.5628	101.009	101.275	120.925	123.691	141.17	191.362	207.271	230.411	296.256	287.356	284.051	284.675	282.027	296.965	301.338	284.507	245.939	244.157	194.13	173.868	124.531	123.654	83.6394
2011-03-26 01:37:35		0	0	0	0	0	2.22097	3.78343	3.18716	8.91788	18.1903	21.1916	35.3587	44.2728	46.0875	53.2689	72.1907	84.2449	74.3772	73.7955	86.0183	75.5067	74.2272	80.033	100.819	99.4798	113.603	126.056	132.616	150.028	164.724	204.667	215.337	276.48	288.864	339.747	320.066	341.199	352.615	339.394	320.587	300.541	274.185	251.561	210.092	174.715	137.258	126.46	101.47
2011-03-26 01:52:35		0	0	0	1.29125	2.39199	4.44147	6.18054	5.74753	9.80942	19.972	28.7959	38.4346	45.7301	46.7433	58.8606	66.2362	79.451	85.6965	89.2295	76.7026	72.7471	68.7154	74.0474	78.5301	93.0035	92.3179	113.988	150.623	153.067	171.412	202.746	238.548	286.388	317.945	372.647	386.875	378.465	397.683	371.545	341.048	334.792	302.346	266.04	225.481	197.961	161.474	118.536	109.397
2011-03-26 02:07:35		0	1.50877	0	0	1.19593	2.41487	1.87973	5.74724	9.8642	15.759	28.7154	31.7136	48.6583	58.0712	56.3946	73.1965	69.2029	78.9298	88.1702	80.9833	83.7596	77.2545	101.641	77.5638	78.8843	95.6173	107.938	112.325	131.629	155.485	183.225	205.929	265.982	286.216	323.49	346.426	356.067	348.76	336.519	341.359	289.143	287.822	252.312	226.036	175.846	161.276	117.446	89.234
2011-03-26 02:22:35		0	0	0	0	1.19605	0	3.08987	1.91569	6.24199	9.98503	15.8373	26.1575	32.2298	46.158	59.4407	75.3455	77.4952	76.5846	80.7821	75.4571	72.584	63.7103	76.099	86.1894	79.092	93.8801	99.6333	122.404	110.403	145.066	164.565	210.214	244.545	298.179	310.351	319.347	333.798	336.205	344.038	328.715	304.918	286.346	258.634	220.893	174.888	152.123	117.867	94.5622
2011-03-26 02:37:35		0	0	0	1.29093	0	4.44112	1.03005	1.91554	4.03285	17.8708	17.1968	25.7374	39.1744	48.7359	55.4506	60.6058	77.5436	74.9369	68.417	87.7904	73.7365	76.2647	82.7163	94.2821	86.8696	92.0974	133.582	135.182	153.588	159.029	202.586	208.235	254.822	295.16	327.593	324.554	352.987	356.728	360.026	370.279	320.936	281.649	244.143	219.641	179.978	153.636	113.88	95.7558
2011-03-26 02:52:35		1.63209	0	0	0	0	3.52891	5.66788	8.92548	9.8083	13.2469	20.7444	23.4649	33.5442	40.4311	59.6285	59.6542	58.0782	73.0285	70.767	73.6064	72.0635	71.8817	83.6356	90.8804	97.2728	107.205	114.741	126.224	130.699	151.554	158.8	205.357	258.307	311.12	334.644	343.785	337.535	349.394	358.42	323.33	296.548	291.751	243.522	231.905	184.712	140.749	126.308	98.3256
2011-03-26 03:07:35		1.63225	0	0	0	0	0	3.08976	5.74679	14.2655	9.15276	21.4752	25.0655	45.0567	42.1728	53.451	61.3314	73.884	70.5875	80.6913	73.151	73.1311	75.2824	75.3792	80.776	90.1808	93.5314	110.859	102.56	132.877	148.672	177.912	219.455	236.298	277.518	314.171	324.801	353.317	327.221	340.013	309.768	324.827	279.67	235.124	204.557	177.131	142.664	112.295	83.8744
2011-03-26 03:22:35		1.63207	0	1.39399	0	0	3.33051	7.20891	3.83083	15.3076	22.2745	25.7859	26.5773	49.7946	55.333	71.0292	60.8282	73.7798	83.374	77.283	63.9359	73.8231	66.0173	60.3872	81.5679	84.7256	86.117	107.124	111.839	127.361	155.725	212.929	247.239	288.023	328.603	367.167	397.484	398.913	397.923	412.317	402.426	353.446	336.212	269.758	227.746	204.383	157.721	126.582	94.2202
2011-03-26 03:37:35		1.63197	0	0	0	1.19563	0	4.1192	10.5336	13.886	20.2867	29.4754	38.3157	46.0436	62.6878	69.1705	71.167	75.2894	84.1173	82.1196	57.1795	56.2333	58.2119	62.4131	77.5519	87.3465	103.977	110.617	120.555	146.272	160.519	168.796	235.523	265.389	335.891	376.205	398.913	441.356	444.522	433.497	400.978	375.663	320.096	269.828	242.322	198.534	150.018	125.13	92.6369
2011-03-26 03:52:35		0	0	0	2.58167	1.19583	1.11006	5.14881	11.6839	18.1881	25.2652	24.6987	48.7301	55.8907	59.3545	69.0051	76.3471	84.941	77.2708	60.5587	70.3673	56.3619	56.5728	68.1647	54.2949	68.1519	75.3933	89.9692	99.942	125.919	151.056	194.327	242.722	265.096	330.715	387.772	386.987	435.029	420.33	436.231	401.737	368.375	329.25	263.145	244.62	183.059	159.365	113.049	91.5923
2011-03-26 04:07:35		0	0	0	0	1.19551	3.33003	8.23724	6.70269	13.3715	19.1128	29.8394	37.45	59.1151	65.3843	68.726	65.9006	73.6006	73.5468	68.2365	57.658	58.7503	56.5205	45.3702	56.7968	63.3228	72.2343	91.6317	93.5212	125.627	128.257	177.931	224.058	281.278	312.438	378.75	436.186	463.08	434.696	443.923	412.641	386.41	339.577	296.27	250.513	211.278	144.607	115.142	98.725
2011-03-26 04:22:35		0	0	0	0	1.19555	5.54987	4.11881	8.61756	9.80542	16.6379	33.5282	45.8526	51.2968	60.9442	74.5276	80.6622	80.7465	83.1247	62.0388	62.5067	57.7782	44.1827	54.3885	52.2596	63.5365	70.6295	82.9942	104.112	110.992	138.878	176.432	232.137	255.531	314.94	369.147	424.256	481.551	486.776	484.218	405.359	369.785	310.176	293.51	235.769	200.785	156.06	116.306	100.356
2011-03-26 04:37:35		0	0	1.39383	0	1.19555	3.32958	6.17785	13.4049	17.5252	18.5813	35.5978	46.8026	60.3458	62.4821	67.4429	83.1199	69.6708	83.2603	70.5212	60.2881	54.6673	51.2356	50.8234	61.6622	60.4237	74.8712	92.7561	98.8946	104.255	140.91	183.602	222.112	278.878	327.872	389.478	429.856	433.051	478.247	462.788	444.76	378.324	337.587	292.636	244.651	196.402	156.907	132.101	99.9772
2011-03-26 04:52:35		1.63155	0	0	0	0	1.10988	3.08854	4.78728	15.1529	15.8036	28.2636	39.2141	48.0804	61.7561	68.2554	65.4635	76.3827	75.7744	76.0417	58.2753	51.4381	47.7772	57.7199	55.0673	63.1292	81.4077	95.3054	108.078	96.4298	147.037	182.584	225.889	266.869	332.375	399.923	431.965	461.176	461.013	447.064	439.667	377.41	316.601	288.704	254.249	204.149	155.038	127.7	91.3712
2011-03-26 05:07:35		0	0	2.78766	0	3.58625	2.21969	4.11801	12.4463	13.3696	13.3075	26.0655	49.0359	47.8353	66.474	74.591	80.275	83.7212	67.5654	55.6231	66.8625	55.1144	55.7228	42.3535	56.1548	69.499	69.8154	93.8465	99.5106	112.734	130.807	183.784	215.317	291.15	338.234	370.202	440.875	467.247	447.128	448.128	422.08	386.862	300.303	302.009	240.601	207.238	167.348	121.112	104.287
2011-03-26 05:22:35		0	1.50807	1.39335	0.142999	2.25821	4.43849	2.87073	7.15587	13.1328	19.1273	30.1396	31.4511	55.3974	64.2497	71.0551	83.2625	70.1558	78.4058	71.7673	60.3381	49.8888	55.8128	52.4237	53.9651	57.6163	63.2317	94.6772	95.0571	112.119	132.686	191.691	232.662	277.811	339.731	367.801	421.503	454.849	468.208	465.378	445.231	392.776	344.359	287.903	242.093	203.69	163.996	122.752	98.5228
2011-03-26 05:37:35		0	0	0	0	1.19521	1.10965	8.23522	7.65853	9.53362	20.2101	35.0705	43.266	44.8965	53.3433	63.5942	73.4131	76.4038	74.4689	68.616	68.0119	55.4276	59.3827	54.2071	45.0997	59.9987	74.0494	105.852	92.0151	115.537	146.214	167.33	209.559	250.563	337.349	382.067	424.538	464.603	465.266	465.077	437.641	375.91	337.176	291.703	261.048	203.982	155.759	116.494	95.292
2011-03-26 05:52:35		1.63127	1.50787	0	0	1.19523	8.87696	2.87298	12.6442	13.3673	20.7897	31.6961	28.5623	47.7173	54.4298	77.7321	69.842	77.6949	72.6413	64.7205	60.8676	59.042	44.2029	53.6413	49.8731	61.4337	78.2263	88.0269	109.773	118.49	145.493	177.762	229.866	267.246	319.613	365.074	428.317	460.314	472.401	440.997	418.554	373.987	331.337	285.979	243.874	204.237	158.279	129.822	107.551
2011-03-26 06:07:35		0	0	0	0	1.19519	2.21891	6.17558	8.61433	12.4747	16.6297	14.0297	38.1029	50.1061	59.8468	60.8721	64.8288	65.6692	66.8885	73.0849	56.4551	54.4272	51.0558	40.5942	51.3183	65.9468	71.8237	85.7397	88.8468	125.721	131.953	154.768	199.193	263.924	319.037	376.026	422.426	430.042	457.728	461.442	401.096	366.596	336.292	286.496	246.026	208.049	163.59	131.951	88.9391
2011-03-26 06:22:35		1.63123	0	1.39327	0	0	1.10962	5.14638	6.70071	19.6038	12.4729	14.6984	42.7016	46.3558	64.3971	70.6359	74.4378	80.7894	65.1337	65.4535	54.4449	61.4577	48.3625	48.0381	48.5074	58.1074	72.8404	90.175	89.974	118.378	132.68	156.118	225.862	286.452	293.265	366.635	457.067	445.484	445.465	465.564	448.519	364.631	343.676	302.17	232.147	207.56	136.066	113.918	97.0446
2011-03-26 06:37:35		0	0	1.39317	0	1.19503	0	8.23359	11.4853	9.56481	19.5519	32.4561	43.875	56.5619	50.726	71.6849	66.5728	77.4981	72.7304	58.5394	65.9189	57.3599	45.3096	33.5093	54.5413	60.8478	73.7372	94.8958	94.9122	117.396	138.536	161.086	221.621	229.445	299.339	369.827	411.728	460.699	468.391	469.692	448.394	369.74	340.471	292.602	263.041	195.907	159.758	118.428	100.916
2011-03-26 06:52:35		1.63101	0	0	0	0	2.21875	7.20426	7.95077	16.1937	16.229	21.2069	27.8335	47.6478	50.9753	59.6074	78.8288	69.7712	71.4212	69.1587	59.1192	50.4494	40.1304	49.283	50.6526	57.791	66.9763	81.6833	102.761	100.716	135.216	157.738	204.832	282.428	319.551	370.34	386.301	449.5	453.256	437.135	404.484	386.888	330.827	262.131	248.412	206.508	149.473	118.42	92.692
2011-03-26 07:07:35		1.63083	1.50751	0	0	0	3.32817	3.08758	9.57071	11.3711	23.6667	35.1487	33.7952	44.5872	54.7856	61.9551	68.8859	71.3763	76.1446	71.6933	61.424	54.9282	57.3631	51.2391	53.2606	69.2455	76.3923	87.0785	97.5599	108.719	141.202	172.147	218.371	276.741	316.843	354.705	393.888	427.532	424.615	418.122	384.824	362.529	312.987	275.212	243.732	199.67	151.058	129.784	90.3801
2011-03-26 07:22:35		0	0	0	0	3.5849	2.21867	10.2905	16.2693	15.8256	19.8362	29.8047	31.3161	62.3353	57.384	66.4974	67.7067	83.534	68.3343	69.9907	66.6064	58.9955	62.1407	53.8138	62.6189	65.8577	72.6128	83.3891	105.108	119.451	139.413	189.251	229.239	255.517	305.212	366.66	387.359	397.179	417.551	439.888	386.131	348.663	323.442	283.245	237.798	193.832	163.331	129.569	92.6199
2011-03-26 07:37:35		5.80869	0	0	0	0	3.32817	3.08684	9.56946	8.90843	17.6162	28.1086	38.2006	58.8753	54.9628	62.0603	78.2301	82.5574	71.9731	67.9516	47.1769	59.1462	44.6788	47.2151	49.3106	52.9606	64.2811	65.4821	95.3631	108.746	133.758	185.923	215.779	259.435	309.834	374.458	413.564	445.756	442.728	459.843	418.635	359.372	330.321	300.679	258.079	203.377	156.574	112.788	94.7878
2011-03-26 07:52:35		0	1.50723	0	0	1.19469	2.21851	3.08692	2.87055	20.1403	17.9575	30.2157	35.0045	46.2237	58.75	83.7022	65.3106	67.8718	65.4061	58.884	58.099	50.5279	37.0237	51.833	61.3782	54.0997	69.1747	78.3821	82.6647	105.837	142.648	163.618	226.356	258.964	306.332	348.128	406.571	469.327	443.522	471.032	434.442	391.728	327.955	292.117	249.726	203.125	159.401	121.324	83.4269
2011-03-26 08:07:35		1.63079	1.50743	1.39291	0	1.19481	3.3275	3.08686	7.05567	16.593	17.5941	21.9371	24.5012	47.3	59.1654	56.541	78.9923	84.8997	61.526	68.4474	60.1032	50.8513	51.7433	53.3035	56.4301	51.1465	72.8888	83.5952	97.2939	107.152	146.753	179.806	203.023	258.305	308.846	364.029	408.048	455.724	444.583	429.561	408.49	355.378	320.279	281.184	255.659	207.706	159.842	129.094	90.2375
2011-03-26 08:22:35		0	0	0	0	0	1.10912	1.02897	12.8055	11.9485	20.1178	24.5859	28.2792	47.149	59.0612	62.6792	61.6141	75.5958	73.7904	59.1843	60.5946	45.8965	46.791	45.6926	56.251	50.3051	66.9872	68.9484	82.9878	90.6003	134.734	171.851	220.559	253.093	313.842	371.76	421.359	434.772	433.853	421.503	411.327	374.734	326.244	277.636	238.426	190.034	151.877	124.97	92.9548
2011-03-26 08:37:35		0	0	0	0	0	0	3.0866	8.96558	11.2498	21.7785	32.5093	31.5483	38.6333	56.8064	66.5561	68.0744	66.2253	62.0907	60.4625	60.9144	54.5949	47.6157	52.5679	55.2638	57.0984	72.0042	69.2048	82.0603	113.035	125.911	157.059	230.002	266.603	310.613	373.929	440.875	439.442	449.92	444.66	406.692	377.875	311.825	294.207	242.981	186.172	157.947	118.608	99.6391
2011-03-26 08:52:35		0	1.50717	0	0	0	1.10899	2.05769	12.8254	8.5476	11.6367	23.2546	34.575	49.2397	53.7301	63.5766	72.5394	69.9205	74.0154	69.6436	57.3929	51.3606	42.9692	44.0228	48.2734	63.2446	67.0051	74.4449	97.3821	117.597	137.127	170.13	214.523	263.273	306.34	354.122	422.064	446.708	459.679	427.808	413.16	390.593	338.196	281.208	243.378	201.897	156.995	128.043	91.8619
2011-03-26 09:07:35		0	1.50717	0	0	1.19455	0	3.08658	4.78385	5.1792	20.3067	33.316	36.2269	49.2946	55.158	66.7228	64.5917	68.234	58.0256	65.9606	57.3676	52.9093	49.141	50.7503	42.1869	49.6135	76.4077	79.8279	79.9718	104.905	151.669	166.851	210.809	252.16	299.704	340.321	405.978	423.474	429.401	416.503	414.5	392.763	349.048	273.67	244.729	198.481	143.938	114.978	90.7728
2011-03-26 09:22:35		0	0	1.39259	1.28966	0	0	4.11532	5.74064	8.01619	21.786	37.5279	35.325	38.7394	50.4484	56.0558	69.2494	74.3285	61.8186	69.5542	54.4779	51.9984	52.4667	48.1115	50.3929	67.033	69.6138	65.2785	85.7554	112.3	154.525	159.251	215.807	276.078	304.169	368.157	411.244	435.609	438.76	421.875	412.199	363.247	320.2	292.244	235.439	194.337	149.681	121.85	102.637
2011-03-26 09:37:35		0	1.50697	1.39269	0	0	2.21795	2.05749	7.65327	12.4686	23.2696	33.3183	24.2923	54.1705	43.9212	77.2984	58.2769	76.8353	70.4362	60.8346	61.9917	62.0471	59.5074	45.8401	57.2862	61.8067	73.0314	91.0519	96.5692	110.573	127.638	160.981	222.49	247.296	298.512	354.003	408.907	410.189	418.987	440.795	402.151	359.343	321.827	271.072	226.434	186.58	145.246	118.047	104.814
2011-03-26 09:52:35		0	0	0	0	0	3.32657	5.14324	10.5226	17.6837	18.4011	25.6641	34.3744	49.4353	53.2324	64.1298	64.9782	67.2952	75.1186	56.4663	60.5872	55.0804	52.2337	48.9122	51.7401	70.2468	80.4548	81.3987	109.998	107.686	150.1	166.336	206.002	268.584	295.567	354.708	406.333	432.869	428.843	423.885	399.292	350.381	293.209	274.473	217.883	198.89	157.104	117.113	100.848
2011-03-26 10:07:35		1.63033	0	1.39247	0	2.38882	2.21787	6.17221	8.03699	16.4565	17.751	30.489	33.1481	47.9705	47.2766	69.2263	77.6077	74.5788	72.0641	67.9551	60.5208	51.5744	48.9449	61.5635	57.2814	62.6772	79.5792	84.9721	95.2487	118.264	140.032	166.559	211.641	259.425	306.304	345.106	360.103	418.635	414.006	418.804	386.006	342.061	298.049	251.604	233.808	184.708	161.44	120.34	102.671
2011-03-26 10:22:35		1.63011	0	0	0	0	5.54487	5.14346	10.5229	16.92	21.4517	31.0952	37.5939	41.591	53.7795	60.1087	52.1311	54.5356	67.3231	59.2917	59.1487	51.4558	64.1567	63.9128	49.8987	60.009	81.0087	94.9837	93.5446	120.833	124.02	173.46	216.11	254.535	312.31	348.381	369.442	382.189	411.343	376.865	368.833	330.253	314.898	276.512	219.127	198.586	151.326	134.457	94.0035
2011-03-26 10:37:35		0	0	0	0	0	5.54455	2.05719	9.56583	9.58176	17.0497	29.0485	39.6872	37.4689	54.3183	65.617	65.6199	75.8929	65.2337	63.3981	65.6314	64.4869	59.2317	70.7487	57.2119	66.0756	73.4048	93.5974	91.7587	118.768	126.447	167.149	212.308	248.848	289.006	345.76	367.5	407.673	421.615	377.907	368.987	349.051	304.323	275.667	232.191	188.958	147.139	118.079	89.9202
2011-03-26 10:52:35		0	0	1.39249	1.28936	2.38878	4.43529	6.11208	7.70837	11.5766	17.9013	16.7812	33.0542	48.8974	57.1449	60.0689	58.0304	69.1045	64.4029	70.5942	66.2554	68.2872	63.9558	56.4099	59.5763	70.626	85.8176	80.2625	101.03	121.41	143.187	171.14	221.136	236.717	287.354	332.372	352.561	394.189	397.449	387.712	348.885	307.358	289.721	253.736	218.934	185.415	155.204	123.06	95.2728
2011-03-26 11:07:35		1.63025	0	0	2.57887	2.38872	2.21773	3.08596	14.3488	7.12439	20.7759	33.9369	33.3442	35.8551	54.7929	41.683	61.0147	68.9907	63.7317	71.95	68.2304	59.9051	60.5378	65.8247	58.3304	67.0272	76.0208	93.1798	98.7696	119.492	154.928	160.835	206.054	238.518	261.188	286.811	313.452	358.554	368.042	376.526	366.372	335.157	310.262	264.545	227.24	191.3	137.644	115.659	95.1929
2011-03-26 11:22:35		0	0	0	1.28936	1.19433	0	3.00984	9.63683	13.2612	21.6965	25.6763	31.6404	39.3497	41.7247	58.6724	63.8689	65.7407	71.3875	61.1984	76.7253	72.4949	53.3949	63.8619	73.0423	65.6772	69.4455	103.316	97.1808	108.746	139.205	172.991	184.127	216.999	284.573	299.501	324.545	334.192	376.737	355.138	339.917	302.61	275.557	257.656	210.457	174.056	151.402	112.68	98.1381
2011-03-26 11:37:35		1.63017	0	1.39243	0	1.19441	0	1.02863	12.876	10.2768	15.186	20.5218	34.0654	44.0522	44.3122	58.983	62.5859	68.8276	67.3381	76.3949	71.9968	64.4487	60.2699	71.3904	66.0067	77.6968	75.6837	85.8888	107.084	101.512	123.934	177.162	187.698	232.779	260.527	287.662	320.09	359.462	349.58	323.34	340.679	294.327	290.793	262.915	205.954	194.874	153.373	118.1	100.891
2011-03-26 11:52:35		0	0	0	0	0	2.21759	6.17173	9.56554	8.01455	19.1122	25.001	33.8946	32.8228	45.9872	62.8298	54.7782	66.592	75.2946	73.5298	73.0295	78.7612	63.7478	76.3071	64.1644	76.2952	75.1619	80.6923	96.6673	98.6292	122.027	146.771	187.228	214.796	249.93	314.347	302.812	313.413	355.272	335.321	347.721	326.532	297.001	266.871	207.596	189.183	146.963	120.481	89.0628
2011-03-26 12:07:35		0	0	0	0	0	2.21767	5.14279	7.65237	12.4667	17.4505	24.7256	24.6548	32.8808	49.0147	52.9917	55.2984	69.4917	71.3449	74.6904	82.326	70.8096	69.7772	70.3712	65.7292	75.4151	90.5131	83.9317	99.8035	107.793	122.468	135.28	198.562	204.583	246.577	285.665	309.581	339.926	335.157	319.892	333.516	312.113	292.943	255.078	220.465	200.495	162.162	118.681	89.0205
2011-03-26 12:22:35		0	0	0	1.28958	2.38854	1.10883	6.07939	7.16625	7.65715	11.0358	25.4338	25.7896	42.5516	40.692	61.0885	65.9891	64.4538	71.0006	72.7712	89.2071	69.6949	70.208	76.0984	67.4202	75.1599	68.1317	92.5577	94.2224	110.569	116.644	147.835	177.626	190.599	236.222	297.238	296.719	323.189	304.056	331.237	319.269	300.417	300.238	256.046	232.772	167.001	144.265	106.476	82.5974
2011-03-26 12:37:35		0.916327	0	1.39241	0	0	2.21771	5.14298	5.21067	14.6375	23.8431	25.7641	26.9828	35.0093	55.5538	49.4731	52.6804	60.2058	77.0359	63.6872	70.8869	71.0179	68.3429	61.3817	62.5654	79.0676	80.5391	81.192	106.541	108.094	119.937	146.566	195.557	229.83	267.79	319.088	335.042	362.869	354.484	331.567	323.856	303.544	276.414	261.847	232.546	183.295	146.535	111.645	98.4795
2011-03-26 13:52:35		0	0	0	2.57838	2.38854	12.6772	32.4644	34.8603	59.1846	64.0038	86.1279	91.4929	104.714	79.041	113.095	97.483	77.4285	89.0987	81.9801	71.1952	69.9731	79.5115	72.5538	70.6913	72.5404	83.7109	79.4337	116.579	110.845	130.477	146.799	164.986	182.702	203.868	246.418	259.978	269.511	277.444	286.186	293.439	277.049	246.078	215.913	198.686	174.95	142.268	111.883	88.8952
2011-03-26 14:07:35		1.62997	0	1.39215	1.28922	5.97083	14.4122	15.3852	35.876	44.9901	53.7006	49.3574	76.9837	72.251	84.6208	82.9859	75.9631	75.7272	71.0173	81.5138	65.5958	64.4788	68.6862	71.1244	69.8737	75.2314	78.3878	90.5038	95.5689	115.029	130.168	153.792	164.874	190.423	216.136	240.861	283.57	292.288	291.907	309.391	281.504	275.947	243.163	216.148	209.842	168.293	124.806	106.66	85.7109
2011-03-26 14:22:35		0	0	0	0	4.77673	8.8691	15.4263	25.7708	30.2666	42.4212	57.4151	67.9753	69.8189	82.0234	67.3439	75.3433	66.8901	77.958	62.4237	77.5381	64.0651	64.1186	70.2176	71.7125	75.6471	84.5372	100.164	97.8888	111.431	111.125	132.404	147.771	180.659	178.55	235.245	266.352	259.67	287.734	299.277	274.573	274.423	249.886	224.293	197.985	170.312	125.567	105.532	90.8321
2011-03-26 14:37:35		0.292568	1.23602	0.793189	3.43625	12.8544	4.43439	27.7668	48.776	57.7833	73.7635	73.7696	75.0404	86.225	78.6843	93.8256	87.3503	79.133	79.1958	80.6532	86.4869	70.3256	66.1253	68.8756	61.6125	72.574	86.0926	76.4362	87.6997	103.175	125.659	147.901	158.576	192.286	221.983	239.329	279.906	258.017	283.61	280.447	270.308	284.842	261.59	230.992	209.654	152.911	120.419	101.56	91.7349
2011-03-26 14:52:35		0	0	0	2.57829	4.77679	8.86949	25.6855	28.6506	39.184	57.9349	80.9974	72.6173	85.4548	87.3548	91.9747	91.2968	78.5558	85.9353	89.4974	76.0317	70.0859	66.9346	74.4583	73.2478	77.4657	82.259	74.451	88.3179	100.554	123.317	127.279	155.563	183.54	232.053	243.546	237.911	263.954	271.204	284.681	279.439	245.593	249.996	226.885	194.331	166.08	139.704	103.743	77.5673
2011-03-26 15:07:35		0	1.50637	0	0	2.38822	3.3258	10.2842	10.0281	19.154	29.6765	32.8692	30.1484	44.1913	41.2686	32.9907	42.0702	37.6503	55.6785	52.6712	51.9744	51.6583	56.0436	55.617	39.6978	49.1869	57.3147	58.0756	63.3189	73.9077	83.5651	81.9013	103.177	130.981	134.535	147.949	166.198	165.607	177.562	185.699	198.297	174.611	154.165	153.564	144.183	130.105	90.5141	80.6599	70.3256
2011-03-26 15:22:35		0	0	0	1.28886	0	0	3.08484	0.956269	0.890144	0.83075	6.06343	4.79933	4.60747	12.2003	12.9614	17.2192	23.1995	22.9555	27.227	24.758	28.4072	37.9577	31.2913	30.2746	37.6244	37.1208	36.6324	33.6423	48.891	47.8026	65.4397	61.4554	73.2449	85.8112	90.8353	98.6766	119.968	113.275	141.941	130.711	135.553	121.489	131.476	116.571	94.592	89.9391	67.2772	61.1247
2011-03-26 15:37:35		0	0	0	0	0	0	0	0.956269	0.890224	1.66142	3.00573	4.89324	2.57013	5.78628	11.3029	16.9739	17.7045	23.6941	26.4878	36.125	36.7519	29.8486	33.2276	36.0026	31.6224	30.2274	35.6853	35.2385	51.6734	41.8096	69.5244	67.9779	75.8647	82.7833	98.6452	96.7853	97.2782	110.769	127.68	126.596	134.565	132.674	120.276	124.864	94.0567	77.5628	77.0221	52.1612
2011-03-26 15:52:35		0	0	0	0	0	0	1.02833	0.956269	0	3.32272	1.49894	3.54785	5.01067	8.18446	11.7233	14.0471	19.25	32.2936	25.5246	32.7365	30.405	33.0314	25.8239	37.8644	35.8705	39.9494	37.201	42.5292	52.0051	53.2314	50.9715	63.7231	66.6462	76.5721	82.8532	88.467	116.218	116.58	122.41	137.061	139.368	140.298	118.636	106.752	93.1904	84.7314	74.5763	55.1769
2011-03-26 16:07:35		0	0	0	0	0	0	0	0	0.890045	1.66124	2.98608	3.38298	5.29603	6.73417	8.79795	13.7236	19.141	21.0144	32.4814	29.9455	30.4479	37.7962	31.0992	34.2529	35.7856	39.6337	38.2859	41.167	48.1253	57.7199	57.0071	48.783	59.3817	77.3571	78.3083	105.274	98.9554	128.089	127.704	139.583	133.726	132.838	125.11	123.473	82.2897	79.8375	67.8519	52.0734
2011-03-26 16:22:35		0	0	0	0	0	1.10823	0	0.956208	0	0.83059	0.732253	4.19567	5.26558	9.19176	13.9318	15.6022	16.175	22.9786	31.6599	33.7163	34.4401	30.0509	31.2284	34.3689	28.7215	38.0795	38.4308	44.2327	41.9548	53.7054	40.6731	48.6846	75.6109	80.326	96.7513	96.1567	107.607	121.244	129.481	135.777	134.071	127.953	126.797	118.768	104.933	84.0603	73.4798	60.8237
2011-03-26 16:37:35		0	0	0	0	0	1.10823	0	0.956109	0.890045	0.83059	0.724138	3.43625	5.74676	8.82038	10.7686	15.4138	17.9181	24.778	32.0808	27.5166	30.6132	33.184	36.5196	31.4271	31.7871	35.549	39.5942	47.224	46.066	52.9862	56.9526	74.2513	66.3003	92.7513	98.842	106.057	111.841	124.485	132.744	141.739	129.934	131.037	128.037	96.7006	98.2038	74.5718	68.3689	57.8051
2011-03-26 16:52:35		0	0	0	0	0	1.10823	0	0.956029	1.78025	4.98365	4.54606	4.2475	9.70837	6.6166	12.0753	17.4754	13.4452	26.3068	30.0585	32.2503	29.4245	29.9435	29.7809	29.9916	41.3468	31.3816	36.226	49.4147	47.6449	47.358	62.4587	63.1375	66.3779	91.4471	82.1622	108.064	105.594	126.693	136.687	128.712	128.365	130.655	123.582	118.592	101.586	77.858	64.2045	53.9837
2011-03-26 17:07:35		0	1.50603	0	0	1.19375	0	3.08444	0	2.67027	4.15292	4.51625	2.08538	7.75462	6.07817	5.69962	14.0666	22.6941	23.0349	25.4363	30.6476	28.3161	34.0763	38.8946	30.8075	35.8311	35.6253	33.2962	31.0078	48.4708	55.1676	58.8577	67.1574	75.7051	83.0564	92.2228	89.2881	110.448	122.373	122.189	134.696	128.238	136.42	125.484	120.524	93.7625	87.7663	70.3372	63.8179
2011-03-26 17:22:35		0	0	0	0	0	0	0	0.95599	0.889965	0.830529	0.729407	0	7.38394	10.4609	12.3371	10.6965	20.6138	17.868	27.5361	25.7604	26.2771	33.3692	33.2125	28.5349	34.6926	31.5435	37.5606	36.3696	39.0301	51.2535	56.8821	58.626	76.2609	87.0917	93.9253	105.454	102.222	125.164	124.054	139.165	124.655	128.964	125.308	113.586	96.9782	74.5141	62.5753	53.1003
2011-03-26 17:37:35		0	0	0	0	0	0	0	0	2.67009	0.830529	1.52248	2.09575	6.39167	4.02779	17.1108	12.376	20.8628	24.2414	34.3503	27.0295	27.0873	28.9732	29.0571	31.4721	38.9609	38.5683	30.5284	39.4516	47.9506	54.2192	58.1147	59.2712	74.5346	75.9051	85.4994	83.9497	97.591	109.245	124.185	118.524	130.437	121.673	137.256	113.849	84.524	85.1913	67.4426	60.2391
2011-03-26 17:52:35		0	0	1.39167	0	0	0	1.02796	0	0	1.66104	0.750362	1.36386	9.03106	7.1541	13.9113	16.6016	20.3684	27.7692	21.4181	23.507	27.9119	28.0639	26.61	30.8412	36.0788	36.0237	43.3875	39.0833	36.7349	48.4901	58.0506	69.0324	71.3567	79.5045	92.8904	96.2795	104.182	114.539	122.499	133.273	120.126	130.184	122.524	112.995	101.865	83.1933	76.2054	51.8667
2011-03-26 18:07:35		0	0	1.39161	0	0	1.10813	1.02803	0	1.77991	1.66094	2.28059	2.74812	7.00135	6.00917	8.65147	13.4701	22.5542	26.7385	19.8546	25.9249	28.5495	34.1494	24.5779	31.0295	33.5837	30.2917	31.7832	37.4657	47.0333	47.2125	49.4186	66.9587	67.7593	74.0186	94.2763	95.9385	113.55	118.243	119.751	122.22	129.004	133.564	111.757	111.389	93.2186	91.0606	67.1468	58.9385
2011-03-26 18:22:35		0	0	0	0	0	0	0	0	2.66991	4.15253	3.0091	4.14426	5.18083	8.85282	9.19801	18.3636	15.6251	27.2821	21.6716	27.9589	29.0581	30.616	29.1604	33.0474	31.8654	33.5574	40.4913	39.3936	35.816	48.7913	60.5343	71.2404	67.5218	93.5205	101.146	103.321	111.102	117.4	118.819	118.049	122.069	117.146	128.47	97.9894	91.5798	87.0224	71.5721	65.817
2011-03-26 18:37:35		0	0	0	0	1.19347	0	1.02788	0.955891	0	2.49115	2.24163	4.2099	4.97516	11.1181	12.9578	15.811	14.5731	25.624	31.4557	33.7442	30.4852	33.6452	30.6468	26.4032	23.5553	34.6901	42.283	37.5891	47.0359	65.2949	55.25	55.3115	77.7042	82.075	89.5115	96.2019	115.878	115.207	128.271	123.766	138.355	118.393	113.022	119.198	97.4596	79.6269	68.8359	61.0506
2011-03-26 18:52:35		0	0	1.39143	0	0	0	1.02774	0	4.4491	4.15186	1.48129	2.05793	1.38882	6.85571	10.2376	19.9483	24.2598	25.5126	30.4912	28.5845	26.7734	34.5708	30.7322	30.9942	26.7612	30.7658	39.2901	42.159	44.4288	57.4212	51.0849	66.1054	71.0776	67.3583	79.0567	109.517	124.87	107.634	119.401	149.183	139.627	124.071	108.157	118.415	115.132	90.1853	78.2715	66.5125
2011-03-26 19:07:35		0	0	0	0	0	1.10809	0	0	0.889885	0.830388	3.01639	2.6744	5.05987	10.1249	12.0735	17.6602	24.0941	29.4992	28.9874	31.5349	26.6875	27.4659	22.7055	26.9513	34.6933	37.9013	43.8167	41.1631	53.126	48.8	59.7593	62.5603	61.8042	74.166	71.9	90.7756	92.9317	123.548	125.023	116.825	135.136	128.68	121.05	113.637	92.1696	85.1583	80.1276	62.967
2011-03-26 19:22:35		0	0	0	0	0	1.10793	0	0	1.77955	3.32122	2.19912	4.38638	6.49369	7.33423	14.7685	14.3339	22.8068	25.396	29.4692	32.6782	29.5691	29.0661	26.8019	30.247	34.775	41.1442	40.8692	41.6952	42.4192	48.7792	58.4388	67.4436	80.1702	75.1894	87.2763	93.3657	103.223	112.339	123.576	128.151	141.51	139.787	119.942	117.167	91.699	77.1628	74.7157	51.4426
2011-03-26 19:37:35		0	0	0	0	0	1.10791	0	0.61158	0.320372	0	2.26288	4.96333	1.96741	5.79128	10.6501	13.15	19.866	26.8486	28.4153	28.6823	25.6442	30.8936	28.6957	33.1096	33.2096	34.9147	34.4769	39.1837	46.9532	57.7673	65.8404	64.9446	68.8054	81.4	80.1003	90.2705	103.836	125.952	124.808	126.667	128.636	125.565	116.709	99.4881	100.886	86.8045	72.3263	63.2766
2011-03-26 19:52:35		0	0	0	0	0	0	0	0.955728	1.77943	2.49088	0.764224	1.37117	5.37353	5.97962	8.72814	14.7511	17.5459	26.7901	28.7662	28.6665	27.6346	21.232	21.3189	31.4101	34.8849	36.309	43.4279	38.9683	48.8724	52.1583	52.9365	67.9827	66.8516	83.2269	97.9785	85.3535	121.327	115.206	131.839	135.194	108.004	128.055	114.32	107.159	99.3388	80.5946	65.0186	58.574
2011-03-26 20:07:35		1.62861	0	0	0	0	0	0	0	2.66923	2.49074	1.45417	3.50151	7.23426	7.51535	11.9964	18.2372	15.7983	25.3698	33.1349	23.7237	32.7019	20.2387	32.9311	31.4361	33.2071	43.6228	36.5657	35.9692	45.4779	55.2022	45.7997	61.9048	71.525	80.833	76.6894	102.966	108.537	121.183	107.449	115.497	134.904	133.365	129.766	109.239	98.4074	77.308	69.0615	62.9103
2011-03-26 20:22:35		0	0	0	0	0	0	0	0	0	0	2.95873	4.04013	3.34862	9.81311	13.1334	15.2861	21.2939	22.3738	30.1875	33.9144	35.1808	26.9652	29.7516	27.3808	24.7262	33.1984	41.549	32.434	46.3612	49.5795	66.3708	70.6308	66.1407	85.1215	82.0167	85.0026	95.8696	114.952	123.622	140.05	131.587	139.305	124.71	114.131	97.1968	88.2247	75.3298	60.9782
2011-03-26 20:37:35		0	0	0	0	0	0	1.02774	0	2.66935	1.66044	1.49111	3.44064	8.09574	15.2997	16.8462	12.5988	20.1082	20.4014	33.9353	30.9395	29.8484	36.7071	32.7708	32.7728	30.5343	33.5003	38.9458	35.1872	45.442	53.1859	66.1013	71.4279	73.6446	78.2122	86.4032	105.939	110.455	127.071	138.309	128.199	145.513	130.912	122.554	113.904	107.56	91.6176	68.3244	59.5641
2011-03-26 20:52:35		0	0	0	0	1.19329	0	0	0	0.889644	2.49061	4.57471	2.73161	4.46574	7.59141	15.6062	11.2785	19.8281	21.5841	29.8892	24.5439	30.6132	31.2099	32.916	25.0345	41.1801	38.5756	35.7317	53.6388	53.5763	53.2237	73.6865	59.5208	86.4766	86.8224	98.9856	118.269	112.311	145.379	128.69	131.016	122.989	135.934	119.187	106.978	91.5506	75.6814	73.35	55.8804
2011-03-26 21:07:35		0	0	0	0	2.38632	2.21534	1.02766	3.82247	1.77927	8.30167	9.88455	9.35968	13.0218	18.0132	26.2282	20.855	24.5987	28.2204	29.8722	37.8811	30.5755	34.651	28.8145	32.8593	31.5399	35.0189	44.3375	46.317	38.6349	53.5013	58.0679	58.8385	80.0606	90.5353	107.617	130.871	131.621	153.708	151.424	132.837	143.223	137.78	128.948	114.948	98.1112	74.1449	83.6375	63.1785
2011-03-26 21:22:35		0	0	0	0	0	0	1.02756	1.91094	0.889583	2.49026	4.45647	7.87535	15.0953	9.58503	19.0481	19.8025	25.0074	22.4629	22.9103	28.8161	33.5756	28.382	30.6767	27.0032	37.3064	40.6381	37.0022	54.9035	57.2968	59.1654	75.0558	82.216	97.674	93.3929	115.72	123.904	120.525	141.066	147.16	153.678	149.786	147.907	144.441	133.569	104.333	93.7657	80.5157	63.6946
2011-03-26 21:37:35		0	0	0	0	0	0	6.16542	7.64484	4.44811	6.64119	5.93474	14.4612	20.5733	23.3972	28.0457	23.9427	29.2949	28.9507	32.2253	43.8756	35.3747	30.2508	30.6192	33.0821	34.1513	35.3199	42.2032	46.2247	58.8458	63.7801	73.1083	83.1894	99.9109	110.455	137.354	120.549	149.996	153.536	159.932	189.415	160.957	158.394	145.701	132.446	103.106	97.0048	79.317	65.9647
2011-03-26 21:52:35		0	0	0	0	0	0	2.21207	10.365	14.2327	11.6213	19.8654	17.9153	20.8251	24.9441	32.9253	23.3255	31.721	26.0819	38.9317	42.3151	37.8821	34.6657	30.5549	33.734	41.6484	40.0131	48.3179	51.4353	49.3292	67.667	76.4176	94.3	107.838	110.728	131.376	149.864	153.756	169.852	178.6	174.407	165.485	150.589	151.909	133.16	114.666	112.753	78.4788	74.7913
2011-03-26 22:07:35		0	1.50509	0	0	1.19301	5.53804	4.10997	4.77792	13.3435	11.2733	16.1967	15.698	16.1823	16.394	25.2563	27.89	38.8814	35.6295	35.5343	37.2785	38.4167	43.342	28.7987	32.7519	37.2785	34.3901	40.1292	42.0208	53.7494	68.367	81.6923	69.4077	106.405	118.906	124.938	139.98	155.106	163.746	162.256	155.104	158.808	162.141	142.516	125.625	116.368	93.2054	83.7503	62.8705
2011-03-26 22:22:35		0	0	0	2.57584	0	7.29256	8.82349	10.3471	10.6743	22.4119	18.2528	28.9776	23.5451	25.868	40.6987	31.7901	30.0936	36.8766	30.3109	37.3824	35.7077	39.6615	26.3081	31.7404	40.4724	40.941	46.9468	46.6603	50.4942	71.3337	72.8019	86.7994	105.103	123.479	132.811	150.253	138.169	167.302	164.575	169.728	163.806	141.945	146.49	122.993	117.652	91.2199	75.8433	68.6603
2011-03-26 22:37:35		0	0	0	0	1.19301	2.21534	4.29696	7.1924	12.7111	18.4533	19.6014	18.1559	22.8479	28.0469	26.8163	33.6958	29.2077	32.5112	39.6196	38.5394	30.2652	30.2344	36.7875	37.2538	29.4731	45.375	45.3054	49.3788	61.0093	73.3545	89.2635	98.6253	118.516	132.372	151.136	150.288	161.13	181.554	178.738	183.974	176.22	169.477	150.709	132.877	120.337	85.7167	86.0654	65.1615
2011-03-26 22:52:35		1.62829	0	0	1.28802	1.19293	1.10759	3.08239	3.82192	2.66855	8.30061	10.5252	10.3776	14.9683	24.8944	28.2332	29.3724	34.3256	39.2962	37.4314	32.659	25.8363	24.2104	29.9391	27.4297	36.3487	37.9179	49.0494	54.3564	53.2599	83.5689	91.9788	104.588	111.9	131.194	156.569	147.242	181.54	190.767	183.842	189.149	176.811	177.239	172.24	151.482	126.919	94.4237	80.217	59.7888
2011-03-26 23:07:35		1.62821	0	0	0	1.19303	3.32263	4.10952	6.68827	8.00532	9.63923	12.3758	14.7845	16.9156	25.8872	31.4627	27.0962	32.5106	31.104	32.3381	28.6174	31.0551	26.7977	29.9405	27.8762	27.9705	35.8766	48.9715	54.1571	61.5538	74.0522	100.509	116.121	123.065	136.538	164.103	174.043	190.535	179.153	200.04	195.401	172.556	176.867	170.23	146.31	117.602	99.0731	73.8756	64.059
2011-03-26 23:22:35		0	0	0	1.7482	0.766548	1.10761	1.02744	7.64349	5.51888	11.1257	10.7028	7.44455	20.372	21.7662	32.5292	40.4436	36.0058	41.0654	36.7673	33.1827	30.7526	25.6374	31.7035	38.6295	36.0936	36.4006	49.5638	51.8218	60.6532	67.5397	99.6532	115.312	137.416	140.877	162.215	182.901	204.503	215.17	214.623	224.385	202.788	187.901	171.356	137.654	126.703	101.194	87.6872	64.7647
2011-03-26 23:37:35		0	0	0	0	0	4.43022	4.10968	7.6434	5.33705	14.94	15.1094	20.5209	19.6018	26.7795	32.4792	35.376	35.5782	29.4914	37.575	38.7327	36.9019	29.5938	32.2571	41.5083	35.3663	32.1173	61.1599	50.1933	59.6019	82.7561	89.3837	112.614	139.892	167.424	173.798	210.064	227.72	222.64	213.92	196.276	182.64	181.981	160.404	141.621	124.737	114.203	85.8756	70.9609
2011-03-26 23:52:35		0	1.50505	0	0	0	2.21513	2.05473	1.91082	6.22625	4.98003	12.8274	21.54	21.2975	24.3261	31.6174	32.0891	29.4996	37.1478	36.6558	27.8544	38.0369	31.4918	31.3592	28.4755	30.3097	36.5474	49.1567	59.1298	74.0208	74.1468	113.894	115.464	136.036	143.648	176.777	173.74	197.168	213.371	199.099	206.59	182.917	189.752	167.957	157.891	130.523	98.5564	82.8205	71.3253
2011-03-27 00:07:35		0	0	0	1.288	1.19303	1.10765	2.05509	1.91104	6.22663	9.13003	18.1809	16.8113	29.951	37.1064	32.4426	35.5542	42.8087	39.6471	34.9253	28.1809	33.0699	27.7031	30.3728	31.2714	31.9668	40.0208	36.8679	65.3481	71.5728	83.6545	102.115	115.216	148.217	151.13	183.267	204.098	212.36	211.472	222.4	231.771	205.535	191.484	170.383	148.708	125.825	89.9821	87.2196	52.0872
2011-03-27 00:22:35		0	0	0	0	0	1.10751	3.08207	6.68776	4.44708	13.8039	18.5477	21.5799	22.5094	27.725	30.8325	30.6911	44.2449	33.8971	39.8458	31.8884	29.395	34.9833	30.5653	37.7038	36.4958	31.0423	50.4106	58.1516	57.2321	79.3705	102.239	127.804	137.121	169.705	194.946	209.91	207.179	218.381	228.081	217.496	206.615	181.639	184.565	150.889	130.707	107.241	74.7551	60.1327
2011-03-27 00:37:35		0	1.50509	0	0	1.19279	1.10741	3.08177	3.82157	12.4515	12.4492	7.38433	16.1298	26.734	38.3199	34.134	40.1224	43.1542	36.6772	35.3481	33.766	26.7472	35.3779	32.626	37.9622	37.8667	43.7026	42.8596	44.6913	68.2449	82.691	101.605	119.708	152.179	166.41	184.137	194.201	231.072	219.072	213.66	229.922	206.847	180.665	146.845	143.375	118.177	101.516	90.6997	73.2247
2011-03-27 00:52:35		0	3.0097	0	0	1.19283	3.32237	2.05449	11.4642	12.4511	11.0298	17.2498	12.7107	28.9281	24.0869	33.2038	31.7167	40.1506	30.5437	39.0628	27.2278	35.8103	33.0321	31.519	29.5854	32.541	38.7792	41.4542	57.2276	67.309	76.3641	97.3577	118.77	145.683	171.498	179.744	196.919	202.73	223.658	222.181	206.514	206.765	191.537	176.825	142.226	121.508	108.768	77.6413	60.5026
2011-03-27 01:07:35		0	0	0	0	0	1.10749	5.32946	6.50846	7.29801	16.1236	16.1825	14.7565	22.2891	31.8285	32.8734	32.9587	33.3856	32.0457	35.8266	33.417	35.026	26.8806	32.7994	33.3516	28.3644	51.9045	51.5728	61.0519	70.1263	95.5183	91.8651	117.644	141.979	162.62	166.44	205.497	206.294	220.905	205.461	209.84	202.772	178.125	164.856	146.268	124.828	93.5157	81.342	61.2913
2011-03-27 01:22:35		0	0	0	0	1.19285	1.10739	3.08183	3.82128	4.44676	8.29897	13.5525	20.8305	21.506	17.9104	27.8239	37.2087	30.5218	32.7631	31.0522	32.9724	29.4834	33.0821	31.5938	29.7576	42.259	50.7702	47.741	52.8554	65.7593	75.8433	90.2256	115.831	137.113	149.738	173.153	188.874	218.073	234.96	215.361	196.585	190.685	185.803	151.773	135.891	105.764	94.7801	71.9298	55.8737
2011-03-27 01:37:35		0	0	0	0	1.19289	2.21484	3.08179	7.64266	5.33599	7.46949	14.4654	11.2929	21.5933	26.3644	40.0125	23.6014	36.2423	41.5859	35.9622	37.4881	27.2426	31.1514	27.1679	23.9249	32.5019	50.9683	48.4718	67.4705	72.3522	72.7673	99.1497	119.045	137.017	158.58	197.644	209.006	221.442	207.692	223.301	208.852	214.88	187.173	159.587	153.868	128.918	101.891	87.0019	65.5103
2011-03-27 01:52:35		0	0	0	2.57576	0	0	7.19122	8.59785	7.29792	6.96788	9.27856	17.6136	16.2545	34.4112	31.4307	27.8548	37.174	42.2006	41.8929	29.4074	32.9849	29.5088	35.3029	34.0019	35.0936	48.9952	55.2022	54.3583	73.4686	85.1404	104.698	121.775	145.178	172.78	193.065	218.936	223.63	225.346	228.538	196.142	208.804	187.229	157.113	139.545	132.264	107.251	84.709	62.8343
2011-03-27 02:07:35		0	0	0	0	2.38562	2.21468	5.13641	2.86583	9.9783	16.4154	15.1012	16.0758	18.8159	23.2812	42.2519	35.891	41.4612	37.201	38.5872	43.9837	39.1343	26.4054	37.1077	39.5561	52.0631	50.4804	56.4705	56.583	61.892	76.0218	103.697	127.101	139.119	196.635	195.699	217.484	213.307	231.08	243.243	234.259	204.393	211.843	178.197	155.311	132.178	109.466	90.2936	61.2458
2011-03-27 02:22:35		1.62792	0	0	0	2.38554	3.32215	6.16407	4.77673	7.11471	14.1088	19.0561	22.6991	22.5346	37.1163	32.5612	28.9463	35.4926	42.1125	44.608	35.7654	40.7285	32.9788	41.1702	40.0189	38.6388	45.6372	56.3843	61.0987	86.0404	89.9603	98.808	115.6	156.002	154.692	180.731	232.394	232.224	247.336	227.093	239.271	209.203	182.013	170.184	166.877	130.433	100.553	78.1196	62.8093
2011-03-27 02:37:35		0	1.50477	1.39054	0	2.38582	4.42949	5.1367	4.7767	8.89375	12.4484	14.4271	28.6729	34.426	30.222	35.5035	30.4684	44.5071	38.7609	31.7171	34.6638	34.2109	33.7353	34.1349	31.3121	42.8295	50.9994	60.1256	65.5997	79.6179	86.1917	126.17	123.937	140.448	159.417	205.871	245.365	236.222	237.442	244.868	224.004	218.367	190.687	182.159	138.894	124.774	107.782	85.849	67.4417
2011-03-27 02:52:35		0	0	0	1.2878	1.19285	5.53696	3.08163	5.7316	9.78272	15.7679	18.1973	23.3924	30.0891	25.111	34.4715	36.3587	37.4804	32.2183	44.7394	39.308	33.376	36.7413	31.5346	38.2647	42.5667	49.6609	69.291	60.7151	86.8135	85.7231	103.337	126.873	155.028	186.599	198.103	215.354	241.811	253.009	247.52	216.913	201.795	187.39	177.524	150.787	122.292	96.1878	88.1846	59.7359
2011-03-27 03:07:35		2.54301	0	0	0	1.19267	4.42926	4.10888	8.59715	10.8875	8.09625	15.0903	20.6603	25.2294	33.1939	31.9517	36.8298	43.1317	41.2407	40.6205	43.0804	36.2856	33.2952	40.7436	44.009	42.566	44.4407	65.9474	67.5782	86.1647	99.6285	102.507	129.924	159.111	175.97	194.992	219.858	234.101	240.899	243.505	232.326	211.418	196.22	169.237	151.4	131.775	114.018	79.7542	60.1247
2011-03-27 03:22:35		1.62785	0	0	0	1.22824	3.28904	6.16285	9.32058	10.4278	12.8761	19.7606	24.6546	18.9721	34.0176	42.4872	35.0843	37.6378	38.3968	43.4708	40.0436	42.6958	33.933	36.1894	40.2314	43.3696	47.5917	64.3699	74.0442	77.7769	93.9859	106.173	126.144	155.274	162.424	202.506	225.028	243.099	267.983	247.596	233.045	212.838	190.913	160.042	146.294	125.006	109.631	74.0071	64.7167
2011-03-27 03:37:35		0	0	0	0	4.83256	3.26487	4.10897	5.50965	10.8779	9.95837	22.0451	26.4906	26.3045	29.7045	34.5526	38.8048	41.6676	48.6244	43.1609	42.8224	34.2978	40.8234	33.9769	42.7801	46.7237	55.1712	61.6423	69.5397	86.6362	112.54	97.3298	138.842	172.608	187.951	216.438	248.772	255.623	238.59	236.925	223.105	242.606	195.12	158.484	147.925	114.64	113.077	90.2699	56.2603
2011-03-27 03:52:35		0	0	0	0	0	2.21464	5.13599	9.55186	10.6708	20.7454	16.6921	24.9636	28.9277	32.7407	32.2862	39.3689	42.8519	38.9519	38.874	40.926	43.3792	44.5388	38.6221	44.8625	46.5942	53.5673	69.2676	68.0083	89.2744	94.3897	106.104	135.697	150.425	190.763	196.444	226.813	242.003	262.542	264.854	249.349	219.271	204.696	199.946	158.776	137.899	107.25	83.8506	65.1337
2011-03-27 04:07:35		0	0	0	1.28764	4.77064	5.53644	7.19016	6.68615	10.6706	15.7656	19.0391	25.9423	23.6777	32.3958	32.8955	39.1792	41.708	43.5551	32.3186	37.1936	36.6221	39.6551	37.4022	40.3119	49.6337	50.4071	59.3154	75.3971	73.0042	92.4506	119.541	139.697	167.528	184.425	247.991	249.547	258.415	258.742	261.192	248.438	221.959	201.945	176.771	156.176	140.651	111.206	88.5051	68.5276
2011-03-27 04:22:35		0	0	0	1.28764	2.38529	0	2.05435	8.59708	9.54804	16.8716	25.0691	22.2046	29.1657	36.3397	45.3282	45.3327	52.1872	39.7048	33.8513	43.542	38.1266	40.675	40.9019	38.692	43.692	49.3484	66.3587	72.841	84.809	108.023	120.968	140.176	183.956	190.118	201.352	229.449	269.085	261.014	244.064	242.861	237.891	218.522	185.142	159.976	141.548	106.998	82.8346	61.2401
2011-03-27 04:37:35		0	0	0	1.2875	1.19285	2.21428	4.10856	3.82077	12.4489	17.1979	17.5986	18.3743	42.6112	36.3442	35.6022	43.5885	48.6147	49.1936	40.4122	48.0282	42.3933	33.5474	37.0596	40.7795	52.3907	52.284	78.0019	80.0279	87.8462	108.336	126.913	130.955	166.611	184.972	204.936	233.862	245.645	268.996	264.265	240.565	217.73	213.428	187.26	159.247	137.398	114.261	83.9022	63.8718
2011-03-27 04:52:35		0	0	0	0	0	3.32186	10.2721	5.73154	14.4327	13.9164	17.3954	27.8285	35.8554	37.576	38.1814	38.6388	50.7247	45.4635	40.6577	41.3045	36.5756	46.083	37.0731	44.8715	58.4875	59.3279	65.124	70.0029	78.5756	94.225	108.559	139.28	168.223	201.244	219.301	225.12	243.013	281.388	266.098	237.502	228.692	205.226	172.476	140.947	125.879	115.577	88.8032	61.2894
2011-03-27 05:07:35		0	0	0	0	4.77071	9.96506	3.08129	5.52455	16.4185	13.0721	18.0962	21.1601	22.7971	35.4186	40.6365	45.1413	40.8676	53.9587	44.7417	35.5106	39.0314	39.0763	38.0506	38.7619	45.2811	62.0625	71.85	74.5869	89.8462	94.4019	126.704	146.991	140.264	182.644	190.461	226.524	238.88	259.129	251.254	235.862	220.719	210.23	180.629	166.484	131.326	105.871	87.8337	61.1987
2011-03-27 05:22:35		0	1.50443	0	1.2876	1.25284	8.80282	6.1626	10.5077	15.1177	16.0488	24.0245	24.2302	25.217	37.5663	41.1433	46.0035	47.6862	37.4292	44.1365	41.0176	36.533	42.3109	42.3756	48.2929	46.3022	57.9862	71.8247	68.8087	77.7971	111.286	131.426	135.301	153.211	197.255	206.935	222.035	246.3	251.298	234.731	241.238	222.867	204.113	187.107	144.141	138.291	109.656	97.0327	69.3038
2011-03-27 05:37:35		1.6279	1.50447	1.39016	0	4.77022	11.0709	7.18958	12.4169	18.6722	14.1046	20.5573	35.3715	41.426	35.1138	39.1215	40.1917	46.551	54.2385	51.9439	47.4045	39.3596	43.7532	45.7744	33.0952	58.6324	53.0183	72.4218	66.3529	80.2846	91.3192	123.254	135.407	161.508	202.54	227.498	261.609	281.569	255.3	260.383	239.796	228.626	199.958	177.923	158.836	132.732	110.345	92.0141	73.9192
2011-03-27 05:52:35		0	0	0	0	0	3.32167	4.32622	9.15619	12.6305	21.303	22.1781	26.9387	31.0348	39.7971	42.849	49.5141	45.5228	46.4545	42.7122	44.3772	35.5782	41.8564	48.4288	39.5288	55.5356	66.0321	69.0224	73.9615	85.6702	109.259	122.366	126.588	168.479	188.844	235.873	237.282	246.887	272.147	258.79	233.662	222.68	201.627	189.217	153.582	122.545	109.473	88.1256	70.4218
2011-03-27 06:07:35		1.62772	0	1.39045	0	4.77048	4.05423	6.75548	11.7521	18.1907	16.5956	35.2622	19.1557	31.5966	36.3029	39.0795	35.0808	48.9446	46.0244	43.6353	36.016	39.4324	36.2202	43.8163	47.4183	48.6038	52.284	67.8346	77.9651	92.5471	97.8359	138.522	135.755	164.129	193.017	222.197	236.446	234.315	268.524	251.096	240.346	211.118	202.867	177.149	157.292	131.438	106.433	88.3096	60.4708
2011-03-27 06:22:35		0	0	1.39042	0	3.57824	3.32176	6.40516	8.37087	11.5601	14.9364	18.8487	33.2413	28.8938	33.7798	40.2782	47.1471	47.3968	52.0843	39.9542	43.8974	37.458	38.658	44.8564	38.1147	50.3038	60.4708	63.299	66.8083	101.75	93.0202	113.783	154.373	161.07	192.348	231.246	234.062	250.713	230.515	256.572	228.083	218.568	215.246	163.446	154.397	128.093	106.295	92.4663	63.8856
2011-03-27 06:37:35		0	0	0	1.28758	0	1.10717	15.6588	12.5048	14.145	24.6901	20.3758	26.8786	27.643	37.274	51.0484	53.3449	50.6574	47.7577	51.5997	43.9923	40.7897	45.8603	48.7128	51.9862	54.3449	51.874	70.324	82.3503	86.901	96.5131	111.915	137.582	176.094	195.747	228.924	245.809	277.3	249.826	248.317	230.301	230.697	192.981	161.937	154.453	138.79	106.011	88.1494	63.9077
2011-03-27 06:52:35		0	0	0.972237	1.67476	1.19275	3.32167	7.18962	5.73054	12.6659	22.2005	24.4335	28.3337	29.2658	38.7385	43.9301	48.6115	47.1256	53.1112	44.9369	48.4756	40.2897	43.3833	37.701	37.9202	48.624	53.4	71.5904	69.4744	85.1006	97.6016	130.757	138.886	160.893	199.796	218.518	223.946	236.456	251.683	252.502	231.645	220.12	180.585	181.512	155.162	125.862	114.525	86.2067	67.3721
2011-03-27 07:07:35		0	0	0	1.28758	1.19263	2.2144	6.16253	12.1992	17.9876	17.98	10.648	23.384	30.7097	35.7061	35.4048	40.9038	55.8314	44.5949	47.5721	38.133	38.6462	43.1596	43.7446	48.7417	58.3186	59.0167	61.7913	82.3407	87.4673	97.1228	125.394	141.132	171.488	174.824	225.904	247.819	245.319	278.914	243.912	224.447	218.688	197.073	189.369	150.266	152.033	112.032	80.5282	65.4571
2011-03-27 07:22:35		1.6279	0	1.39035	1.2876	2.38542	3.32173	6.16292	10.2796	12.6618	13.277	28.9177	18.4176	38.3362	39.3256	46.0035	47.9048	48.4006	58.2865	43.7045	50.3218	34.8221	38.051	48.0183	49.891	53.1269	65.725	69.5987	83.1901	78.333	108.777	134.187	139.377	151.142	195.619	217.702	236.779	240.978	251.548	254.417	235.539	231.148	198.109	203.521	166.428	129.836	108.113	87.8321	64.0054
2011-03-27 07:37:35		0	0	0	0	2.38537	6.64324	1.0271	12.177	18.897	21.5747	22.6036	22.6268	44.7865	41.8907	40.8433	57.8929	59.0503	56.1468	43.6311	48.5641	40.3663	39.9301	49.3301	47.9125	57.6196	61.0846	68.9702	64.0837	82.5776	100.391	128.463	136.803	172.784	218.231	213.083	262.502	257.228	271.07	234.97	227.019	236.224	193.932	172.726	155.952	136.126	107.92	89.199	66.284
2011-03-27 07:52:35		1.62795	0	0	0	0	2.21462	3.29208	12.0068	15.319	18.2396	26.6977	24.9215	37.5686	44.183	35.4346	53.0574	45.3497	39.1231	52.2304	52.1186	46.1439	44.8077	40.9519	38.5721	50.0545	56.2955	62.4327	74.1926	91.8433	106.002	125.883	147.782	177.366	205.891	207.33	246.194	237.694	251.196	234.87	246.809	231.685	213.271	181.02	158.381	128.426	102.621	86.324	65.5356
2011-03-27 08:07:35		1.62779	0	1.39026	0	1.19265	1.10711	14.3788	15.2826	18.6737	13.8476	19.0519	29.1094	33.699	34.0638	53.2231	50.5728	43.0099	56.9946	44.159	38.0054	38.1333	47.8282	39.434	51.4663	54.224	68.1728	67.0381	80.1968	100.685	94.1878	131.983	125.285	163.309	185.629	190.008	235.567	238.938	265.391	229.742	232.624	217.434	200.947	187.893	141.428	138.656	99.933	98.1138	65.4561
2011-03-27 08:22:35		0	1.50467	0	0	2.3856	7.36337	3.44122	3.82051	16.2172	17.7959	23.0619	18.1221	40.1766	49.2936	48.7609	39.2667	50.2513	49.2545	40.6279	42.5205	36.1327	42.3106	42.8208	45.9144	61.9779	59.2744	69.517	81.0692	83.4282	96.033	129.784	140.383	160.136	200.008	208.077	225.322	240.287	245.926	261.749	207.771	214.636	205.208	172.84	146.695	123.626	99.7397	87.7853	60.1699
2011-03-27 08:37:35		0	0	0	0	1.19289	12.181	7.42622	11.0054	17.3282	18.0605	15.6484	30.1302	40.542	38.825	40.7183	56.1654	45.7811	47.976	48.1128	49.1532	42.934	39.0045	51.001	55.091	50.0859	69.3724	78.1215	67.7644	71.6558	99.8984	107.991	141.807	167.484	198.197	208.786	255.905	244.734	256.298	252.155	227.67	228.698	207.059	185.3	157.542	128.235	101.228	74.8103	70.9577
2011-03-27 08:52:35		0	0	1.39054	0	2.38526	1.10723	6.16301	12.4174	15.1168	19.0851	23.5827	30.2057	36.6237	41.3603	53.9724	50.7692	49.4276	52.2375	47.8122	42.3843	47.5074	37.9635	43.017	42.8619	60.3795	65.1952	78.574	75.0253	95.2183	97.3208	133.221	139.792	168.774	169.744	222.72	251.224	231.021	263.319	258.313	239.345	226.428	197.975	188.271	161.002	133.962	109.635	84.2881	68.1522
2011-03-27 09:07:35		0	1.50469	0	0	1.19273	4.42971	6.16324	14.3296	15.1185	21.0222	27.0947	31.1064	28.483	33.0042	40.6163	50.784	54.6865	51.917	45.7939	36.2077	48.0119	42.2824	45.8926	41.1519	54.958	62.3112	66.4516	76.2397	95.9167	114.145	126.157	118.586	165.467	168.231	190.214	235.274	233.62	250.899	226.63	219.78	216.116	205.549	168.439	152.458	121.776	105.123	84.2817	64.6715
2011-03-27 09:22:35		0	1.50487	0	1.28774	2.3857	5.53696	8.67061	8.87654	13.8124	22.7342	38.5279	30.3972	36.7795	46.7404	49.0183	47.0019	57.0147	48.7196	46.2465	51.5244	55.6535	37.7208	47.051	49.6776	56.0093	56.5138	70.7808	86.8779	80.7407	99.8378	114.324	146.843	163.504	186.07	209.828	238.057	235.198	235.369	237.306	237.72	193.347	199.319	178.327	147.059	126.152	97.667	85.2455	68.1285
2011-03-27 09:37:35		1.62804	0	0	0	4.77131	2.21488	8.21897	12.4193	14.631	20.9229	24.3601	30.717	32.8519	41.0179	57.8869	63.1391	50.0667	53.6045	46.9888	35.3439	34.4949	39.9885	43.7087	53.0494	49.1087	51.3779	61.1837	84.5856	83.926	113.862	128.826	133.025	149.549	189.159	182.21	209.792	225.555	224.497	244.543	230.23	210.643	191.969	178.918	155.971	126.022	103.505	80.4756	63.1946
2011-03-27 09:52:35		0	0	2.78145	0	1.19297	4.42997	13.356	12.4203	19.5673	27.892	18.3415	26.1252	34.6772	41.9962	45.5474	50.8929	61.183	53.684	43.9064	46.1247	40.9965	47.1135	55.4026	49.3074	43.9888	60.7474	59.4545	75.1878	85.4244	111.8	120.146	126.629	176.662	190.661	198.842	228.798	262.282	239.411	236.923	227.101	230.357	210.329	171.747	159.297	134.996	99.933	77.1631	60.1638
2011-03-27 10:07:35		0	0	0	3.86327	4.77125	1.10751	4.31474	13.6402	16.6792	25.5345	27.3045	32.1455	40.7093	39.567	54.9997	53.8465	51.4468	55.2962	56.3481	54.5824	47.9673	48.2529	50.3962	47.709	44.1657	50.1846	83.9237	71.2545	91.4205	102.561	122.888	131.905	164.263	175.639	206.566	223.766	229.738	211.887	235.811	221.909	210.427	176.601	178.442	160.33	131.31	96.9708	81.8048	51.9872
2011-03-27 10:22:35		0	0	0	0	0	6.64423	10.4621	14.1542	18.6766	22.9724	26.881	39.9263	30.4195	52.5615	47.2958	44.7824	67.1317	41.7131	48.3099	46.7564	38.7696	38.6856	47.1109	52.6853	46.3346	58.6404	74.5878	68.1929	84.0679	102.996	121.182	145.01	146.669	175.567	189.111	210.92	228.183	237.652	239.746	219.771	205.513	195.667	155.573	147.562	122.408	114.792	79.7478	65.8981
2011-03-27 10:37:35		0	0	0	1.28774	1.19283	4.42978	8.42827	14.1356	21.3457	14.1095	21.2304	30.8832	36.0724	49.074	50.0372	42.5561	54.7846	57.4163	47.3744	42.2776	42.191	38.9381	38.7426	44.0163	57.7503	54.1115	76.8612	86.5663	82.724	106.021	111.549	131.306	156.949	177.648	199.109	217.194	224.193	237.939	219.072	212.266	205.413	178.039	172.496	142.316	123.508	109.446	79.8215	59.7429
2011-03-27 10:52:35		0	0	0	2.57574	3.56048	5.55516	6.16452	11.4658	10.8195	15.5274	26.6861	28.3152	42.7859	40.5554	46.4949	45.5843	51.0478	48.2304	50.8058	47.0269	47.5407	32.3446	35.4612	36.2654	43.8285	53.5526	64.6269	75.1705	87.1526	94.7853	116.184	138.972	172.157	171.248	221.278	232.392	238.794	222.782	219.074	236.496	199.275	191.529	170.647	159.509	129.409	105.1	91.3545	63.2686
2011-03-27 11:07:35		0	0	0	1.28792	1.19297	5.53728	4.10978	11.4654	13.5099	17.5052	21.795	22.8317	38.3048	44.3202	51.5763	41.9804	42.6042	44.567	43.8087	40.4737	42.9016	39.4939	45.7112	47.1596	44.5324	59.6353	69.6446	76.5814	82.9638	97.1462	119.501	132.838	162.835	192.424	190.936	212.394	235.581	225.838	217.911	227.656	201.633	190.795	164.762	147.931	121.855	111.188	79.0266	56.3013
2011-03-27 11:22:35		0	0	0	1.28788	0	4.43022	6.16487	17.1986	14.2315	20.096	24.917	34.5904	38.1231	40.5263	45.1702	44.9721	47.3737	40.1038	44.0458	46.7038	39.0631	42.0756	43.5038	41.0314	55.5631	63.0038	71.0244	68.5731	75.8849	89.9282	110.573	129.776	150.875	155.831	191.072	183.578	217.462	207.342	213.263	199.768	167.147	175.136	146.032	134.613	126.12	93.384	74.5571	53.2561
2011-03-27 11:37:35		1.62822	1.50507	1.39082	0	1.19309	3.32269	7.19186	16.5897	18.5381	22.4213	30.4561	28.9651	53.7103	53.1128	40.9849	34.7827	46.3054	59.1776	43.3436	37.7311	37.6221	49.683	33.3673	41.1506	58.6763	51.7205	62.8122	73.8272	78.4179	94.3391	112.3	122.412	155.429	169.647	182.562	196.234	205.022	207.079	207.76	187.907	175.393	164.421	156.899	123.019	117.33	92.2119	67.2667	65.1019
2011-03-27 11:52:35		1.62809	0	0	1.28788	0	0	9.24654	11.1995	23.3728	24.8996	24.1619	33.9	31.3778	52.0567	51.9333	57.5577	46.2769	48.7381	42.7744	43.9949	39.7231	41.7154	47.4212	51.3574	49.1183	50.5721	74.6734	73.8388	80.6218	102.284	125.114	136.679	150.178	171.334	210.377	217.268	235.316	224.76	211.759	188.421	185.601	168.227	165.555	142.313	119.663	112.999	73.324	61.6974
2011-03-27 12:07:35		0	0	2.78171	0	1.19301	2.21524	4.10926	15.9577	20.7234	10.7902	23.5695	33.3619	33.3622	37.0647	47.7484	41.5365	34.3689	51.9554	45.8859	35.4372	37.2856	42.9029	39.6686	42.509	52.0724	58.441	67.8173	77.7792	88.7096	93.9644	125.611	124.402	155.625	170.681	187.486	209.824	222.234	229.305	208.468	205.213	192.318	172.146	164.71	134.307	134.149	96.8006	86.0308	60.9122
2011-03-27 12:22:35		1.62817	0	0	0	2.38606	7.3217	6.5649	13.3767	18.6793	14.9409	24.2931	37.8587	36.0378	57.3208	50.9538	46.1612	55.3865	51.3974	55.5513	42.3173	40.9317	41.6567	42.7205	46.4561	42.5897	49.3548	74.7891	75.4772	83.717	101.433	112.921	126.012	149.938	146.879	170.266	186.02	213.341	205.02	190.479	186.893	192.162	174	139.313	146.827	107.494	98.1308	75.2929	58.9811
2011-03-27 12:37:35		0	0	0	0	0	5.53804	3.24567	13.8905	20.9042	19.756	28.8966	34.3885	36.7792	44.7667	43.817	50.4497	45.7904	46.0244	38.3494	39.301	37.8971	41.3324	40.8061	41.5333	52.2234	59.8612	70.9821	72.9054	88.6647	90.8551	103.617	149.275	134.235	170.711	187.204	201.242	221.787	203.956	220.994	212.714	182.247	176.879	154.429	144.209	121.646	93.4795	77.8946	60.4955
2011-03-27 12:52:35		3.25644	0	0	0	0	1.10747	5.13689	16.9205	21.7512	22.2754	23.497	36.1215	34.274	31.5004	45.3179	48.0561	60.667	47.9144	47.8032	41.3436	39.1253	32.7138	45.284	47.7208	45.4923	58.6436	71.4542	78.2074	89.8686	94.5571	115.277	130.118	144.399	174.547	166.424	209.565	213.566	192.548	213.572	207.045	190.311	172.107	149.423	153.069	115.419	110.085	67.2833	61.3087
2011-03-27 13:07:35		0	3.01029	0	1.28814	11.9309	1.10761	9.24756	16.2442	17.9524	19.9189	24.0695	26.867	47.5587	46.4548	50.8843	51.4599	52.5776	46.7119	51.2933	45.3856	38.2583	37.0984	43.7712	50.9346	41.767	60.65	68.7016	74.25	96.1106	76.8433	111.273	120.561	155.597	157.242	191.456	196.36	188.928	198.78	198.626	203.516	167.544	163.996	156.767	134.513	117.664	105.206	86.8295	61.2647
2011-03-27 13:22:35		0	0	0	2.57572	2.386	1.10751	3.08219	12.1431	9.15372	16.6012	24.1137	29.1484	39.934	32.9292	45.4788	59.6388	57.8468	44.3202	55.2128	39.2955	46.559	32.7647	40.2663	52.8631	46.634	60.425	85.8292	85.0064	84.3763	96.8263	119.98	131.226	147.286	172.676	190.541	201.16	227.274	223.227	217.706	222.644	199.381	198.902	174.637	153.281	110.471	110.936	77.7577	65.5888
2011-03-27 13:37:35		0	0	0	0.447615	3.16426	5.53766	7.19234	15.931	18.249	17.4333	27.1661	29.9694	39.4532	39.3362	50.666	45.4468	56.1529	50.7122	46.0112	48.9224	45.066	34.7811	38.6596	44.0772	45.8058	56.6949	60.5205	74.9426	86.2269	99.684	108.863	137.055	143.213	156.178	192.12	201.044	210.14	204.249	212.186	202.616	194.816	180.298	153.976	138.888	129.233	104.405	86.8471	58.6686
2011-03-27 13:52:35		1.62859	0	1.39115	0	1.19343	2.21572	3.08309	7.0351	23.0589	20.1759	26.7939	35.1205	38.5144	52.6885	67.5548	51.2381	60.2558	53.0567	44.4324	42.3115	42.5337	33.7875	45.5054	35.983	52.3881	60.4907	71.2035	79.3635	88.249	106.205	121.713	133.454	145.577	171.693	179.235	197.418	208.89	217.019	218.089	189.032	200.603	174.483	153.107	125.455	104.732	98.0865	79.7333	71.8048
2011-03-27 14:07:35		0	0	0	1.28824	0	2.21563	4.11083	8.60138	18.1374	22.926	20.3496	22.5255	42.9913	37.9196	39.766	52.5708	47.3997	52.3756	44.3038	33.7936	38.6981	36.7763	35.1494	44.6032	56.1792	58.9587	75.2167	86.625	77.2978	97.2038	126.026	150.05	160.835	164.908	190.855	202.244	202.502	236.182	213.696	218.013	190.202	186.37	184.329	136.42	142.961	102.993	87.301	67.1766
2011-03-27 14:22:35		0	0	0	1.28824	0	3.91926	11.7802	8.60237	12.5328	19.8644	32.5782	30.1408	40.1465	36.2272	40.317	54.1827	49.9458	45.4484	44.6449	46.4071	38.1551	31.5627	44.4288	57.6423	41.3314	54.0971	77.6385	71.2106	92.8051	99.4067	128.46	132.031	142.997	186.202	197.27	219	212.21	240.913	225.846	232.969	191.104	203.626	168.704	161.204	127.833	104.419	87.099	73.7865
2011-03-27 14:37:35		0	1.50557	0	0	0	2.21593	5.13923	4.38997	15.4891	15.3692	28.511	22.7168	34.3657	51.1471	58.0247	50.6038	48.0119	42.0881	54.2513	44.5333	39.1215	30.9617	39.0006	39.9314	42.7401	60.342	70.7647	59.5231	92.4051	102.078	118.748	134.888	154.76	192.814	197.822	237.097	229.022	246.677	257.015	218.532	208.125	213.363	179.924	154.088	120.965	102.59	80.0766	66.4744
2011-03-27 14:52:35		0	0	0	1.28844	3.50795	1.17522	5.13929	14.9118	17.3384	16.121	29.3203	37.3798	38.5093	39.4228	54.4535	48.3641	48.167	48.1301	44.451	43.4744	33.8965	42.5817	38.1933	50.8397	51.9176	58.4013	56.0103	71.5272	94.166	100.249	107.471	128.012	159.257	175.379	213.069	218.81	215.076	233.584	218.227	219.652	200.354	191.08	181.11	152.454	119.405	98.1708	84.159	64.4865
2011-03-27 15:07:35		1.62885	0	0	0	0	3.32378	7.19455	6.69077	12.5312	15.3143	15.207	26.1855	40.9054	41.1923	60.0196	50.4292	52.4734	48.0699	53.4385	43.5718	30.4038	42.2891	37.1984	42.8702	47.1263	63.4224	76.4769	72.0494	77.358	98.5022	122.123	132.955	152.312	170.256	185.156	215.405	200.409	222.019	209.762	225.739	195.287	185.833	158.738	139.571	127.713	105.433	74.9179	63.2862
2011-03-27 15:22:35		0	0	0	0	2.32626	7.81144	5.13872	9.55712	17.9881	16.8431	26.8833	36.7237	45.4035	41.4651	49.9154	52.1862	50.9817	45.7833	51.783	44.0526	43.3042	32.5218	42.2631	46.2208	46.3436	55.7186	67.7131	83.3244	83.8022	96.9667	106.753	130.018	151.182	149.798	181.024	198.848	209.802	214.834	223.349	202.825	189.649	181.052	166.192	140.923	108.851	104.164	81.1109	68.3215
2011-03-27 15:37:35		0	0	0	0	0	7.75494	4.11099	5.73449	18.7582	25.6697	25.0054	34.0862	40.0093	51.9045	62.026	52.4692	51.5029	43.4933	39.6119	32.6115	43.742	40.9301	44.826	42.0295	50.8853	61.1962	76.9003	62.6926	75.6337	105.491	124.179	146.599	156.358	167.65	191.214	210.237	230.076	208.538	226.827	218.832	189.167	166.825	167.738	148.772	126.459	100.452	78.8881	57.0769
2011-03-27 15:52:35		0	0	0	0	0	1.10793	7.19487	10.1565	13.6798	24.0799	23.8856	33.8151	34.4167	46.392	50.0285	64.542	58.3192	49.6881	43.4279	43.3022	40.2144	42.7776	43.0567	39.8869	48.8683	56.4324	62.7401	65.1545	82.9538	88.0901	114.482	126.67	140.579	165.24	181.454	205.529	209.916	215.695	222.969	196.839	196.769	159.531	159.247	148.468	122.24	86.7824	78.9891	67.9981
2011-03-27 16:07:35		0	0	0	0.389644	3.21904	2.21617	13.3611	10.1276	16.377	28.2316	26.2678	40.6135	45.6808	40.8038	56.058	59.1788	47.2702	47.849	52.2865	40.909	34.9176	33.325	39.6615	51.5388	60.4029	67.6221	76.8327	78.2381	88.3064	89.7436	120.279	126.47	150.443	142.963	172.785	191.48	200.026	212.093	205.553	195.242	182.949	174.283	159.858	150.144	127.983	87.4429	82.5638	63.1926
2011-03-27 16:22:35		1.62887	0	0	0	0	4.43228	7.19401	13.3818	11.6589	23.1639	22.6302	26.389	39.7792	50.6641	51.3721	56.8304	56.7231	47.3401	45.4734	41.1724	38.5577	44.3978	49.7394	43.3054	47.3343	60.7856	58.6071	76.4679	76.9679	108.82	121.947	145.346	147.189	155.783	184.744	193.213	212.556	200.599	212.764	210.765	200.088	186.524	165.23	142.027	128.518	99.3083	78.4667	55.2625
2011-03-27 16:37:35		0	0	0	1.28846	1.19353	1.10803	6.1666	9.82381	17.6085	25.2734	23.5759	36.874	43.5699	53.1981	53.8455	65.0974	48.9077	58.2231	43.5487	41.8558	37.192	38.666	43.4897	40.6622	44.7269	53.5901	61.5811	73.9394	78.7224	106.86	117.194	131.957	140.705	150.851	178.96	181.667	209.415	211.442	190.871	218.434	178.556	185.295	151.577	153.273	128.091	93.4538	83.1003	62.2455
2011-03-27 16:52:35		0	0	0	1.2883	1.19337	2.21609	4.11128	9.55837	12.4575	24.514	29.857	33.9071	38.6792	49.0071	42.2497	49.3779	46.0304	43.5125	47.3458	37.0788	37.9532	38.6942	43.6603	43.8022	63.3167	58.1215	56.1138	75.0728	87.2952	93.9881	115.184	125.827	151.496	151.901	168.864	187.798	200.363	202.436	208.317	198.387	194.215	178.642	150.805	154.245	117.04	97.7285	74.6497	62.2144
2011-03-27 17:07:35		0	0	1.39145	0	1.19335	5.53952	13.3612	10.514	17.7972	17.4119	31.2484	26.1496	35.8109	39.7205	48.0317	40.1327	41.9474	43.3099	42.6173	31.1614	36.375	45.9564	50.5109	54.5946	46.5106	65.7856	60.9676	74.6359	85.274	94.7394	108.276	130.282	143.021	174.393	185.032	195.112	197.814	198.452	202.748	190.218	188.438	158.76	178.285	132.53	121.398	92.8388	84.0429	53.0827
2011-03-27 17:22:35		0	0	0	1.28824	2.32071	2.27743	10.278	6.69035	17.7954	18.6899	25.2388	35.0452	40.3529	39.0141	45.6548	39.6308	54.7436	46.458	45.8147	41.3843	46.0099	37.7513	44.3673	41.7744	39.276	64.159	68.6952	72.6151	80.0663	79.7699	130.979	129.636	149.437	150.855	181.334	207.522	192.238	214.633	213.021	208.632	176.827	174.922	165.388	150.693	126.955	103.7	82.4785	60.0837
2011-03-27 17:37:35		0	0	0	1.28834	2.38688	3.32385	7.41317	7.44272	18.7827	17.346	22.2618	39.5676	38.1048	51.8679	65.2054	61.7013	44.2429	42.2904	42.2603	37.6247	40.3885	36.2705	39.3224	38.716	48.8362	52.3984	62.5253	73.1551	95.6253	94.0452	114.056	133.764	143.856	159.778	185.821	188.979	209.407	212.003	226.052	191.671	197.101	165.587	160.311	134.205	116.853	93.4545	76.7465	66.3253
2011-03-27 17:52:35		0	0	0	1.2882	4.77308	3.32343	2.05551	16.8416	14.7559	27.229	22.5627	30.6178	37.3522	47.0378	51.4628	56.4481	53.6622	50.4234	50.5728	44.5006	37.0715	39.8122	36.3904	47.7112	57.2747	66.1532	68.5349	77.2359	74.5006	99.2885	106.043	128.391	146.404	170.661	187.989	190.779	213.794	241.795	211.641	212.173	188.413	183.882	155.829	130.012	122.873	102.304	87.2288	58.7205
2011-03-27 18:07:35		1.62869	0	0	1.28842	2.38678	0	8.22244	11.4695	11.6462	24.4183	22.1937	29.3795	40.1526	42.3615	47.8888	52.3808	42.0321	49.733	38.5718	42.351	45.8122	39.659	45.05	40.1449	53.3388	61.8506	61.1003	78.2099	82.5715	97.2715	93.3135	145.229	144.185	166.957	186.635	194.397	198.894	213.678	210.777	185.863	183.049	171.889	160.03	136.729	123.377	104.78	83.3721	62.0644
2011-03-27 18:22:35		0	0	0	0	0	2.21604	4.11157	12.4268	16.1422	18.9838	27.3137	44.9433	42.2801	49.5196	61.3545	54.4987	54.4449	38.216	39.7904	37.8199	44.7843	38.1522	44.2676	45.216	46.2875	52.0064	65.409	59.8474	70.8199	107.74	121.909	112.798	142.059	176.162	174.654	210.411	212.041	214.535	202.887	190.136	203.516	173.323	144.359	123.541	127.35	106.733	88.4032	55.5535
2011-03-27 18:37:35		1.62895	1.50573	0	0	0	2.21609	6.16696	12.6573	18.5332	16.5906	21.8575	28.2163	35.0526	47.459	57.1606	53.0753	55.7506	50.9897	39.8821	45.1718	28.654	39.9734	38.6728	56.8224	59.4721	72.6904	77.175	75.5712	82.5407	99.4837	93.308	116.656	146.883	154.67	193.964	205.755	221.849	204.824	235.803	199.527	174.996	159.285	143.325	138.277	110.186	80.9429	84.0365	64.949
2011-03-27 18:52:35		0	0	0	0	1.12324	5.60487	6.16676	6.69026	14.3483	24.8009	29.6971	30.5992	43.6792	43.7256	47.6811	49.5933	50.5756	44.6622	38.6045	39.1535	39.4266	36.8609	42.2817	47.5394	51.1462	68.0997	66.4571	71.9779	86.8907	107.388	108.804	121.554	137.811	172.516	181.579	191.021	216.246	198.836	202.404	185.915	205.675	182.107	162.42	143.806	114.845	98.1798	74.8106	56.434
2011-03-27 19:07:35		0	0	0	1.28836	2.3869	2.8097	3.56045	11.4698	16.9062	23.6697	19.0791	37.1074	40.5676	47.7058	53.2016	52.1362	50.6465	49.1022	32.7603	35.349	41.1353	36.7247	37.3769	45.3513	49.5599	55.6436	69.8426	72.9526	78.3317	95.3657	117.622	121.895	142.207	190.393	187.594	193.439	217.236	241.412	215.707	204.295	205.383	198.195	170.371	146.833	121.428	108.921	75.2087	56.1625
2011-03-27 19:22:35		0	0	0	0	1.19315	3.32375	4.11099	9.55715	8.99404	24.4259	33.8808	24.0843	32.5058	41.1772	41.3189	54.2824	52.734	55.4228	45.1686	39.609	38.6026	38.2936	52.1901	42.1776	58.5013	50.7897	77.8814	76.0263	92.451	86.5228	122.043	131.393	140.006	180.701	168.476	202.013	212.779	223.842	208.504	183.103	198.486	163.982	160.921	152.915	119.122	103.487	71.6247	63.0103
2011-03-27 19:37:35		1.62854	0	1.39119	0	1.19325	0	3.08277	6.68952	11.5658	25.3638	25.2021	40.2304	40.5878	48.2484	51.5849	54.8853	47.3397	64.6638	41.6756	33.9561	39.5138	45.0433	42.8837	41.6285	57.1917	50.2955	65.408	87.55	76.9045	87.3897	111.172	138.345	139.778	155.05	190.909	203.434	211.801	208.888	213.912	189.768	189.093	187.162	164.481	148.694	132.131	105.845	86.9519	57.9856
2011-03-27 19:52:35		0	1.50545	0	2.57592	2.38654	3.32324	5.13833	9.21474	12.1219	12.6548	44.6304	37.4814	44.776	51.3196	47.909	60.9859	45.6423	47.7708	38.8577	39.8391	47.1013	42.3984	46.5186	47.934	55.617	57.1058	58.4516	71.4494	89.7032	97.3035	121.064	143.297	160.335	176.865	199.531	207.833	222.804	208.189	216.076	188.089	187.75	175.156	167.396	149.509	124.309	103.94	81.4583	52.1125
2011-03-27 20:07:35		0	0	1.39099	0	1.1626	3.35144	1.18415	11.3213	8.00622	22.4131	20.2971	24.9477	33.2766	39.1199	44.7237	48.9141	48.7689	53.2522	42.1702	47.1929	40.2827	42.8837	45.9686	45.5173	58.4545	54.6176	77.6013	69.3641	98.9577	97.0045	114.211	139.375	137.414	178.109	185.957	213.572	218.237	227.971	232.83	202.748	204.067	194.109	159.275	138.145	112.273	99.0433	90.809	57.426
2011-03-27 20:22:35		1.62821	0	0	1.28808	1.19317	4.43064	6.16538	10.5113	6.51096	19.2993	18.1824	29.5198	43.0256	40.5276	45.9663	63.5756	53.9478	47.6237	48.0881	40.0067	44.5862	43.2926	32.199	43.2295	58.6619	60.4029	61.1638	80.0301	91.8228	101.841	102.589	140.709	143.299	174.135	195.385	214.778	224.189	225.252	230.637	221.621	214.042	193.534	159.625	131.252	122.602	100.958	82.9904	71.3263
2011-03-27 20:37:35		0	3.01082	0	1.28808	0	2.21542	1.02744	5.73337	15.1228	17.1329	26.1058	26.9016	39.9465	40.5487	42.3413	48.1551	57.7321	46.5795	55.4564	37.8051	40.3728	44.2833	37.9503	47.4554	47.5141	62.7984	68.8506	75.2718	79.649	93.6317	118.081	135.924	175.298	162.452	195.627	221.791	240.312	231.793	212.268	235.878	203.087	194.379	180.854	158.971	132.947	99.458	81.0208	71.8705
2011-03-27 20:52:35		1.62835	0	0	0	0	2.21514	3.08217	15.2876	15.1213	14.6033	19.9231	32.8904	37.3199	50.9481	45.3125	49.1692	47.0247	57.1228	40.025	45.916	42.2131	35.4513	44.7561	49.8244	49.7705	60.0462	71.7167	75.1519	87.6231	107.481	116.299	123.862	170.393	192.073	194.892	232.84	255.316	256.587	255.228	220.965	230.931	197.472	189.958	156.34	137.436	110.192	94.3077	60.1237
2011-03-27 21:07:35		0	1.50501	0	0	0	1.10765	2.05483	5.73279	10.6736	19.0907	19.5789	32.3635	38.0285	37.1955	50.0439	49.3401	52.1663	42.7311	43.9032	38.1401	36.083	32.6907	43.533	42.8859	59.7413	58.2071	73.083	86.7894	80.6683	101.761	120.803	139.884	160.417	196.36	228.818	256.036	241.851	262.949	253.169	250.008	234.98	200.615	193.73	156.214	143.492	128.524	94.5458	62.1365
2011-03-27 21:22:35		0	0	1.39082	0	0	0	4.10939	3.82189	10.6735	9.13026	18.8241	31.1244	28.6687	38.4897	43.6337	52.9436	52.2702	41.4891	38.858	49.8763	37.6035	38.8186	41.8042	39.4519	57.5747	60.0939	67.5715	74.4747	81.3631	100.72	135.773	150.621	161.971	184.477	218.53	226.186	246.614	241.639	246.604	239.95	229.826	188.888	177.684	156.29	122.294	112.317	83.926	67.842
2011-03-27 21:37:35		0	1.50515	0	0	2.38582	3.3225	6.33327	6.53112	13.3411	13.7918	15.2486	34.7808	46.6003	40.3115	63.7151	52.0106	48.7016	46.6497	40.2699	41.8074	45.5747	45.1308	42.5429	41.8433	52.7894	60.9333	63.3952	72.4304	89.6071	109.703	116.207	129.671	164.479	170.295	193.512	202.63	230.577	222.432	232.306	209.739	216.268	192.787	162.4	147.017	134.826	107.502	91.133	69.4074
2011-03-27 21:52:35		1.62809	0	1.39062	0	0	1.10735	4.10917	8.08904	12.2364	17.4871	16.1789	39.7292	39.5314	42.5965	51.4	57.8365	45.4224	49.7686	48.5724	43.0324	31.0771	39.7064	37.9093	44.7282	54.6901	64.6542	57.1984	89.1471	86.8753	109.987	125.092	135.068	143.552	159.527	183.56	220.555	239.371	257.726	232.949	229.746	204.253	204.529	173.425	149.509	119.573	115.509	79.3151	73.6147
2011-03-27 22:07:35		0	0	0	0	1.19297	4.42965	4.29208	14.866	11.0844	18.9213	17.3056	28.9832	43.7968	48.0135	48.0808	47.2365	51.8949	40.2667	46.1173	41.5538	36.2526	33.466	36.3167	37.2317	53.6304	52.9962	76.7263	75.6846	92.2577	104.647	122.923	138.446	139.699	183.55	196.556	213.362	237.854	232.392	231	212.54	200.134	196.609	171.488	150.915	125.695	105.015	85.7901	67.0942
2011-03-27 22:22:35		0	0	0	1.28766	1.19263	2.92207	3.69151	7.42006	10.6713	15.7672	15.0281	33.8378	30.6569	47.7997	46.6446	47.0654	49.8269	43.6484	38.5202	50.633	40.9288	41.9449	41.5429	45.174	46.3433	53.8321	60.8439	72.9939	79.1481	97.7375	120.711	137.262	148.572	183.594	207.516	209.603	226.929	245.647	224.251	231.827	192.875	185.865	169.675	155.745	128.458	113.827	102.632	66.3141
2011-03-27 22:37:35		0	1.50481	0	0	2.38536	4.02705	2.6081	6.51897	9.99843	20.5455	15.6872	30.741	34.333	44.7654	39.7048	52.6776	45.458	49.6061	44.4487	43.6311	42.3654	42.6574	45.3487	49.9926	44.1859	64.0205	72.7346	70.0311	84.0965	101.722	122.292	136.029	156.851	184.906	187.019	233.085	243.349	231.907	219.788	216.795	217.74	185.781	170.739	154.9	142.432	111.519	93.9327	68.2673
2011-03-27 22:52:35		0	1.50453	0	0.484135	3.12977	3.32192	4.31772	6.49199	7.11372	14.1063	20.4315	28.8203	37.5119	36.8731	54.3811	44.2875	51.4545	52.4433	40.8526	43.1756	43.4035	36.949	40.2423	53.1077	50.5353	59.376	70.0003	73.1157	88.4343	117.5	104.683	142.935	164.762	202.896	214.671	222.983	261.17	251.096	230.623	251.609	218.353	211.969	192.973	160.869	128.052	108.878	92.5686	65.1542
2011-03-27 23:07:35		0	0	0	1.28766	0	1.10723	2.29605	2.64101	7.11446	18.8083	15.9716	23.5435	37.9772	41.0583	39.5663	50.5029	46.1353	43.599	53.3442	34.2375	37.2782	40.3663	41.6885	45.841	55.499	55.6872	63.2231	77.1276	74.7936	99.3321	110.936	136.532	167.252	208.484	229.016	235.407	231.54	259.133	265.912	243.886	215.409	202.207	178.193	165.312	145.838	104.607	99.8458	77.4308
2011-03-27 23:22:35		0	0	0	0	0	5.5366	1.0273	5.73154	8.00353	12.1795	19.3173	30.113	30.4585	42.8337	52.2696	36.6731	52.7913	53.3747	45.5779	35.267	40.3314	37.9872	35.7266	45.066	48.8151	58.833	69.1054	77.9122	80.6208	97.3429	126.46	143.257	153.471	194.984	224.04	247.718	270.441	274.069	277.654	260.298	227.708	235.631	172.642	162.001	140.357	111.056	88.1878	78.1631
2011-03-27 23:37:35		0	0	0	0	2.38562	3.32192	4.10872	6.68667	10.8821	15.3128	22.9077	24.9515	32.5375	47.3433	48.3962	52.3846	37.7263	50.3212	48.0638	34.5372	32.3356	37.7833	39.2087	49.5929	56.3192	66.6891	68.1708	63.6792	88.3292	116.641	117.414	144.215	183.011	198.103	239.459	254.938	239.299	269.177	264.547	263.538	228.243	230.417	197.146	176.146	137.601	117.355	98.7558	75.9029
2011-03-27 23:52:35		0	0	0.948196	0.409635	0	2.21424	3.08135	5.73109	9.12135	17.2117	23.5306	17.3145	30.2154	39.4545	44.3266	50.5558	51.0378	48.4686	51.9064	43.6654	38.2753	40.9314	40.9545	45.2311	53.9212	54.9314	65.5413	72.974	89.7933	99.3881	116.657	132.552	167.063	194.075	216.474	250.016	254.419	279.926	265.156	259.77	239.85	204.794	187.817	165.597	138.988	103.061	90.309	63.2135
2011-03-28 00:07:35		0	0	0	2.5755	0	2.21474	1.02732	0.955327	6.22426	16.2992	19.7459	23.637	39.0144	35.7638	43.5506	62.5798	39.8022	47.4378	40.7038	47.7022	38.2952	37.2167	40.2978	42.966	52.4772	49.8279	67.6253	71.6365	86.7343	98.0196	120.701	144.966	160.385	183.157	212.328	233.996	264.235	235.204	271.847	250.126	225.827	220.182	191.06	170.781	130.757	104.583	91.8215	76.2321
2011-03-28 00:22:35		0	0	0	0	3.57788	2.21444	3.08147	7.64196	16.0061	16.3723	29.1336	27.0946	45.3016	53.0051	42.3715	57.241	43.0891	54.649	48.5394	36.5266	39.9077	45.5154	45.5317	42.8593	50.7872	57.1849	72.7567	67.0571	84.8442	92.5689	98.6952	108.72	141.418	149.824	185.473	189.976	223.686	232.021	229.024	222.141	201.212	178.702	166.096	132.408	123.866	103.539	89.4109	61.95
2011-03-28 00:37:35		0	0	0	0	0	1.10735	5.13631	5.46054	11.9774	25.5781	31.8966	33.0821	43.2458	47.2769	58.4814	59.2455	41.4612	51.5776	46.1798	44.9215	40.7676	38.1564	46.6083	41.308	46.6013	66.1356	61.374	81.9532	86.192	92.3022	93.9718	114.577	128.396	144.143	177.154	186.873	175.511	185.769	195.304	185.982	174.539	175.553	168.155	134.371	118.618	104.047	69.8853	57.4042
2011-03-28 00:52:35		1.62843	0	0	2.57564	3.57894	1.10769	4.10974	6.68888	13.3419	17.4304	22.5729	27.6256	41.2109	48.9949	39.3051	53.424	55.8779	56.1676	44.0516	45.4157	36.7269	37.4119	41.4647	50.5388	51.1718	67.8962	80.5471	77.3192	78.276	93.2936	99.5641	111.897	137.714	152.851	150.845	197.007	189.609	216.458	195.22	195.457	179.848	165.018	142.384	145.545	125.581	99.9907	87.8202	62.5096
2011-03-28 01:07:35		0	0	0	0	0	0	6.16561	10.5117	15.2487	21.147	20.6155	31.4571	36.4821	58.1282	46.4413	54.3321	56.3128	41.5894	43.0612	40.5654	44.9939	38.4987	50.826	44.8122	64.4997	62.9311	81.2638	66.7952	85.8353	85.3513	113.285	127.316	133.834	152.388	184.391	181.142	194.038	188.598	200.046	202.087	180.585	172.326	143.65	139.507	116.653	86.3359	83.7763	66.3362
2011-03-28 01:22:35		1.62871	0	0	0	0	4.43125	5.13824	6.33353	14.5675	17.8722	23.6701	27.2636	39.1564	49.6494	49.7429	47.6064	57.3381	54.8099	44.9859	35.0074	41.3237	40.1362	38.4212	39.8679	52.4112	60.2821	57.991	78.2423	97.1314	91.3869	108.138	129.729	140.108	139.956	183.572	187.901	207.165	220.09	201.695	207.252	195.136	177.774	142.322	116.458	125.747	102.763	82.1827	65.5426
2011-03-28 01:37:35		0	0	0	0	2.38676	2.21571	7.19426	4.77875	16.9974	16.9669	22.9749	32.7747	40.7551	51.9292	59.7147	49.1897	48.1827	57.1763	37.7554	41.5933	40.2321	38.5933	33.6359	45.1151	51.9362	61.8606	63.2446	78.1683	89.849	106.429	97.9221	115.314	145.679	157.438	173.011	207.53	231.959	213.404	221.725	214.012	195.202	175.224	157.965	136.571	104.813	105.465	91.9558	79.1151
2011-03-28 01:52:35		0	0	0	0	0	4.43199	4.23228	14.2231	16.0162	15.7901	28.0896	27.9389	38.7981	55.5917	40.9314	53.0388	50.3827	53.9779	51.2138	37.9279	41.0218	42.7952	44.949	49.976	50.5554	64.3391	76.7913	72.1535	101.117	111.926	106.943	128.071	151.801	180.938	181.2	227.354	224.211	232.83	237.835	221.084	196.082	165.799	164.285	145.675	125.671	97.9346	85.8288	75.2936
2011-03-28 02:07:35		0	0	0	0	1.19353	5.03442	6.63622	3.43208	11.0426	19.9293	22.4153	24.1875	39.4391	49.8676	46.5936	53.9471	49.3545	35.4891	46.0926	42.5997	43.9058	41.0853	38.8635	49.3978	58.3298	58.5061	72.3215	71.8455	80.9571	108.915	100.673	121.468	148.059	166.837	184.111	204.728	230.192	226.35	238.289	224.744	216.701	174.689	158.479	147.412	130.587	95.3179	83.8952	62.2471
2011-03-28 02:22:35		1.62891	0	1.39157	0	0	4.43199	3.15351	8.53785	17.8831	15.2795	22.1751	26.5543	39.2571	47.2753	38.7074	54.8939	47.6753	52.5179	46.9635	38.492	37.9843	38.583	36.6378	40.816	49.9426	68.633	74.0429	81.583	70.8054	106.943	121.55	122.837	151.39	159.898	189.453	218.259	204.712	221.619	213.237	216.046	197.17	179.513	168.9	148.191	115.38	105.473	84.1381	67.4804
2011-03-28 02:37:35		0	0	0	0	2.38704	1.10807	6.16756	6.69154	5.38481	8.26173	31.8538	34.9141	43.3128	47.5776	45.9811	41.8311	45.5106	45.7554	45.2353	38.9603	39.8487	41.9756	44.7535	49.7147	48.8785	64.6894	71.5321	79.9449	91.7288	97.2029	101.122	126.117	132.674	146.905	175.769	199.465	196.354	219.76	226.4	201.506	204.792	184.447	177.119	144.121	120.831	104.771	81.4702	60.6481
2011-03-28 02:52:35		1.62912	0	0	0	1.19367	3.32426	4.11176	8.19715	10.2681	17.345	25.3051	32.0176	46.1731	41.3929	44.1429	61.0824	42.6692	46.1215	51.0551	45.4298	44.2311	49.626	39.7542	45.6856	50.6321	69.5365	71.5965	71.3304	80.9696	101.242	90.6006	115.244	137.105	159.739	177.891	197.54	223.762	214.347	219.046	211.553	201.316	187.57	160.194	130.403	123.169	90.3635	83.7087	61.9301
2011-03-28 03:07:35		0	1.50585	0	1.65242	2.0503	6.64904	4.16272	16.2043	14.2396	19.4796	29.0912	35.7369	40.2494	51.5234	53.9657	59.1673	53.1497	46.0574	40.6756	46.3728	42.8253	33.4737	36.2881	48.6151	49.6679	56.3462	63.0734	61.6369	74.7359	81.601	97.5997	112.703	131.596	159.329	167.666	186.913	188.47	207.105	203.001	191.43	182.863	178.84	147.742	141.665	116.559	106.706	85.3997	66.3853
2011-03-28 03:22:35		0	0	0	0	1.19357	4.43298	1.028	7.64804	11.5872	26.9525	29.0807	39.5933	54.4663	50.7042	55.6058	55.7965	56.8462	52.1337	39.6071	44.2362	46.5564	48.5955	52.3103	46.7016	54.308	49.7705	57.0234	62.7785	77.124	81.0558	85.9138	111.88	137.448	133.283	162.196	179.069	176.15	201.308	186.629	204.463	166.35	174.351	156.04	131.04	108.777	95.5869	74.8394	64.691
2011-03-28 03:37:35		0	0	0	0	1.19373	4.43317	5.14038	9.56077	13.3505	19.103	26.9917	38.7176	48.3003	51.9186	51.6683	69.3929	54.8609	48.5635	48.0942	47.0199	42.1587	42.775	49.6458	45.8109	47.3744	61.0526	50.7208	62.6247	69.4404	81.4067	89.0647	115.371	129.81	149.113	168.245	190.16	208.341	200.627	196.236	175.048	177.961	179.948	154.367	137.221	129.726	108.227	83.5519	61.4846
2011-03-28 03:52:35		0	0	0	1.28872	0	2.21655	4.11228	12.0098	14.6306	23.142	27.4834	35.5173	42.6974	63.5199	60.2564	59.9952	51.0388	58.4234	43.6163	44.3087	47.2737	40.1247	42.2869	46.3064	53.4913	55.1705	65.716	65.0087	75.1429	82.5503	93.3737	103.442	139.694	158.019	165.03	185.793	217.386	229.048	205.579	194.758	202.007	189.629	149.016	129.223	122.409	100.545	89.3821	67.9548
2011-03-28 04:07:35		0	0	1.39185	1.28888	1.19387	3.32465	6.16869	11.5857	23.9275	18.9405	24.8596	43.1497	37.8346	57.8769	60.8811	51.792	49.0112	53.3231	51.533	43.3135	44.7003	38.0446	44.791	45.0167	47.2647	48.5462	63.9894	82.0599	84.541	99.0228	109.199	113.076	137.057	138.454	168.946	171.785	208.253	201.943	218.412	213.76	197.981	175.755	165.917	142.532	108.02	96.9109	75.4837	72.6862
2011-03-28 04:22:35		0	1.50601	0	0	2.38752	4.43314	6.16824	12.9892	15.497	20.3471	26.6546	38.651	34.55	45.0051	51.409	64.2731	56.199	44.7372	54.7683	43.7497	40.1702	38.5109	43.2013	44.7106	42.9478	53.692	60.5125	68.8042	75.5526	94.124	101.165	113.564	110.911	141.823	144.295	166.711	201.637	212.53	193.692	200.976	188.548	157.534	155.264	134.181	114.187	108.936	82.5119	69.4785
2011-03-28 04:37:35		0	0	0	0	1.19359	2.21633	7.19577	10.1261	6.59202	12.8299	23.9483	34.0054	32.8106	47.7333	55.6237	46.9679	63.4112	41.8571	39.7138	44.9881	46.0811	38.6321	39.7519	42.0798	51.1058	51.8833	63.1439	76.5436	73.4756	93.0638	82.4891	120.85	114.46	139.828	169.696	186.496	204.956	212.851	200.108	201.484	191.392	168.229	162.017	137.764	119.543	106.018	88.8663	66.0468
2011-03-28 04:52:35		0	0	0	0	0	1.10805	0	6.69074	11.5672	19.0855	21.21	28.6711	42.4077	52.3628	54.8644	46.266	40.3237	43.7702	40.6766	44.3779	35.8346	43.8071	37.8199	42.926	52.6606	57.0122	65.6135	79.8792	76.2577	72.0407	87.2628	116.685	120.14	150.753	183.724	193.42	210.074	218.75	217.088	211.026	182.769	161.691	153.323	136.008	123.193	101.724	73.9045	57.7526
2011-03-28 05:07:35		0	0	0	1.28852	0	2.21615	3.08321	8.60221	8.18058	20.5971	24.8668	35.6612	39.142	44.8641	45.6631	57.9353	48.0436	51.0817	37.4939	44.0381	41.9891	38.1846	39.1183	55.1516	54.7391	58.0244	64.8096	65.8949	67.0817	84.8583	96.1651	131.102	141.066	156.126	185.681	188.123	211.54	206.436	208.173	196.114	191.272	179.129	156.627	144.383	133.864	107.231	83.8859	58.4625
2011-03-28 05:22:35		1.62879	0	0	2.57692	0	1.10795	6.43032	8.35728	10.7275	11.2041	23.006	24.7186	28.0933	34.7003	49.7718	54.391	52.9715	56.9532	52.5833	48.9452	38.4519	44.5212	37.5994	35.7779	50.6119	55.1106	73.3763	81.4298	69.8987	106.25	103.133	120.651	130.356	168.988	204.784	202.51	247.514	229.521	270.677	230.218	196.665	204.856	180.166	157.109	125.731	103.997	92.9115	77.2712
2011-03-28 05:37:35		0	0	0	1.2882	1.19335	0	1.02774	4.77865	5.33849	6.64221	19.4085	25.868	30.761	26.2089	35.6974	51.8288	39.3744	42.1837	40.4718	41.2683	40.1285	38.0728	39.259	50.2067	46.8042	59.6644	81.8564	75.6949	84.1218	88.9532	111.573	129.974	151.022	175.807	199.778	219.718	211.887	242.067	233.74	231.757	218.572	198.924	173.271	153.66	152.097	118.053	88.9987	69.4301
2011-03-28 05:52:35		0	0	0	0	0	3.32369	5.13846	6.69032	8.09157	16.5272	12.6802	34.7769	36.0167	36.7865	51.6468	44.891	54.0429	39.9429	41.1917	40.8067	36.7058	43.0638	43.9462	36.7545	57.342	70.5718	68.3026	72.1987	78.4503	83.5029	96.333	108.244	130.351	163.63	173.736	204.481	220.587	213.722	232.975	231.537	207.941	196.01	170.068	155.383	113.205	109.021	88.2308	58.6843
2011-03-28 06:07:35		0	0	0	1.28812	1.19319	3.32327	4.11067	7.32308	12.7557	11.623	21.1501	28.7149	34.9596	39.9962	49.4186	43.9035	49.5644	43.8186	53.3397	41.5048	37.0042	32.4724	30.7562	38.476	50.5603	49.6734	60.751	61.8397	78.824	87.6865	93.7462	127.951	135.014	162.62	170.168	187.318	204.752	195.23	189.195	196.296	196.959	181.432	146.322	147.181	117.917	96.1564	81.1705	61.3548
2011-03-28 06:22:35		0	0	0	1.28826	1.19307	0	7.19308	9.55644	10.6756	15.0521	22.4747	33.8545	46.4263	30.8327	41.7205	55.4526	59.6971	44.7231	44.8987	43.042	42.2526	34.0853	39.8913	42.9513	39.0683	58.2474	72.5051	75.7705	70.8282	80.384	112.698	105.333	119.203	134.217	172.097	174.335	176.128	189.818	194.7	196.268	185.014	170.873	166.336	151.416	112.679	93.6468	63.9458	67.5353
2011-03-28 06:37:35		0	0	1.39101	0	0	5.07462	3.66288	7.50606	16.1404	25.2618	21.3183	42.7385	43.1038	60.2442	47.7179	64.583	54.9667	47.7673	48.4346	45.9186	40.7058	39.966	48.3994	41.6814	52.9247	61.0333	59.4292	68.6744	69.1064	85.5888	94.8208	120	113.681	129.319	149.858	155.343	182.342	181.851	187.088	207.294	175.875	157.798	156.885	133.632	112.977	92.6981	72.6792	60.3048
2011-03-28 06:52:35		0	0	0	0	1.19313	5.08907	3.49904	5.73301	16.0117	19.9218	33.4984	32.2865	52.3484	56.9519	53.0333	52.6535	54.9064	44.1407	55.3795	35.3019	43.4641	42.2936	39.6487	41.2641	54.2279	49.591	75.5301	64.6519	69.3929	76.9378	107.323	104.063	114.334	144.932	145.188	145.531	197.911	184.453	190.965	178.868	169.551	154.027	142.75	135.491	103.871	94.3465	81.05	59.0147
2011-03-28 07:07:35		0	1.50521	0	1.72023	1.96284	1.12893	5.13744	1.91112	16.011	18.261	32.7596	42.1138	47.1952	59.7705	45.934	47.1628	55.4981	48.1407	60.2061	34.1644	41.2792	38.6734	50.4298	56.9045	47.9837	61.5404	64.3401	66.3968	71.8997	85.1327	102.206	106.646	118.013	110.956	143.796	168.415	185.333	185.317	187.402	192.816	172.065	158.938	144.858	135.501	117.335	87.7183	83.4436	60.2337
2011-03-28 07:22:35		0	0	0	1.28806	2.386	5.53833	5.1375	2.86649	15.1221	19.6054	25.8984	26.5491	48.2689	53.8054	49.0615	67.7365	45.1814	47.0699	44.1122	46.8603	40.5542	37.7862	48.3138	54.251	50.5772	55.6933	61.7224	77.9112	66.7596	78.0901	91.9026	108.798	123.702	122.937	158.484	174.974	180.351	193.019	170.687	173.225	166.384	140.829	150.229	134.551	121.416	103.322	77.1051	60.5446
2011-03-28 07:37:35		0	0	0	0	1.19313	2.21514	3.25981	6.23571	13.769	28.5533	17.595	29.6086	30.2119	35.7724	58.5301	50.4843	59.3394	45.0298	49.959	39.9385	41.4131	39.4596	40.0228	47.4782	46.5612	56.076	63.0071	71.5125	72.0567	82.5782	97.7593	109.245	125.423	149.97	156.38	169.97	195.541	209.191	187.129	176.416	189.818	176.809	144.455	137.342	117.316	88.8353	79.3641	59.0455
2011-03-28 07:52:35		1.62829	0	0	0	0	3.32282	3.08241	4.77744	11.7143	14.8008	29.7025	32.8958	49.5878	50.8045	49.7724	47.9644	48.9218	55.5077	46.3048	40.4176	45.208	38.8045	45.8301	49.2753	51.4849	58.3821	66.9561	66.6096	79.2224	84.0974	103.264	107.852	131.845	142.602	142.885	174.467	195.713	184.712	197.25	191.332	181.408	173.363	152.192	143.027	117.54	90.474	77.0997	67.8846
2011-03-28 08:07:35		0	1.50495	0	0	0	1.10759	7.19224	3.53452	12.721	18.7456	28.4439	46.0442	39.8843	47.4654	58.3779	50.7487	54.7772	54.0567	45.0516	44.3657	44.7237	46.6391	30.9559	44.8824	46.7885	48.6901	53.4798	67.9138	79.5173	98.5436	96.042	112.328	116.505	115.142	139.736	158.229	168.528	176.931	192.388	177.328	179.146	163.72	151.186	131.755	125.897	98.0853	85.4365	65.1167
2011-03-28 08:22:35		0	0	0	0	0	3.32272	2.05489	5.73272	15.1209	17.4303	24.9417	35.9548	29.0451	50.0497	49.7599	54.1269	54.216	49.8737	47.3753	46.6446	39.6224	36.6163	50.7657	47.9298	48.2151	48.4109	65.3756	74.1622	70.2285	88.3558	90.5465	105.088	121.837	140.659	142.121	150.168	173.173	186.376	177.115	183.479	170.21	161.47	143.339	126.254	121.228	90.8353	78.1657	60.9244
2011-03-28 08:37:35		0	1.50521	0	0	1.19309	8.42923	3.48224	9.55449	18.6791	23.6028	24.766	43.5564	44.8026	40.6093	55.0266	45.0362	64.0433	55.2734	40.1853	46.6013	41.6647	47.0683	38.4115	41.8558	54.834	59.7551	58.9103	62.6968	74.1551	78.0176	83.941	102.19	117.761	132.238	138.237	147.146	158.76	180.591	169.435	190.955	167.871	159.319	167.766	121.558	105.671	98.6657	76.0125	57.8173
2011-03-28 08:52:35		0	0	0	0	2.38542	1.10757	7.19163	11.465	12.6511	13.0931	24.234	32.5622	37.1006	52.0676	57.3715	51.2503	52.7157	43.675	53.3619	43.1683	39.1029	39.1375	49.4702	47.1894	49.6955	60.4292	57.9628	66.1375	72.974	89.2833	102.371	120.194	103.65	157.913	147.55	149.191	173.107	185.11	190.781	171.054	180.108	175.367	145.543	131.18	114.816	99.1067	90.2176	51.7006
2011-03-28 09:07:35		0	0	0	0	2.38562	2.21474	5.13628	8.59837	10.6731	17.4293	20.365	42.4913	50.3715	42.0542	52.8535	50.5558	52.3981	46.3144	51.0599	41.1119	31.6695	40.4545	42.0356	44.4596	55.9321	58.8019	64.7587	70.0455	78.1173	77.567	82.5933	88.8413	113.336	129.581	168.409	182.101	203.978	215.271	213.101	192.829	173.742	173.341	146.577	127.075	122.682	100.439	85.9676	64.3519
2011-03-28 15:37:35		0	0	0	0	0	2.21903	10.9815	10.8448	7.80869	16.1022	26.7239	32.2766	44.7558	43.183	46.8006	63.0769	56.6824	45.8218	54.7978	42.1109	37.9907	43.4522	39.7122	45.1766	42.1183	61.6442	67.9109	68.766	69.6949	87.059	92.9231	99.2433	146.945	138.217	175.433	184.245	179.465	199.037	188.105	195.949	187.658	171.5	151.294	150.509	107.631	93.9311	81.2994	54.4365
2011-03-28 15:52:35		0	0	0	0	0	5.54795	7.20513	6.70042	18.4525	16.97	28.9441	30.3614	41.3747	35.9016	44.3503	42.9179	46.3708	44.6272	38.2481	42.8897	41.4962	35.8407	47.2962	50.3792	46.1679	48.3708	71.1599	69.6824	74.4288	86.292	101.667	110.903	136.198	155.841	172.522	192.678	202.047	201.06	220.237	206.588	172.873	173.626	148.902	136.721	115.363	96.5019	77.3266	64.0628
2011-03-28 16:07:35		1.63117	0	0	0	2.0645	5.8499	7.88022	9.90038	9.80215	19.233	21.1234	29.1847	37.2708	39.4346	56.0516	46.7054	42.2577	50.9429	38.1689	35.1375	34.3378	43.2689	38.9115	44.9875	59.525	52.1904	60.0965	79.0026	76.4567	77.6163	99.2516	124.133	146.308	147.368	163.884	182.62	206.406	197.979	201.114	206.989	179.011	162.885	143.73	148.283	124.588	92.8808	79.3747	66.5721
2011-03-28 16:22:35		0	0	0	0	3.58545	3.32875	1.02927	5.74333	9.54788	15.2051	18.6469	22.4021	41.1587	39.8984	49.2949	57.8487	50.5458	39.6904	44.4298	37.0115	42.0785	38.1038	45.2574	43.6503	44.2401	47.2978	66.658	65.1545	74.8721	94.4458	109.149	122.931	128.173	142.618	178.486	191.048	199.657	189.419	198.876	206.336	193.93	174.914	152.729	145.577	121.129	91.0686	81.7288	56.341
2011-03-28 16:37:35		0	0	0	0	3.5858	5.54801	7.20548	9.57221	22.0192	24.3574	26.5889	30.597	42.7304	38.1875	40.5779	53.3599	45.1256	49.9869	37.8641	45.3388	40.0917	40.1526	43.2401	52.0106	46.5022	53.8298	68.8042	70.5692	76.9327	73.2679	94.6843	120.899	124.443	150.531	182.398	180.337	186.396	211.961	214.147	209.611	189.71	170.537	161.739	137.965	112.304	95.6837	73.4593	57.0372
2011-03-28 16:52:35		1.63131	0	0	1.29018	3.58554	4.43817	4.1174	10.5287	5.34635	19.9571	21.8984	23.0156	36.3625	41.0244	52.7276	46.8865	43.1462	50.5468	51.9144	46.3817	43.1744	35.9087	45.517	47.5933	47.4465	53.9141	72.6558	83.9587	73.5538	87.3266	106.823	123.457	137.795	159.395	171.969	182.71	194.958	205.807	210.338	202.989	189.072	163.906	153.237	130.643	101.908	103.065	81.9458	59.9542
2011-03-28 17:07:35		0	0	1.39337	1.29014	2.39022	0	3.9159	10.7158	11.5844	14.9672	16.1585	24.2065	40.942	47.0673	40.0782	42.8096	47.9067	39.049	48.4131	39.9564	36.0298	35.7606	42.2724	41.9715	50.0324	55.4862	65.7279	61.4692	71.4833	97.5965	105.583	129.345	133.113	148.075	185.04	190.661	185.014	218.718	211.877	213.546	187.804	157.556	143.942	134.269	110.529	99.5163	75.0792	63.6263
2011-03-28 17:22:35		0	0	0	0	3.58567	2.52013	7.76343	5.24375	13.9982	20.1183	22.6404	26.7007	29.1967	28.6036	41.3038	45.617	47.1093	53.7212	40.058	40.7631	36.3728	40.7481	42.1792	45.7128	52.5426	56.4276	67.917	64.2984	79.233	83.0667	106.371	123.241	134.609	150.329	178.52	187.62	185.683	199.147	215.028	182.622	198.378	174.393	154.678	140.261	107.21	106.942	84.0061	71.5058
2011-03-28 17:37:35		0	0	0	1.29032	1.19523	6.65724	5.14609	5.74279	6.23763	23.3686	20.2174	18.5176	36.2667	56.0821	36.2542	50.4715	50.9074	53.1353	39.8058	31.6356	38.7272	29.5687	44.2737	44.6564	45.9657	64.1311	59.8657	65.9276	78.9997	92.4183	104.265	126.647	152.256	167.101	158.362	179.135	191.575	201.657	204.958	193.455	189.523	165.567	152.911	154.285	117.095	86.3321	78.8571	56.3715
2011-03-28 17:52:35		0	0	0	1.29024	1.19507	2.21907	5.14612	3.82849	15.1481	15.9696	23.7104	32.2417	27.8678	40.299	51.2378	50.2872	44.4747	44.0179	35.6776	35.1173	45.7907	41.2609	39.6103	42.6734	37.5122	54.4958	67.2574	70.0295	77.842	104.213	88.491	116.59	143.175	139.295	168.478	187.101	201.669	192.51	201.933	204.417	187.171	174.756	139.138	146.793	114.433	94.9138	74.2442	59.433
2011-03-28 18:07:35		0	0	0	1.29022	1.19525	4.43837	2.05849	13.9473	12.8584	14.1367	18.847	27.4882	31.0807	42.2231	40.7561	51.0122	42.174	43.7122	44.3362	39.7417	42.151	45.2551	26.7388	44.8314	49.2667	59.5606	71.3356	70.2663	73.9131	97.3663	86.4051	114.517	118.581	155.928	166.911	184.285	205.373	197.33	201.508	193.223	180.501	154.363	149.543	148.015	114.521	96.4426	78.8946	55.3952
2011-03-28 18:22:35		1.63119	0	0	0	1.19499	6.65676	11.1394	4.95558	16.694	16.9633	26.124	29.2624	35.5458	37.2449	43.1583	48.1625	49.1446	40.5862	53.4939	38.3353	42.3628	36.4051	37.4179	41.684	45.8035	59.441	66.4519	67.5692	71.8606	80.9173	100.214	131.665	141.388	152.44	154.744	192.085	184.387	180.285	170.443	201.899	166.134	151.919	153.684	136.881	112.716	94.3256	74.1814	63.8083
2011-03-28 18:37:35		0	0	0	0	2.39021	3.3283	6.17535	9.86792	10.417	12.5826	19.9858	39.2644	33.8131	43.1978	43.9144	41.3968	45.3974	41.4394	45.1397	34.1551	36.6885	33.776	39.2131	40.1196	43.2231	56.5965	63.9429	67.5016	79.0119	98.3571	101.696	112.146	134.491	130.593	149.575	170.443	197.512	192.911	179.563	192.276	193.139	166.446	142.63	133.129	125.587	99.7042	69.2494	51.2433
2011-03-28 18:52:35		0	0	1.39317	2.58033	2.39021	3.32833	5.14593	4.78577	12.2507	16.0066	21.6002	28.1134	33.3263	52.2926	43.6205	45.0968	42.7381	38.476	41.651	46.3561	43.292	33.9962	32.5208	41.6599	45.1929	53.0035	66.434	83.7776	79.2061	84.9785	102.327	106.328	129.153	140.801	175.954	175.337	203.259	176.244	194.331	200.823	166.224	167.204	131.292	135.769	112.245	92.7894	70.7465	57.8554
2011-03-28 19:07:35		0	0	0	1.29008	5.97535	3.32846	5.99478	9.73888	7.12811	18.2917	17.6951	24.727	28.0208	44.6061	42.1702	46.7615	47.9333	48.4958	44.3256	48.9333	34.9804	36.0641	51.4724	39.7423	56.5667	59.9532	71.2494	63.3497	72.1022	92.1423	94.1933	124.768	134.387	150.649	168.053	209.337	208.542	211.815	212.851	199.978	199.832	175.507	154.686	144.267	111.601	90.9756	84.7298	59.6667
2011-03-28 19:22:35		0	0	0	1.29012	2.38998	2.21875	6.17462	9.57035	4.45468	21.0341	20.6002	37.2202	36.2952	51.0196	43.8112	46.1417	51.9506	39.9971	42.0093	43.7071	42.5548	33.1564	40.409	42.9372	52.0353	53.6484	67.2442	63.6679	66.9747	79.3032	91.1215	110.361	115.623	137.971	171.669	175.196	198.413	198.56	180.258	192.692	171.787	164.928	140.791	128.938	107.27	97.1026	70.6859	62.816
2011-03-28 19:37:35		0	1.50761	1.39317	0	3.58484	4.43747	5.14538	9.57013	21.3819	18.2907	22.3948	34.3994	39.0708	36.208	45.1497	46.3465	44.6413	37.5635	42.7051	42.5538	39.0253	39.6994	37.7737	42.4641	54.4833	44.3423	61.3237	68.3449	72.8256	88.4917	103.473	114.493	136.262	156.643	166.921	168.932	196.471	189.718	181.013	188.612	168.832	159.604	155.096	138.618	109.477	102.068	69.5962	55.9958
2011-03-28 19:52:35		0	0	0	0	3.58481	3.32814	7.20381	8.61343	13.1538	14.454	27.1614	42.0731	36.7471	46.9433	45.1106	56.8622	45.0141	50.5837	49.8577	35.442	35.759	47.4715	35.3279	43.7022	40.4324	44.5391	48.7978	66.0436	61.9	82.6606	96.1093	101.92	132.061	133.311	159.982	159.786	201.661	175.363	184.754	179.732	174.754	167.32	150.152	135.288	99.6696	81.5378	79.7359	55.2737
2011-03-28 20:07:35		0	0	2.78622	0	2.39002	6.65603	12.3492	7.95965	16.4246	19.578	27.2097	34.2904	36.6936	40.234	49.0862	45.9532	40.9308	44.7353	40.9596	40.4147	38.284	26.1827	37.3093	40.5163	47.6846	56.8859	59.417	58.4849	68.3987	66.1782	90.1554	96.2333	138.279	130.042	158.758	156.25	183.724	183.365	176.492	176.687	179.575	160.679	141.21	125.308	93.1997	91.1487	73.1359	48.2795
2011-03-28 20:22:35		0	1.50735	0	3.86958	2.1127	2.4757	7.20308	9.90244	18.2073	16.8036	26.3251	32.5603	33.7119	43.0657	49.2545	42.4119	51.4176	46.7256	45.1516	35.166	38.5718	41.8157	31.6635	41.5324	43.0619	52.7795	60.1952	71.2936	75.7554	75.1894	85.6897	109.317	114.431	132.546	154.487	147.851	170.429	189.601	185.966	175.827	175.23	151.094	155.066	122.832	111.778	90.7054	76.7788	56.6282
2011-03-28 20:37:35		0	0	0	2.57977	2.38968	2.21875	4.11615	9.57006	14.2546	16.7537	22.6769	34.9625	34.5747	36.1452	47.4881	45.059	46.2478	45.7388	49.3712	35.2721	29.9365	42.8897	32.9292	38.3381	39.2766	43.4817	53.1833	62.8455	76.7452	83.8853	93.4984	106.968	112.313	129.796	142.919	171.452	162.041	156.727	189.445	172.666	174.239	143.946	149.435	134.738	100.809	76.5612	79.9349	56.8583
2011-03-28 20:52:35		0	0	1.39311	0	1.19477	1.10938	4.11599	8.61221	13.18	21.1054	27.6513	31.2025	35.717	49.008	47.6163	50.2375	43.4929	51.6413	46.576	39.9654	39.7266	40.708	35.8154	46.95	48.3426	45.074	61.1093	63.0317	58.2433	72.466	90.6737	95.9324	118.843	154.697	161.254	176.897	171.188	177.973	178.057	174.884	157.608	148.83	135.723	113.934	111.049	87.4487	66.0045	64.9824
2011-03-28 21:07:35		0	0	1.39297	0	1.19491	2.21861	9.26167	16.2686	16.9271	17.4579	25.5395	28.8085	38.1372	54.7436	33.2468	42.6647	42.5971	42.1381	44.5054	46.6734	36.1353	33.809	48.3391	40.3304	46.8295	49.7179	50.0955	63.4872	75.9205	77.3596	90.3551	98.241	108.22	129.157	157.224	161.24	178.093	182.223	176.887	182.192	177.73	162.25	144.219	134.615	107.96	95.4365	79.8394	58.4776
2011-03-28 21:22:35		0	0	0	0	0	6.65538	6.03545	3.95654	12.4718	8.31314	21.5084	31.0817	44.7247	54.1881	58.2946	56.1715	41.9548	51.4699	40.9141	39.7885	38.4846	41.0317	36.2413	41.0779	53.9766	57.474	56.4147	65.2538	75.3522	81.1686	79.05	107.928	116.482	139.247	153.009	163.069	175.703	168.802	172.787	180.865	169.099	156.054	149.72	125.846	102.596	81.4715	69.6567	58.0596
2011-03-28 21:37:35		0	0	0	0	1.19463	2.59702	10.8427	6.81433	12.4715	15.7944	17.9978	31.9029	43.0385	49.0038	49.0929	56.7817	44.7513	43.8144	45.6375	39.0952	38.7708	40.2032	46.7558	41.4513	56.6734	60.5202	51.1237	66.5968	77.3965	63.141	81.8865	123.098	103.354	120.921	164.734	165.976	178.612	173.702	186.266	184.547	172.264	162.644	148.958	129.053	111.595	99.5587	67.6343	56.4186
2011-03-28 21:52:35		0	0	0	1.2899	0	5.89497	9.83994	11.9421	17.1471	16.1244	30.4792	31.1496	29.9165	44.1987	45.3853	51.4901	46.7987	47.7375	36.6958	39.2904	32.2583	39.1093	39.1984	44.0926	41.4256	50.7029	53.3067	60.8622	68.1699	75.1093	80.1917	96.4708	118.834	129.127	144.954	159.665	164.936	176.987	185.413	161.222	161.941	161.106	128.338	119.037	99.6337	89.3766	77.9513	60.0558
2011-03-28 22:07:35		0	0	1.39291	0	0.923817	6.90679	5.1449	7.03865	13.0449	25.9295	23.8471	36.5035	40.691	40.9115	48.2715	42.5452	52.0788	58.7519	43.0824	44.4026	45.6724	36.1478	36.2753	41.8365	36.7542	38.6074	54.9192	54.5869	66.9167	76.0606	84.3442	105.855	131.619	121.791	145.024	147.59	167.542	158.902	184.375	170.471	153.045	154.591	137.532	122.258	97.4263	84.4792	74.0115	53.0349
2011-03-28 22:22:35		0	0	0	1.28982	0	1.10921	4.00064	13.8296	11.2778	23.2758	24.7734	29.0707	25.2652	35.5647	46.4378	45.3833	51.0622	50.6151	46.592	45.8962	42.7545	44.1054	43.3804	47.1131	39.1365	48.451	62.9917	53.7022	64.5189	67.6087	74.8981	88.4833	109.577	126.635	139.607	157.372	170.982	164.806	165.819	166.25	169.846	144.962	130.106	112.572	109.71	83.5846	63.1215	52.9051
2011-03-28 22:37:35		0	0	0	0	1.19463	4.43683	6.17423	18.1802	16.7706	23.5672	29.1598	38.8356	43.4955	45.7769	42.5321	53.2167	53.0609	47.8853	48.9628	45.5856	42.0061	42.7904	38.2615	36.2942	39.7292	46.3183	54.8029	52.3763	70.6465	65.0814	82.1317	101.591	103.548	116.405	140.327	148.486	147.544	141.463	170.835	169.121	153.844	151.462	122.911	120.942	93.4077	70.3019	68.808	54.4388
2011-03-28 22:52:35		0	0	1.39293	1.28974	2.38963	3.32772	2.05809	13.3968	12.2861	20.2742	28.8105	30.119	28.868	47.1936	53.4394	49.7128	56.0484	42.3369	35.9529	34.6526	36.0308	41.6926	27.8049	41.7401	44.3651	37.4936	53.1067	63.967	62.7606	78.5894	98.9577	90.8577	98.8224	129.471	138.434	131	171.142	172.584	177.208	161.587	156.326	166.192	147.498	137.429	104.445	85.5	64.2776	53.5359
2011-03-28 23:07:35		0	0	0	1.28994	0	2.21865	6.93984	7.90019	11.5811	18.2888	20.0653	29.0385	36.9244	36.6942	46.2923	45.9365	52.4603	50.0821	52.3686	36.1728	37.2792	34.8333	34.3599	44.676	45.617	50.3891	57.5865	52.3619	61.6458	76.4006	90.983	113.537	107.694	135.894	143.684	146.356	159.345	160.156	170.968	160.978	147.7	142.548	145.208	120.049	110.633	87.6487	75.9622	51.6276
2011-03-28 23:22:35		0	0	0	0	2.38958	3.70196	6.85574	10.8665	11.2642	18.289	28.6395	40.1237	41.651	45.5997	41.9811	45.1038	50.6667	46.5215	45.8093	35.225	38.1644	35.951	36.7596	41.3965	51.549	38.0494	51.8942	52.9404	67.7202	70.1263	80.2279	113.503	98.7314	123.446	129.745	157.055	166.691	164.597	175.148	156.422	161.034	146.274	139.599	112.887	104.338	87.3167	67.3853	60.4417
2011-03-28 23:37:35		0	1.50753	1.39309	0	4.77946	2.21869	5.14519	10.5267	21.1728	19.4443	24.8269	30.767	47.1821	42.0862	55.249	60.5234	56.9721	54.2446	46.8846	47.3375	35.4131	42.3593	35.4519	33.3821	39.1673	46.1971	46.5269	57.5923	72.2099	70.7615	69.2644	96.1304	99.3298	115.379	134.413	126.829	152.105	158.9	161.428	156.48	150.356	143.199	120.681	113.92	107.494	89.4144	58.6968	49.7449
2011-03-28 23:52:35		1.63087	0	0	0	1.19479	2.21859	11.3194	7.65561	10.6901	18.2893	30.774	31.5751	46.0715	42.0138	48.592	61.3087	48.6542	53.4446	45.7814	36.5067	39.0119	36.7	34.9455	27.6673	46.3349	46.7401	52.2894	56.4538	63.2981	66.6465	80.149	75.9638	109.287	135.403	130.19	129.838	146.43	162.965	148.83	166.046	171.903	142.756	126.394	121.146	98.6946	78.4375	63.9356	51.5619
2011-03-29 00:07:35		0	2.79499	1.59639	0	1.19487	8.87455	7.20372	10.8504	16.6267	17.5925	21.0463	33.1016	46.4096	49.4308	49.933	51.0397	61.0179	45.5631	47.4112	43.8522	38.324	36.0151	36.5564	39.5244	37.1256	43.1349	51.176	46.5728	52.9897	66.7641	78.3894	86.0061	86.6782	122.197	142.057	143.884	127.298	149.08	155.108	155.373	155.517	129.219	130.395	115.78	100.049	79.8587	63.9788	58.0478
2011-03-29 00:22:35		0	1.50729	0	1.28984	0	5.54593	9.12901	14.4758	19.5979	22.9255	20.9926	42.3881	38.6901	47.6333	61.3962	63.334	55.3221	50.1375	49.3625	43.8449	47.3288	31.0228	33.0288	40.8955	36.0391	37.249	55.2622	56.542	52.8042	61.925	71.408	79.4458	102.465	99.9026	128.886	118.074	140.535	160.715	153.622	155.266	142.935	145.591	124.72	121.264	101.476	74.6054	70.5026	53.6343
2011-03-29 00:37:35		0	0	0	2.57977	2.38976	3.32772	11.3197	11.4842	12.4726	22.4463	21.4962	39.299	48.4032	56.3772	44.7779	53.5869	61.9545	50.5276	52.1654	41.2769	44.9221	35.4846	40.3824	28.9026	34.8131	52.0378	51.5035	50.9362	62.3426	64.8609	70.6212	78.2439	80.5875	108.817	126.753	125.869	136.921	143.544	167.242	145.146	135.146	137.392	109.546	113.742	106.663	82.3689	77.0971	54.2455
2011-03-29 00:52:35		0	0	0	2.57993	2.38962	8.8741	6.02856	9.07593	20.1849	30.0669	30.6104	34.7439	46.3676	58.6724	62.7756	63.2593	61.3199	56.4449	52.1349	44.8333	54.0439	38.0099	37.1856	30.6721	23.8347	39.8606	43.3622	49.0503	53.0494	69.0846	78.3112	86.3808	93.3016	103.908	113.042	128.71	131	143.363	145.221	156.903	142.981	124.217	127.22	118.592	94.2904	82.0747	72.0888	54.2032
2011-03-29 01:07:35		0	0	0	0	0	3.70019	10.9738	15.311	15.1448	21.0699	23.1795	33.284	44.2785	60.4019	60.8933	55.7939	49.5939	51.2054	55.7715	53.3016	35.1878	36.4731	41.6093	30.1346	42.4981	51.8955	43.9058	44.3875	60.7683	57.5135	64.2013	78.0663	77.7096	99.5074	116.878	141.875	140.322	150	165.356	150.697	146.819	141.627	126.705	108.222	92.1413	82.2526	73.3962	53.4519
2011-03-29 01:22:35		1.63069	0	1.39289	2.57965	4.77926	3.72321	8.89337	6.06952	15.7298	27.0499	34.6833	36.5554	45.158	48.1676	55.3439	55.0548	53.4859	55.2862	52.8038	33.0811	38.9708	37.5106	32.817	35.3285	36.8692	39.3651	47.7788	54.6042	62.4593	61.6244	73.6163	89.7856	86.6365	103.629	114.541	133.646	143.512	143.982	152.458	147.722	139.331	136.14	113.424	115.917	108.107	87.6349	65.4603	54.9458
2011-03-29 01:37:35		0	0	0	0	2.38948	5.54619	5.14474	14.3538	14.8347	32.7103	19.1197	36.7503	32.6647	51.4119	57.999	59.5708	61.7151	67.2103	56.7881	49.3199	38.2369	44.1545	32.0437	31.1286	43.0853	46.2141	48.3766	47.966	56.317	50.2567	58.3532	83.5061	84.1737	102.025	102.714	133.746	145.07	156.989	152.418	151.851	152.518	138.714	142.304	113.935	94.8811	84.3888	73.3994	62.6824
2011-03-29 01:52:35		0	0	0	0	1.19473	7.76465	8.23221	15.3105	14.0656	23.7511	43.5446	32.724	44.1663	55.6583	69.1705	74.6314	61.2176	56.9869	64.0436	38.1353	46.6856	34.4192	39.7144	34.6974	42.8779	40.2686	44.4442	41.2279	50.5103	51.2689	61.309	73.0282	78.8894	91.0346	97.7308	112.239	135.789	129.804	144.103	145.212	150.106	141.757	125.897	115.03	98.6747	90.7	79.8256	52.691
2011-03-29 02:07:35		0	0	0	0	1.19471	7.76481	6.17407	10.5262	18.3339	24.6268	25.1617	38.1458	47.8554	55.6064	49.599	62.8923	66.8609	58.4372	51.9138	41.566	45.6103	36.7811	32.7872	32.308	34.2353	40.2372	45.7641	42.3679	60.0462	53.5462	61.6481	63.4154	71.1298	90.0221	101.435	122.346	137.035	148.476	149.303	152.149	147.255	134.848	133.538	135	97.175	87.6054	70.9683	58.9946
2011-03-29 02:22:35		0	0	0	0	1.19471	5.54644	4.11638	12.4405	16.7563	30.0862	26.4127	31.1907	50.7375	64.7827	64.7324	67.3696	60.3596	56.8311	46.8571	56.9821	44.3006	38.8567	35.6279	34.5744	24.0917	26.4621	47.3696	41.6875	46.6526	52.8929	60.3728	80.9827	80.2603	84.9333	97.1532	108.384	129.898	134.072	132.911	145.501	130.322	136.969	130.423	132.376	118.079	83.9763	73.7109	55.2926
2011-03-29 02:37:35		0	0	0	1.28984	3.58442	3.32798	8.23199	9.90792	11.9647	18.616	22.4153	34.9404	45.5455	53.9577	62.3058	66.2237	72.2522	66.0401	53.8103	48.0997	38.3811	30.5509	32.8064	29.0563	36.0087	32.1747	44.9003	42.7849	47.5984	42.5388	62.6875	66.4135	94.2369	85.5692	88.8933	113.939	132.542	129.647	148.772	160.475	151.715	132.434	141.819	122.941	102.173	79.125	78.8375	51.0987
2011-03-29 02:52:35		0	0	0	1.28984	0	5.54647	2.05815	10.5272	8.01798	24.3971	26.6042	47.6554	44.3577	60.2856	66.6513	65.6516	69.1099	57.1644	49.8897	51.0099	54.1103	39.75	38.4221	34.3737	27.9401	37.1676	45.9369	43.5997	46.4574	44.3144	62.867	81.4003	86.2006	93.4167	110.28	115.25	121.747	126.416	142.422	138.518	139.101	133.714	130.353	129.483	108.86	88.2022	70.3096	64.459
2011-03-29 03:07:35		1.63083	0	0	0	0	4.43705	8.23215	12.7658	13.0597	19.4303	31.0611	45.2135	42.1093	66.633	56.6955	77.1106	60.0064	53.3003	64.5628	54.3279	47.9987	39.7651	34.0942	30.5212	40.5516	37.0234	43.2631	39.2609	51.2103	59.8426	61.1827	54.3744	89.3224	97.3705	102.912	117.032	125.757	141.917	155.296	135.018	145.591	140.08	130.561	117.306	107.779	98.9279	70.299	52.9558
2011-03-29 03:22:35		0	0	0	0.200421	2.20433	2.60577	9.93128	8.61285	19.5994	25.7706	30.3472	35.6471	46.8189	49.7596	59.3016	63.8263	74.6135	65.3843	48.5026	50.1099	47.433	42.5061	40.3465	31.2686	27.8928	28.2005	32.0489	47.9292	51.9468	67.9413	72.5715	78.3202	84.8481	92.5128	100.718	101.361	111.467	125.858	134.509	148.346	144.463	155.018	156.172	124.377	106.939	90.2292	76.9026	64.3327
2011-03-29 03:37:35		0	0	0	0	1.19477	2.21843	6.17433	6.08003	12.8272	18.8135	28.0769	37.8324	52.1776	55.8272	63.8327	69.109	69.4635	58.3881	75.5917	57.4849	45.0343	33.7554	28.6665	28.629	34.9103	35.7192	36.3038	52.4446	45.2381	49.5064	56.2253	69.2856	77.842	91.0205	90.1135	117.433	114.051	118.76	132.229	134.529	149.146	130.775	140.601	133.075	118.855	85.8468	80.8808	53.6372
2011-03-29 03:52:35		0	1.50735	1.39303	1.28984	0	4.43708	9.26119	4.78442	11.2099	19.4658	18.1561	38.6599	40.1045	47.4093	60.274	76.8689	72.699	76.2663	58.2369	50.6628	44.0109	39.4587	29.5603	33.0266	35.3558	34.5917	39.299	34.7808	36.6269	46.7321	58.3071	70.7859	71.0808	89.2333	105.977	116.89	128.678	131.619	148.628	142.618	143.047	139.064	131.008	134.736	108.285	92.9772	78.2391	48.6269
2011-03-29 04:07:35		0	0	0	3.86997	0	6.65654	6.17487	6.69907	17.5923	24.3205	27.1156	42.7196	46.2449	59.316	62.6176	75.008	72.6788	71.7673	69.1288	60.7311	41.2878	38.5413	38.625	33.6894	26.1174	41.8792	38.6208	40.9949	48.6058	50.9074	46.3843	72.0205	69.575	98.8231	91.9795	105.655	131.987	130.733	138.606	130.038	145.377	149.581	134.91	110.285	99.7388	100.216	71.9263	59.2
2011-03-29 04:22:35		0	0	1.39307	1.29008	0	2.21889	7.20397	16.27	11.5822	14.1339	18.4911	36.0654	56.642	61.3506	63.8122	75.2365	70.9058	72.2897	64.5574	50.5481	47.6897	39.7603	36.1295	37.816	28.5327	31.011	31.013	42.3324	41.5071	52.1167	50.5247	67.776	87.3212	74.2446	92.2314	108.424	111.96	130.904	140.994	147.402	145.865	148.788	133.247	134.854	111.626	107.632	83.4468	56.8731
2011-03-29 04:37:35		0	0	0	0	1.19485	7.76535	1.89647	3.02138	22.0802	17.0886	32.7497	25.1729	47.4603	52.0099	64.2679	67.3272	69.4859	72.941	57.0782	58.4446	49.9253	39.7481	39.4516	31.6294	31.627	36.1151	44.7968	38.8923	39.9276	43.3923	52.4596	54.0301	69.8263	85.7125	105.346	120.851	121.577	151.244	129.994	154.341	150.064	154.712	135.463	124.172	107.562	109.312	82.6218	59.1635
2011-03-29 04:52:35		0	0	0	0	0	2.21855	6.1742	4.78487	14.2535	18.4046	36.0622	46.3574	49.0792	54.7327	63.8981	64.8119	73.9926	82.3978	74.1468	54.3532	60.8843	31.1378	32.4833	30.269	35.2087	27.1332	35.7288	35.4276	37.1516	44.8891	57.0308	63.9388	68.6228	82.401	87.6131	96.3865	105.41	136.831	139.337	155.885	144.205	145.098	136.781	119.741	119.71	94.1157	86.5208	73.4545
2011-03-29 05:07:35		1.63061	0	0	1.29006	0	0	4.11609	4.78449	19.3782	16.0021	24.0801	34.7513	46.8279	54.2657	61.3128	68.5817	85.3676	68.599	64.5885	68.6439	55.4343	33.9795	33.9516	33.7468	21.2637	34.8478	39.3157	35.0051	40.2253	47.5324	44.6115	51.6407	60.7872	74.5356	83.9228	106.878	133.638	130.938	146.985	142.282	160.12	141.865	125.282	122.245	106.561	99.7609	75.176	60.2038
2011-03-29 05:22:35		0	0	0	0	0	3.32833	3.08744	7.96756	18.421	17.7812	38.5109	34.0705	44.7522	65.3987	68.8657	71.2096	79.8202	89.8897	64.5372	61.7186	43.699	39.1673	34.1744	28.4958	28.1585	29.4341	36.9192	35.6327	37.8397	47.9926	58.0558	67.7798	64.3788	75.6702	111.414	104.763	113.541	132.348	143.099	149.397	138.378	144.81	143.494	123.009	99.3455	94.7881	71.6096	68.5596
2011-03-29 05:37:35		1.63115	0	1.39317	1.29021	2.39008	3.32817	2.05831	7.65676	16.9296	25.774	33.1731	33.7343	39.5093	72.1612	69.9321	89.0468	78.0173	71.9833	65.9981	57.383	49.7984	40.5054	42.5747	31.483	27.1596	40.9728	40.2962	31.3175	43.9304	47.3042	51.1913	60.8853	68.3952	75.4763	70.0154	92.4074	127.702	132.258	132.103	155.607	157.129	137.51	127.827	135.733	125.126	94.5439	83.6548	55.1455
2011-03-29 05:52:35		0	0	0	0	1.19507	2.21885	8.23337	10.5282	9.80106	14.1346	24.7229	39.3202	43.3314	49.9817	70.6083	76.9301	69.7327	72.0189	63.6218	57.9958	49.3157	44.1029	31.6274	27.5012	36.8096	23.1324	33.4683	39.9353	33.9785	39.276	55.3115	67.6282	91.074	78.4375	97.1641	116.533	127.346	118.434	131.875	156.37	141.188	154.567	120.583	123.616	115.743	102.623	82.2385	72.5115
2011-03-29 06:07:35		0	0	0	1.48704	2.20753	3.3283	7.03317	3.03027	12.4737	20.0697	15.6569	40.3849	57.5349	61.4429	62.5109	80.4083	85.1292	64.3596	61.7163	62.8285	55.567	37.0731	28.9828	33.1798	30.5375	27.7368	32.4199	39.0378	40.1013	31.628	49.6804	56.8196	68.0141	77.1061	98.2144	114.626	108.932	133.504	145.527	132.029	140.062	146.625	137.065	131.198	107.432	97.8821	78.742	56.2385
2011-03-29 06:22:35		0	0	0	0	1.19491	0	4.11676	5.07446	16.6601	22.4489	32.2144	33.2913	48.3042	64.6006	57.1321	64.5804	74.2702	84.3054	64.3817	63.2865	49.8439	49.1612	32.9519	31.5214	23.6673	37.2071	36.6359	26.0939	35.8641	45.5574	47.1176	65.6032	65.8808	78.7535	87.8712	112.236	120.536	127.943	145.327	133.009	148.055	134.868	143.183	121.04	120.168	104.695	89.4154	66.9301
2011-03-29 06:37:35		0	0	1.39325	0	1.19493	6.65692	4.97266	7.81792	13.365	24.2204	25.3668	30.2131	44.7997	58.3603	51.9561	76.8535	84.1529	78.8708	62.2859	67.9346	49.8022	38.8282	38.8369	33.6529	26.6901	25.7618	31.4383	33.5904	35.6622	40.7125	47.4859	60.9199	79.8503	81.967	97.6827	104.381	121.286	116.821	134.263	152.748	148.666	151.142	149.718	122.879	124.686	106.312	90.0016	65.2276
2011-03-29 06:52:35		0	0	0	1.29021	0	3.3284	2.05853	7.65676	14.256	17.6342	28.8896	37.1016	48.6747	52.2244	62.7042	72.6372	74.2599	64.2971	66.8234	56.0115	47.1814	38.9324	33.5837	27.8494	24.6645	35.583	31.6246	29.6132	35.7814	48.9763	38.992	52.7946	74.6308	81.5705	97.1923	107.579	112.095	119.433	136.384	141.797	148.802	157.252	140.615	134.437	111.438	92.2974	75.5333	61.9571
2011-03-29 07:07:35		1.63093	0	0	0	1.19501	3.32827	2.05829	5.74253	12.0316	17.0411	29.1687	32.7276	43.1074	58.3766	74.8994	62.6897	61.4526	73.9442	58.1561	55.1949	43.2042	40.8038	32.1699	31.8153	35.2157	27.8746	36.001	34.424	39.2721	38.7452	49.4696	64.4548	65.142	90.9587	87.6481	115.923	113.438	110.053	155.435	147.526	145.775	137.846	139.371	137.888	109.095	92.6439	76.7369	55.6199
2011-03-29 07:22:35		0	1.50765	1.39313	0	2.39016	2.90505	8.62622	4.78542	4.45506	12.5879	28.641	39.1542	42.192	45.1231	58.8401	68.116	79.0388	62.5513	70.9099	66.3096	45.0205	39.2071	43.1994	31.7081	28.0835	34.7606	30.5635	30.2306	36.8526	37.0372	42.3516	58.2054	60.4965	73.2237	94.2747	102.083	118.929	124.812	137.141	146.703	140.128	144.315	123.438	127.993	121.899	91.6375	75.8452	54.9776
2011-03-29 07:37:35		1.63113	0	0	0	0	1.10952	8.23385	15.314	14.9036	20.4678	28.8554	27.5156	55.4308	54.2724	66.4436	66.5196	70.3288	70.1881	66.4692	56.916	53.5769	43.1869	36.1167	35.075	34.375	29.9333	28.2835	32.2343	39.5888	44.5327	54.7929	47.0772	69.3433	72.0006	99.0933	97.2497	108.086	140.208	125	132.019	140.178	123.992	131.314	115.06	115.101	102.331	77.3859	64.4436
2011-03-29 07:52:35		0	0	0	0	2.39021	1.10954	8.04446	15.778	16.664	14.1358	31.7308	43.5949	47.4798	54.9593	61.4885	69.6173	77.909	66.8522	66.1817	61.267	48.4032	39.9122	34.8465	30.728	29.5791	33.7327	39.5821	31.0517	40.0391	33.9308	48.1958	59.4314	60.5978	80.3436	88.4862	105.718	110.345	119.621	152.784	150.138	140.379	143.732	145.535	133.087	110.079	83.3744	76.8215	60.2292
2011-03-29 08:07:35		0	0	0	1.29021	0	1.1095	6.17564	7.93635	12.8595	11.9476	28.0457	34.9478	45.3362	71.0949	65.2676	55.3785	65.0401	67.308	62.1022	52.4628	48.4173	40.8423	28.2254	23.7282	29.8734	26.36	36.1375	29.4465	39.5897	45.9298	55.3016	59.9981	69.7692	82.1542	81.5407	113.68	118.524	119.784	136.889	136.53	146.32	141.44	135.363	134.223	117.737	86.6715	70.3788	57.0888
2011-03-29 08:22:35		0	0	0	2.58041	1.19507	3.32856	6.1751	1.91424	7.12859	24.2115	16.2388	41.8926	38.6317	54.2375	58.841	67.4862	67.9266	86.5728	66.0413	58.0766	53.6766	32.758	36.526	28.0669	28.116	32.876	28.0293	30.8203	30.3812	33.0506	34.6901	53.2801	76.466	72.4587	93.6974	96.5897	115.323	137.907	130.437	143.447	139.596	141.815	148.317	121.448	114.514	88.9032	83.2263	56.6109
2011-03-29 08:37:35		0	0	0	2.58053	0	3.32881	3.08788	5.74317	14.8725	22.8802	30.4384	37.0231	52.792	51.8641	64.6721	70.0317	66.6878	65.691	58.6067	53.8244	39.6067	38.2587	40.1561	28.5912	34.1343	28.2155	35.9221	37.251	48.625	54.6279	48.5817	60.7321	74.9843	80.8923	96.8413	97.0878	121.48	133.518	124.615	145.847	145.497	140.162	122.594	113.053	110.77	85.5548	66.866	51.1215
2011-03-29 08:52:35		0	0	0	1.29021	2.39024	1.1096	3.08778	13.4	10.6932	25.2045	28.2979	43.0798	45.184	53.9292	63.0224	77.5429	61.3856	77.2215	59.0308	51.816	47.9561	37.634	29.8612	36.666	30.6543	42.475	35.583	38.7535	40.7981	42.5154	46.2054	54.3756	80.9205	86.4212	92.3907	118.979	118.294	129.107	132.019	153.894	147.107	144.766	140.535	111.017	103.44	91.5917	75.224	64.3413
2011-03-29 09:07:35		0	0	0	0	1.19511	4.43849	6.17593	11.4867	14.2587	18.3582	32.4673	42.1532	45.1792	50.0413	60.3038	64.4997	60.1619	54.8615	58.8949	55.2769	52.224	38.8446	36.2471	30.6987	38.3122	24.8726	36.375	40.0718	42.5593	49.7814	58.2372	66.484	72.8087	79.8798	94.8058	98.9397	123.449	123.85	137.352	134.221	142.484	139.357	127.366	123.495	104.386	81.1978	73.4083	65.9923
2011-03-29 09:22:35		0	0	0	0	2.39038	1.10957	8.23558	14.3594	16.041	16.8464	22.2681	37.9971	48.2298	47.716	65.0542	74.3872	69.1567	76.1663	55.5051	39.609	42.3269	40.4516	30.888	30.7538	28.2676	34.7974	37.3426	39.0058	40.084	56.6484	52.4554	66.4763	62.7138	80.3465	95.4458	105.814	115.727	136.805	129.746	152.516	130.837	141.897	136.43	114.432	97.5234	83.2968	73.0647	55.2237
2011-03-29 09:37:35		0	0	0	3.87112	2.03746	1.43744	8.23558	14.36	16.933	16.6326	27.2197	32.5699	57.2638	56.808	59.0462	66.501	72.8571	64.925	61.4795	56.724	41.267	33.8167	34.4019	30.5904	31.7744	31.6873	36.0099	42.6449	43.1558	49.5442	54.8016	68.8176	73.159	86.5814	96.0135	109.861	118.479	120.585	134.395	143.462	129.317	126.973	141.839	130.691	104.115	89.7949	67.2045	51.2401
2011-03-29 09:52:35		0	0	0	1.29032	0	3.32897	4.11737	8.61567	14.2594	16.6331	25.4646	38.8189	38.151	50.8551	59.9923	70.4987	71.3186	65.6599	59.2833	45.0926	40.5151	41.5385	35.3968	29.2498	34.5256	32.15	34.2532	38.2144	40.2721	48.0987	71.2721	74.1077	73.1538	86.1721	93.159	109.973	117.254	132.57	148.423	142.869	144.485	138.89	118.602	114.684	107.31	93.2099	81.0901	58.058
2011-03-29 10:07:35		0	0	0	2.58073	1.19521	6.65795	10.294	6.70119	18.7151	25.889	31.7861	43.5103	48.2157	49.7974	71.5103	65.9846	73.1429	67.4429	63.4875	47.1776	39.2192	37.2048	39.6468	28.7183	33.1734	46.208	49.5404	36.3516	41.2426	54.9465	55.0638	65.1263	82.8968	87.5798	100.59	103.852	120.84	133.546	131.769	145.799	143.434	139.675	137.578	121.934	94.8673	76.0657	70.1013	49.492
2011-03-29 10:22:35		0	0	0	1.29038	0	1.10968	6.17641	7.65849	7.12958	22.4541	27.375	29.503	49.0282	63.4865	76.3971	79.3859	65.4192	61.0744	53.8583	46.7426	46.6965	42.9609	32.6311	37.2779	32.6189	34.0244	35.0885	45.7763	38.0997	38.3343	57.4715	56.1077	70.0263	87.7606	113.685	112.491	123.022	143.95	144.101	132.977	136.27	139.369	137.879	120.434	114.141	99.0266	75.3497	53.4147
2011-03-29 10:37:35		0	0	0	0	7.17167	6.65833	1.82753	17.209	25.783	26.1719	35.4298	37.1292	54.4308	55.6189	54.5926	82.2356	64.9215	67.8324	57.6987	48.7337	45.3529	39.1369	38.4811	40.7853	30.3995	27.8007	38.0417	33.8827	42.8407	52.4349	59.9484	72.2888	76.4619	89.0029	95.0692	110.22	129.17	126.46	125.391	149.279	138.141	147.242	121.693	115.952	105.755	88.0154	66.9083	56.4125
2011-03-29 10:52:35		0	0	0	0	0	3.32936	5.14721	8.6166	15.7399	27.7529	17.8123	40.6401	51.7878	56.0917	67.9782	72.149	65.4776	61.4176	65.1237	44.0372	39.2756	34.4817	32.7657	27.8854	31.0369	33.5497	41.7442	49.2179	34.033	48.5244	46.0147	62.1199	67.2894	81.9163	102.722	101.321	116.349	121.535	146.106	137.688	144.127	136.823	142.205	126.855	97.2561	90.4228	80.5311	50.0612
2011-03-29 11:07:35		0	0	0	2.58095	2.39071	5.54853	5.1475	14.3606	17.8248	26.6138	22.5051	36.4971	43.5362	56.3689	67.0846	71.3734	70.5535	61.0218	47.2788	51.8327	48.8942	36.359	34.1151	26.5288	32.5138	31.8688	39.5923	37.7955	43.7798	49.8099	56.6971	67.9452	68.1651	91.509	86.6574	114.876	133.907	122.538	122.52	145.098	145.26	137.097	131.168	112.842	112.823	83.4369	65.7423	56.9372
2011-03-29 11:22:35		0	0	0	0	3.58612	5.54869	4.91619	11.9413	11.0653	18.5775	26.65	36.933	41.8449	56.2128	60.4064	74.1272	71.7228	65.8404	64.5446	50.55	50.9462	39.3413	29.5194	26.6655	23.8217	34.9853	33.2949	38.9186	32.6157	50.7625	51.716	65.9712	73.6641	87.2378	101.838	117.267	113.461	132.29	143.434	136.843	126.384	141.933	136.496	113.992	108.839	83.7923	88.2878	59.3144
2011-03-29 11:37:35		1.63161	0	0	0.139515	5.47721	4.7833	8.23625	7.6592	22.2825	21.6567	25.6192	33.925	53.2167	58.7679	62.4545	72.5106	63.1349	65.2987	60.6173	45.976	33.0349	32.1926	30.2055	29.1913	30.9018	35.7388	39.8535	45.1048	38.2744	52.6163	56.0558	61.5644	62.5856	80.4612	92.8337	95.6064	117.58	120.703	127.322	156.052	147.987	138.071	132.758	111.529	114.373	85.9869	66.751	55.4955
2011-03-29 11:52:35		0	0	0	0.142841	5.84465	5.5491	9.26542	6.70154	13.0698	21.9525	17.0511	35.3442	36.4583	59.3471	69.7144	68.7202	81.4968	67.7811	69.3663	47.0429	42.9708	31.983	36.0776	24.221	29.103	33.6231	33.9048	37.4538	39.826	47.5538	48.1304	62.7696	63.7321	67.7702	97.2122	98.6429	96.534	122.675	121.213	141.518	145.335	148.045	126.643	119.535	114.172	93.7433	69.6551	47.8978
2011-03-29 12:07:35		0	0	0	0	1.19547	3.32923	1.02945	14.5959	15.506	15.2846	27.3848	30.2234	52.7199	51.4446	64.6029	76.2295	61.7029	77.8054	57.0676	49.3577	40.6048	32.7529	31.4804	31.3794	24.1561	33.2083	35.1753	38.5279	38.9369	48.2849	41.3808	60.2702	60.1647	65.3859	92.6343	102.13	128.439	126.808	134.019	148.167	122.997	145.99	131.713	131.427	119.459	81.0186	72.3026	59.6122
2011-03-29 12:22:35		0	0	0	0	1.19541	0	7.99353	9.80038	12.1764	22.7486	23.7202	33.9939	43.4987	61.5144	64.5205	78.2724	58.7253	70.9413	62.1282	59.4955	46.2593	42.824	27.9161	24.8209	25.1621	29.271	33.8728	30.1562	37.2359	33.1519	44.8946	65.633	65.5936	92.4436	90.4154	116.592	113.521	123.82	142.981	149.573	129.095	123.131	126.277	126.484	110.055	86.9135	73.1808	60.8394
2011-03-29 12:37:35		0	0	1.39357	0	1.19547	1.10986	6.17728	15.5225	14.6504	21.0856	31.0921	37.2872	46.9923	65.9391	58.0901	74.8292	69.8199	61.1407	61.1426	52.6035	45.9817	36.6769	36.192	34.1522	33.9804	23.3612	31.0863	38.8792	37.3369	41.4875	47.0317	72.9205	72.4779	85.2599	99.7106	113.303	123.097	125.363	140.316	143.359	141.016	122.787	140.441	126.789	106.317	90.2301	77.2106	54.0099
2011-03-29 12:52:35		0	0	1.39375	0	1.19551	4.43949	5.14785	10.7531	9.59929	22.4916	23.3179	34.8849	48.5766	50.6324	45.1199	64.7381	70.4878	63.3696	66.1112	56.6718	39.075	38.1234	30.2989	26.9573	31.7334	29.2294	39.2199	29.9439	31.756	44.9952	45.8981	57.2529	74.0558	84.4769	90.7426	99.0869	115.395	128.282	150.978	150.579	135.395	141.32	138.716	121.997	109.028	85.3458	76.8083	62.7413
2011-03-29 13:07:35		0	0	0	1.29069	2.39114	1.10998	3.08888	12.4476	15.7346	20.2482	32.3503	40.6686	45.8343	56.3346	65.4417	70.9593	70.2798	74.2135	66.4846	49.2058	43.7045	34.1141	37.3125	34.584	30.2877	25.3558	34.8474	32.3683	34.1231	40.067	57.3795	66.9215	66.1131	77.7442	102.825	107.381	111.606	138.205	129.591	145.926	138.708	133.884	133.888	112.29	121.102	83.3779	68.1881	57.7401
2011-03-29 13:22:35		0	0	1.39377	2.58123	3.58667	2.21985	6.17808	8.6175	23.7518	21.9471	31.7157	33.2157	45.5077	60.8189	64.508	79.5385	72.2766	68.0551	55.1721	57.0269	44.5244	45.9119	40.5157	22.9293	28.0221	34.5881	33.2715	35.8228	36.0112	47.8516	49.7923	62.2904	82.541	83.7365	92.3	102.571	121.723	128.436	134.433	145.819	149.766	138.788	129.25	129.173	110.679	83.6087	70.9006	63.7141
2011-03-29 13:37:35		0	0	0	0	0	6.92	7.99548	11.4905	8.91391	21.6506	35.4657	47.2337	58.0423	60.3401	63.959	66.3205	81.2279	66.9314	59.842	54.7955	47.8567	34.3683	26.626	32.0724	29.9824	38.4958	31.4737	30.6651	37.8865	48.5894	55.3032	66.1679	75.442	90.816	90.3984	110.085	113.996	127.947	130.739	133.147	149.878	134.497	126.164	110.473	103.689	84.708	74.9468	50.2804
2011-03-29 13:52:35		0	0	0	0	2.39106	3.32958	8.23689	11.9067	13.7999	32.5308	28.8108	50.3058	46.7878	51.4362	75.7872	84.8135	82.092	78.6343	71.7426	63.1734	41.0013	33.9362	31.7101	31.3574	30.61	28.8463	33.2064	47.6926	37.424	51.1872	49.2144	67.4721	73.3814	78.9779	108.87	102.16	118.128	129.721	132.848	132.033	149.229	138.017	133.798	120.621	114.877	95.9378	70.9571	48.1058
2011-03-29 14:07:35		0	0	0	0	0	3.32974	2.0591	11.4906	17.4924	28.5954	20.5663	46.1369	44.6833	53.1429	60.116	80.9026	81.9212	62.6356	54.6635	55.324	38.9199	37.6455	36.2096	29.6278	30.0707	26.6174	40.2103	39.1599	42.3933	53.9244	58.192	67.7048	64.6647	84.8298	88.5019	94.9087	109.223	131.849	133.471	145.397	140.412	134.495	133.786	128.918	114.793	75.1593	75.333	56.6824
2011-03-29 14:22:35		0	0	0	0	2.39119	4.43978	7.20721	8.61769	16.936	19.9599	38.6179	41.6401	50.9881	49.4772	67.1962	68.2391	81.3849	70.6894	62.3471	49.7567	36.4144	44.7612	35.3272	36.7958	35.3074	38.9869	32.7663	25.9431	38.0372	36.1013	49.3577	61.2452	65.3051	75.0772	102.837	107.633	120.254	135.33	151.012	145.609	139.95	139.517	137.31	117.682	114.87	91.8013	75.4019	50.4926
2011-03-29 14:37:35		0	0	0	1.29061	2.39117	3.57917	6.97631	7.85628	10.5145	17.4682	30.5138	38.4244	43.8821	43.3647	64.0212	72.1103	70.3747	72.6926	60.4715	51.7147	43.2571	37.1163	39.7974	27.7897	26.7853	26.764	36.8635	30.6679	37.2869	45.6699	55.3196	61.5587	75.4465	85.9974	96.0035	120.6	130.833	124.608	141.857	136.689	130.463	128.952	125.453	118.449	103.249	80.017	75.8904	58.7099
2011-03-29 14:52:35		0	0	0	1.2908	0	6.89708	2.86979	14.5469	12.4894	22.2177	30.2782	41.7058	45.7561	57.976	78.5401	67.801	68.0228	70.8122	66.3138	47.5612	42.5378	41.9644	31.0038	34.4651	34.4673	31.9437	38.6849	30.8389	43.0388	44.6356	46.4282	60.5667	80.1686	73.7606	92.8817	100.841	116.651	123.91	120.383	143.872	152.732	140.715	137.792	110.006	103.315	90.1535	74.3766	52.8843
2011-03-29 15:07:35		0	0	0	1.29107	0	2.22029	7.20926	13.7225	18.4311	20.7346	35.5218	35.4782	49.901	61.2798	65.3712	76.7067	73.4676	74.9599	55.2577	60.2571	43.8516	37.7026	32.649	35.1266	43.076	33.7696	40.0702	40.2849	39.3994	39.4359	47.1551	69.3676	77.6651	82.176	94.3375	102.239	116.736	129.507	131.464	138.902	143.498	149.002	136.188	111.643	107.965	88.0083	80.6497	59.8311
[truncated: 11,707 more rows]
[truncated: 19 more columns]

## Sheet: Filter data
For the Alert Station
Nanograms/m^3 @ 1 atm 0C°
2004 -- 2009
							ng/m3	ng/m3	ng/m3	ng/m3	ng/m3	ng/m3	ng/m3	ng/m3	ng/m3	ng/m3	ng/m3	ng/m3
[truncated: 79 more rows]
